# Supplementary material
Source: HighWire-hosted journal article supplement (https://www.jpn.ca/highwire/filestream/89404/field_highwire_adjunct_files/0/jpn-190156-1-at.pdf)
Supplement: jpn-190156-1-at.pdf [file jpn-190156-1-at.pdf]

**Appendix 1** to Espinoza Oyarce DA, Shaw ME, Alateeq K, et al. Volumetric brain differences in clinical depression in association with anxiety: a systematic review with meta-analysis. *J Psychiatry Neurosci* 2020.

DOI: 10.1503/jpn.190156

Copyright © 2020 The Author(s) or their employer(s). To receive this resource in an accessible format, please contact us at [cmajgroup@cmaj.ca](mailto:cmajgroup@cmaj.ca).

*Online appendices are unedited and posted as supplied by the authors.*

## **Volumetric brain differences in clinical depression in association with anxiety: a systematic review with meta-analysis**

Espinoza Oyarce, DA (MNeurosci); Shaw, ME (PhD); Alateeq, K (MMagResonTech); Prof Cherbuin, N (PhD)

### **Supplemental Methods**

Supplemental Table S1. Modified Newcastle-Ottawa scale **p43**

### **Supplemental Results**

|                                                                                                                  |             |
|------------------------------------------------------------------------------------------------------------------|-------------|
| Supplemental Table S2. Detailed demographic data of included studies                                             | <b>p44</b>  |
| Supplemental Table S3. Detailed NOS scores                                                                       | <b>p49</b>  |
| Supplemental Table S4. Meta-analysis results per brain region                                                    | <b>p56</b>  |
| Supplemental Table S5. Assessment of anxiety comorbidity per brain region                                        | <b>p64</b>  |
| Supplemental Table S6. Sensitivity analyses on selection of homogeneous groups                                   | <b>p71</b>  |
| Supplemental Table S7. Sensitivity analyses on selection of homogeneous groups in anxiety comorbidity assessment | <b>p73</b>  |
| Supplemental Table S8. Assessment of study influence                                                             | <b>p75</b>  |
| Supplemental Table S9. Assessment of bias                                                                        | <b>p78</b>  |
| Supplemental Table S10. Meta-regression results                                                                  | <b>p88</b>  |
| Supplemental Figure S1. TBV forest plots                                                                         | <b>p96</b>  |
| Supplemental Figure S2. TBV assessment of anxiety comorbidity forest plots                                       | <b>p97</b>  |
| Supplemental Figure S3. GMV forest plots                                                                         | <b>p98</b>  |
| Supplemental Figure S4. GMV assessment of anxiety comorbidity forest plots                                       | <b>p99</b>  |
| Supplemental Figure S5. THcV forest plots                                                                        | <b>p100</b> |
| Supplemental Figure S6. THcV assessment of anxiety comorbidity forest plots                                      | <b>p102</b> |
| Supplemental Figure S7. RHcV forest plots                                                                        | <b>p104</b> |
| Supplemental Figure S8. RHcV assessment of anxiety comorbidity forest plots                                      | <b>p106</b> |
| Supplemental Figure S9. LHcV forest plots                                                                        | <b>p108</b> |
| Supplemental Figure S10. LHcV assessment of anxiety comorbidity forest plots                                     | <b>p110</b> |
| Supplemental Figure S11. TAV forest plots                                                                        | <b>p112</b> |
| Supplemental Figure S12. TAV assessment of anxiety comorbidity forest plots                                      | <b>p113</b> |
| Supplemental Figure S13. RAV forest plots                                                                        | <b>p114</b> |
| Supplemental Figure S14. RAV assessment of anxiety comorbidity forest plots                                      | <b>p115</b> |
| Supplemental Figure S15. LAV forest plots                                                                        | <b>p116</b> |
| Supplemental Figure S16. LAV assessment of anxiety comorbidity forest plots                                      | <b>p117</b> |
| Supplemental Figure S17. TPuV forest plots                                                                       | <b>p118</b> |
| Supplemental Figure S18. TPuV assessment of anxiety comorbidity forest plots                                     | <b>p119</b> |
| Supplemental Figure S19. RPuV forest plots                                                                       | <b>p120</b> |
| Supplemental Figure S20. RPuV assessment of anxiety comorbidity forest plots                                     | <b>p121</b> |
| Supplemental Figure S21. LPuV forest plots                                                                       | <b>p122</b> |
| Supplemental Figure S22. LPuV assessment of anxiety comorbidity forest plots                                     | <b>p123</b> |
| Supplemental Figure S23. TCV forest plots                                                                        | <b>p124</b> |
| Supplemental Figure S24. TCV assessment of anxiety comorbidity forest plots                                      | <b>p125</b> |
| Supplemental Figure S25. RCV forest plots                                                                        | <b>p126</b> |
| Supplemental Figure S26. RCV assessment of anxiety comorbidity forest plots                                      | <b>p127</b> |
| Supplemental Figure S27. LCV forest plots                                                                        | <b>p128</b> |
| Supplemental Figure S28. LCV assessment of anxiety comorbidity forest plots                                      | <b>p129</b> |
| Supplemental Figure S29. TPaV forest plots                                                                       | <b>p130</b> |
| Supplemental Figure S30. TPaV assessment of anxiety comorbidity forest plots                                     | <b>p131</b> |
| Supplemental Figure S31. RPaV forest plots                                                                       | <b>p132</b> |

**Appendix 1** to Espinoza Oyarce DA, Shaw ME, Alateeq K, et al. Volumetric brain differences in clinical depression in association with anxiety: a systematic review with meta-analysis. *J Psychiatry Neurosci* 2020.

DOI: 10.1503/jpn.190156

*Online appendices are unedited and posted as supplied by the authors.*

|                                                                             |             |
|-----------------------------------------------------------------------------|-------------|
| Supplemental Figure S32. RPaV assessment of anxiety comorbidity forest plot | <b>p133</b> |
| Supplemental Figure S33. LPaV forest plots                                  | <b>p134</b> |
| Supplemental Figure S34. LPaV assessment of anxiety comorbidity forest plot | <b>p135</b> |
| Supplemental Figure S35. TTV forest plots                                   | <b>p136</b> |
| Supplemental Figure S36. TTV assessment of anxiety comorbidity forest plot  | <b>p137</b> |
| Supplemental Figure S37. RTV forest plot                                    | <b>p138</b> |
| Supplemental Figure S38. RTV assessment of anxiety comorbidity forest plot  | <b>p139</b> |
| Supplemental Figure S39. LTV forest plot                                    | <b>p140</b> |
| Supplemental Figure S40. LTV assessment of anxiety comorbidity forest plot  | <b>p141</b> |
| Supplemental Figure S41. TAcV forest plot                                   | <b>p142</b> |
| Supplemental Figure S42. WMV forest plots                                   | <b>p143</b> |
| Supplemental Figure S43. WMV assessment of anxiety comorbidity forest plot  | <b>p144</b> |
| Supplemental Figure S44. ICV forest plots                                   | <b>p145</b> |
| Supplemental Figure S45. ICV assessment of anxiety comorbidity forest plots | <b>p147</b> |

**Appendix 1** to Espinoza Oyarce DA, Shaw ME, Alateeq K, et al. Volumetric brain differences in clinical depression in association with anxiety: a systematic review with meta-analysis. *J Psychiatry Neurosci* 2020.

DOI: 10.1503/jpn.190156

*Online appendices are unedited and posted as supplied by the authors.*

## **Supplemental Methods**

### **Data extraction**

Data extracted included sample size, age, gender, and brain volumes for all studies. When provided, years of education, Mini-Mental State Examination (MMSE)<sup>1</sup> score, field strength, and segmentation type were also extracted. Further information was extracted for participants with depression including diagnostic method (i.e., Diagnostic and Statistical Manual of Mental Disorders (DSM)/International Classification of Diseases and Related Health Problems (ICD)), depressive and anxious symptomatology, depression status, number of previous episodes, onset and duration of illness, family history of depression, medication status (if in medication, medicines taken), and treatment resistance.

Data on depression status and explicit classification from reports were used to categorize depression subgroups at data extraction. No *a priori* subgroups were established, and categorisation was driven by the retrieved studies. These groups included current (Cur) or remitted (Rem) depression, subtype of depression (melancholic (Mel), psychotic (Psy), or atypical (Aty)), first (FE) or multiple (ME) episodes of depression, age of onset of depression (paediatric (PO), adult (AO), early (EO), or late (LO)), family history (FH) of depression, intake of antidepressants (Med/noMed), treatment resistance (TR), comorbidity with anxiety disorders (Anx), suicide attempt/ideation (Sui), and physical/sexual abuse (Abu). Heterogeneous samples and samples that could not be included in the above groups due to lack of information were merged into a mixed group (Mix), in an effort to reduce some of the heterogeneity in main analyses. In many instances, the Mix group represented the combined effect of subgroups, such as EO/LO, FE/ME, or Cur/Rem. If more than one category was suitable, other homogeneous subgroups were given precedence over Cur and Rem to prioritize other clinical features. Similarly, Cur and Rem subgroups were given precedence over Mix group.

### **Quality assessment**

Quality of studies was assessed at study level with the Newcastle-Ottawa scale (NOS)<sup>2</sup>, modified based on validated items included in previous reviews<sup>3,4</sup>. Modifications were developed in consultation with senior author, and agreed by all authors. Studies were rated using a star-system and were judged based on the selection of healthy controls (HC) and depressed participants (DEP), on the comparability of these groups, on the ascertainment of depression assessment, and on non-response rates. A maximum of ten stars could be awarded to a study (**Supplemental Table S1**).

**Appendix 1** to Espinoza Oyarce DA, Shaw ME, Alateeq K, et al. Volumetric brain differences in clinical depression in association with anxiety: a systematic review with meta-analysis. *J Psychiatry Neurosci* 2020.

DOI: 10.1503/jpn.190156

*Online appendices are unedited and posted as supplied by the authors.*

### **Missing data**

If total volume measures were not reported, mean and standard deviation (SD) were derived from right and left volume measures according to the following formula:

$$mean_{Total} = mean_{Right} + mean_{Left} \quad SD_{Total} = \sqrt{SD_{Right}^2 + SD_{Left}^2}$$

### **Sample selection in meta-analyses**

A number of studies reported brain measures on multiple depression subgroups. Studies reporting on multiple independent subgroups were included in main analyses as separate samples, and then independently investigated in subgroup analyses. Studies reporting on multiple subgroups that were not independent were selected based on sample size: the largest subgroup was selected for main analyses, and then all subgroups were independently investigated in subgroup analyses. However, if sample size was identical between dependent subgroups, homogenous subgroups were selected for main analyses, and then all subgroups were independently investigated in subgroup analyses. Sensitivity analyses were conducted on the selection of homogeneous groups. Please refer to **Assessment of subgroup selection** and **Supplemental Tables S6 and S7**.

### **Meta-regression**

Analyses first investigated the influence of age and sex as independent demographic variables of cohorts, that is, mean age/gender of HC and mean age/gender of DEP separately, and then combined into single measures of these demographics. While there were no substantial differences in age between cohorts, the number of females varied greatly between HC and DEP in some studies (visual inspection) and, thus, sex was further investigated as the difference in percent female between cohorts. Two models were used based on these observations: model A, with mean age of HC and DEP, and percent female of HC and DEP; and model B, with mean age of HC and DEP, and the difference in percent female between HC and DEP. In hippocampus volume (HcV), segmentation procedure, depressive symptoms, and medication status were investigated individually; with only segmentation procedure investigated within models due to power constraints.

## **Supplemental Results**

### **Included studies**

The online search identified 13,637 references. Once duplicates were removed, 9,229 unique references were screened by title. Title screening excluded 8,669 irrelevant entries, leaving 560 abstracts to be screened. Abstract

**Appendix 1** to Espinoza Oyarce DA, Shaw ME, Alateeq K, et al. Volumetric brain differences in clinical depression in association with anxiety: a systematic review with meta-analysis. *J Psychiatry Neurosci* 2020.

DOI: 10.1503/jpn.190156

*Online appendices are unedited and posted as supplied by the authors.*

screening excluded a further 205 entries that failed inclusion/exclusion criteria, leaving 355 articles to be screened by full-text. Full-text screening excluded a further 43 articles that failed inclusion/exclusion criteria, leaving 312 articles for inclusion in review. After accounting for population studies, voxel-based morphometry (VBM), multiple reports of the same sample, white matter hyperintensity (WMH) studies and brain structures not included in the review due to insufficient studies, 105 articles from the online search were included in analyses.

19 studies were obtained through manual search, five<sup>5-9</sup> of which were from bibliographies while the remaining<sup>10-24</sup> were from previous reviews<sup>25-27</sup>. Four studies<sup>20,21,23,24</sup> that failed inclusion/exclusion criteria were excluded by full-text screening, leaving 15 articles for inclusion in review. After accounting for population studies, VBM, multiple reports of the same sample, WMH and brain structures not included in the review, seven studies<sup>5,6,10-12,15,16</sup> from manual search were included in the review. Ultimately, 112 studies were included in analyses comprising 105 records from online search and seven records from manual search. Detailed demographics of HC and DEP included can be found in **Supplemental Table S2**.

### **Quality assessment**

Detailed description of scores can be found in **Supplemental Table S3**. Studies were rated out of 10 stars. The lowest score was 4.5/10 stars in three studies<sup>28-30</sup>, while the highest score was 8.5/10 stars in 19 studies<sup>31-49</sup>. The three studies with low score were included in large meta-analyses for ICV, TBV, hippocampus, amygdala, putamen, and caudate where exclusion was unlikely to influence effect sizes. A sensitivity analysis on the moderating effect of NOS scores in total HcV found no significant results ( $k=61$ ,  $QM-p=0.1871$ ).

### **Meta-analyses**

Management of duplicate samples was specific to brain region, and thus excluded studies have been specified for each analysis. In total 11 regions were investigated given minimum requirements: four global measures (GMV, WMV, TBV, and ICV), and seven subcortical measures (hippocampus, amygdala, caudate, pallidum, putamen, thalamus, and nucleus accumbens). Although there were enough studies to investigate some cortical regions such as frontal lobe<sup>50-52</sup>, orbitofrontal cortex<sup>53-55</sup>, anterior cingulate cortex (ACC<sup>53,56,57</sup>), and subgenual ACC<sup>57-59</sup>, tracing methods varied greatly and could not be pooled into meta-analyses. Furthermore, in the case of subgenual ACC, both tracing methods and naming differed among studies.

**Appendix 1** to Espinoza Oyarce DA, Shaw ME, Alateeq K, et al. Volumetric brain differences in clinical depression in association with anxiety: a systematic review with meta-analysis. *J Psychiatry Neurosci* 2020.

DOI: 10.1503/jpn.190156

*Online appendices are unedited and posted as supplied by the authors.*

*TBV*

#### Excluded studies

15 studies<sup>52,60-73</sup> were identified as duplicates and were excluded from analyses according to Methods. Two studies<sup>74,75</sup> were excluded since neither age or gender could be established. One study<sup>17</sup> was excluded since age of HC could not be established. Two studies<sup>76,77</sup> were excluded due to the large variance in TBV measures. One study<sup>78</sup> was identified as an outlier in DEP main analyses and was excluded from these analyses.

#### Forest plots

Individual forest plots of main and subgroup analyses are shown in **Supplemental Figure S1**.

#### Results

31 studies<sup>5,12,15,29,31,32,36,38,39,41,46,50,51,54,78-94</sup> reporting differences in TBV were included (n=3,095, age=54.8 years, 66.7% female). No significant differences were found. Significant heterogeneity was found with DEP-LO (**Supplemental Table S4**).

#### Anxiety comorbidity assessment

##### Excluded studies

15 studies<sup>29,31,39,50,51,54,78,79,82-85,87,91,95</sup> were excluded since no clear information on anxiety comorbidity could be established.

##### Forest plots

Individual forest plots of main and subgroup analyses are shown in **Supplemental Figure S2**.

##### Anxiety exclusion results

12 studies<sup>5,32,36,38,80,81,86,88-90,92,93</sup> reporting differences in TBV excluding anxiety disorders were included (n=1,565, age=59.7 years, 66.5% female). No significant volumetric differences were found between HC and DEP, or in subgroup analyses (**Supplemental Table S5**).

**Appendix 1** to Espinoza Oyarce DA, Shaw ME, Alateeq K, et al. Volumetric brain differences in clinical depression in association with anxiety: a systematic review with meta-analysis. *J Psychiatry Neurosci* 2020.

DOI: 10.1503/jpn.190156

*Online appendices are unedited and posted as supplied by the authors.*

Anxiety comorbidity results

Four studies<sup>12,15,41,46</sup> with comorbid anxiety disorders were included (n=458, age=36.1 years 64.8% female). No significant differences were found between HC and DEP (**Supplemental Table S5**).

*GMV*

Excluded studies

No duplicates were found, except for multiple groups of DEP in one study<sup>96</sup>. The groups reported included DEP-Mix, DEP-PO and DEP-AO, and first-episode (FE) and multiple-episodes (ME) of depression. DEP-Mix, DEP-PO and DEP-AO groups were segregated according to comorbidity with anxiety disorders; whereas DEP-FE and DEP-ME presented comorbidity. Given sample size, DEP-Mix with and without comorbidity were selected for main analysis as per Methods, while homogeneous groups were selected for subgroup analyses. One study<sup>77</sup> was excluded due to large variance in GMV measures.

Forest plots

Individual forest plots of main and subgroup analyses are shown in **Supplemental Figure S3**.

Anxiety comorbidity assessment

Excluded studies

Three studies<sup>16,84,87</sup> were excluded since no clear information on anxiety comorbidity could be established.

Forest plots

Individual forest plots of main and subgroup analyses are shown in **Supplemental Figure S4**.

Anxiety comorbidity results

Five studies<sup>41,96-99</sup> with comorbid anxiety disorders were included (n=742, age=37.6 years, 62.1% female). No significant volumetric differences were found between HC and DEP (**Supplemental Table S5**).

**Appendix 1** to Espinoza Oyarce DA, Shaw ME, Alateeq K, et al. Volumetric brain differences in clinical depression in association with anxiety: a systematic review with meta-analysis. *J Psychiatry Neurosci* 2020.

DOI: 10.1503/jpn.190156

*Online appendices are unedited and posted as supplied by the authors.*

### *Hippocampus volume*

#### *Total hippocampus volume*

##### Excluded studies

13 studies<sup>28,31,32,44,54,64,78,100-105</sup> reported differences in total hippocampal volume (THcV), four of which<sup>32,44,54,100</sup> also reported right (RHcV) and left (LHcV) volumes. 47 studies<sup>10,18,30,33,37,39,40,43,46,49,68,71,77,80,86,88,92,93,106-134</sup> reported differences in RHcV and LHcV, from which THcV was derived according to Supplemental Methods. Nine studies<sup>18,64,68,71,112,115,124,126,134</sup> were identified as duplicates and were excluded from analyses according to Methods. Five studies<sup>43,44,92,116,131</sup> belonged to the same research group and reported volumes for DEP-Mix<sup>131</sup>, DEP-EO DEP-LO<sup>44</sup>, DEP-Mel and DEP-Aty<sup>116</sup>, DEP-Rem<sup>43</sup>, and DEP-Cur<sup>92</sup>. Given sample size, DEP-Cur was selected for DEP main analyses, while all others were for subgroup analyses. However, not enough studies were available to conduct DEP-Mel/DEP-Aty analyses and, therefore, this study<sup>116</sup> was not included. One study<sup>10</sup> reported volumes using manual and automated segmentation, with manual segmentation selected for analyses. Three studies<sup>74,75,135</sup> were excluded since neither age or gender of samples could be established.

##### Forest plots

Individual forest plots of main and subgroup analyses are shown in **Supplemental Figure S5**.

##### Anxiety comorbidity assessment

##### Excluded studies

11 studies<sup>10,28,30,31,39,54,78,101,105,108,128</sup> were excluded since no clear information on anxiety comorbidity could be established.

##### Forest plots

Individual forest plots of main and subgroup analyses are shown in **Supplemental Figure S6**.

##### Anxiety comorbidity results

Ten studies<sup>46,100,102,114,120,122,123,129,130,132</sup> with comorbid anxiety disorders were included (n=1,049, age=36.7 years, 58.2% female). No significant volumetric differences were found between HC and DEP, or in subgroup analysis. Significant heterogeneity was found in all analyses (**Supplemental Table S5**).



**Appendix 1** to Espinoza Oyarce DA, Shaw ME, Alateeq K, et al. Volumetric brain differences in clinical depression in association with anxiety: a systematic review with meta-analysis. *J Psychiatry Neurosci* 2020.

DOI: 10.1503/jpn.190156

*Online appendices are unedited and posted as supplied by the authors.*

*Right hippocampus volume*

#### Excluded studies

Eight studies<sup>18,68,71,112,115,124,126,134</sup> were identified as duplicates and were excluded from analyses according to Methods. Five studies<sup>43,44,92,116,131</sup> belonged to the same research group and reported volumes for DEP-Mix<sup>131</sup>, DEP-EO and DEP-LO<sup>44</sup>, DEP-Mel and DEP-Aty<sup>116</sup>, DEP-Rem<sup>43</sup>, and DEP-Cur<sup>92</sup>. Given sample size, DEP-Cur was selected for DEP main analyses, while all others were selected for subgroup analyses. However, not enough studies were available to conduct DEP-Mel/DEP-Aty analyses and, therefore, this study<sup>116</sup> was not included. One study<sup>10</sup> reported volumes using manual and automated segmentation, with manual segmentation selected for analyses. Three studies<sup>74,75,135</sup> were excluded since neither age or gender could be established.

#### Forest plots

Individual forest plots of main and subgroup analyses are shown in **Supplemental Figure S7**.

#### Anxiety comorbidity assessment

##### Excluded studies

Six studies<sup>10,30,39,54,108,128</sup> were excluded since no clear information on anxiety comorbidity could be established.

##### Forest plots

Individual forest plots of main and subgroup analyses are shown in **Supplemental Figure S8**.

##### Anxiety comorbidity results

Nine studies<sup>46,100,114,120,122,123,129,130,132</sup> with comorbid anxiety disorders were included (n=1,006, age=36.8 years, 58.1% female). No significant volumetric differences were found between HC and DEP, or in subgroup analyses. Significant heterogeneity was found in all analyses (**Supplemental Table S5**).

**Appendix 1** to Espinoza Oyarce DA, Shaw ME, Alateeq K, et al. Volumetric brain differences in clinical depression in association with anxiety: a systematic review with meta-analysis. *J Psychiatry Neurosci* 2020.

DOI: 10.1503/jpn.190156

*Online appendices are unedited and posted as supplied by the authors.*

### *Left hippocampus volume*

#### Excluded studies

Eight studies<sup>18,68,71,112,115,124,126,134</sup> were identified as duplicates and were excluded from analyses according to Methods. Five studies<sup>43,44,92,116,131</sup> belonged to the same research group and reported volumes for DEP-Mix<sup>131</sup>, DEP-EO and DEP-LO<sup>44</sup>, DEP-Mel and DEP-Aty<sup>116</sup>, DEP-Rem<sup>43</sup>, and DEP-Cur<sup>92</sup>. Given sample size, DEP-Cur was selected for DEP main analyses, while all others were selected for subgroup analyses. However, not enough studies were available to conduct DEP-Mel/DEP-Aty analyses and, therefore, this study<sup>116</sup> was not included. One study<sup>10</sup> reported volumes using manual and automated segmentation, with manual segmentation selected for analyses. Three studies<sup>74,75,135</sup> were excluded since neither age or gender could be established.

#### Forest plots

Individual forest plots of main and subgroup analyses are shown in **Supplemental Figure S9**.

#### Anxiety comorbidity assessment

##### Excluded studies

Six studies<sup>10,30,39,54,108,128</sup> were excluded since no clear information on anxiety comorbidity could be established.

##### Forest plots

Individual forest plots of main and subgroup analyses are shown in **Supplemental Figure S10**.

##### Anxiety comorbidity results

Nine studies<sup>46,100,114,120,122,123,129,130,133</sup> with comorbid anxiety disorders were included (n=1,006, age=36.8 years, 58.1% female). No significant volumetric differences were found between HC and DEP, or in subgroup analyses. Significant heterogeneity was found in all analyses (**Supplemental Table S5**).

**Appendix 1** to Espinoza Oyarce DA, Shaw ME, Alateeq K, et al. Volumetric brain differences in clinical depression in association with anxiety: a systematic review with meta-analysis. *J Psychiatry Neurosci* 2020.

DOI: 10.1503/jpn.190156

*Online appendices are unedited and posted as supplied by the authors.*

*Amygdala volume*

*Total amygdala volume*

#### Excluded studies

Three studies<sup>28,101,136</sup> reported differences in total amygdala volume (TAV), one of which<sup>136</sup> also reported right (RAV) and left (LAV) volumes. 17 studies<sup>5,6,37,46,47,69,73,81,93,110,111,113,114,120,133,137,138</sup> reported differences in RAV and LAV, from which TAV was derived according to Supplemental Methods. Two studies<sup>5,113</sup> were identified as duplicates and were excluded from analyses according to Methods. One study<sup>136</sup> was excluded since age of DEP sample could not be established. One study<sup>138</sup> was excluded since accurate number of males and females in DEP could not be established. One study<sup>135</sup> was excluded since neither age or gender of samples could be established. The same research group reported measures for DEP-Mix and DEP-Rem and DEP-Cur<sup>111</sup>, and DEP-FE and DEP-ME<sup>6</sup>. Given sample size, DEP-FE and DEP-ME were selected for main analysis as per Methods.

#### Forest plots

Individual forest plots of main and subgroup analyses are shown in **Supplemental Figure S11**.

#### Results

16 studies<sup>6,28,37,46,47,69,73,81,93,101,110,111,114,120,133,137</sup> reporting differences in TAV (n=1,241, age=46.7 years, 61.6% female) were included. No significant differences were found. Most analyses showed significant heterogeneity (**Supplemental Table S4**).

#### Anxiety comorbidity assessment

##### Excluded studies

Two studies<sup>28,101</sup> were excluded since no clear information on anxiety comorbidity could be established. The same research group reported measures for DEP-Mix and DEP-Rem and DEP-Cur<sup>111</sup>, and DEP-FE and DEP-ME<sup>6</sup> excluding anxiety disorders. Given sample size, DEP-FE and DEP-ME were selected for main analysis as per Methods.

##### Forest plots

Individual forest plots of main and subgroup analyses are shown in **Supplemental Figure S12**.

**Appendix 1** to Espinoza Oyarce DA, Shaw ME, Alateeq K, et al. Volumetric brain differences in clinical depression in association with anxiety: a systematic review with meta-analysis. *J Psychiatry Neurosci* 2020.

DOI: 10.1503/jpn.190156

*Online appendices are unedited and posted as supplied by the authors.*

Anxiety exclusion results

Ten studies<sup>6,37,47,69,81,93,110,111,133,137</sup> reporting differences in TAV excluding anxiety disorders were included (n=765, age=51.9 years, 64.1% female). No significant volumetric differences were found between HC and DEP, on in subgroup analyses. However, a trend was found in DEP analysis. Significant heterogeneity was found in all analyses (**Supplemental Table S5**).

*Right amygdala volume*

Excluded studies

Two studies<sup>5,113</sup> were identified as duplicates and were removed from analyses according to Methods. One study<sup>136</sup> was excluded since age of DEP sample could not be established. One study<sup>138</sup> was excluded since accurate number of males and females could not be established. One study<sup>135</sup> was excluded since neither age or gender of samples could be established. The same research group reported measures for DEP-Mix and DEP-Rem and DEP-Cur<sup>111</sup>, and DEP-FE and DEP-ME<sup>6</sup>. Given sample size, DEP-FE and DEP-ME were selected for main analysis as per Methods.

Forest plots

Individual forest plots of main and subgroup analyses are shown in **Supplemental Figure S13**.

Results

14 studies<sup>6,37,46,47,69,73,81,93,110,111,114,120,133,137</sup> reporting differences in RAV were included (n=1,131, age=46.8 years, 61.2% female). No significant differences were found. Most analyses showed significant heterogeneity (**Supplemental Table S4**).

Anxiety comorbidity assessment

Excluded studies

All included studies had information on anxiety comorbidity. The same research group reported measures for DEP-Mix and DEP-Rem and DEP-Cur<sup>111</sup>, and DEP-FE and DEP-ME<sup>6</sup> excluding anxiety disorders. Given sample size, DEP-FE and DEP-ME were selected for main analysis as per Methods.

**Appendix 1** to Espinoza Oyarce DA, Shaw ME, Alateeq K, et al. Volumetric brain differences in clinical depression in association with anxiety: a systematic review with meta-analysis. *J Psychiatry Neurosci* 2020.

DOI: 10.1503/jpn.190156

*Online appendices are unedited and posted as supplied by the authors.*

Forest plots

Individual forest plots of main and subgroup analyses are shown in **Supplemental Figure S14**.

Anxiety exclusion results

Ten studies<sup>6,37,47,69,81,93,110,111,133,137</sup> reporting differences in RAV excluding anxiety disorders (n= 765, age= 51.9 years, 64.1% female) were included. No significant volumetric differences were found between HC and DEP, or in subgroup analyses. Significant heterogeneity was found in DEP and DEP-FE analyses (**Supplemental Table S5**).

Anxiety comorbidity results

Four studies<sup>46,73,114,120</sup> with comorbid anxiety disorders were included (n=366, age=36.2 years, 55.2% female). No significant volumetric differences were found between HC and DEP (**Supplemental Table S5**).

*Left amygdala volume*

Excluded studies

Two studies<sup>5,113</sup> were identified as duplicates and were removed from analyses according to Methods. One study<sup>136</sup> was excluded since age of DEP sample could not be established. One study<sup>138</sup> was excluded since accurate number of males and females could not be established. One study<sup>135</sup> was excluded since neither age or gender of samples could be established. The same research group reported measures for DEP-Mix and DEP-Rem and DEP-Cur<sup>111</sup>, and DEP-FE and DEP-ME<sup>6</sup>. Given sample size, DEP-FE and DEP-ME were selected for main analysis as per Methods.

Forest plots

Individual forest plots of main and subgroup analyses are shown in **Supplemental Figure S15**.

Results

14 studies<sup>6,37,46,47,69,73,81,93,110,111,114,120,133,137</sup> reporting differences in LAV were included (n=1,131, age=46.8 years, 61.2% female). No significant differences were found. Most analyses showed significant heterogeneity (**Supplemental Table S4**).

**Appendix 1** to Espinoza Oyarce DA, Shaw ME, Alateeq K, et al. Volumetric brain differences in clinical depression in association with anxiety: a systematic review with meta-analysis. *J Psychiatry Neurosci* 2020.

DOI: 10.1503/jpn.190156

*Online appendices are unedited and posted as supplied by the authors.*

#### Anxiety comorbidity assessment

##### Excluded studies

All included studies had information on anxiety comorbidity. The same research group reported measures for DEP-mix and DEP-Rem and DEP-Cur<sup>111</sup>, and DEP-FE and DEP-ME<sup>6</sup> excluding anxiety disorders. Given sample size, DEP-FE and DEP-ME were selected for main analysis as per Methods.

##### Forest plots

Individual forest plots of main and subgroup analyses are shown in **Supplemental Figure S16**.

##### Anxiety exclusion results

Ten studies<sup>6,37,47,69,81,93,110,111,133,137</sup> reporting differences in LAV excluding anxiety disorders (n=765, age=51.9 years, 64.1% female) were included. No significant volumetric differences were found between HC and DEP, or in subgroup analyses. However, a trend was found in DEP analysis. Except for DEP-Mix, significant heterogeneity was found in all analyses (**Supplemental Table S5**).

##### *Putamen volume*

##### *Total putamen volume*

#### Excluded studies

Seven studies<sup>14,28,52,95,139-141</sup> reported differences in total putamen volume (TPuV), one of which<sup>139</sup> also reported right (RPuV) and left (LPuV) volumes. Nine studies<sup>37,38,114,122,128,133,137,142,143</sup> reported differences in RPuV and LPuV, from which TPuV was derived according to Supplemental Methods. Two studies<sup>14,52</sup> were identified as a duplicates and were excluded from analyses according to Methods. One study<sup>139</sup> was excluded since number males and females could not be established.

#### Forest plots

Individual forest plots of main and subgroup analyses are shown in **Supplemental Figure S17**.

**Appendix 1** to Espinoza Oyarce DA, Shaw ME, Alateeq K, et al. Volumetric brain differences in clinical depression in association with anxiety: a systematic review with meta-analysis. *J Psychiatry Neurosci* 2020.

DOI: 10.1503/jpn.190156

*Online appendices are unedited and posted as supplied by the authors.*

#### Anxiety comorbidity assessment

##### Excluded studies

Three studies<sup>28,128,140</sup> were excluded since no clear information on anxiety comorbidity could be established.

##### Forest plots

Individual forest plots of main and subgroup analyses are shown in **Supplemental Figure S18**.

##### Anxiety comorbidity results

Four studies<sup>95,114,122,141</sup> reporting differences in TPuV including anxiety disorders were included (n=836, age=38.1 years, 58.9% female). No significant differences were found between HC and DEP. Significant heterogeneity was found (**Supplemental Table S5**).

#### *Right putamen volume*

##### Excluded studies

No duplicates were found. One study<sup>139</sup> was excluded since the number of males and females could not be established.

##### Forest plots

Individual forest plots of main and subgroup analyses are shown in **Supplemental Figure S19**.

#### Anxiety comorbidity assessment

##### Excluded studies

One study<sup>128</sup> was excluded since no clear information on anxiety comorbidity could be established. The analysis with anxiety comorbidity was not conducted since only two studies<sup>114,122</sup> were available.

##### Forest plots

Individual forest plots of main and subgroup analyses are shown in **Supplemental Figure S20**.

**Appendix 1** to Espinoza Oyarce DA, Shaw ME, Alateeq K, et al. Volumetric brain differences in clinical depression in association with anxiety: a systematic review with meta-analysis. *J Psychiatry Neurosci* 2020.

DOI: 10.1503/jpn.190156

*Online appendices are unedited and posted as supplied by the authors.*

### *Left putamen volume*

#### Excluded studies

No duplicates were found. One study<sup>139</sup> was excluded since the number of males and females could not be established.

#### Forest plots

Individual forest plots of main and subgroup analyses are shown in **Supplemental Figure S21**.

#### Results

Nine studies<sup>37,38,114,122,128,133,137,142,143</sup> reporting differences in LPuV were included (n=1,248, age=47.8 years, 59.3% female). No significant differences were found in (**Supplemental Table S4**).

### Anxiety comorbidity assessment

#### Excluded studies

One study<sup>128</sup> was excluded since no clear information on anxiety comorbidity could be established. The analysis with anxiety comorbidity was not conducted since only two studies<sup>114,122</sup> were available.

#### Forest plots

Individual forest plots of main and subgroup analyses are shown in **Supplemental Figure S22**.

### *Caudate volume*

#### *Total caudate volume*

#### Excluded studies

Eight studies<sup>13,14,28,52,62,65,140,141</sup> reported differences in total caudate volume (TCV), one of which<sup>62</sup> also reported right (RCV) and left (LCV) volumes. Five studies<sup>37,95,114,122,128,133,142-144</sup> reported differences in RCV and LCV, from which TCV was derived according to Supplemental Methods. Three studies<sup>14,52,65</sup> were identified as duplicates and were excluded from analyses according to Methods. Two studies<sup>13,62</sup> belonged to the same research



**Appendix 1** to Espinoza Oyarce DA, Shaw ME, Alateeq K, et al. Volumetric brain differences in clinical depression in association with anxiety: a systematic review with meta-analysis. *J Psychiatry Neurosci* 2020.

DOI: 10.1503/jpn.190156

*Online appendices are unedited and posted as supplied by the authors.*

group and reported volumes for DEP-Mix, DEP-EO and DEP-LO<sup>13</sup>; and DEP-Mix<sup>62</sup>. Given sample size, DEP-Mix in<sup>62</sup> was selected for DEP analyses, while DEP-EO and DEP-LO in<sup>13</sup> were selected for subgroup analyses. However, not enough studies were available to conduct DEP-EO/DEP-LO analyses and, therefore, this study<sup>13</sup> was not included. One study<sup>135</sup> was excluded since neither age or gender of samples could be established.

### Forest plots

Individual forest plots of main and subgroup analyses are shown in **Supplemental Figure S23**.

### Results

13 studies<sup>28,37,62,95,114,122,128,133,137,140-143</sup> reporting differences in TCV were included (n=1,686, age=46.1 years, 62.4% female). No significant differences were found. Significant heterogeneity was found with DEP (**Supplemental Table S4**).

### Anxiety comorbidity assessment

#### Excluded studies

Three studies<sup>28,128,140</sup> were excluded since no clear information on anxiety comorbidity could be established.

#### Forest plots

Individual forest plots of main and subgroup analyses are shown in **Supplemental Figure S24**.

#### Anxiety exclusion results

Six studies<sup>37,62,133,137,142,143</sup> reporting differences in TCV excluding anxiety disorders were included (n=600, age=60.2 years, 66.5% female). No significant volumetric differences were found between HC and DEP, or in subgroup analysis. Significant heterogeneity was only found in DEP-Mix analysis (**Supplemental Table S5**).

#### Anxiety comorbidity results

Four studies<sup>95,114,122,141</sup> reporting differences in TCV comorbid with anxiety disorders were included (n=836, age=38.1 years, 58.9% female). No significant differences were found between HC and DEP. Significant heterogeneity was found (**Supplemental Table S5**).

**Appendix 1** to Espinoza Oyarce DA, Shaw ME, Alateeq K, et al. Volumetric brain differences in clinical depression in association with anxiety: a systematic review with meta-analysis. *J Psychiatry Neurosci* 2020.

DOI: 10.1503/jpn.190156

*Online appendices are unedited and posted as supplied by the authors.*

### *Right caudate volume*

#### Excluded studies

No duplicates were found. One study<sup>135</sup> was excluded since neither age or gender of samples could be established.

#### Forest plots

Individual forest plots of main and subgroup analyses are shown in **Supplemental Figure S25**.

#### Results

Nine studies<sup>37,62,114,122,128,133,137,142,143</sup> reporting differences in RCV were included (n=1,241, age=47.8 years, 59.4% female). No significant differences were found (**Supplemental Table S4**).

#### Anxiety comorbidity assessment

##### Excluded studies

One study<sup>128</sup> was excluded since no clear information on anxiety comorbidity could be established. The analysis with anxiety comorbidity was not conducted since only two studies<sup>114,122</sup> were available.

##### Forest plots

Individual forest plots of main and subgroup analyses are shown in **Supplemental Figure S26**.

##### Anxiety exclusion results

Six studies<sup>37,62,133,137,142,143</sup> reporting differences in RCV excluding anxiety disorders were included (n=600, age=60.2 years, 66.5% female). No significant volumetric differences were found between HC and DEP, or in subgroup analysis (**Supplemental Table S5**).

### *Left caudate volume*

#### Excluded studies

No duplicates were found. One study<sup>135</sup> was excluded since neither age or gender of samples could be established.

**Appendix 1** to Espinoza Oyarce DA, Shaw ME, Alateeq K, et al. Volumetric brain differences in clinical depression in association with anxiety: a systematic review with meta-analysis. *J Psychiatry Neurosci* 2020.

DOI: 10.1503/jpn.190156

*Online appendices are unedited and posted as supplied by the authors.*

### Forest plots

Individual forest plots of main and subgroup analyses are shown in **Supplemental Figure S27**.

### Results

Nine studies<sup>37,62,114,122,128,133,137,142,143</sup> reporting differences in LCV were included (n=1,241, age=47.8 years, 59.4% female). No significant differences were found (**Supplemental Table S4**).

### Anxiety comorbidity assessment

#### Excluded studies

One study<sup>128</sup> was excluded since no clear information on anxiety comorbidity could be established. The analysis with anxiety comorbidity was not conducted since only two studies<sup>114,122</sup> were available.

#### Forest plots

Individual forest plots of main and subgroup analyses are shown in **Supplemental Figure S28**.

#### Anxiety exclusion results

Six studies<sup>37,62,133,137,142,143</sup> reporting differences in LCV excluding anxiety disorders were included (n=600, age=60.2 years, 66.5% female). No significant volumetric differences were found between HC and DEP, or in subgroup analysis (**Supplemental Table S5**).

### *Pallidum volume*

#### *Total pallidum volume*

### Excluded studies

Two studies<sup>95,141</sup> reported differences in total pallidum volume (TPaV). Seven studies<sup>37,114,122,128,133,137,142</sup> reported differences in right (RPaV) and left (LPaV) volumes, from which TPaV was derived according to Supplemental Methods. No duplicates were found.

**Appendix 1** to Espinoza Oyarce DA, Shaw ME, Alateeq K, et al. Volumetric brain differences in clinical depression in association with anxiety: a systematic review with meta-analysis. *J Psychiatry Neurosci* 2020.

DOI: 10.1503/jpn.190156

*Online appendices are unedited and posted as supplied by the authors.*

### Forest plots

Individual forest plots of main and subgroup analyses are shown in **Supplemental Figure S29**.

### Results

Nine studies<sup>37,95,114,122,128,133,137,141,142</sup> reporting differences in TPav were included (n=1,231, age=41.6 years, 58.8% female). No significant differences were found. Significant heterogeneity was found with DEP (**Supplemental Table S4**).

### Anxiety comorbidity assessment

#### Excluded studies

One study<sup>128</sup> was excluded since no clear information on anxiety comorbidity could be established.

#### Forest plots

Individual forest plots of main and subgroup analyses are shown in **Supplemental Figure S30**.

#### Anxiety exclusion results

Four studies<sup>37,133,142,144</sup> reporting differences in TPav excluding anxiety disorders were included (n=306, age=53.3 years, 59.2% female). No significant differences were found between HC and DEP (**Supplemental Table S5**).

#### Anxiety comorbidity results

Four studies<sup>95,114,122,141</sup> reporting differences in TPav comorbid with anxiety were included (n=836, age=38.1 years, 58.9% female). No significant differences were found between HC and DEP. Significant heterogeneity was found (**Supplemental Table S5**).

### *Right pallidum volume*

### Excluded studies

No duplicates were found.

**Appendix 1** to Espinoza Oyarce DA, Shaw ME, Alateeq K, et al. Volumetric brain differences in clinical depression in association with anxiety: a systematic review with meta-analysis. *J Psychiatry Neurosci* 2020.

DOI: 10.1503/jpn.190156

*Online appendices are unedited and posted as supplied by the authors.*

#### Forest plots

Individual forest plots of main and subgroup analyses are shown in **Supplemental Figure S31**.

#### Results

Seven studies<sup>37,114,122,128,133,137,142</sup> reporting differences in RPaV were included (n=947, age=41.8 years, 54.8% female). No significant differences were found. Significant heterogeneity was found with DEP (**Supplemental Table S4**).

#### Anxiety comorbidity assessment

##### Excluded studies

One study<sup>128</sup> was excluded since no clear information on anxiety comorbidity could be established. The analysis with anxiety comorbidity was not conducted since only two studies<sup>114,122</sup> were available.

#### Forest plots

Individual forest plot of main analysis is shown in **Supplemental Figure S32**.

#### *Left pallidum volume*

##### Excluded studies

No duplicates were found.

#### Forest plots

Individual forest plots of main and subgroup analyses are shown in **Supplemental Figure S33**.

#### Results

Seven studies<sup>37,114,122,128,133,137,142</sup> reporting differences in LPaV were included (n=947, age=41.8 years, 54.8% female). No significant differences were found (**Supplemental Table S4**).

**Appendix 1** to Espinoza Oyarce DA, Shaw ME, Alateeq K, et al. Volumetric brain differences in clinical depression in association with anxiety: a systematic review with meta-analysis. *J Psychiatry Neurosci* 2020.

DOI: 10.1503/jpn.190156

*Online appendices are unedited and posted as supplied by the authors.*

#### Anxiety comorbidity assessment

##### Excluded studies

One study<sup>128</sup> was excluded since no clear information on anxiety comorbidity could be established. The analysis with anxiety comorbidity was not conducted since only two studies<sup>114,122</sup> were available.

##### Forest plots

Individual forest plot of main analysis is shown in **Supplemental Figure S34**.

##### Anxiety exclusion results

Four studies<sup>37,133,137,142</sup> reporting differences in LPaV excluding anxiety disorders were included (n=306, age=53.3 years, 59.2% female). No significant volumetric differences were found between HC and DEP (**Supplemental Table S5**).

##### *Thalamus volume*

##### *Total thalamus volume*

#### Excluded studies

Three studies<sup>13,14,52</sup> reported differences in total thalamus volume (TTV). Six studies<sup>37,114,122,128,133,137</sup> reported differences in right (RTV) and left (LTV) volumes, from which TTV was derived according to Supplemental Methods. One study<sup>14</sup> was identified as a duplicate and was excluded according to Methods. Two studies<sup>13,52</sup> belonged to the same group and reported multiple volumes for DEP-Mix, DEP-EO, and DEP-LO<sup>13</sup>, and separately for DEP-Mix<sup>52</sup>. Given sample size, DEP-Mix in<sup>52</sup> was selected for main analysis while DEP-EO and DEP-LO in<sup>13</sup> were selected for subgroup analysis. However, DEP-EO/DEP-LO analyses were not conducted due to low number of studies and, thus this study<sup>13</sup> was not included in TTV analyses.

#### Forest plots

Individual forest plots of main and subgroup analyses are shown in **Supplemental Figure S35**.

**Appendix 1** to Espinoza Oyarce DA, Shaw ME, Alateeq K, et al. Volumetric brain differences in clinical depression in association with anxiety: a systematic review with meta-analysis. *J Psychiatry Neurosci* 2020.

DOI: 10.1503/jpn.190156

*Online appendices are unedited and posted as supplied by the authors.*

#### Anxiety comorbidity assessment

##### Excluded studies

Three studies<sup>13,52,128</sup> were excluded since no clear information on anxiety comorbidity could be established. The analysis with anxiety comorbidity was not conducted since only two studies<sup>114,122</sup> were available.

##### Forest plots

Individual forest plot of main analysis is shown in **Supplemental Figure S36**.

#### *Right thalamus volume*

##### Excluded studies

No duplicates were found.

##### Forest plots

Individual forest plot of main analysis is shown in **Supplemental Figure S37**.

##### Results

Six studies<sup>37,114,122,128,133,144</sup> reporting differences in RTV were included (n=874, age=42.1 years, 55.6% female). No significant differences were found (**Supplemental Table S4**).

#### Anxiety comorbidity assessment

##### Excluded studies

One study<sup>128</sup> was excluded since no clear information on anxiety comorbidity could be established. The analysis comorbid with anxiety was not conducted since only two studies<sup>114,122</sup> were available.

##### Forest plots

Individual forest plot of main analysis is shown in **Supplemental Figure S38**.

**Appendix 1** to Espinoza Oyarce DA, Shaw ME, Alateeq K, et al. Volumetric brain differences in clinical depression in association with anxiety: a systematic review with meta-analysis. *J Psychiatry Neurosci* 2020.

DOI: 10.1503/jpn.190156

*Online appendices are unedited and posted as supplied by the authors.*

*Left thalamus volume*

#### Excluded studies

No duplicates were found.

#### Forest plots

Individual forest plot of main analysis is shown in **Supplemental Figure S39**.

#### Results

Six studies<sup>37,114,122,128,133,144</sup> reporting differences in LTV were included (n=874, age=42.1 years, 55.6% female). No significant differences were found (**Supplemental Table S4**).

#### Anxiety comorbidity assessment

##### Excluded studies

One study<sup>128</sup> was excluded since no clear information on anxiety comorbidity could be established. The analysis comorbid with anxiety was not conducted since only two studies<sup>114,122</sup> were available.

##### Forest plots

Individual forest plot of main analysis is shown in **Supplemental Figure S40**.

*Accumbens volume*

*Total accumbens volume*

#### Excluded studies

Two studies<sup>95,140</sup> reported differences in total accumbens volume (TAcV). Two studies<sup>19,114</sup> reported differences in right (RAcV) and left (LAcV) volumes, from which TAcV was derived according to Supplemental Methods. No duplicates were found. No analyses for RAcV and LAcV were conducted since only two studies<sup>19,114</sup> were available.



**Appendix 1** to Espinoza Oyarce DA, Shaw ME, Alateeq K, et al. Volumetric brain differences in clinical depression in association with anxiety: a systematic review with meta-analysis. *J Psychiatry Neurosci* 2020.

DOI: 10.1503/jpn.190156

*Online appendices are unedited and posted as supplied by the authors.*

#### Forest plots

Individual forest plot of main analysis is shown in **Supplemental Figure S41**.

#### Results

Four studies<sup>19,95,114,140</sup> reporting differences in TAcV were included (n=563, age=36.5 years, 61.1% female). No significant differences were found. Significant heterogeneity was found (**Supplemental Table S4**).

#### Anxiety comorbidity assessment

##### Excluded studies

Two studies<sup>19,140</sup> were excluded since no clear information on anxiety comorbidity could be established. The anxiety comorbidity assessment analyses were not conducted since only two studies two studies<sup>95,114</sup> were available.

#### *WMV*

##### Excluded studies

One study<sup>37</sup> in which total WMV could be estimated from right and left volumes was included. No duplicates were found, except for the multiple groups of DEP in one study<sup>96</sup>. The groups reported included DEP-Mix, DEP-PO and DEP-AO, and DEP-FE and DEP-ME. DEP-Mix, DEP-PO, and DEP-AO groups were segregated according to comorbidity with anxiety disorders; whereas DEP-FE and DEP-ME presented comorbidity. Given sample size, DEP-Mix with and without comorbidity were selected for main analysis as per Methods, while homogeneous groups were selected for subgroup analyses. One study<sup>77</sup> was excluded due to large variance in WMV measures.

#### Forest plots

Individual forest plots of main and subgroup analyses are shown in **Supplemental Figure S42**.

#### Results

Ten studies<sup>5,37,41,84,87,88,93,96,145,146</sup> reporting differences in WMV were included (n=1,245, age=44.5 years, 57.1% female). No significant differences were found (**Supplemental Table S4**).

**Appendix 1** to Espinoza Oyarce DA, Shaw ME, Alateeq K, et al. Volumetric brain differences in clinical depression in association with anxiety: a systematic review with meta-analysis. *J Psychiatry Neurosci* 2020.

DOI: 10.1503/jpn.190156

*Online appendices are unedited and posted as supplied by the authors.*

#### Anxiety comorbidity assessment

##### Excluded studies

Two studies<sup>84,87</sup> were excluded since no clear information on anxiety comorbidity could be established. The analysis with anxiety comorbidity was not conducted since only two studies<sup>41,96</sup> were available.

##### Forest plots

Individual forest plot of main is shown in **Supplemental Figure S43**.

##### Anxiety exclusion results

Seven studies<sup>5,37,88,93,96,145,146</sup> reporting differences in WMV excluding anxiety disorders were included (n=779, age=46.9 years, 57.8% female). No significant volumetric differences were found between HC and DEP (**Supplemental Table S5**).

#### *ICV*

##### Excluded studies

12 studies<sup>15,18,73,124,131,134,147-152</sup> were identified as duplicates and were excluded from analyses according to Methods. One study<sup>153</sup> was excluded since age of HC could not be established. One study<sup>136</sup> was excluded since age of DEP could not be established. One study<sup>85</sup> included both major (MDD) and minor depression disorder groups, but only MDD group was selected. Two studies<sup>76,77</sup> were excluded due to large variance of ICV measures. DEP-Cur in one study<sup>15</sup> was excluded due to large variance of ICV measures.

##### Forest plots

Individual forest plots of main and subgroup analyses are shown in **Supplemental Figure S44**.

#### Anxiety comorbidity assessment

##### Excluded studies

11 studies<sup>28,30,48,54,83,85,101,105,108,154,155</sup> were excluded since no clear information on anxiety comorbidity could be established.

**Appendix 1** to Espinoza Oyarce DA, Shaw ME, Alateeq K, et al. Volumetric brain differences in clinical depression in association with anxiety: a systematic review with meta-analysis. *J Psychiatry Neurosci* 2020.

DOI: 10.1503/jpn.190156

*Online appendices are unedited and posted as supplied by the authors.*

Forest plots

Individual forest plots of main and subgroup analyses are shown in **Supplemental Figure S45**.

Anxiety comorbidity results

Nine studies<sup>46,58,102,114,123,129,130,156,157</sup> with comorbid anxiety disorders were included (n=654, age=39.1 years, 61.9% female). No significant volumetric differences were found between HC and DEP, or in subgroup analyses (**Supplemental Table S5**).

## **Sensitivity analyses**

### *Assessment of subgroup selection*

A number of studies reported volumes for both DEP-Mix and homogeneous groups of depressives. Following exclusion of duplicates according to Methods, homogeneous groups were selected in DEP meta-analyses to provide an accurate representation of volumetric differences. The following analyses assess the effect of DEP-Mix exclusion in DEP meta-analyses in TBV, HcV, and ICV.

### TBV

DEP analysis

Two studies<sup>80,86</sup> reported volumes for DEP-Mix, and separately for DEP-EO and DEP-LO. No significant volumetric difference was found. Furthermore, no significant differences were found between main and sensitivity analysis (**Supplemental Table S6**).

DEP no ANX analysis

Two studies<sup>80,86</sup> excluding anxiety disorders reported volumes for DEP-Mix, and separately for DEP-EO and DEP-LO. No significant volumetric difference was found. Furthermore, no significant differences were found between main and sensitivity analysis (**Supplemental Table S7**).

**Appendix 1** to Espinoza Oyarce DA, Shaw ME, Alateeq K, et al. Volumetric brain differences in clinical depression in association with anxiety: a systematic review with meta-analysis. *J Psychiatry Neurosci* 2020.

DOI: 10.1503/jpn.190156

*Online appendices are unedited and posted as supplied by the authors.*

#### Total hippocampus volume

##### DEP analysis

Two studies<sup>80,86</sup> reported volumes for DEP-Mix, and separately for DEP-EO and DEP-LO. Two studies<sup>49,107</sup> reported volumes for DEP-Mix, and separately for DEP-FE and DEP-ME. One study<sup>103</sup> reported volumes for DEP-Mix, and separately for DEP-TR and DEP-noTR. One study<sup>105</sup> reported volumes for DEP-Cur, and separately for DEP-Med and DEP-noMed. Significant volumetric differences were found, similar to main analysis. Furthermore, no significant differences were found between main and sensitivity analyses (**Supplemental Table S6**).

##### DEP no ANX analysis

Two studies<sup>80,86</sup> reported volumes for DEP-Mix, and separately for DEP-EO and DEP-LO. Two studies<sup>49,107</sup> reported volumes for DEP-Mix, and separately for DEP-FE and DEP-ME. One study<sup>103</sup> reported volumes for DEP-Mix, and separately for DEP-TR and DEP-noTR. Significant volumetric differences were found, similar to main analysis. Furthermore, no significant differences were found between main and sensitivity analyses (**Supplemental Table S7**).

#### Right hippocampus volume

##### DEP analysis

Two studies<sup>80,86</sup> reported volumes for DEP-Mix, and separately for DEP-EO and DEP-LO. Two studies<sup>49,107</sup> reported volumes for DEP-Mix, and separately for DEP-FE and DEP-ME. Significant volumetric differences were found, similar to main analysis. Furthermore, no significant differences were found between main and sensitivity analyses (**Supplemental Table S6**).

##### DEP no ANX analysis

Two studies<sup>80,86</sup> reported volumes for DEP-Mix, and separately for DEP-EO and DEP-LO. Two studies<sup>49,107</sup> reported volumes for DEP-Mix, and separately for DEP-FE and DEP-ME. Significant volumetric differences were found, similar to main analysis. Furthermore, no significant differences were found between main and sensitivity analyses (**Supplemental Table S7**).

**Appendix 1** to Espinoza Oyarce DA, Shaw ME, Alateeq K, et al. Volumetric brain differences in clinical depression in association with anxiety: a systematic review with meta-analysis. *J Psychiatry Neurosci* 2020.

DOI: 10.1503/jpn.190156

*Online appendices are unedited and posted as supplied by the authors.*

#### Left hippocampus volume

##### DEP analysis

Two studies<sup>80,86</sup> reported volumes for DEP-Mix, and separately for DEP-EO and DEP-LO. Two studies<sup>49,107</sup> reported volumes for DEP-Mix, and separately for DEP-FE and DEP-ME. Significant volumetric differences were found, similar to main analysis. Furthermore, no significant differences were found between main and sensitivity analyses (**Supplemental Table S6**).

##### DEP no ANX analysis

Two studies<sup>80,86</sup> reported volumes for DEP-Mix, and separately for DEP-EO and DEP-LO. Two studies<sup>49,107</sup> reported volumes for DEP-Mix, and separately for DEP-FE and DEP-ME. Significant volumetric differences were found, similar to main analysis. Furthermore, no significant differences were found between main and sensitivity analyses (**Supplemental Table S7**).

#### ICV

##### DEP analysis

One study<sup>86</sup> reported volumes for DEP-Mix, and separately for DEP-EO and DEP-LO. Two studies<sup>49,107</sup> reported volumes for DEP-Mix and separately for DEP-FE and DEP-ME. One study<sup>156</sup> reported volumes for DEP-Mix, and separately for DEP-Rem and DEP-Cur. One study<sup>158</sup> reported volumes for DEP-Mix, and separately and for DEP-noMed and DEP-Med. One study<sup>105</sup> reported volumes for DEP-Cur, and separately for DEP-noMed and DEP-Med. No significant volumetric difference was found. Furthermore, no significant differences were found between main and sensitivity analysis (**Supplemental Table S6**).

##### DEP no ANX analysis

One study<sup>86</sup> reported volumes for DEP-Mix and separately for DEP-EO and DEP-LO. Two studies<sup>49,107</sup> reported volumes for DEP-Mix and separately for DEP-FE and DEP-ME. One study<sup>158</sup> reported volumes for DEP-Mix and separately and for DEP-noMed and DEP-Med. A trend found. However, no significant differences were found between main and sensitivity analysis (**Supplemental Table S7**).

**Appendix 1** to Espinoza Oyarce DA, Shaw ME, Alateeq K, et al. Volumetric brain differences in clinical depression in association with anxiety: a systematic review with meta-analysis. *J Psychiatry Neurosci* 2020.

DOI: 10.1503/jpn.190156

*Online appendices are unedited and posted as supplied by the authors.*

DEP ANX analysis

One study<sup>156</sup> reported volumes for DEP-Mix and separately for DEP-Rem and DEP-Cur. No significant volumetric difference was found. Furthermore, no significant differences were found between main and sensitivity analysis (**Supplemental Table S7**).

### **Study influence assessment**

Disproportionate study influence in reported estimates was investigated using the leave-one-out method. Assessment was conducted in analyses that included more than ten studies in order to limit intrinsic effects in analyses with fewer included studies. Study influence only affected the significance of estimates in ICV analyses.

*TBV*

Evidence of influence was found in two analyses. In DEP analysis (k=37, studies=27), four studies<sup>41,79,84,92</sup> were identified; however, exclusion did not change significance of results. In DEP-Mix analysis (k=13, studies=12), two studies<sup>41,79</sup> were identified; however, exclusion did not change significance of results (**Supplemental Table S8**).

*GMV*

Evidence of influence was found in DEP analysis (k=19, studies=15). One study<sup>99</sup> (DEP-FE) was identified; however, exclusion did not change significance of results (**Supplemental Table S8**).

*Right hippocampus volume*

Evidence of influence was found in DEP no ANX analysis (k=25, studies=20). One study<sup>88</sup> was identified; however, exclusion did not change significance of results (**Supplemental Table S8**).

*Left hippocampus volume*

Evidence of influence was found in two analyses. In DEP analysis (k=50, studies=34), one study<sup>129</sup> was identified; however, exclusion did not change significance of results. In DEP no ANX analysis (k=25, studies=20), one study<sup>88</sup> was identified; however, exclusion did not change significance of results (**Supplemental Table S8**).

**Appendix 1** to Espinoza Oyarce DA, Shaw ME, Alateeq K, et al. Volumetric brain differences in clinical depression in association with anxiety: a systematic review with meta-analysis. *J Psychiatry Neurosci* 2020.

DOI: 10.1503/jpn.190156

*Online appendices are unedited and posted as supplied by the authors.*

#### *Total amygdala volume*

Evidence of influence was found in DEP analysis (k=25, studies=15). One study<sup>81</sup> (DEP-LO) was identified; however, exclusion did not change significance of results (**Supplemental Table S8**).

#### *Right amygdala volume*

Evidence of influence was found in DEP analysis (k=23, studies=13), One study<sup>81</sup> (DEP-LO) was identified; however, exclusion did not change significance of results (**Supplemental Table S8**).

#### *Left amygdala volume*

Evidence of influence was found in DEP analysis (k=23, studies=13), One study<sup>81</sup> (DEP-LO) was identified; however, exclusion did not change significance of results (**Supplemental Table S8**).

#### *ICV*

Evidence of influence was found in four analyses. In DEP analysis (k=59, studies=42), three studies<sup>42,49,129</sup> were identified; however, exclusions did not change the significance of results. In DEP-Mix analysis (k=25, studies=25) three studies<sup>42,49,129</sup> were identified, with individual exclusions varying the significance of results and exclusion of all identified studies showing no significant volumetric differences. In DEP no ANX analysis (k=30, studies=23) two studies<sup>42,49</sup> (DEP-Mix) were identified, with individual exclusions varying the significance of results and exclusion of all identified studies showing significant volumetric differences. In DEP-Mix no ANX analysis (k=15, studies=15) two studies<sup>42,49</sup> (DEP-Mix) were identified, with individual exclusions varying the significance of results and exclusion of all identified studies showing non-significant volumetric differences (**Supplemental Table S8**).

### **Bias assessment**

#### *TBV*

Six out of a total of 11 meta-analyses in TBV presented bias (54.5%). From the six main meta-analyses, three presented bias; while from the five meta-analyses assessing anxiety comorbidity, three presented bias. Using the fill-and-trim method, two analyses changed the significance of the presented results. Unlike initial results,

**Appendix 1** to Espinoza Oyarce DA, Shaw ME, Alateeq K, et al. Volumetric brain differences in clinical depression in association with anxiety: a systematic review with meta-analysis. *J Psychiatry Neurosci* 2020.

DOI: 10.1503/jpn.190156

*Online appendices are unedited and posted as supplied by the authors.*

significant volumetric differences were found in the analysis with DEP-LO and DEP no ANX (**Supplemental Table S9**).

#### *GMV*

One out of a total of seven meta-analyses in GMV presented bias (14.3%). From the four main meta-analyses, one presented bias; while none of the three meta-analyses assessing anxiety comorbidity presented bias. Using the trim-and-fill method, the significance of results remained unchanged (**Supplemental Table S9**).

#### *Total hippocampus volume*

Ten out of a total of 18 meta-analyses in THcV presented bias (55.6%). From the ten main meta-analyses, five presented bias; while from the eight meta-analyses assessing anxiety comorbidity, five presented bias. Using the trim-and-fill method, two analyses changed the significance of the presented results. Unlike initial results, significant volumetric differences were found with DEP-EO no ANX and DEP ANX (**Supplemental Table S9**).

#### *Right hippocampus volume*

Eight out of a total of 16 meta-analyses in RHcV presented bias (50.0%). From the eight main meta-analyses, four presented bias; while from the eight meta-analyses assessing anxiety comorbidity, four presented bias. In one of these analyses (DEP-Mix ANX), bias was only present in Egger test. Using the trim-and-fill method, two analyses changed the significance of the presented results. Unlike initial results, significant volumetric differences were found with DEP-Cur and DEP-EO no ANX, and a trend with DEP ANX (**Supplemental Table S9**).

#### *Left hippocampus volume*

Eight out of a total of 16 meta-analyses in LHcV presented bias (50.0%). From the eight main meta-analyses, four presented bias; while from the eight meta-analyses assessing anxiety comorbidity, four presented bias. Using the trim-and-fill method, only analysis changed the significance of the presented results. Unlike initial results, significant volumetric differences were found with DEP ANX (**Supplemental Table S9**).

#### *Total amygdala volume*

Three out of a total of ten meta-analyses in TAV presented bias (30.0%). From the five main meta-analyses, two presented bias; while from the five meta-analyses assessing anxiety comorbidity, one presented bias. Using the trim-and-fill method, the significance of results remained unchanged (**Supplemental Table S9**).



**Appendix 1** to Espinoza Oyarce DA, Shaw ME, Alateeq K, et al. Volumetric brain differences in clinical depression in association with anxiety: a systematic review with meta-analysis. *J Psychiatry Neurosci* 2020.

DOI: 10.1503/jpn.190156

*Online appendices are unedited and posted as supplied by the authors.*

#### *Right amygdala volume*

Five out of a total of ten meta-analyses in RAV presented bias (50.0%). From the five main meta-analyses, four presented bias; while from the five meta-analyses assessing anxiety comorbidity, one presented bias. Using the trim-and-fill method, one analysis changed the significance of the presented results. Unlike initial results, significant volumetric differences were found with DEP no ANX (**Supplemental Table S9**).

#### *Left amygdala volume*

Two out of a total of ten meta-analyses in LAV presented bias (20.0%). From the five main meta-analyses, two presented bias; while none of the meta-analyses assessing anxiety comorbidity presented bias. Using the trim-and-fill method, the significance of results remained unchanged (**Supplemental Table S9**).

#### *Total putamen volume*

Two out of a total of five meta-analyses in TPuV presented bias (40.0%). From the two main meta-analyses, one presented bias; while from the three meta-analyses assessing anxiety comorbidity, one presented bias. Using the trim-and-fill method, the significance of results remained unchanged (**Supplemental Table S9**).

#### *Right putamen volume*

Two out of a total of four meta-analyses in RPuV presented bias (50.0%). From the two main meta-analyses, none presented bias; while both meta-analyses assessing anxiety comorbidity presented bias. Using the trim-and-fill method, the significance of results remained unchanged (**Supplemental Table S9**).

#### *Left putamen volume*

Three out of a total of four meta-analyses in LPuV presented bias (75.0%). From the two main meta-analyses, one presented bias; while both meta-analyses assessing anxiety comorbidity presented bias. Using the trim-and-fill method, one analysis changed the significance of the presented results. Unlike initial results, no significant volumetric differences were found with DEP no ANX (**Supplemental Table S9**).

#### *Total caudate volume*

Two out of a total of five meta-analyses in TCV presented bias (40.0%). From the two main meta-analyses, one presented bias; while from the three meta-analyses assessing anxiety comorbidity, one presented bias. Using the

**Appendix 1** to Espinoza Oyarce DA, Shaw ME, Alateeq K, et al. Volumetric brain differences in clinical depression in association with anxiety: a systematic review with meta-analysis. *J Psychiatry Neurosci* 2020.

DOI: 10.1503/jpn.190156

*Online appendices are unedited and posted as supplied by the authors.*

trim-and-fill method, one analysis changed the significance of the presented results. Unlike initial results, significant volumetric differences were found with DEP-Mix (**Supplemental Table S9**).

#### *Right caudate volume*

Three out of a total of four meta-analyses in RCV presented bias (75.0%). From the two main meta-analyses, one presented bias; while both meta-analyses assessing anxiety comorbidity presented bias. Using the trim-and-fill method, the significance of results remained unchanged (**Supplemental Table S9**).

#### *Left caudate volume*

Three out of a total of four meta-analyses in LCV presented bias (75.0%). From the two main meta-analyses, one presented bias; while both meta-analyses assessing anxiety comorbidity presented bias. Using the trim-and-fill method, one analysis changed the significance of the presented results. Unlike initial results, significant volumetric differences were found with DEP no ANX (**Supplemental Table S9**).

#### *Total pallidum volume*

Three out of a total of four meta-analyses in TPaV presented bias (75.0%). Both main meta-analyses presented bias; while from the two meta-analyses assessing anxiety comorbidity, one presented bias. Using the trim-and-fill method, the significance of results remained unchanged (**Supplemental Table S9**).

#### *Right pallidum volume*

All meta-analyses in RPaV presented bias (100.0%). Using the trim-and-fill method, one analysis changed the significance of the presented results. Unlike initial result, significant differences were found with DEP-Mix (**Supplemental Table S9**).

#### *Left pallidum volume*

All meta-analyses in LPaV presented bias (100.0%). Using the trim-and-fill method, the significance of results remained unchanged (**Supplemental Table S9**).

**Appendix 1** to Espinoza Oyarce DA, Shaw ME, Alateeq K, et al. Volumetric brain differences in clinical depression in association with anxiety: a systematic review with meta-analysis. *J Psychiatry Neurosci* 2020.

DOI: 10.1503/jpn.190156

*Online appendices are unedited and posted as supplied by the authors.*

#### *Right thalamus volume*

One out of a total of two meta-analyses in RTV presented bias (50.0%). The only meta-analysis assessing anxiety comorbidity presented bias. Using the trim-and-fill method, the significance of results remained unchanged (**Supplemental Table S9**).

#### *Total accumbens volume*

The only meta-analysis in TAcV presented bias (100.0%). Using the trim-and-fill method, the significance of results remained unchanged (**Supplemental Table S9**).

#### *WMV*

Three out of a total of four meta-analyses in WMV presented bias (75.0%). From the three main meta-analyses, two presented bias; while the only meta-analysis assessing anxiety comorbidity presented bias. Using the trim-and-fill method, the significance of results remained unchanged (**Supplemental Table S9**).

#### *ICV*

Nine out of a total of 18 meta-analyses in ICV presented bias (50.0%). From the 11 main meta-analyses, seven presented bias; while from the seven meta-analyses assessing anxiety comorbidity, two presented bias. Using the trim-and-fill method, one analysis changed the significance of the presented results. Unlike initial results, significant volumetric differences were found with DEP-Mix no ANX, and a trend with DEP-Rem (**Supplemental Table S9**).

### **Meta-regression**

Although a trend was reported with age in RHcV, neither variable in isolation or as part of a model could significantly account for the observed heterogeneity in TBV, and HcV analyses ( $QMp > 0.05$ ). Similar results were found with segmentation procedure, depressive symptoms, and medication status in HcV. Furthermore, the test for residual heterogeneity in these meta-regressions suggested that other moderators may influence observed outcomes measures ( $QE-p < 0.0001$ ) (**Supplemental Table S10**).

The effect of gender, as the difference between the percent female in HC and DEP, was found to be significant in ICV. The effect of gender accounted for 22.4% of the observed variance in ICV ( $QMp = 0.0325$ ), with no evidence of other moderators influencing this measure ( $QE-p > 0.05$ ) (**Supplemental Table S10**).

**Appendix 1** to Espinoza Oyarce DA, Shaw ME, Alateeq K, et al. Volumetric brain differences in clinical depression in association with anxiety: a systematic review with meta-analysis. *J Psychiatry Neurosci* 2020.

DOI: 10.1503/jpn.190156

Online appendices are unedited and posted as supplied by the authors.

## References

1. Folstein MF, Folstein SE, McHugh PR. "Mini-mental state". A practical method for grading the cognitive state of patients for the clinician. *J Psychiatr Res* 1975; **12**(3): 189-98.
2. Wells GA, Shea B, O'Connell D, et al. The Newcastle-Ottawa Scale (NOS) for assessing the quality of nonrandomised studies in meta-analyses. 2014. [http://www.ohri.ca/programs/clinical\\_epidemiology/oxford.asp](http://www.ohri.ca/programs/clinical_epidemiology/oxford.asp) (accessed Aug 2017).
3. Brambilla P, Hardan A, di Nemi SU, et al. Brain anatomy and development in autism: review of structural MRI studies. *Brain Res Bull* 2003; **61**(6): 557-69.
4. Shepherd AM, Matheson SL, Laurens KR, et al. Systematic meta-analysis of insula volume in schizophrenia. *Biol Psychiatry* 2012; **72**(9): 775-84.
5. Frodl T, Meisenzahl E, Zetzsche T, et al. Enlargement of the amygdala in patients with a first episode of major depression. *Biol Psychiatry* 2002; **51**(9): 708-14.
6. Frodl T, Meisenzahl EM, Zetzsche T, et al. Larger amygdala volumes in first depressive episode as compared to recurrent major depression and healthy control subjects. *Biol Psychiatry* 2003; **53**(4): 338-44.
7. Caetano SC, Sassi R, Brambilla P, et al. MRI study of thalamic volumes in bipolar and unipolar patients and healthy individuals. *Psychiatry Res* 2001; **108**(3): 161-8.
8. Frodl T, Meisenzahl EM, Zill P, et al. Reduced hippocampal volumes associated with the long variant of the serotonin transporter polymorphism in major depression. *Arch Gen Psychiatry* 2004; **61**(2): 177-83.
9. Wagner G, Koch K, Schachtzabel C, et al. Structural brain alterations in patients with major depressive disorder and high risk for suicide: evidence for a distinct neurobiological entity? *Neuroimage* 2011; **54**(2): 1607-14.
10. Bergouignan L, Chupin M, Czechowska Y, et al. Can voxel based morphometry, manual segmentation and automated segmentation equally detect hippocampal volume differences in acute depression? *Neuroimage* 2009; **45**(1): 29-37.
11. Caetano SC, Hatch JP, Brambilla P, et al. Anatomical MRI study of hippocampus and amygdala in patients with current and remitted major depression. *Psychiatry Res* 2004; **132**(2): 141-7.
12. Exner C, Lange C, Irle E. Impaired implicit learning and reduced pre-supplementary motor cortex size in early-onset major depression with melancholic features. *J Affect Disord* 2009; **119**(1-3): 156-62.
13. Krishnan KR, McDonald WM, Doraiswamy PM, et al. Neuroanatomical substrates of depression in the elderly. *Eur Arch Psychiatry Clin Neurosci* 1993; **243**(1): 41-6.
14. Lisanby SH, McDonald WM, Massey EW, et al. Diminished subcortical nuclei volumes in Parkinson's disease by MR imaging. *J Neural Transm Suppl* 1993; **40**: 13-21.
15. Lorenzetti V, Allen NB, Fornito A, et al. Pituitary gland volume in currently depressed and remitted depressed patients. *Psychiatry Res* 2009; **172**(1): 55-60.
16. Penttila J, Paillere-Martinot ML, Martinot JL, et al. Cortical folding in patients with bipolar disorder or unipolar depression. *J Psychiatry Neurosci* 2009; **34**(2): 127-35.
17. Sheline YI, Gado MH, Kraemer HC. Untreated depression and hippocampal volume loss. *Am J Psychiatry* 2003; **160**(8): 1516-8.
18. Tae WS, Kim SS, Lee KU, et al. Validation of hippocampal volumes measured using a manual method and two automated methods (FreeSurfer and IBASPM) in chronic major depressive disorder. *Neuroradiology* 2008; **50**(7): 569-81.
19. Abdallah CG, Jackowski A, Salas R, et al. The Nucleus Accumbens and Ketamine Treatment in Major Depressive Disorder. *Neuropsychopharmacology* 2017; **42**(8): 1739-46.
20. Jessen F, Schuhmacher A, von Widdern O, et al. No association of the Val66Met polymorphism of the brain-derived neurotrophic factor with hippocampal volume in major depression. *Psychiatr Genet* 2009; **19**(2): 99-101.
21. Miller DS, Kumar A, Yousem DM, et al. MRI High-Intensity Signals in Late-Life Depression and Alzheimer's Disease: A Comparison of Subjects Without Major Vascular Risk Factors. *Am J Geriatr Psychiatry* 1994; **2**(4): 332-7.
22. Milne A, MacQueen GM, Yucel K, et al. Hippocampal metabolic abnormalities at first onset and with recurrent episodes of a major depressive disorder: a proton magnetic resonance spectroscopy study. *Neuroimage* 2009; **47**(1): 36-41.
23. Tupler LA, Krishnan KR, McDonald WM, et al. Anatomic location and laterality of MRI signal hyperintensities in late-life depression. *J Psychosom Res* 2002; **53**(2): 665-76.

*Online appendices are unedited and posted as supplied by the authors.*

24. Zubenko GS, Sullivan P, Nelson JP, et al. Brain imaging abnormalities in mental disorders of late life. *Arch Neurol* 1990; **47**(10): 1107-11.
25. Hamilton JP, Siemer M, Gotlib IH. Amygdala volume in major depressive disorder: a meta-analysis of magnetic resonance imaging studies. *Mol Psychiatry* 2008; **13**(11): 993-1000.
26. Kempton MJ, Salvador Z, Munafo MR, et al. Structural neuroimaging studies in major depressive disorder. Meta-analysis and comparison with bipolar disorder. *Arch Gen Psychiatry* 2011; **68**(7): 675-90.
27. McKinnon MC, Yucel K, Nazarov A, et al. A meta-analysis examining clinical predictors of hippocampal volume in patients with major depressive disorder. *J Psychiatry Neurosci* 2009; **34**(1): 41-54.
28. Hickie IB, Naismith SL, Ward PB, et al. Serotonin transporter gene status predicts caudate nucleus but not amygdala or hippocampal volumes in older persons with major depression. *J Affect Disord* 2007; **98**(1-2): 137-42.
29. Naismith S, Hickie I, Ward PB, et al. Caudate nucleus volumes and genetic determinants of homocysteine metabolism in the prediction of psychomotor speed in older persons with depression. *Am J Psychiatry* 2002; **159**(12): 2096-8.
30. Saylam C, Ucerler H, Kitis O, et al. Reduced hippocampal volume in drug-free depressed patients. *Surg Radiol Anat* 2006; **28**(1): 82-7.
31. Ahdidan J, Foldager L, Rosenberg R, et al. Hippocampal volume and serotonin transporter polymorphism in major depressive disorder. *Acta Neuropsychiatr* 2013; **25**(4): 206-14.
32. Ashtari M, Greenwald BS, Kramer-Ginsberg E, et al. Hippocampal/amygdala volumes in geriatric depression. *Psychol Med* 1999; **29**(3): 629-38.
33. Eker MC, Kitis O, Okur H, et al. Smaller hippocampus volume is associated with short variant of 5-HTTLPR polymorphism in medication-free major depressive disorder patients. *Neuropsychobiology* 2011; **63**(1): 22-8.
34. Elderkin-Thompson V, Ballmaier M, Hellemann G, et al. Daily functioning and prefrontal brain morphology in healthy and depressed community-dwelling elderly. *Am J Geriatr Psychiatry* 2008; **16**(8): 633-42.
35. Lavretsky H, Ballmaier M, Pham D, et al. Neuroanatomical characteristics of geriatric apathy and depression: a magnetic resonance imaging study. *Am J Geriatr Psychiatry* 2007; **15**(5): 386-94.
36. Lenze SN, Xiong C, Sheline YI. Childhood adversity predicts earlier onset of major depression but not reduced hippocampal volume. *Psychiatry Res* 2008; **162**(1): 39-49.
37. Lim HK, Jung WS, Ahn KJ, et al. Regional cortical thickness and subcortical volume changes are associated with cognitive impairments in the drug-naive patients with late-onset depression. *Neuropsychopharmacology* 2012; **37**(3): 838-49.
38. Pan CC, McQuoid DR, Taylor WD, et al. Association analysis of the COMT/MTHFR genes and geriatric depression: An MRI study of the putamen. *Int J Geriatr Psychiatry* 2009; **24**(8): 847-55.
39. Posener JA, Wang L, Price JL, et al. High-dimensional mapping of the hippocampus in depression. *Am J Psychiatry* 2003; **160**(1): 83-9.
40. Sivakumar PT, Kalmady SV, Venkatasubramanian G, et al. Volumetric analysis of hippocampal subregions in late onset depression: a 3 tesla magnetic resonance imaging study. *Asian J Psychiatr* 2015; **13**: 38-43.
41. Stratmann M, Konrad C, Kugel H, et al. Insular and hippocampal gray matter volume reductions in patients with major depressive disorder. *PLoS One* 2014; **9**(7): e102692.
42. Taylor WD, Macfall JR, Payne ME, et al. Orbitofrontal cortex volume in late life depression: influence of hyperintense lesions and genetic polymorphisms. *Psychol Med* 2007; **37**(12): 1763-73.
43. Taylor WD, McQuoid DR, Payne ME, et al. Hippocampus atrophy and the longitudinal course of late-life depression. *Am J Geriatr Psychiatry* 2014; **22**(12): 1504-12.
44. Taylor WD, Steffens DC, Payne ME, et al. Influence of serotonin transporter promoter region polymorphisms on hippocampal volumes in late-life depression. *Arch Gen Psychiatry* 2005; **62**(5): 537-44.
45. Vasic N, Wolf ND, Gron G, et al. Baseline brain perfusion and brain structure in patients with major depression: A multimodal magnetic resonance imaging study. *J Psychiatry Neurosci* 2015; **40**(6): 412-21.
46. Weniger G, Lange C, Irle E. Abnormal size of the amygdala predicts impaired emotional memory in major depressive disorder. *J Affect Disord* 2006; **94**(1-3): 219-29.
47. Zavorotnyy M, Zollner R, Schulte-Gustenberg L, et al. Low left amygdala volume is associated with a longer duration of unipolar depression. *J Neural Transm (Vienna)* 2018; **125**(2): 229-38.
48. Lavretsky H, Roybal DJ, Ballmaier M, et al. Antidepressant exposure may protect against decrement in frontal gray matter volumes in geriatric depression. *J Clin Psychiatry* 2005; **66**(8): 964-7.

**Appendix 1** to Espinoza Oyarce DA, Shaw ME, Alateeq K, et al. Volumetric brain differences in clinical depression in association with anxiety: a systematic review with meta-analysis. *J Psychiatry Neurosci* 2020.

DOI: 10.1503/jpn.190156

*Online appendices are unedited and posted as supplied by the authors.*

49. Meisenzahl EM, Seifert D, Bottlender R, et al. Differences in hippocampal volume between major depression and schizophrenia: A comparative neuroimaging study. *Eur Arch Psychiatry Clin Neurosci* 2010; **260**(2): 127-37.
50. Almeida OP, Burton EJ, Ferrier N, et al. Depression with late onset is associated with right frontal lobe atrophy. *Psychol Med* 2003; **33**(4): 675-81.
51. Kumar A, Bilker W, Jin Z, et al. Atrophy and high intensity lesions: complementary neurobiological mechanisms in late-life major depression. *Neuropsychopharmacology* 2000; **22**(3): 264-74.
52. Parashos IA, Tupler LA, Blitchington T, et al. Magnetic-resonance morphometry in patients with major depression. *Psychiatry Res* 1998; **84**(1): 7-15.
53. Ballmaier M, Toga AW, Blanton RE, et al. Anterior cingulate, gyrus rectus, and orbitofrontal abnormalities in elderly depressed patients: an MRI-based parcellation of the prefrontal cortex. *Am J Psychiatry* 2004; **161**(1): 99-108.
54. Janssen J, Hulshoff Pol HE, Lampe IK, et al. Hippocampal changes and white matter lesions in early-onset depression. *Biol Psychiatry* 2004; **56**(11): 825-31.
55. Lacerda AL, Keshavan MS, Hardan AY, et al. Anatomic evaluation of the orbitofrontal cortex in major depressive disorder. *Biological Psychiatry* 2004; **55**(4): 353-8.
56. Caetano SC, Kaur S, Brambilla P, et al. Smaller cingulate volumes in unipolar depressed patients. *Biological Psychiatry* 2006; **59**(8): 702-6.
57. Frodl T, Jager M, Born C, et al. Anterior cingulate cortex does not differ between patients with major depression and healthy controls, but relatively large anterior cingulate cortex predicts a good clinical course. *Psychiatry Res Neuroimaging* 2008; **163**(1): 76-83.
58. Bijanki KR, Hodis B, Brumm MC, et al. Hippocampal and left subcallosal anterior cingulate atrophy in psychotic depression. *PLoS One* 2014; **9**(10): e110770.
59. Yucel K, McKinnon MC, Chahal R, et al. Anterior cingulate volumes in never-treated patients with major depressive disorder. *Neuropsychopharmacology* 2008; **33**(13): 3157-63.
60. Axelson DA, Doraiswamy PM, McDonald WM, et al. Hypercortisolemia and hippocampal changes in depression. *Psychiatry Res* 1993; **47**(2): 163-73.
61. Chang C-C, Yu S-C, McQuoid DR, et al. Reduction of dorsolateral prefrontal cortex gray matter in late-life depression. *Psychiatry Res Neuroimaging* 2011; **193**(1): 1-6.
62. Hannestad J, Taylor WD, McQuoid DR, et al. White matter lesion volumes and caudate volumes in late-life depression. *Int J Geriatr Psychiatry* 2006; **21**(12): 1193-8.
63. Kohler S, Ashton CH, Marsh R, et al. Electrophysiological changes in late life depression and their relation to structural brain changes. *Int Psychogeriatr* 2011; **23**(1): 141-8.
64. Kohler S, Thomas AJ, Lloyd A, et al. White matter hyperintensities, cortisol levels, brain atrophy and continuing cognitive deficits in late-life depression. *Br J Psychiatry* 2010; **196**(2): 143-9.
65. Krishnan KRR, McDonald WM, Escalona PR, et al. Magnetic Resonance Imaging of the Caudate Nuclei in Depression: Preliminary Observations. *Arch Gen Psychiatry* 1992; **49**(7): 553-7.
66. Kumar A, Miller D, Ewbank D, et al. Quantitative anatomic measures and comorbid medical illness in late-life major depression. *Am J Geriatr Psychiatry* 1997; **5**(1): 15-25.
67. Lee S-H, Payne ME, Steffens DC, et al. Subcortical lesion severity and orbitofrontal cortex volume in geriatric depression. *Biol Psychiatry* 2003; **54**(5): 529-33.
68. Qiu A, Taylor WD, Zhao Z, et al. APOE related hippocampal shape alteration in geriatric depression. *Neuroimage* 2009; **44**(3): 620-6.
69. Sheline YI, Gado MH, Price JL. Amygdala core nuclei volumes are decreased in recurrent major depression. [Erratum appears in *Neuroreport* 1998 Jul 13;9(10):2436]. *Neuroreport* 1998; **9**(9): 2023-8.
70. Sheline YI, Sanghavi M, Mintun MA, et al. Depression duration but not age predicts hippocampal volume loss in medically healthy women with recurrent major depression. *J Neurosci* 1999; **19**(12): 5034-43.
71. Steffens DC, McQuoid DR, Payne ME, et al. Change in hippocampal volume on magnetic resonance imaging and cognitive decline among older depressed and nondepressed subjects in the neurocognitive outcomes of depression in the elderly study. *Am J Geriatr Psychiatry* 2011; **19**(1): 4-12.
72. Steffens DC, McQuoid DR, Welsh-Bohmer KA, et al. Left orbital frontal cortex volume and performance on the benton visual retention test in older depressives and controls. *Neuropsychopharmacology* 2003; **28**(12): 2179-83.
73. Lorenzetti V, Allen NB, Whittle S, et al. Amygdala volumes in a sample of current depressed and remitted depressed patients and healthy controls. *J Affect Disord* 2010; **120**(1-3): 112-9.

*Online appendices are unedited and posted as supplied by the authors.*

74. O'Brien JT, Lloyd A, McKeith I, et al. A longitudinal study of hippocampal volume, cortisol levels, and cognition in older depressed subjects. *Am J Psychiatry* 2004; **161**(11): 2081-90.
75. Benjamin S, McQuoid DR, Potter GG, et al. The brain-derived neurotrophic factor Val66Met polymorphism, hippocampal volume, and cognitive function in geriatric depression. *Am J Geriatr Psychiatry* 2010; **18**(4): 323-31.
76. Furtado CP, Maller JJ, Fitzgerald PB. A magnetic resonance imaging study of the entorhinal cortex in treatment-resistant depression. *Psychiatry Res* 2008; **163**(2): 133-42.
77. Maller JJ, Daskalakis ZJ, Fitzgerald PB. Hippocampal volumetrics in depression: the importance of the posterior tail. *Hippocampus* 2007; **17**(11): 1023-7.
78. Janssen J, Hulshoff Pol HE, de Leeuw FE, et al. Hippocampal volume and subcortical white matter lesions in late life depression: comparison of early and late onset depression. *J Neurol Neurosurg Psychiatry* 2007; **78**(6): 638-40.
79. Andreescu C, Butters MA, Begley A, et al. Gray matter changes in late life depression-A structural MRI analysis. *Neuropsychopharmacology* 2008; **33**(11): 2566-72.
80. Ballmaier M, Narr KL, Toga AW, et al. Hippocampal morphology and distinguishing late-onset from early-onset elderly depression. *Am J Psychiatry* 2008; **165**(2): 229-37.
81. Burke J, McQuoid DR, Payne ME, et al. Amygdala volume in late-life depression: relationship with age of onset. *Am J Geriatr Psychiatry* 2011; **19**(9): 771-6.
82. Cohen JD, Nichols T, Keller J, et al. Insular cortex abnormalities in psychotic major depression: relationship to gender and psychotic symptoms. *Neurosci Res* 2013; **75**(4): 331-9.
83. Colloby SJ, Vasudev A, O'Brien JT, et al. Relationship of orthostatic blood pressure to white matter hyperintensities and subcortical volumes in late-life depression. *Br J Psychiatry* 2011; **199**(5): 404-10.
84. Devantier TA, Norgaard BL, Poulsen MK, et al. White matter lesions, carotid and coronary atherosclerosis in late-onset depression and healthy controls. *Psychosomatics* 2016; **57**(4): 369-77.
85. Kumar A, Jin Z, Bilker W, et al. Late-onset minor and major depression: early evidence for common neuroanatomical substrates detected by using MRI. *Proc Natl Acad Sci U S A* 1998; **95**(13): 7654-8.
86. Lloyd AJ, Ferrier IN, Barber R, et al. Hippocampal volume change in depression: late- and early-onset illness compared. *Br J Psychiatry* 2004; **184**: 488-95.
87. Machino A, Kunisato Y, Matsumoto T, et al. Possible involvement of rumination in gray matter abnormalities in persistent symptoms of major depression: an exploratory magnetic resonance imaging voxel-based morphometry study. *J Affect Disord* 2014; **168**: 229-35.
88. Maller JJ, Daskalakis ZJ, Thomson RH, et al. Hippocampal volumetrics in treatment-resistant depression and schizophrenia: the devil's in de-tail. *Hippocampus* 2012; **22**(1): 9-16.
89. Ozalay O, Calli C, Kitis O, et al. The relationship between the anterior corpus callosum size and prefrontal cortex volume in drug-free depressed patients. *J Affect Disord* 2013; **146**(2): 281-5.
90. Ozalay O, Aksoy B, Tunay S, et al. Cortical thickness and VBM in young women at risk for familial depression and their depressed mothers with positive family history.[Erratum appears in *Psychiatry Res Neuroimaging*. 2016 Oct 30;256:70 Note: Chandhoki, Swati [corrected to Chandhoke, Swati]; PMID: 27617885]. *Psychiatry Res Neuroimaging* 2016; **252**: 1-9.
91. Savitz JB, Nugent AC, Bogers W, et al. Habenula volume in bipolar disorder and major depressive disorder: A high-resolution magnetic resonance imaging study. *Biol Psychiatry* 2011; **69**(4): 336-43.
92. Sawyer K, Corsentino E, Sachs-Ericsson N, et al. Depression, hippocampal volume changes, and cognitive decline in a clinical sample of older depressed outpatients and non-depressed controls. *Aging Ment Health* 2012; **16**(6): 753-62.
93. van Eijndhoven P, van Wingen G, van Oijen K, et al. Amygdala volume marks the acute state in the early course of depression. *Biol Psychiatry* 2009; **65**(9): 812-8.
94. Schmidt FM, Schindler S, Adamidis M, et al. Habenula volume increases with disease severity in unmedicated major depressive disorder as revealed by 7T MRI. *Eur Arch Psychiatry Clin Neurosci* 2017; **267**(2): 107-15.
95. Sacchet MD, Camacho MC, Livermore EE, et al. Accelerated aging of the putamen in patients with major depressive disorder. *J Psychiatry Neurosci* 2017; **42**(3): 164-71.
96. van Tol M-J, van der Wee NJ, van den Heuvel OA, et al. Regional brain volume in depression and anxiety disorders. *Arch Gen Psychiatry* 2010; **67**(10): 1002-11.
97. Cardoner N, Soriano-Mas C, Pujol J, et al. Brain structural correlates of depressive comorbidity in obsessive-compulsive disorder. *Neuroimage* 2007; **38**(3): 413-21.

*Online appendices are unedited and posted as supplied by the authors.*

98. Ribeiz SRI, Duran F, Oliveira MC, et al. Structural brain changes as biomarkers and outcome predictors in patients with late-life depression: A cross-sectional and prospective study. *PLoS One* 2013; **8**(11).
99. Yang S, Cheng Y, Mo Y, et al. Childhood maltreatment is associated with gray matter volume abnormalities in patients with first-episode depression. *Psychiatry Res Neuroimaging* 2017; **268**: 27-34.
100. Kronmuller K-T, Schroder J, Kohler S, et al. Hippocampal volume in first episode and recurrent depression. *Psychiatry Res Neuroimaging* 2009; **174**(1): 62-6.
101. Savitz J, Drevets WC, Smith CM, et al. Putative neuroprotective and neurotoxic kynurenine pathway metabolites are associated with hippocampal and amygdalar volumes in subjects with major depressive disorder. *Neuropsychopharmacology* 2015; **40**(2): 463-71.
102. Wolkowitz OM, Mellon SH, Lindqvist D, et al. PBMC telomerase activity, but not leukocyte telomere length, correlates with hippocampal volume in major depression. *Psychiatry Res* 2015; **232**(1): 58-64.
103. Abdallah CG, Jackowski A, Sato JR, et al. Prefrontal cortical GABA abnormalities are associated with reduced hippocampal volume in major depressive disorder. *Eur Neuropsychopharmacol* 2015; **25**(8): 1082-90.
104. Kanellopoulos D, Gunning FM, Morimoto SS, et al. Hippocampal volumes and the brain-derived neurotrophic factor val66met polymorphism in geriatric major depression. *Am J Geriatr Psychiatry* 2011; **19**(1): 13-22.
105. Ota M, Sato N, Hidese S, et al. Structural differences in hippocampal subfields among schizophrenia patients, major depressive disorder patients, and healthy subjects. *Psychiatry Res Neuroimaging* 2017; **259**: 54-9.
106. Bearden CE, Thompson PM, Avedissian C, et al. Altered hippocampal morphology in unmedicated patients with major depressive illness. *ASN Neuro* 2009; **1**(4).
107. Cole J, Toga AW, Hojatkashani C, et al. Subregional hippocampal deformations in major depressive disorder. *J Affect Disord* 2010; **126**(1-2): 272-7.
108. Cole J, Weinberger DR, Mattay VS, et al. No effect of 5HTTLPR or BDNF Val66Met polymorphism on hippocampal morphology in major depression. *Genes Brain Behav* 2011; **10**(7): 756-64.
109. Eker C, Kitis O, Taneli F, et al. Correlation of serum BDNF levels with hippocampal volumes in first episode, medication-free depressed patients. *Eur Arch Psychiatry Clin Neurosci* 2010; **260**(7): 527-33.
110. Frodl T, Carballedo A, Hughes MM, et al. Reduced expression of glucocorticoid-inducible genes GILZ and SGK-1: high IL-6 levels are associated with reduced hippocampal volumes in major depressive disorder. *Transl Psychiatry* 2012; **2**: e88.
111. Frodl T, Jager M, Smajstrlova I, et al. Effect of hippocampal and amygdala volumes on clinical outcomes in major depression: A 3-year prospective magnetic resonance imaging study. *J Psychiatry Neurosci* 2008; **33**(5): 423-30.
112. Frodl T, Meisenzahl EM, Zetzsche T, et al. Hippocampal changes in patients with a first episode of major depression. *Am J Psychiatry* 2002; **159**(7): 1112-8.
113. Frodl T, Meisenzahl EM, Zetzsche T, et al. Hippocampal and amygdala changes in patients with major depressive disorder and healthy controls during a 1-year follow-up. *J Clin Psychiatry* 2004; **65**(4): 492-9.
114. Gifuni AJ, Ding Y, Olie E, et al. Subcortical nuclei volumes in suicidal behavior: nucleus accumbens may modulate the lethality of acts. *Brain Imaging Behav* 2016; **10**(1): 96-104.
115. Gonul AS, Kitis O, Eker M, et al. Association of the brain-derived neurotrophic factor Val66Met polymorphism with hippocampus volumes in drug-free depressed patients. *World J Biol Psychiatry* 2011; **12**(1-2): 110-8.
116. Greenberg DL, Payne ME, MacFall JR, et al. Hippocampal volumes and depression subtypes. *Psychiatry Res* 2008; **163**(2): 126-32.
117. Han KM, Won E, Sim Y, et al. Hippocampal subfield analysis in medication-naive female patients with major depressive disorder. *J Affect Disord* 2016; **194**: 21-9.
118. Han K-M, Choi S, Jung J, et al. Cortical thickness, cortical and subcortical volume, and white matter integrity in patients with their first episode of major depression. *J Affect Disord* 2014; **155**: 42-8.
119. Hviid LB, Ravnkilde B, Ahdidan J, et al. Hippocampal visuospatial function and volume in remitted depressed patients: an 8-year follow-up study. *J Affect Disord* 2010; **125**(1-3): 177-83.
120. Keller J, Shen L, Gomez RG, et al. Hippocampal and amygdalar volumes in psychotic and nonpsychotic unipolar depression. *Am J Psychiatry* 2008; **165**(7): 872-80.
121. Lim HK, Hong SC, Jung WS, et al. Automated hippocampal subfields segmentation in late life depression. *J Affect Disord* 2012; **143**(1-3): 253-6.
122. Nugent AC, Davis RM, Zarate CA, Jr., et al. Reduced thalamic volumes in major depressive disorder. *Psychiatry Res* 2013; **213**(3): 179-85.



*Online appendices are unedited and posted as supplied by the authors.*

123. Phillips JL, Batten LA, Tremblay P, et al. A Prospective, Longitudinal Study of the Effect of Remission on Cortical Thickness and Hippocampal Volume in Patients with Treatment-Resistant Depression. *Int J Neuropsychopharmacol* 2015; **18**(8).
124. Phillips JL, Batten LA, Tremblay P, et al. Impact of monoamine-related gene polymorphisms on hippocampal volume in treatment-resistant depression. *Acta Neuropsychiatr* 2015; **27**(6): 353-61.
125. Rusch BD, Abercrombie HC, Oakes TR, et al. Hippocampal morphometry in depressed patients and control subjects: relations to anxiety symptoms. *Biol Psychiatry* 2001; **50**(12): 960-4.
126. Steffens DC, Byrum CE, McQuoid DR, et al. Hippocampal volume in geriatric depression. *Biol Psychiatry* 2000; **48**(4): 301-9.
127. Tae WS, Kim SS, Lee KU, et al. Hippocampal shape deformation in female patients with unremitting major depressive disorder. *AJNR Am J Neuroradiol* 2011; **32**(4): 671-6.
128. Turner AD, Furey ML, Drevets WC, et al. Association between subcortical volumes and verbal memory in unmedicated depressed patients and healthy controls. *Neuropsychologia* 2012; **50**(9): 2348-55.
129. Vythilingam M, Heim C, Newport J, et al. Childhood trauma associated with smaller hippocampal volume in women with major depression. *Am J Psychiatry* 2002; **159**(12): 2072-80.
130. Vythilingam M, Vermetten E, Anderson GM, et al. Hippocampal volume, memory, and cortisol status in major depressive disorder: effects of treatment. *Biol Psychiatry* 2004; **56**(2): 101-12.
131. Zannas AS, McQuoid DR, Payne ME, et al. Negative life stress and longitudinal hippocampal volume changes in older adults with and without depression. *J Psychiatr Res* 2013; **47**(6): 829-34.
132. Zhao K, Liu H, Yan R, et al. Cortical thickness and subcortical structure volume abnormalities in patients with major depression with and without anxious symptoms. *Brain Behav* 2017; **7**(8): e00754.
133. Zhao K, Liu H, Yan R, et al. Altered patterns of association between cortical thickness and subcortical volume in patients with first episode major depressive disorder: A structural MRI study. *Psychiatry Res Neuroimaging* 2017; **260**: 16-22.
134. Zhao Z, Taylor WD, Styner M, et al. Hippocampus shape analysis and late-life depression. *PLoS One* 2008; **3**(3): e1837.
135. Saleh A, Potter GG, McQuoid DR, et al. Effects of early life stress on depression, cognitive performance and brain morphology. *Psychol Med* 2017; **47**(1): 171-81.
136. Malykhin NV, Carter R, Hegadoren KM, et al. Fronto-limbic volumetric changes in major depressive disorder. *J Affect Disord* 2012; **136**(3): 1104-13.
137. Sexton CE, Allan CL, Le Masurier M, et al. Magnetic resonance imaging in late-life depression: multimodal examination of network disruption. *Archives of General Psychiatry* 2012; **69**(7): 680-9.
138. Saleh K, Carballedo A, Lisiecka D, et al. Impact of family history and depression on amygdala volume. [Erratum appears in *Psychiatry Res*. 2014 Jun 30;222(3):176]. *Psychiatry Res* 2012; **203**(1): 24-30.
139. Husain MM, McDonald WM, Doraiswamy P, et al. A magnetic resonance imaging study of putamen nuclei in major depression. *Psychiatry Res Neuroimaging* 1991; **40**(2): 95-9.
140. Savitz J, Dantzer R, Meier TB, et al. Activation of the kynurenine pathway is associated with striatal volume in major depressive disorder. *Psychoneuroendocrinology* 2015; **62**: 54-8.
141. Dombrowski AY, Siegle GJ, Szanto K, et al. The temptation of suicide: striatal gray matter, discounting of delayed rewards, and suicide attempts in late-life depression. *Psychol Med* 2012; **42**(6): 1203-15.
142. Lacerda ALT, Nicoletti MA, Brambilla P, et al. Anatomical MRI study of basal ganglia in major depressive disorder. *Psychiatry Res Neuroimaging* 2003; **124**(3): 129-40.
143. Lenze EJ, Sheline YI. Absence of striatal volume differences between depressed subjects with no comorbid medical illness and matched comparison subjects. *Am J Psychiatry* 1999; **156**(12): 1989-91.
144. Sexton CE, Mackay CE, Ebmeier KP. A systematic review and meta-analysis of magnetic resonance imaging studies in late-life depression. *Am J Geriatr Psychiatry* 2013; **21**(2): 184-95.
145. Abe O, Yamasue H, Kasai K, et al. Voxel-based analyses of gray/white matter volume and diffusion tensor data in major depression. *Psychiatry Res Neuroimaging* 2010; **181**(1): 64-70.
146. Soriano-Mas C, Hernandez-Ribas R, Pujol J, et al. Cross-sectional and longitudinal assessment of structural brain alterations in melancholic depression. *Biol Psychiatry* 2011; **69**(4): 318-25.
147. Frodl T, Schaub A, Banac S, et al. Reduced hippocampal volume correlates with executive dysfunctioning in major depression. *J Psychiatry Neurosci* 2006; **31**(5): 316-25.
148. Lavretsky H, Kurbanyan K, Ballmaier M, et al. Sex differences in brain structure in geriatric depression. *Am J Geriatr Psychiatry* 2004; **12**(6): 653-7.
149. Sun J, Maller JJ, Daskalakis ZJ, et al. Morphology of the corpus callosum in treatment-resistant schizophrenia and major depression. *Acta Psychiatr Scand* 2009; **120**(4): 265-73.

**Appendix 1** to Espinoza Oyarce DA, Shaw ME, Alateeq K, et al. Volumetric brain differences in clinical depression in association with anxiety: a systematic review with meta-analysis. *J Psychiatry Neurosci* 2020.

DOI: 10.1503/jpn.190156

*Online appendices are unedited and posted as supplied by the authors.*

150. Takahashi T, Yücel M, Lorenzetti V, et al. Volumetric MRI study of the insular cortex in individuals with current and past major depression. *J Affect Disord* 2010; **121**(3): 231-8.
151. Takahashi T, Yücel M, Lorenzetti V, et al. An MRI study of the superior temporal subregions in patients with current and past major depression. *Prog Neuropsychopharmacol Biol Psychiatry* 2010; **34**(1): 98-103.
152. Weber K, Giannakopoulos P, Delaloye C, et al. Personality traits, cognition and volumetric MRI changes in elderly patients with early-onset depression: a 2-year follow-up study. *Psychiatry Res* 2012; **198**(1): 47-52.
153. Jaworska N, Yücel K, Courtright A, et al. Subgenual anterior cingulate cortex and hippocampal volumes in depressed youth: The role of comorbidity and age. *J Affect Disord* 2016; **190**: 726-32.
154. Carceller-Sindreu M, de Diego-Adelino J, Serra-Blasco M, et al. Volumetric MRI study of the habenula in first episode, recurrent and chronic major depression. *Eur Neuropsychopharmacol* 2015; **25**(11): 2015-21.
155. Wisse LE, Biessels GJ, Stegenga BT, et al. Major depressive episodes over the course of 7 years and hippocampal subfield volumes at 7 tesla MRI: the PREDICT-MR study. *J Affect Disord* 2015; **175**: 1-7.
156. Klauser P, Fornito A, Lorenzetti V, et al. Cortico-limbic network abnormalities in individuals with current and past major depressive disorder. *J Affect Disord* 2015; **173**: 45-52.
157. Rodriguez-Cano E, Sarro S, Monte GC, et al. Evidence for structural and functional abnormality in the subgenual anterior cingulate cortex in major depressive disorder. *Psychol Med* 2014; **44**(15): 3263-73.
158. Huang Y, Coupland NJ, Lebel R, et al. Structural changes in hippocampal subfields in major depressive disorder: A high-field magnetic resonance imaging study. *Biol Psychiatry* 2013; **74**(1): 62-8.

**Appendix 1** to Espinoza Oyarce DA, Shaw ME, Alateeq K, et al. Volumetric brain differences in clinical depression in association with anxiety: a systematic review with meta-analysis. *J Psychiatry Neurosci* 2020.

DOI: 10.1503/jpn.190156

Online appendices are unedited and posted as supplied by the authors.

**Supplemental Table S1. Modified Newcastle-Ottawa scale**

Detailed description of items included in the assessment of study quality using a modified version of the Newcastle-Ottawa scale (NOS). Items that grant a star are indicated with (★). A study can be awarded a maximum of one star in each item, except for 2a and 3b where two stars can be assigned. A maximum of ten stars can be

| 1. Selection                                                                                                                                                                                                                                                                                                                                                                                                                                                                                                                                                                                                                                                                                                                                                                                                                                                                                                                                                                                                                                                                            | 2. Comparability                                                                                                                                                                                                                                                                                                                                                     | 3. Exposure                                                                                                                                                                                                                                                                                                                                                                                                                                                                                                                                                                                                                                                                                                                                                |
|-----------------------------------------------------------------------------------------------------------------------------------------------------------------------------------------------------------------------------------------------------------------------------------------------------------------------------------------------------------------------------------------------------------------------------------------------------------------------------------------------------------------------------------------------------------------------------------------------------------------------------------------------------------------------------------------------------------------------------------------------------------------------------------------------------------------------------------------------------------------------------------------------------------------------------------------------------------------------------------------------------------------------------------------------------------------------------------------|----------------------------------------------------------------------------------------------------------------------------------------------------------------------------------------------------------------------------------------------------------------------------------------------------------------------------------------------------------------------|------------------------------------------------------------------------------------------------------------------------------------------------------------------------------------------------------------------------------------------------------------------------------------------------------------------------------------------------------------------------------------------------------------------------------------------------------------------------------------------------------------------------------------------------------------------------------------------------------------------------------------------------------------------------------------------------------------------------------------------------------------|
| <p>a. Is the case definition adequate?</p> <ul style="list-style-type: none"> <li>i. yes, independent validation based on diagnostic criteria (DSM or ICD)★</li> <li>ii. yes, based on self-report with no reference to diagnostic criteria</li> <li>iii. no description</li> </ul> <p>b. Representativeness of the cases</p> <ul style="list-style-type: none"> <li>i. consecutive or representative series of cases within hospital/clinic★</li> <li>ii. not stated, but description of source(s) of cases½★</li> <li>iii. potential for selection biases or not stated</li> </ul> <p>c. Selection of Controls</p> <ul style="list-style-type: none"> <li>i. community controls from the same area as cases★</li> <li>ii. hospital controls or controls attending clinic</li> <li>iii. no description</li> </ul> <p>d. Definition of Controls</p> <ul style="list-style-type: none"> <li>i. no history of depression or any other psychiatric disorder★</li> <li>ii. no history of depression, but other psychiatric disorders may be present</li> <li>iii. no description</li> </ul> | <p>a. Comparability of cases and controls on the basis of the design or analysis</p> <ul style="list-style-type: none"> <li>i. study controls for age and gender★ (½★ if one)</li> <li>ii. study controls for neurological disease or dementia (or &lt; 60yo)★</li> <li>iii. sample ≥60yo with no mention of control for neurological disease or dementia</li> </ul> | <p>a. Same method of ascertainment for cases and controls</p> <ul style="list-style-type: none"> <li>i. yes★</li> <li>ii. no</li> <li>iii. not stated</li> </ul> <p>b. Ascertainment of depression</p> <ul style="list-style-type: none"> <li>i. psychiatric/clinical assessment record★</li> <li>ii. structured interview blind to case/control status★</li> <li>iii. interview not blinded to case/control status</li> <li>iv. written self-report or medical record only</li> <li>v. no description</li> </ul> <p>c. Non-Response rate</p> <ul style="list-style-type: none"> <li>i. same rate for both groups (if no exclusions stated, assign star)★</li> <li>ii. non respondents described</li> <li>iii. rate different or no designation</li> </ul> |

awarded to a single study.

**Appendix 1** to Espinoza Oyarce DA, Shaw ME, Alateeq K, et al. Volumetric brain differences in clinical depression in association with anxiety: a systematic review with meta-analysis. *J Psychiatry Neurosci* 2020.  
DOI: 10.1503/jpn.190156

Online appendices are unedited and posted as supplied by the authors.

**Supplemental Table S2. Detailed demographic data of included studies**

n: total number of participants, HC: healthy controls, DEP: depressed participants, M: males, F: female/number of females, %F: percent female, SD: standard deviation, Scanner: scanner strength in Tesla (T), Mix: heterogeneous group of depressed, EO: early-onset depression, LO: late-onset depression, FE: first episode, ME: multiple episodes, noMed: not taking antidepressants, Med: taking antidepressants, TR: treatment-resistant depression, Psy: psychotic depression, Mel: melancholic depression, Rem: depression in remission, Cur: currently in depression, Sui: suicide attempt/ideation, FH: family history of depression, Abu: physical/sexual abuse, Anx: depression comorbid with anxiety.

\*Data provided by authors

†HC and DEP-Rem used in HcV analyses.

| Reference                 | n   | %F    | HC |                          |    |    |                          |    | DEP |                          | DEP subgroups |             |                          |    |             |                          | Scanner |           |               |
|---------------------------|-----|-------|----|--------------------------|----|----|--------------------------|----|-----|--------------------------|---------------|-------------|--------------------------|----|-------------|--------------------------|---------|-----------|---------------|
|                           |     |       | n  | Age (years)<br>mean (SD) | F  | n  | Age (years)<br>mean (SD) | F  | n   | Age (years)<br>mean (SD) | F             | n           | Age (years)<br>mean (SD) | F  | n           | Age (years)<br>mean (SD) |         | F         | DEP subgroups |
| Abdallah et al., 2015     | 59  | 40.7  | 26 | 37.3 (13.3)              | 14 | -- | --                       | -- | --  | --                       | 19            | 39.6 (10.9) | 6                        | 14 | 43.9 (12.3) | 4                        | noTR/TR | 3.0 T     |               |
| Abdallah et al., 2017     | 60  | 58.3  | 26 | 37.4 (15.3)              | 12 | -- | --                       | -- | --  | --                       | 34            | 41.7 (11.7) | 23                       | -- | --          | --                       | Cur     | 3.0 T     |               |
| Abe et al., 2010          | 63  | 47.6  | 42 | 48.0 (13.2)              | 20 | -- | --                       | -- | 21  | 48.1 (13.5)              | 10            | --          | --                       | -- | --          | --                       | Mix     | 1.5 T     |               |
| Ahdidan et al., 2013 (M)* | 13  | 0.0   | 9  | 35.6 (10.3)              | 0  | -- | --                       | -- | 4   | 32.0 (3.5)               | 0             | --          | --                       | -- | --          | --                       | Mix     | 1.5 T     |               |
| Ahdidan et al., 2013 (F)* | 43  | 100.0 | 24 | 37.0 (11.6)              | 24 | -- | --                       | -- | 19  | 41.0 (13.0)              | 19            | --          | --                       | -- | --          | --                       | Mix     | 1.5 T     |               |
| Almeida et al., 2003      | 88  | 77.3  | 37 | 72.9 (6.6)               | 27 | -- | --                       | -- | --  | --                       | 24            | 72.8 (6.6)  | 23                       | 27 | 75.5 (5.8)  | 18                       | EO/LO   | 1.0 T     |               |
| Andreescu et al., 2008    | 103 | 64.1  | 32 | 71.0 (6.7)               | 17 | -- | --                       | -- | 71  | 72.2 (6.2)               | 49            | --          | --                       | -- | --          | --                       | Mix     | 1.5 T     |               |
| Arnone et al., 2013       | 130 | 71.5  | 66 | 32.1 (9.3)               | 46 | -- | --                       | -- | --  | --                       | 25            | 34.5 (11.0) | 20                       | 39 | 36.3 (8.8)  | 27                       | Rem/Cur | 1.5 T     |               |
| Ashtari et al., 1999      | 86  | 65.1  | 46 | 71.4 (0.3)               | 28 | -- | --                       | -- | 40  | 74.3 (6.0)               | 28            | --          | --                       | -- | --          | --                       | Mix     | 1.0 T     |               |
| Ballmaier et al., 2008    | 80  | 66.3  | 34 | 72.4 (6.9)               | 19 | -- | --                       | -- | 46  | 71.1 (7.66)              | 34            | 24          | 68.0 (5.8)               | 20 | 22          | 74.5 (8.1)               | 14      | Mix/EO/LO | 1.5 T         |
| Bearden et al., 2009      | 62  | 77.4  | 31 | 36.7 (10.7)              | 24 | -- | --                       | -- | 31  | 39.2 (11.9)              | 24            | --          | --                       | -- | --          | --                       | Mix     | 1.5 T     |               |

**Appendix 1** to Espinoza Oyarce DA, Shaw ME, Alateeq K, et al. Volumetric brain differences in clinical depression in association with anxiety: a systematic review with meta-analysis. *J Psychiatry Neurosci* 2020. DOI: 10.1503/jpn.190156

Online appendices are unedited and posted as supplied by the authors.

| Reference                         | n   | %F    | HC  |                          |    |    |                          |    | DEP |                          |    |             |                          |    | DEP subgroups |                          | Scanner |             |               |
|-----------------------------------|-----|-------|-----|--------------------------|----|----|--------------------------|----|-----|--------------------------|----|-------------|--------------------------|----|---------------|--------------------------|---------|-------------|---------------|
|                                   |     |       | n   | Age (years)<br>mean (SD) | F  | n  | Age (years)<br>mean (SD) | F  | n   | Age (years)<br>mean (SD) | F  | n           | Age (years)<br>mean (SD) | F  | n             | Age (years)<br>mean (SD) |         | F           | DEP subgroups |
| Bergouigan et al., 2009           | 42  | 73.8  | 21  | 28.2 (5.5)               | 14 | -- | --                       | -- | --  | --                       | 21 | 33.2 (9.6)  | 17                       | -- | --            | --                       | LO      | 1.5 T       |               |
| Bijanki et al., 2014              | 40  | 65.0  | 20  | 45.4 (9.9)               | 13 | -- | --                       | -- | --  | --                       | 20 | 46.0 (9.5)  | 13                       | -- | --            | --                       | Psy     | 1.5 T       |               |
| Burke et al., 2011                | 122 | 60.7  | 31  | 68.8 (6.0)               | 21 | -- | --                       | -- | --  | --                       | 54 | 66.1 (6.0)  | 34                       | 37 | 70.1 (6.6)    | 19                       | EO/LO   | 1.5 T       |               |
| Caetano et al., 2004              | 62  | 77.4  | 31  | 36.7 (10.7)              | 24 | -- | --                       | -- | 31  | 39.2 (11.9)              | 24 | --          | --                       | -- | --            | --                       | Mix     | 1.5 T       |               |
| Carceller-Sindreu et al., 2015    | 95  | 75.8  | 34  | 47.9 (8.1)               | 24 | -- | --                       | -- | 21  | 44.4 (6.7)               | 14 | 20          | 47.1 (8.2)               | 18 | 20            | 48.6 (8.0)               | 16      | FE/ME/TR    | 3.0 T         |
| Cardoner et al., 2007             | 105 | 46.7  | 72  | 30.1 (10.2)              | 32 | -- | --                       | -- | --  | --                       | 33 | 30.1 (10.2) | 17                       | -- | --            | --                       | Anx     | 1.5 T       |               |
| Cohen et al., 2013                | 61  | 54.1  | 22  | 32.2 (11.5)              | 11 | -- | --                       | -- | 19  | 37.3 (11.7)              | 13 | 20          | 36.4 (13.4)              | 9  | --            | --                       | Mix/Psy | 3.0 T       |               |
| Cole et al., 2010                 | 74  | 75.7  | 37  | 42.2 (9.0)               | 28 | -- | --                       | -- | 37  | 41.9 (8.9)               | 28 | 13          | 38.1 (7.9)               | 11 | 24            | 44.0 (9.4)               | 17      | Mix/FE/ME   | 1.5 T         |
| Cole et al., 2011                 | 195 | 57.9  | 111 | 33.0 (9.2)               | 56 | -- | --                       | -- | --  | --                       | 84 | 48.8 (8.9)  | 57                       | -- | --            | --                       | ME      | 1.5 T       |               |
| Colloby et al., 2011              | 68  | 69.1  | 30  | 74.4 (6.4)               | 20 | -- | --                       | -- | 38  | 74.1 (6.1)               | 27 | --          | --                       | -- | --            | --                       | Mix     | 3.0 T       |               |
| Devantier et al., 2016            | 56  | 46.4  | 27  | 59.5 (5.0)               | 13 | -- | --                       | -- | --  | --                       | 29 | 59.8 (4.5)  | 13                       | -- | --            | --                       | LO      | 3.0 T       |               |
| De Winter et al., 2017            | 100 | 70.0  | 52  | 72.4 (6.4)               | 37 | -- | --                       | -- | 48  | 74.1 (7.51)              | 33 | --          | --                       | -- | --            | --                       | Mix     | 3.0 T       |               |
| Dombrovsky et al., 2012*          | 52  | 57.7  | 19  | 70.5 (7.5)               | 12 | -- | --                       | -- | 20  | 67.7 (7.0)               | 13 | 13          | 66.0 (6.4)               | 5  | --            | --                       | Mix/Sui | 3.0 T       |               |
| Eker et al., 2010                 | 47  | 74.5  | 22  | 29.7 (6.4)               | 17 | -- | --                       | -- | --  | --                       | 25 | 32.1 (9.3)  | 18                       | -- | --            | --                       | FE      | 1.5 T       |               |
| Eker et al., 2011                 | 87  | 69.0  | 43  | 30.4 (6.7)               | 27 | -- | --                       | -- | 44  | 33.6 (9.5)               | 33 | --          | --                       | -- | --            | --                       | Mix     | 1.5 T       |               |
| Elderkin-Thompson et al., 2008    | 84  | 63.1  | 41  | 72.2 (7.3)               | 20 | -- | --                       | -- | --  | --                       | 18 | 67.4 (5.9)  | 15                       | 25 | 73.0 (8.2)    | 18                       | EO/LO   | 1.5 T       |               |
| Emsell et al., 2017               | 107 | 72.0  | 52  | 72.7 (6.5)               | 38 | -- | --                       | -- | 55  | 73.6 (7.4)               | 39 | --          | --                       | -- | --            | --                       | Cur     | 3.0 T       |               |
| Exner et al., 2009                | 52  | 73.1  | 26  | 33.0 (8.9)               | 18 | -- | --                       | -- | --  | --                       | 26 | 35.0 (10.5) | 20                       | -- | --            | --                       | Mel     | 1.5 T       |               |
| Frodl et al., 2002                | 60  | 56.7  | 30  | 40.6 (12.5)              | 17 | -- | --                       | -- | --  | --                       | 30 | 40.3 (12.6) | 17                       | -- | --            | --                       | FE      | 1.5 T       |               |
| Frodl et al., 2003                | 114 | 52.6  | 30  | 40.6 (12.5)              | 17 | 27 | 46.3 (11.3)              | 13 | --  | --                       | 30 | 40.3 (12.6) | 17                       | 27 | 49.1 (10.5)   | 13                       | FE/ME   | 1.5 T       |               |
| Frodl et al., 2004                | 48  | 60.4  | 30  | 45.7 (12.9)              | 18 | -- | --                       | -- | --  | --                       | 18 | 46.4 (15.4) | 11                       | -- | --            | --                       | Rem     | 1.5 T       |               |
| Frodl et al., 2008†               | 60  | 63.3  | 30  | 43.6 (13.1)              | 19 | -- | --                       | -- | 30  | 45.0 (11.1)              | 19 | 17          | 42.7 (10.5)              | 12 | 13            | 48.1 (11.7)              | 7       | Mix/Rem/Cur | 1.5 T         |
| Frodl et al., 2012                | 83  | 59.0  | 43  | 37.0 (13.7)              | 25 | -- | --                       | -- | 40  | 41.4 (10.9)              | 24 | --          | --                       | -- | --            | --                       | Mix     | 3.0 T       |               |
| Fung et al., 2015                 | 48  | 60.4  | 29  | 27.1 (8.4)               | 18 | -- | --                       | -- | 19  | 30.0 (8.9)               | 11 | --          | --                       | -- | --            | --                       | Mix     | 3.0 T       |               |
| Gifuni et al., 2016 (Sample 1)*   | 44  | 0.0   | 12  | 41.5 (11.1)              | 0  | -- | --                       | -- | --  | --                       | 14 | 43.9 (10.5) | 0                        | 18 | 33.6 (10.9)   | 0                        | Rem/Sui | 1.5 T       |               |
| Gifuni et al., 2016 (Sample 2 M)* | 64  | 0.0   | 7   | 42.2 (8.5)               | 0  | -- | --                       | -- | --  | --                       | 13 | 39.0 (9.7)  | 0                        | 44 | 40.2 (6.3)    | 0                        | Rem/Sui | 1.5 T       |               |
| Gifuni et al., 2016 (Sample 2 F)* | 63  | 100.0 | 18  | 37.1 (10.4)              | 18 | -- | --                       | -- | --  | --                       | 25 | 36.7 (7.8)  | 25                       | 20 | 36.1 (7.0)    | 20                       | Rem/Sui | 1.5 T       |               |
| Han et al., 2014                  | 42  | 71.4  | 22  | 43.7 (12.3)              | 15 | -- | --                       | -- | --  | --                       | 20 | 42.7 (12.4) | 15                       | -- | --            | --                       | FE      | 3.0 T       |               |

Online appendices are unedited and posted as supplied by the authors.

| Reference                   | n %F |       | HC  |                          |    |    |                          |     | DEP         |                          | DEP subgroups |             |                          |    |             |                          | Scanner       |       |
|-----------------------------|------|-------|-----|--------------------------|----|----|--------------------------|-----|-------------|--------------------------|---------------|-------------|--------------------------|----|-------------|--------------------------|---------------|-------|
|                             |      |       | n   | Age (years)<br>mean (SD) | F  | n  | Age (years)<br>mean (SD) | F   | n           | Age (years)<br>mean (SD) | F             | n           | Age (years)<br>mean (SD) | F  | n           | Age (years)<br>mean (SD) |               | F     |
| Han et al., 2016            | 41   | 100.0 | 21  | 42.3 (10.2)              | 21 | -- | --                       | --  | --          | 20                       | 42.3 (13.7)   | 20          | --                       | -- | --          | --                       | noMed         | 1.5 T |
| Han et al., 2017            | 227  | 75.3  | 101 | 40.6 (13.8)              | 70 | -- | --                       | 126 | 43.8 (11.6) | 101                      | --            | --          | --                       | -- | --          | --                       | Mix           | 3.0 T |
| Hannestad et al., 2006      | 246  | 69.1  | 64  | 70.0 (7.7)               | 41 | -- | --                       | 182 | 70.2 (5.8)  | 129                      | --            | --          | --                       | -- | --          | --                       | Mix           | 1.5 T |
| Hickie et al., 2007         | 61   | 63.9  | 16  | 55.8 (10.3)              | 9  | -- | --                       | 45  | 52.0 (12.8) | 30                       | --            | --          | --                       | -- | --          | --                       | Mix           | 1.5 T |
| Huang et al., 2013          | 47   | 61.7  | 27  | 32.8 (9.9)               | 19 | -- | --                       | 20  | 35.0 (10.5) | 10                       | 9             | 32.7 (11.6) | 4                        | 11 | 36.9 (9.6)  | 6                        | Mix/noMed/Med | 4.7 T |
| Hviid et al., 2010          | 69   | 69.6  | 38  | 47.7 (11.2)              | 28 | -- | --                       | --  | --          | --                       | 31            | 47.5 (11.9) | 20                       | -- | --          | --                       | Rem           | 1.5 T |
| Janssen et al., 2004        | 69   | 100.0 | 41  | 62.4 (11.4)              | 41 | -- | --                       | --  | --          | --                       | 28            | 64.0 (10.9) | 28                       | -- | --          | --                       | EO            | 1.5 T |
| Janssen et al., 2007        | 37   | 100.0 | 22  | 71.1 (7.5)               | 22 | -- | --                       | --  | --          | --                       | 15            | 72.7 (6.7)  | 15                       | -- | --          | --                       | LO            | 1.5 T |
| Kanellopoulos et al., 2010* | 56   | 62.5  | 23  | 70.7 (5.7)               | 14 | -- | --                       | 33  | 72.3 (6.8)  | 21                       | --            | --          | --                       | -- | --          | --                       | Mix           | 1.5 T |
| Keller et al., 2008         | 64   | 53.1  | 22  | 32.2 (11.5)              | 11 | -- | --                       | --  | --          | --                       | 19            | 36.6 (11.9) | 12                       | 23 | 36.5 (13.2) | 11                       | Cur/Psy       | 3.0 T |
| Klauser et al., 2015        | 89   | 68.5  | 33  | 34.7 (9.9)               | 21 | -- | --                       | 56  | 34.0 (9.0)  | 40                       | 27            | 35.0 (9.7)  | 18                       | 29 | 33.1 (8.3)  | 22                       | Mix/Rem/Cur   | 1.5 T |
| Kronmuller et al., 2009 (M) | 35   | 0.0   | 11  | 42.0 (11.3)              | 0  | -- | --                       | --  | --          | --                       | 13            | 38.1 (11.9) | 0                        | 11 | 48.3 (8.7)  | 0                        | FE/ME         | 1.5 T |
| Kronmuller et al., 2009 (F) | 52   | 100.0 | 19  | 42.7 (14.0)              | 19 | -- | --                       | --  | --          | --                       | 13            | 41.5 (16.6) | 13                       | 20 | 45.9 (11.8) | 20                       | FE/ME         | 1.5 T |
| Kumar et al., 1998          | 65   | 73.8  | 30  | 69.4 (6.1)               | 23 | -- | --                       | --  | --          | --                       | 35            | 74.6 (6.9)  | 25                       | -- | --          | --                       | LO            | 1.5 T |
| Kumar et al., 2000          | 81   | 72.8  | 30  | 69.4 (6.1)               | 23 | -- | --                       | 51  | 74.3 (6.6)  | 36                       | --            | --          | --                       | -- | --          | --                       | Mix           | 1.5 T |
| Lacerda et al., 2003        | 73   | 45.2  | 48  | 35.1 (10.0)              | 29 | -- | --                       | 25  | 41.2 (11.0) | 4                        | --            | --          | --                       | -- | --          | --                       | Mix           | 1.5 T |
| Lavretsky et al., 2005      | 82   | 63.4  | 41  | 72.2 (7.3)               | 20 | -- | --                       | --  | --          | --                       | 30            | 71.7 (7.8)  | 25                       | 11 | 67.4 (6.1)  | 7                        | noMed/Med     | 1.5 T |
| Lavretsky et al., 2007      | 84   | 63.1  | 41  | 72.2 (7.3)               | 20 | -- | --                       | 43  | 70.7 (7.8)  | 33                       | --            | --          | --                       | -- | --          | --                       | Mix           | 1.5 T |
| Lenze et al., 1999          | 48   | 100.0 | 24  | 53.0 (??)                | 24 | -- | --                       | 24  | 53.0 (??)   | 24                       | --            | --          | --                       | -- | --          | --                       | Mix           | 1.5 T |
| Lenze et al., 2008          | 55   | 100.0 | 24  | 46.0 (14.0)              | 24 | -- | --                       | --  | --          | --                       | 31            | 50.0 (15.0) | 31                       | -- | --          | --                       | Rem           | 1.5 T |
| Lim et al., 2012a           | 60   | 51.7  | 30  | 72.4 (4.5)               | 16 | -- | --                       | 30  | 73.7 (6.4)  | 15                       | --            | --          | --                       | -- | --          | --                       | Mix           | 3.0 T |
| Lim et al., 2012b           | 95   | 77.9  | 47  | 70.7 (4.4)               | 38 | -- | --                       | --  | --          | --                       | 48            | 71.8 (4.8)  | 36                       | -- | --          | --                       | LO            | 3.0 T |
| Lloyd et al., 2004          | 90   | 77.8  | 39  | 73.1 (6.7)               | 29 | -- | --                       | 51  | 74.0 (6.3)  | 41                       | 23            | 72.7 (6.7)  | 22                       | 28 | 75.1 (5.8)  | 19                       | Mix/EO/LO     | 1.0 T |
| Lorenzetti et al., 2009     | 89   | 68.5  | 33  | 34.0 (9.9)               | 21 | -- | --                       | --  | --          | --                       | 27            | 35.1 (10.0) | 18                       | 29 | 32.5 (8.3)  | 22                       | Rem/Cur       | 1.5 T |
| Lorenzetti et al., 2010     | 87   | 70.1  | 31  | 34.7 (9.9)               | 21 | -- | --                       | --  | --          | --                       | 27            | 35.1 (10.0) | 18                       | 29 | 32.5 (8.3)  | 22                       | Rem/Cur       | 1.5 T |
| Machino et al., 2014        | 58   | 44.8  | 29  | 38.7 (8.4)               | 13 | -- | --                       | --  | --          | --                       | 29            | 39.6 (8.3)  | 13                       | -- | --          | --                       | TR            | 1.5 T |
| Maller et al., 2007 (M)     | 35   | 0.0   | 13  | 39.3 (12.7)              | 0  | -- | --                       | 22  | 37.3 (8.8)  | 0                        | --            | --          | --                       | -- | --          | --                       | Mix           | 1.5 T |
| Maller et al., 2007 (F)     | 40   | 100.0 | 17  | 35.8 (11.0)              | 17 | -- | --                       | 23  | 37.5 (13.0) | 23                       | --            | --          | --                       | -- | --          | --                       | Mix           | 1.5 T |

**Appendix 1** to Espinoza Oyarce DA, Shaw ME, Alateeq K, et al. Volumetric brain differences in clinical depression in association with anxiety: a systematic review with meta-analysis. *J Psychiatry Neurosci* 2020. DOI: 10.1503/jpn.190156

Online appendices are unedited and posted as supplied by the authors.

| Reference                   | n %F |       | HC          |             |             |    |             |    | DEP         |             |             |     |             |     | DEP subgroups |             | Scanner |               |         |
|-----------------------------|------|-------|-------------|-------------|-------------|----|-------------|----|-------------|-------------|-------------|-----|-------------|-----|---------------|-------------|---------|---------------|---------|
|                             |      |       | Age (years) |             | Age (years) |    | Age (years) |    | Age (years) |             | Age (years) |     | Age (years) |     | DEP subgroups |             |         |               |         |
|                             | n    | %F    | n           | mean (SD)   | F           | n  | mean (SD)   | F  | n           | mean (SD)   | F           | n   | mean (SD)   | F   | n             | mean (SD)   | F       | DEP subgroups | Scanner |
| Maller et al., 2012         | 258  | 47.7  | 76          | 35.0 (9.8)  | 35          | -- | --          | -- | --          | --          | --          | 182 | 42.2 (14.0) | 88  | --            | --          | --      | TR            | 1.5 T   |
| Malykhin et al., 2010       | 73   | 76.7  | 34          | 33.5 (8.1)  | 27          | -- | --          | -- | --          | --          | --          | 23  | 35.7 (8.5)  | 15  | 16            | 32.2 (7.8)  | 14      | noMed/Med     | 1.5 T   |
| Meisenzahl et al., 2010     | 230  | 46.5  | 138         | 33.3 (12.2) | 60          | -- | --          | -- | 92          | 44.6 (12.3) | 47          | 47  | 41.8 (13.5) | 26  | 45            | 45.5 (11.1) | 21      | Mix/FE/ME     | 1.5 T   |
| Naismith et al., 2002       | 67   | 65.7  | 20          | 56.1 (9.8)  | 12          | -- | --          | -- | 47          | 51.8 (12.4) | 32          | --  | --          | --  | --            | --          | --      | Mix           | NA      |
| Nugent et al., 2013         | 381  | 58.8  | 169         | 34.0 (9.3)  | 98          | -- | --          | -- | --          | --          | --          | 71  | 38.0 (12.1) | 50  | 141           | 36.0 (11.1) | 76      | Rem/Cur       | 3.0 T   |
| Ota et al., 2017            | 71   | 46.5  | 35          | 38.9 (13.4) | 16          | -- | --          | -- | 36          | 38.4 (11.3) | 17          | 19  | 35.7 (11.7) | 10  | 17            | 41.3 (10.3) | 7       | Rem/noMed/Med | 3.0 T   |
| Ozalay et al., 2013         | 69   | 73.9  | 33          | 31.4 (7.8)  | 23          | -- | --          | -- | --          | --          | --          | 36  | 31.6 (8.0)  | 28  | --            | --          | --      | noMed         | 1.5 T   |
| Ozalay et al., 2016         | 48   | 100.0 | 24          | 47.3 (5.6)  | 24          | -- | --          | -- | --          | --          | --          | 24  | 46.2 (3.9)  | 24  | --            | --          | --      | FH            | 3.0 T   |
| Pan et al., 2009            | 253  | 68.4  | 83          | 69.8 (5.6)  | 61          | -- | --          | -- | 170         | 69.4 (7.5)  | 112         | --  | --          | --  | --            | --          | --      | Mix           | 1.5 T   |
| Parashos et al., 1998       | 64   | 56.3  | 32          | 53.8 (17.7) | 18          | -- | --          | -- | 32          | 54.2 (17.6) | 18          | --  | --          | --  | --            | --          | --      | Mix           | 1.5 T   |
| Penttila et al., 2009       | 105  | 54.3  | 70          | 42.8 (11.5) | 33          | -- | --          | -- | --          | --          | --          | 35  | 47.2 (8.8)  | 24  | --            | --          | --      | TR            | 1.5 T   |
| Phillips et al., 2015       | 54   | 66.7  | 28          | 45.7 (10.6) | 18          | -- | --          | -- | --          | --          | --          | 26  | 46.0 (10.4) | 18  | --            | --          | --      | TR            | 1.5 T   |
| Posener et al., 2003        | 69   | 55.1  | 42          | 33.2 (10.8) | 23          | -- | --          | -- | --          | --          | --          | 27  | 33.0 (10.7) | 15  | --            | --          | --      | Cur           | 1.5 T   |
| Ribeiz et al., 2013         | 52   | 76.9  | 22          | 70.4 (7.6)  | 17          | -- | --          | -- | 30          | 70.7 (6.6)  | 23          | --  | --          | --  | --            | --          | --      | Mix           | 1.5 T   |
| Rodriguez-Cano et al., 2014 | 96   | 60.4  | 64          | 46.0 (9.8)  | 38          | -- | --          | -- | 32          | 48.7 (13.0) | 20          | --  | --          | --  | --            | --          | --      | Mix           | 1.5 T   |
| Rusch et al., 2001          | 40   | 57.5  | 15          | 37.4 (14.4) | 9           | -- | --          | -- | 25          | 33.2 (9.5)  | 14          | --  | --          | --  | --            | --          | --      | Mix           | 1.5 T   |
| Sacchet et al., 2017*       | 232  | 75.4  | 116         | 33.7 (10.5) | 84          | -- | --          | -- | 116         | 36.5 (11.6) | 91          | --  | --          | --  | --            | --          | --      | Mix           | 3.0 T   |
| Savitz et al., 2011         | 134  | 62.7  | 74          | 37.1 (11.9) | 45          | -- | --          | -- | --          | --          | --          | 32  | 41.3 (13.3) | 24  | 28            | 43.9 (11.5) | 15      | Rem/Cur       | 3.0 T   |
| Savitz et al., 2015a        | 100  | 71.0  | 47          | 34.3 (11.4) | 29          | -- | --          | -- | --          | --          | --          | 53  | 34.6 (9.8)  | 42  | --            | --          | --      | noMed         | 3.0 T   |
| Savitz et al., 2015b        | 49   | 69.4  | 20          | 35.0 (10.9) | 10          | -- | --          | -- | --          | --          | --          | 29  | 36.4 (10.0) | 24  | --            | --          | --      | Cur           | 3.0 T   |
| Sawyer et al., 2012         | 384  | 68.8  | 146         | 70.4 (6.3)  | 103         | -- | --          | -- | --          | --          | --          | 238 | 70.0 (7.5)  | 161 | --            | --          | --      | Cur           | 1.5 T   |
| Saylam et al., 2006         | 48   | 75.0  | 24          | 30.2 (6.1)  | 18          | -- | --          | -- | 24          | 33.4 (9.3)  | 18          | --  | --          | --  | --            | --          | --      | Mix           | 1.5 T   |
| Schmidt et al., 2017        | 60   | 61.7  | 20          | 36.5 (13.2) | 12          | -- | --          | -- | --          | --          | --          | 20  | 36.2 (12.8) | 12  | 20            | 40.6 (12.1) | 13      | noMed/Med     | 7.0 T   |
| Sexton et al., 2012         | 61   | 65.6  | 25          | 71.8 (7.3)  | 16          | -- | --          | -- | 36          | 71.8 (7.7)  | 24          | --  | --          | --  | --            | --          | --      | Mix           | 3.0 T   |
| Sheline et al., 1998        | 40   | 100.0 | 20          | 53.0 (17.0) | 20          | -- | --          | -- | --          | --          | --          | 20  | 54.0 (18.0) | 20  | --            | --          | --      | Rem           | 1.5 T   |
| Sivakumar et al., 2015      | 45   | 48.9  | 20          | 65.4 (5.7)  | 7           | -- | --          | -- | --          | --          | --          | 25  | 65.3 (5.7)  | 15  | --            | --          | --      | LO            | 3.0 T   |
| Soriano-Mas et al., 2011    | 110  | 58.2  | 40          | 59.2 (7.1)  | 23          | -- | --          | -- | --          | --          | --          | 70  | 61.6 (9.7)  | 41  | --            | --          | --      | Mel           | 1.5 T   |
| Stratmann et al., 2014      | 264  | 56.8  | 132         | 37.8 (11.4) | 74          | -- | --          | -- | 132         | 37.9 (11.9) | 76          | --  | --          | --  | --            | --          | --      | Mix           | 3.0 T   |

**Appendix 1** to Espinoza Oyarce DA, Shaw ME, Alateeq K, et al. Volumetric brain differences in clinical depression in association with anxiety: a systematic review with meta-analysis. *J Psychiatry Neurosci* 2020.  
DOI: 10.1503/jpn.190156

Online appendices are unedited and posted as supplied by the authors.

| Reference                   | n %F |       | HC          |             |     |             |            |    | DEP         |             |     |             |             |    | DEP subgroups |             | Scanner |               |         |
|-----------------------------|------|-------|-------------|-------------|-----|-------------|------------|----|-------------|-------------|-----|-------------|-------------|----|---------------|-------------|---------|---------------|---------|
|                             |      |       | Age (years) |             |     | Age (years) |            |    | Age (years) |             |     | Age (years) |             |    | DEP subgroups |             |         |               |         |
|                             | n    | %F    | n           | mean (SD)   | F   | n           | mean (SD)  | F  | n           | mean (SD)   | F   | n           | mean (SD)   | F  | n             | mean (SD)   | F       | DEP subgroups | Scanner |
| Tae et al., 2011            | 42   | 100.0 | 21          | 42.3 (10.2) | 21  | --          | --         | -- | 21          | 41.7 (11.0) | 21  | --          | --          | -- | --            | --          | --      | Mix           | 1.5 T   |
| Taylor et al., 2005         | 218  | 70.6  | 83          | 69.4 (6.3)  | 64  | --          | --         | -- | --          | --          | --  | 72          | 68.7 (6.4)  | 51 | 63            | 71.5 (7.9)  | 39      | EO/LO         | 1.5 T   |
| Taylor et al., 2007         | 370  | 67.6  | 144         | 70.3 (6.5)  | 100 | --          | --         | -- | 226         | 70.0 (7.4)  | 150 | --          | --          | -- | --            | --          | --      | Mix           | 1.5 T   |
| Taylor et al., 2014         | 144  | 69.4  | 70          | 69.7 (6.2)  | 57  | --          | --         | -- | --          | --          | --  | 47          | 69.3 (6.5)  | 28 | 27            | 72.1 (7.3)  | 15      | Rem/Cur       | 1.5 T   |
| Taylor et al., 2015         | 144  | 67.4  | 91          | 29.9 (9.1)  | 56  | --          | --         | -- | --          | --          | --  | 53          | 37.5 (8.9)  | 41 | --            | --          | --      | EO            | NA      |
| Turner et al., 2012*        | 89   | 57.3  | 44          | 33.6 (9.7)  | 24  | --          | --         | -- | 45          | 36.7 (9.6)  | 27  | --          | --          | -- | --            | --          | --      | Mix           | 3.0 T   |
| Ueda et al., 2016           | 78   | 33.3  | 48          | 41.2 (11.4) | 13  | --          | --         | -- | --          | --          | --  | 30          | 44.3 (13.0) | 13 | --            | --          | --      | FE            | 3.0 T   |
| van Eijndhoven et al., 2009 | 60   | 66.7  | 20          | 37.3 (12.7) | 13  | --          | --         | -- | --          | --          | --  | 20          | 35.8 (11.7) | 14 | 20            | 34.1 (11.6) | 13      | Rem/FE        | 1.5 T   |
| van Tol et al., 2010        | 221  | 65.2  | 65          | 40.5 (9.7)  | 41  | 58          | 38.9 (9.0) | 37 | 68          | 37.2 (10.2) | 44  | 88          | 37.3 (10.6) | 59 | 68            | 37.4 (10.1) | 41      | Mix/Anx/FE    | 3.0 T   |
| Vasic et al., 2015          | 72   | 61.1  | 29          | 34.5 (10.7) | 18  | --          | --         | -- | 43          | 37.1 (10.9) | 26  | --          | --          | -- | --            | --          | --      | Mix           | 3.0 T   |
| Vassilopoulou et al., 2013  | 57   | 73.7  | 18          | 46.6 (7.5)  | 13  | --          | --         | -- | --          | --          | --  | 22          | 52.1 (8.2)  | 17 | 17            | 52.9 (10.8) | 12      | Mel/Psy       | 1.5 T   |
| Vythilingam et al., 2002    | 46   | 100.0 | 14          | 27.0 (5.0)  | 14  | --          | --         | -- | 11          | 34.0 (8.0)  | 11  | 21          | 33.0 (6.0)  | 21 | --            | --          | --      | Mix/Abu       | 1.5 T   |
| Vythilingam et al., 2004    | 71   | 62.0  | 33          | 34.0 (10.0) | 21  | --          | --         | -- | 38          | 41.0 (11.0) | 23  | --          | --          | -- | --            | --          | --      | Mix           | 1.5 T   |
| Weber et al., 2010          | 100  | 79.0  | 62          | 71.1 (7.3)  | 48  | --          | --         | -- | --          | --          | --  | 38          | 66.1 (6.2)  | 31 | --            | --          | --      | EO            | 3.0 T   |
| Weniger et al., 2006        | 44   | 100.0 | 23          | 32.0 (7.0)  | 23  | --          | --         | -- | 21          | 34.0 (9.0)  | 21  | --          | --          | -- | --            | --          | --      | Mix           | 1.5 T   |
| Wisse et al., 2015          | 47   | 61.7  | 34          | 62.0 (11.0) | 23  | --          | --         | -- | 13          | 54.0 (7.0)  | 6   | --          | --          | -- | --            | --          | --      | Mix           | 1.5 T   |
| Wolkowitz et al., 2015      | 43   | 62.8  | 18          | 37.8 (12.0) | 12  | --          | --         | -- | --          | --          | --  | 25          | 34.9 (9.6)  | 15 | --            | --          | --      | noMed         | 4.0 T   |
| Yang et al., 2017           | 168  | 72.6  | 68          | 29.8 (6.5)  | 49  | 16          | 32.9 (7.6) | 12 | --          | --          | --  | 43          | 30.1 (7.5)  | 31 | 41            | 31.7 (8.0)  | 30      | FE/Abu        | 3.0 T   |
| Zannas et al., 2013         | 159  | 69.8  | 70          | 69.1 (6.0)  | 56  | --          | --         | -- | 89          | 69.9 (6.9)  | 55  | --          | --          | -- | --            | --          | --      | Mix           | 1.5 T   |
| Zavorotnyy et al., 2018     | 53   | 77.4  | 30          | 49.6 (14.6) | 23  | --          | --         | -- | 23          | 48.7 (13.7) | 18  | --          | --          | -- | --            | --          | --      | Mix           | 3.0 T   |
| Zhao et al., 2017a          | 88   | 46.6  | 43          | 31.3 (7.8)  | 21  | --          | --         | -- | 45          | 32.7 (7.9)  | 20  | --          | --          | -- | --            | --          | --      | Mix           | 3.0 T   |
| Zhao et al., 2017b          | 77   | 44.2  | 41          | 30.8 (7.3)  | 18  | --          | --         | -- | --          | --          | --  | 36          | 32.8 (8.0)  | 16 | --            | --          | --      | FE            | 3.0 T   |



Online appendices are unedited and posted as supplied by the authors.

**Supplemental Table S3. Detailed NOS scores**

Detailed description of scores in each item of the modified NOS. 0= no star, 0.5= ½★, 1= ★.

| Reference                      | Rater | Selection |     |    |    | Comparability      |                   | Exposure |                |                   |    | Score |
|--------------------------------|-------|-----------|-----|----|----|--------------------|-------------------|----------|----------------|-------------------|----|-------|
|                                |       | 1a        | 1b  | 1c | 1d | 2a<br>(age/gender) | 2a<br>(neuro/dem) | 3a       | 3b<br>(record) | 3b<br>(interview) | 3c |       |
| Abdallah et al., 2017          | KA    | 1         | 0   | 0  | 1  | 0.5                | 1                 | 0        | 1              | 0                 | 1  | 5.5   |
|                                | DEO   | 1         | 0   | 0  | 1  | 0.5                | 1                 | 0        | 1              | 0                 | 1  | 5.5   |
| Abdallah et al., 2015          | KA    | 1         | 0   | 0  | 1  | 1                  | 1                 | 0        | 1              | 0                 | 1  | 6.0   |
|                                | DEO   | 1         | 0   | 0  | 1  | 1                  | 1                 | 0        | 1              | 0                 | 1  | 6.0   |
| Abe et al., 2010               | KA    | 1         | 0   | 0  | 1  | 1                  | 1                 | 0        | 1              | 0                 | 1  | 6.0   |
|                                | DEO   | 1         | 0   | 0  | 1  | 1                  | 1                 | 0        | 1              | 0                 | 1  | 6.0   |
| Ahdidan et al., 2013           | KA    | 1         | 0.5 | 1  | 1  | 1                  | 1                 | 1        | 1              | 0                 | 1  | 8.5   |
|                                | DEO   | 1         | 0.5 | 1  | 1  | 1                  | 1                 | 1        | 1              | 0                 | 1  | 8.5   |
| Almeida et al., 2003           | KA    | 1         | 0.5 | 0  | 0  | 1                  | 1                 | 0        | 1              | 0                 | 1  | 5.5   |
|                                | DEO   | 1         | 0.5 | 0  | 0  | 1                  | 1                 | 0        | 1              | 0                 | 1  | 5.5   |
| Andreescu et al., 2008         | KA    | 1         | 0.5 | 0  | 1  | 1                  | 1                 | 0        | 1              | 0                 | 1  | 6.5   |
|                                | DEO   | 1         | 0.5 | 0  | 1  | 1                  | 1                 | 0        | 1              | 0                 | 1  | 6.5   |
| Arnone et al., 2013            | KA    | 1         | 0   | 0  | 1  | 1                  | 1                 | 1        | 1              | 0                 | 1  | 7.0   |
|                                | DEO   | 1         | 0   | 0  | 1  | 1                  | 1                 | 1        | 1              | 0                 | 1  | 7.0   |
| Ashtari et al., 1999           | KA    | 1         | 0.5 | 1  | 1  | 1                  | 1                 | 1        | 1              | 0                 | 1  | 8.5   |
|                                | DEO   | 1         | 0.5 | 1  | 1  | 1                  | 1                 | 1        | 1              | 0                 | 1  | 8.5   |
| Ballmaier et al., 2008         | KA    | 1         | 0.5 | 1  | 1  | 1                  | 1                 | 0        | 1              | 0                 | 1  | 7.5   |
|                                | DEO   | 1         | 0.5 | 1  | 1  | 1                  | 1                 | 0        | 1              | 0                 | 1  | 7.5   |
| Bearden et al., 2009           | KA    | 1         | 0   | 1  | 1  | 1                  | 1                 | 0        | 1              | 0                 | 1  | 7.0   |
|                                | DEO   | 1         | 0   | 1  | 1  | 1                  | 1                 | 0        | 1              | 0                 | 1  | 7.0   |
| Bergouigan et al., 2009        | KA    | 1         | 0.5 | 1  | 1  | 1                  | 1                 | 1        | 1              | 0                 | 0  | 7.5   |
|                                | DEO   | 1         | 0.5 | 1  | 1  | 1                  | 1                 | 1        | 1              | 0                 | 0  | 7.5   |
| Bijanki et al., 2014           | KA    | 1         | 0.5 | 1  | 1  | 1                  | 1                 | 0        | 0              | 0                 | 0  | 5.5   |
|                                | DEO   | 1         | 0.5 | 1  | 1  | 1                  | 1                 | 0        | 0              | 0                 | 0  | 5.5   |
| Burke et al., 2011             | KA    | 1         | 0.5 | 1  | 1  | 1                  | 1                 | 0        | 1              | 0                 | 0  | 6.5   |
|                                | DEO   | 1         | 0.5 | 1  | 1  | 1                  | 1                 | 0        | 1              | 0                 | 0  | 6.5   |
| Caetano et al., 2004           | KA    | 1         | 0   | 0  | 1  | 1                  | 1                 | 0        | 1              | 0                 | 1  | 6.0   |
|                                | DEO   | 1         | 0   | 0  | 1  | 1                  | 1                 | 0        | 1              | 0                 | 1  | 6.0   |
| Carceller-Sindreu et al., 2015 | KA    | 1         | 0.5 | 0  | 1  | 1                  | 1                 | 1        | 0              | 0                 | 1  | 6.5   |
|                                | DEO   | 1         | 0.5 | 0  | 1  | 1                  | 1                 | 1        | 0              | 0                 | 1  | 6.5   |

**Appendix 1** to Espinoza Oyarce DA, Shaw ME, Alateeq K, et al. Volumetric brain differences in clinical depression in association with anxiety: a systematic review with meta-analysis. *J Psychiatry Neurosci* 2020.

DOI: 10.1503/jpn.190156

*Online appendices are unedited and posted as supplied by the authors.*

| Reference                      | Rater | Selection |     |     |    | Comparability      |                   | Exposure |                |                   |    | Score |
|--------------------------------|-------|-----------|-----|-----|----|--------------------|-------------------|----------|----------------|-------------------|----|-------|
|                                |       | 1a        | 1b  | 1c  | 1d | 2a<br>(age/gender) | 2a<br>(neuro/dem) | 3a       | 3b<br>(record) | 3b<br>(interview) | 3c |       |
| Cardoner et al., 2007          | KA    | 1         | 1   | 1   | 1  | 1                  | 1                 | 0        | 1              | 0                 | 1  | 8.0   |
|                                | DEO   | 1         | 1   | 1   | 1  | 1                  | 1                 | 0        | 1              | 0                 | 1  | 8.0   |
| Cohen et al., 2013             | KA    | 1         | 0.5 | 0.5 | 1  | 1                  | 0                 | 0        | 1              | 0                 | 1  | 6.0   |
|                                | DEO   | 1         | 0.5 | 0.5 | 1  | 1                  | 0                 | 0        | 1              | 0                 | 1  | 6.0   |
| Cole et al., 2010              | KA    | 1         | 0.5 | 1   | 1  | 1                  | 1                 | 0        | 1              | 0                 | 1  | 7.5   |
|                                | DEO   | 1         | 0.5 | 1   | 1  | 1                  | 1                 | 0        | 1              | 0                 | 1  | 7.5   |
| Cole et al., 2011              | KA    | 1         | 0.5 | 0   | 1  | 1                  | 1                 | 0        | 1              | 0                 | 1  | 6.5   |
|                                | DEO   | 1         | 0.5 | 0   | 1  | 1                  | 1                 | 0        | 1              | 0                 | 1  | 6.5   |
| Colloby et al., 2011           | KA    | 1         | 0.5 | 1   | 1  | 0.5                | 1                 | 1        | 0              | 0                 | 1  | 7.0   |
|                                | DEO   | 1         | 0.5 | 1   | 1  | 0.5                | 1                 | 1        | 0              | 0                 | 1  | 7.0   |
| Devantier et al., 2016         | KA    | 1         | 0.5 | 1   | 1  | 1                  | 1                 | 0        | 1              | 0                 | 1  | 7.5   |
|                                | DEO   | 1         | 0.5 | 1   | 1  | 1                  | 1                 | 1        | 1              | 0                 | 0  | 7.5   |
| De Winter et al., 2017         | KA    | 1         | 1   | 0   | 1  | 1                  | 1                 | 1        | 1              | 0                 | 0  | 7.0   |
|                                | DEO   | 1         | 1   | 0   | 1  | 1                  | 1                 | 1        | 1              | 0                 | 0  | 7.0   |
| Dombrovsky et al., 2012        | KA    | 1         | 0.5 | 0   | 1  | 0.5                | 1                 | 1        | 1              | 0                 | 1  | 7.0   |
|                                | DEO   | 1         | 0.5 | 0   | 1  | 0.5                | 1                 | 1        | 1              | 0                 | 1  | 7.0   |
| Eker et al., 2010              | KA    | 1         | 0.5 | 0   | 1  | 1                  | 1                 | 0        | 1              | 0                 | 1  | 6.5   |
|                                | DEO   | 1         | 0.5 | 0   | 1  | 1                  | 1                 | 0        | 1              | 0                 | 1  | 6.5   |
| Eker et al., 2011              | KA    | 1         | 0.5 | 1   | 1  | 1                  | 1                 | 1        | 1              | 0                 | 1  | 8.5   |
|                                | DEO   | 1         | 0.5 | 1   | 1  | 1                  | 1                 | 1        | 1              | 0                 | 1  | 8.5   |
| Elderkin-Thompson et al., 2008 | KA    | 1         | 0.5 | 1   | 1  | 1                  | 1                 | 1        | 1              | 0                 | 1  | 8.5   |
|                                | DEO   | 1         | 0.5 | 1   | 1  | 1                  | 1                 | 1        | 1              | 0                 | 1  | 8.5   |
| Emsell et al., 2017            | KA    | 1         | 0.5 | 1   | 1  | 1                  | 1                 | 1        | 1              | 0                 | 0  | 7.5   |
|                                | DEO   | 1         | 0.5 | 1   | 1  | 1                  | 1                 | 1        | 1              | 0                 | 0  | 7.5   |
| Exner et al., 2009             | KA    | 1         | 1   | 1   | 1  | 0                  | 1                 | 0        | 1              | 0                 | 0  | 6.0   |
|                                | DEO   | 1         | 1   | 1   | 1  | 0                  | 1                 | 0        | 1              | 0                 | 0  | 6.0   |
| Frodl et al., 2012             | KA    | 1         | 0.5 | 1   | 0  | 0                  | 1                 | 0        | 1              | 0                 | 1  | 5.5   |
|                                | DEO   | 1         | 0.5 | 1   | 0  | 0                  | 1                 | 0        | 1              | 0                 | 1  | 5.5   |
| Frodl et al., 2008             | KA    | 1         | 0.5 | 1   | 1  | 1                  | 1                 | 0        | 1              | 0                 | 0  | 6.5   |
|                                | DEO   | 1         | 0.5 | 1   | 1  | 1                  | 1                 | 0        | 1              | 0                 | 0  | 6.5   |
| Frodl et al., 2002             | KA    | 1         | 0.5 | 0   | 1  | 1                  | 1                 | 0        | 1              | 0                 | 1  | 6.5   |
|                                | DEO   | 1         | 0.5 | 0   | 1  | 1                  | 1                 | 0        | 1              | 0                 | 1  | 6.5   |
| Frodl et al., 2003             | KA    | 1         | 0.5 | 1   | 1  | 1                  | 1                 | 0        | 1              | 0                 | 1  | 7.5   |
|                                | DEO   | 1         | 0.5 | 1   | 1  | 1                  | 1                 | 0        | 1              | 0                 | 1  | 7.5   |
| Frodl et al., 2004a            | KA    | 1         | 0.5 | 0   | 1  | 1                  | 1                 | 0        | 1              | 0                 | 1  | 6.5   |
|                                | DEO   | 1         | 0.5 | 0   | 1  | 1                  | 1                 | 0        | 1              | 0                 | 1  | 6.5   |
| Fung et al., 2015              | KA    | 1         | 0.5 | 1   | 1  | 0.5                | 1                 | 0        | 1              | 0                 | 1  | 7.0   |
|                                | DEO   | 1         | 0.5 | 1   | 1  | 0.5                | 1                 | 0        | 1              | 0                 | 1  | 7.0   |

**Appendix 1** to Espinoza Oyarce DA, Shaw ME, Alateeq K, et al. Volumetric brain differences in clinical depression in association with anxiety: a systematic review with meta-analysis. *J Psychiatry Neurosci* 2020.

DOI: 10.1503/jpn.190156

*Online appendices are unedited and posted as supplied by the authors.*

| Reference           | Rater | Selection |     |    |    | Comparability      |                   | Exposure |                |                   |    | Score |
|---------------------|-------|-----------|-----|----|----|--------------------|-------------------|----------|----------------|-------------------|----|-------|
|                     |       | 1a        | 1b  | 1c | 1d | 2a<br>(age/gender) | 2a<br>(neuro/dem) | 3a       | 3b<br>(record) | 3b<br>(interview) | 3c |       |
| Gifuni et al., 2016 | KA    | 1         | 0.5 | 1  | 1  | 0.5                | 1                 | 0        | 1              | 0                 | 0  | 6.0   |
|                     | DEO   | 1         | 0.5 | 1  | 1  | 0.5                | 1                 | 0        | 1              | 0                 | 0  | 6.0   |
| Han et al., 2014    | KA    | 1         | 0.5 | 1  | 1  | 1                  | 0                 | 0        | 1              | 0                 | 1  | 6.5   |
|                     | DEO   | 1         | 0.5 | 1  | 1  | 1                  | 0                 | 0        | 1              | 0                 | 1  | 6.5   |
| Han et al., 2016    | KA    | 1         | 0.5 | 1  | 1  | 1                  | 1                 | 0        | 1              | 0                 | 1  | 7.5   |
|                     | DEO   | 1         | 0.5 | 1  | 1  | 1                  | 1                 | 0        | 1              | 0                 | 1  | 7.5   |
| Han et al., 2017    | KA    | 1         | 0.5 | 1  | 1  | 1                  | 1                 | 0        | 1              | 0                 | 1  | 7.5   |
|                     | DEO   | 1         | 0.5 | 1  | 1  | 1                  | 1                 | 0        | 1              | 0                 | 1  | 7.5   |

|                            |     |   |     |   |   |     |   |   |   |   |   |     |
|----------------------------|-----|---|-----|---|---|-----|---|---|---|---|---|-----|
| Hannestad et al., 2006     | KA  | 1 | 0.5 | 1 | 0 | 1   | 1 | 0 | 0 | 0 | 1 | 5.5 |
|                            | DEO | 1 | 0.5 | 1 | 0 | 1   | 1 | 0 | 0 | 0 | 1 | 5.5 |
| Hickie et al., 2007        | KA  | 1 | 0.5 | 1 | 0 | 0   | 1 | 0 | 0 | 0 | 1 | 4.5 |
|                            | DEO | 1 | 0.5 | 1 | 0 | 0   | 1 | 0 | 0 | 0 | 1 | 4.5 |
| Huang et al., 2013         | KA  | 1 | 0   | 0 | 1 | 0   | 1 | 0 | 1 | 0 | 1 | 5.0 |
|                            | DEO | 1 | 0   | 0 | 1 | 0   | 1 | 0 | 1 | 0 | 1 | 5.0 |
| Hviid et al., 2010         | KA  | 1 | 1   | 0 | 1 | 0   | 1 | 0 | 1 | 0 | 0 | 5.0 |
|                            | DEO | 1 | 1   | 0 | 1 | 0   | 1 | 0 | 1 | 0 | 0 | 5.0 |
| Janssen et al., 2007       | KA  | 1 | 0.5 | 1 | 1 | 1   | 1 | 0 | 1 | 0 | 1 | 7.5 |
|                            | DEO | 1 | 0.5 | 1 | 1 | 1   | 1 | 0 | 1 | 0 | 1 | 7.5 |
| Janssen et al., 2004       | KA  | 1 | 0.5 | 1 | 1 | 1   | 1 | 0 | 1 | 0 | 1 | 7.5 |
|                            | DEO | 1 | 0.5 | 1 | 1 | 1   | 1 | 0 | 1 | 0 | 1 | 7.5 |
| Kanellopoulos et al., 2010 | KA  | 1 | 0.5 | 1 | 1 | 1   | 1 | 0 | 1 | 0 | 1 | 7.5 |
|                            | DEO | 1 | 0.5 | 1 | 1 | 1   | 1 | 0 | 1 | 0 | 1 | 7.5 |
| Keller et al., 2008        | KA  | 1 | 0.5 | 0 | 1 | 1   | 0 | 1 | 1 | 0 | 1 | 6.5 |
|                            | DEO | 1 | 0.5 | 0 | 1 | 1   | 0 | 1 | 1 | 0 | 1 | 6.5 |
| Klauser et al., 2015       | KA  | 1 | 0.5 | 1 | 1 | 1   | 1 | 1 | 1 | 0 | 0 | 7.5 |
|                            | DEO | 1 | 0.5 | 1 | 1 | 1   | 1 | 1 | 1 | 0 | 0 | 7.5 |
| Kronmuller et al., 2009    | KA  | 1 | 1   | 0 | 1 | 1   | 1 | 1 | 1 | 0 | 0 | 7.0 |
|                            | DEO | 1 | 1   | 0 | 1 | 1   | 1 | 1 | 1 | 0 | 0 | 7.0 |
| Kumar et al., 2000         | KA  | 1 | 0.5 | 1 | 1 | 1   | 1 | 0 | 1 | 0 | 1 | 7.5 |
|                            | DEO | 1 | 0.5 | 1 | 1 | 1   | 1 | 0 | 1 | 0 | 1 | 7.5 |
| Kumar et al., 1998         | KA  | 1 | 0.5 | 1 | 1 | 1   | 1 | 0 | 1 | 0 | 1 | 7.5 |
|                            | DEO | 1 | 0.5 | 1 | 1 | 1   | 1 | 0 | 1 | 0 | 1 | 7.5 |
| Lacerda et al., 2003       | KA  | 1 | 0   | 0 | 1 | 0.5 | 1 | 0 | 1 | 0 | 1 | 5.5 |
|                            | DEO | 1 | 0   | 0 | 1 | 0.5 | 1 | 0 | 1 | 0 | 1 | 5.5 |
| Lavretsky et al., 2007     | KA  | 1 | 0.5 | 1 | 1 | 1   | 1 | 1 | 1 | 0 | 1 | 8.5 |
|                            | DEO | 1 | 0.5 | 1 | 1 | 1   | 1 | 1 | 1 | 0 | 1 | 8.5 |
| Lavretsky et al., 2005     | KA  | 1 | 0.5 | 1 | 1 | 1   | 1 | 1 | 1 | 0 | 1 | 8.5 |

**Appendix 1** to Espinoza Oyarce DA, Shaw ME, Alateeq K, et al. Volumetric brain differences in clinical depression in association with anxiety: a systematic review with meta-analysis. *J Psychiatry Neurosci* 2020.

DOI: 10.1503/jpn.190156

Online appendices are unedited and posted as supplied by the authors.

| Reference          | Rater | Selection |     |    |    | Comparability      |                   | Exposure |                |                   |    | Score |
|--------------------|-------|-----------|-----|----|----|--------------------|-------------------|----------|----------------|-------------------|----|-------|
|                    |       | 1a        | 1b  | 1c | 1d | 2a<br>(age/gender) | 2a<br>(neuro/dem) | 3a       | 3b<br>(record) | 3b<br>(interview) | 3c |       |
|                    | DEO   | 1         | 0.5 | 1  | 1  | 1                  | 1                 | 1        | 1              | 0                 | 1  | 8.5   |
| Lenze et al., 1999 | KA    | 1         | 0.5 | 1  | 0  | 1                  | 1                 | 0        | 1              | 0                 | 1  | 6.5   |
|                    | DEO   | 1         | 0.5 | 1  | 0  | 1                  | 1                 | 0        | 1              | 0                 | 1  | 6.5   |
| Lenze et al., 2008 | KA    | 1         | 0.5 | 1  | 1  | 1                  | 1                 | 1        | 1              | 0                 | 1  | 8.5   |
|                    | DEO   | 1         | 0.5 | 1  | 1  | 1                  | 1                 | 1        | 1              | 0                 | 1  | 8.5   |
| Lim et al., 2012a  | KA    | 1         | 0   | 0  | 1  | 1                  | 1                 | 0        | 1              | 0                 | 1  | 6.0   |
|                    | DEO   | 1         | 0   | 0  | 1  | 1                  | 1                 | 0        | 1              | 0                 | 1  | 6.0   |
| Lim et al., 2012b  | KA    | 1         | 0.5 | 1  | 1  | 1                  | 1                 | 1        | 1              | 0                 | 1  | 8.5   |
|                    | DEO   | 1         | 0.5 | 1  | 1  | 1                  | 1                 | 1        | 1              | 0                 | 1  | 8.5   |
| Lloyd et al., 2004 | KA    | 1         | 0.5 | 1  | 1  | 0                  | 1                 | 0        | 0              | 0                 | 1  | 5.5   |
|                    | DEO   | 1         | 0.5 | 1  | 1  | 0                  | 1                 | 0        | 0              | 0                 | 1  | 5.5   |

|                         |     |   |     |   |   |     |   |   |   |   |   |     |
|-------------------------|-----|---|-----|---|---|-----|---|---|---|---|---|-----|
| Lorenzetti et al., 2009 | KA  | 1 | 0.5 | 0 | 1 | 1   | 1 | 1 | 1 | 0 | 0 | 6.5 |
|                         | DEO | 1 | 0.5 | 0 | 1 | 1   | 1 | 1 | 1 | 0 | 0 | 6.5 |
| Lorenzetti et al., 2010 | KA  | 1 | 0.5 | 0 | 1 | 0.5 | 1 | 1 | 1 | 0 | 0 | 6.0 |
|                         | DEO | 1 | 0.5 | 0 | 1 | 0.5 | 1 | 1 | 1 | 0 | 0 | 6.0 |
| Machino et al., 2014    | KA  | 1 | 0.5 | 0 | 1 | 1   | 1 | 0 | 1 | 0 | 1 | 6.5 |
|                         | DEO | 1 | 0.5 | 0 | 1 | 1   | 1 | 0 | 1 | 0 | 1 | 6.5 |
| Maller et al., 2007     | KA  | 1 | 0.5 | 1 | 1 | 1   | 1 | 0 | 1 | 0 | 1 | 7.5 |
|                         | DEO | 1 | 0.5 | 1 | 1 | 1   | 1 | 0 | 1 | 0 | 1 | 7.5 |
| Maller et al., 2012     | KA  | 1 | 0.5 | 1 | 1 | 0.5 | 1 | 0 | 1 | 0 | 1 | 7.0 |
|                         | DEO | 1 | 0.5 | 1 | 1 | 0.5 | 1 | 0 | 1 | 0 | 1 | 7.0 |
| Malykhin et al., 2010   | KA  | 1 | 0.5 | 1 | 1 | 1   | 1 | 0 | 1 | 0 | 1 | 7.5 |
|                         | DEO | 1 | 0.5 | 1 | 1 | 1   | 1 | 0 | 1 | 0 | 1 | 7.5 |
| Meisenzahl et al., 2010 | KA  | 1 | 0.5 | 1 | 1 | 1   | 1 | 1 | 1 | 0 | 1 | 8.5 |
|                         | DEO | 1 | 0.5 | 1 | 1 | 1   | 1 | 1 | 1 | 0 | 1 | 8.5 |
| Naismith et al., 2002   | KA  | 1 | 0.5 | 1 | 0 | 0   | 1 | 0 | 0 | 0 | 1 | 4.5 |
|                         | DEO | 1 | 0.5 | 1 | 0 | 0   | 1 | 0 | 0 | 0 | 1 | 4.5 |
| Nugent et al., 2013     | KA  | 1 | 0.5 | 0 | 1 | 1   | 0 | 0 | 1 | 0 | 1 | 5.5 |
|                         | DEO | 1 | 0.5 | 0 | 1 | 1   | 0 | 0 | 1 | 0 | 1 | 5.5 |
| Ota et al., 2017        | KA  | 1 | 0   | 0 | 1 | 1   | 1 | 1 | 1 | 0 | 0 | 6.0 |
|                         | DEO | 1 | 0   | 0 | 1 | 1   | 1 | 1 | 1 | 0 | 0 | 6.0 |
| Ozalay et al., 2013     | KA  | 1 | 0   | 0 | 1 | 1   | 1 | 0 | 1 | 0 | 1 | 6.0 |
|                         | DEO | 1 | 0   | 0 | 1 | 1   | 1 | 0 | 1 | 0 | 1 | 6.0 |
| Ozalay et al., 2016     | KA  | 1 | 0.5 | 1 | 1 | 1   | 1 | 0 | 1 | 0 | 0 | 6.5 |
|                         | DEO | 1 | 0.5 | 1 | 1 | 1   | 1 | 0 | 1 | 0 | 0 | 6.5 |
| Pan et al., 2009        | KA  | 1 | 0.5 | 1 | 1 | 1   | 1 | 1 | 1 | 0 | 1 | 8.5 |
|                         | DEO | 1 | 0.5 | 1 | 1 | 1   | 1 | 1 | 1 | 0 | 1 | 8.5 |

**Appendix 1** to Espinoza Oyarce DA, Shaw ME, Alateeq K, et al. Volumetric brain differences in clinical depression in association with anxiety: a systematic review with meta-analysis. *J Psychiatry Neurosci* 2020.

DOI: 10.1503/jpn.190156

*Online appendices are unedited and posted as supplied by the authors.*

| Reference                   | Rater | Selection |     |    |    | Comparability      |                   | Exposure |                |                   |    | Score |
|-----------------------------|-------|-----------|-----|----|----|--------------------|-------------------|----------|----------------|-------------------|----|-------|
|                             |       | 1a        | 1b  | 1c | 1d | 2a<br>(age/gender) | 2a<br>(neuro/dem) | 3a       | 3b<br>(record) | 3b<br>(interview) | 3c |       |
| Parashos et al., 1998       | KA    | 1         | 0.5 | 0  | 1  | 1                  | 1                 | 0        | 1              | 0                 | 1  | 6.5   |
|                             | DEO   | 1         | 0.5 | 0  | 1  | 1                  | 1                 | 0        | 1              | 0                 | 1  | 6.5   |
| Penttila et al., 2009       | KA    | 1         | 1   | 1  | 1  | 1                  | 1                 | 0        | 1              | 0                 | 1  | 8.0   |
|                             | DEO   | 1         | 1   | 1  | 1  | 1                  | 1                 | 0        | 1              | 0                 | 1  | 8.0   |
| Phillips et al., 2015       | KA    | 1         | 0.5 | 1  | 1  | 1                  | 1                 | 0        | 1              | 0                 | 0  | 6.5   |
|                             | DEO   | 1         | 0.5 | 1  | 1  | 1                  | 1                 | 0        | 1              | 0                 | 0  | 6.5   |
| Posener et al., 2003        | KA    | 1         | 0.5 | 1  | 1  | 1                  | 1                 | 1        | 1              | 0                 | 1  | 8.5   |
|                             | DEO   | 1         | 0.5 | 1  | 1  | 1                  | 1                 | 1        | 1              | 0                 | 1  | 8.5   |
| Ribeiz et al., 2013         | KA    | 1         | 0.5 | 1  | 1  | 0                  | 1                 | 0        | 1              | 0                 | 1  | 6.5   |
|                             | DEO   | 1         | 0.5 | 1  | 1  | 0                  | 1                 | 0        | 1              | 0                 | 1  | 6.5   |
| Rodriguez-Cano et al., 2014 | KA    | 1         | 0.5 | 1  | 1  | 0.5                | 1                 | 0        | 1              | 0                 | 1  | 7.0   |
|                             | DEO   | 1         | 0.5 | 1  | 1  | 0.5                | 1                 | 0        | 1              | 0                 | 1  | 7.0   |
| Rusch et al., 2001          | KA    | 1         | 0.5 | 1  | 1  | 0                  | 0                 | 0        | 1              | 0                 | 1  | 5.5   |
|                             | DEO   | 1         | 0.5 | 1  | 1  | 0                  | 0                 | 0        | 1              | 0                 | 1  | 5.5   |
| Sacchet et al., 2017        | KA    | 1         | 0   | 0  | 1  | 1                  | 1                 | 0        | 1              | 0                 | 1  | 6.0   |
|                             | DEO   | 1         | 0   | 0  | 1  | 1                  | 1                 | 0        | 1              | 0                 | 1  | 6.0   |
| Savitz et al., 2015a        | KA    | 1         | 0   | 0  | 1  | 1                  | 1                 | 0        | 1              | 0                 | 1  | 6.0   |
|                             | DEO   | 1         | 0   | 0  | 1  | 1                  | 1                 | 0        | 1              | 0                 | 1  | 6.0   |
| Savitz et al., 2015b        | KA    | 1         | 0   | 0  | 1  | 1                  | 1                 | 0        | 1              | 0                 | 0  | 5.0   |
|                             | DEO   | 1         | 0   | 0  | 1  | 1                  | 1                 | 0        | 1              | 0                 | 0  | 5.0   |
| Savitz et al., 2011         | KA    | 1         | 0   | 0  | 1  | 0                  | 1                 | 0        | 1              | 0                 | 1  | 5.0   |
|                             | DEO   | 1         | 0   | 0  | 1  | 0                  | 1                 | 0        | 1              | 0                 | 1  | 5.0   |
| Sawyer et al., 2012         | KA    | 1         | 0.5 | 1  | 1  | 0.5                | 1                 | 1        | 1              | 0                 | 1  | 8.0   |
|                             | DEO   | 1         | 0.5 | 1  | 1  | 0.5                | 1                 | 1        | 1              | 0                 | 1  | 8.0   |
| Saylam et al., 2006         | KA    | 1         | 0   | 0  | 1  | 0.5                | 1                 | 0        | 0              | 0                 | 1  | 4.5   |
|                             | DEO   | 1         | 0   | 0  | 1  | 0.5                | 1                 | 0        | 0              | 0                 | 1  | 4.5   |
| Schmidt et al., 2017        | KA    | 1         | 0.5 | 0  | 1  | 1                  | 1                 | 0        | 1              | 0                 | 1  | 6.5   |
|                             | DEO   | 1         | 0.5 | 0  | 1  | 1                  | 1                 | 0        | 1              | 0                 | 1  | 6.5   |
| Sexton et al., 2012         | KA    | 1         | 0.5 | 1  | 1  | 1                  | 1                 | 0        | 1              | 0                 | 1  | 7.5   |
|                             | DEO   | 1         | 0.5 | 1  | 1  | 1                  | 1                 | 0        | 1              | 0                 | 1  | 7.5   |
| Sheline et al., 1998        | KA    | 1         | 0.5 | 1  | 1  | 1                  | 1                 | 1        | 1              | 0                 | 0  | 7.5   |
|                             | DEO   | 1         | 0.5 | 1  | 1  | 1                  | 1                 | 1        | 1              | 0                 | 0  | 7.5   |
| Sivakumar et al., 2015      | KA    | 1         | 0.5 | 1  | 1  | 1                  | 1                 | 1        | 1              | 0                 | 1  | 8.5   |
|                             | DEO   | 1         | 0.5 | 1  | 1  | 1                  | 1                 | 1        | 1              | 0                 | 1  | 8.5   |
| Soriano-Mas et al., 2011    | KA    | 1         | 1   | 1  | 1  | 1                  | 1                 | 0        | 1              | 0                 | 1  | 8.0   |
|                             | DEO   | 1         | 1   | 1  | 1  | 1                  | 1                 | 0        | 1              | 0                 | 1  | 8.0   |
| Stratmann et al., 2014      | KA    | 1         | 0.5 | 1  | 1  | 1                  | 1                 | 1        | 1              | 0                 | 1  | 8.5   |

**Appendix 1** to Espinoza Oyarce DA, Shaw ME, Alateeq K, et al. Volumetric brain differences in clinical depression in association with anxiety: a systematic review with meta-analysis. *J Psychiatry Neurosci* 2020.

DOI: 10.1503/jpn.190156

Online appendices are unedited and posted as supplied by the authors.

| Reference                   | Rater | Selection |     |     |    | Comparability      |                   | Exposure |                |                   |    | Score |
|-----------------------------|-------|-----------|-----|-----|----|--------------------|-------------------|----------|----------------|-------------------|----|-------|
|                             |       | 1a        | 1b  | 1c  | 1d | 2a<br>(age/gender) | 2a<br>(neuro/dem) | 3a       | 3b<br>(record) | 3b<br>(interview) | 3c |       |
|                             | DEO   | 1         | 0.5 | 1   | 1  | 1                  | 1                 | 1        | 1              | 0                 | 1  | 8.5   |
| Tae et al., 2011            | KA    | 1         | 0.5 | 1   | 1  | 1                  | 1                 | 0        | 1              | 0                 | 1  | 7.5   |
|                             | DEO   | 1         | 0.5 | 1   | 1  | 1                  | 1                 | 0        | 1              | 0                 | 1  | 7.5   |
| Taylor et al., 2015         | KA    | 1         | 0.5 | 0   | 1  | 1                  | 1                 | 0        | 1              | 0                 | 0  | 5.5   |
|                             | DEO   | 1         | 0.5 | 0   | 1  | 1                  | 1                 | 0        | 1              | 0                 | 0  | 5.5   |
| Taylor et al., 2007         | KA    | 1         | 0.5 | 1   | 1  | 1                  | 1                 | 1        | 1              | 0                 | 1  | 8.5   |
|                             | DEO   | 1         | 0.5 | 1   | 1  | 1                  | 1                 | 1        | 1              | 0                 | 1  | 8.5   |
| Taylor et al., 2014         | KA    | 1         | 0.5 | 1   | 1  | 1                  | 1                 | 1        | 1              | 0                 | 1  | 8.5   |
|                             | DEO   | 1         | 0.5 | 1   | 1  | 1                  | 1                 | 1        | 1              | 0                 | 1  | 8.5   |
| Taylor et al., 2005         | KA    | 1         | 0.5 | 1   | 1  | 1                  | 1                 | 1        | 1              | 0                 | 1  | 8.5   |
|                             | DEO   | 1         | 0.5 | 1   | 1  | 1                  | 1                 | 1        | 1              | 0                 | 1  | 8.5   |
| Turner et al., 2012         | KA    | 1         | 0   | 0   | 1  | 0.5                | 1                 | 1        | 1              | 0                 | 1  | 6.5   |
|                             | DEO   | 1         | 0   | 0   | 1  | 0.5                | 1                 | 1        | 1              | 0                 | 1  | 6.5   |
| Ueda et al., 2016           | KA    | 1         | 0.5 | 1   | 0  | 1                  | 1                 | 0        | 1              | 0                 | 1  | 6.5   |
|                             | DEO   | 1         | 0.5 | 1   | 0  | 1                  | 1                 | 0        | 1              | 0                 | 1  | 6.5   |
| van Eijndhoven et al., 2009 | KA    | 1         | 0.5 | 1   | 1  | 1                  | 1                 | 0        | 1              | 0                 | 1  | 7.5   |
|                             | DEO   | 1         | 0.5 | 1   | 1  | 1                  | 1                 | 0        | 1              | 0                 | 1  | 7.5   |
| van Tol et al., 2010        | KA    | 1         | 1   | 1   | 1  | 1                  | 1                 | 0        | 1              | 0                 | 0  | 7.0   |
|                             | DEO   | 1         | 1   | 1   | 1  | 1                  | 1                 | 0        | 1              | 0                 | 0  | 7.0   |
| Vasic et al., 2015          | KA    | 1         | 0.5 | 1   | 1  | 1                  | 1                 | 1        | 1              | 0                 | 1  | 8.5   |
|                             | DEO   | 1         | 0.5 | 1   | 1  | 1                  | 1                 | 1        | 1              | 0                 | 1  | 8.5   |
| Vassilopoulou et al., 2013  | KA    | 1         | 0.5 | 1   | 0  | 0.5                | 1                 | 0        | 1              | 0                 | 0  | 5.0   |
|                             | DEO   | 1         | 0.5 | 1   | 0  | 0.5                | 1                 | 0        | 1              | 0                 | 0  | 5.0   |
| Vythilingam et al., 2002    | KA    | 1         | 0.5 | 1   | 1  | 1                  | 1                 | 0        | 1              | 0                 | 1  | 7.5   |
|                             | DEO   | 1         | 0.5 | 1   | 1  | 1                  | 1                 | 0        | 1              | 0                 | 1  | 7.5   |
| Vythilingam et al., 2004    | KA    | 1         | 0.5 | 1   | 1  | 0.5                | 1                 | 0        | 1              | 0                 | 1  | 7.0   |
|                             | DEO   | 1         | 0.5 | 1   | 1  | 0.5                | 1                 | 0        | 1              | 0                 | 1  | 7.0   |
| Weber et al., 2010          | KA    | 1         | 0.5 | 1   | 1  | 1                  | 1                 | 1        | 1              | 0                 | 0  | 7.5   |
|                             | DEO   | 1         | 0.5 | 1   | 1  | 1                  | 1                 | 1        | 1              | 0                 | 0  | 7.5   |
| Weniger et al., 2006        | KA    | 1         | 0.5 | 1   | 1  | 1                  | 1                 | 1        | 1              | 0                 | 1  | 8.5   |
|                             | DEO   | 1         | 0.5 | 1   | 1  | 1                  | 1                 | 1        | 1              | 0                 | 1  | 8.5   |
| Wisse et al., 2015          | KA    | 1         | 1   | 0   | 0  | 1                  | 0                 | 1        | 1              | 0                 | 0  | 5.0   |
|                             | DEO   | 1         | 1   | 0   | 0  | 1                  | 0                 | 1        | 1              | 0                 | 0  | 5.0   |
| Wolkowitz et al., 2015      | KA    | 1         | 0.5 | 0.5 | 1  | 1                  | 0                 | 1        | 1              | 0                 | 1  | 7.0   |
|                             | DEO   | 1         | 0.5 | 0.5 | 1  | 1                  | 0                 | 1        | 1              | 0                 | 1  | 7.0   |
| Yang et al., 2017           | KA    | 1         | 0.5 | 1   | 1  | 0.5                | 1                 | 0        | 1              | 0                 | 1  | 7.0   |
|                             | DEO   | 1         | 0.5 | 1   | 1  | 0.5                | 1                 | 0        | 1              | 0                 | 1  | 7.0   |

**Appendix 1** to Espinoza Oyarce DA, Shaw ME, Alateeq K, et al. Volumetric brain differences in clinical depression in association with anxiety: a systematic review with meta-analysis. *J Psychiatry Neurosci* 2020.

DOI: 10.1503/jpn.190156

*Online appendices are unedited and posted as supplied by the authors.*

| Reference               | Rater | Selection |     |    |    | Comparability      |                   | Exposure |                |                   |    | Score |
|-------------------------|-------|-----------|-----|----|----|--------------------|-------------------|----------|----------------|-------------------|----|-------|
|                         |       | 1a        | 1b  | 1c | 1d | 2a<br>(age/gender) | 2a<br>(neuro/dem) | 3a       | 3b<br>(record) | 3b<br>(interview) | 3c |       |
| Zannas et al., 2013     | KA    | 1         | 0.5 | 1  | 1  | 1                  | 1                 | 1        | 1              | 0                 | 0  | 7.5   |
|                         | DEO   | 1         | 0.5 | 1  | 1  | 1                  | 1                 | 1        | 1              | 0                 | 0  | 7.5   |
| Zavorotnyy et al., 2018 | KA    | 1         | 0.5 | 1  | 1  | 1                  | 1                 | 1        | 1              | 0                 | 1  | 8.5   |
|                         | DEO   | 1         | 0.5 | 1  | 1  | 1                  | 1                 | 1        | 1              | 0                 | 1  | 8.5   |
| Zhao et al., 2017a      | KA    | 1         | 0.5 | 0  | 1  | 1                  | 1                 | 0        | 1              | 0                 | 1  | 6.5   |
|                         | DEO   | 1         | 0.5 | 0  | 1  | 1                  | 1                 | 0        | 1              | 0                 | 1  | 6.5   |
| Zhao et al., 2017b      | KA    | 1         | 0.5 | 0  | 1  | 1                  | 1                 | 0        | 1              | 0                 | 1  | 6.5   |
|                         | DEO   | 1         | 0.5 | 0  | 1  | 1                  | 1                 | 0        | 1              | 0                 | 1  | 6.5   |

**Appendix 1** to Espinoza Oyarce DA, Shaw ME, Alateeq K, et al. Volumetric brain differences in clinical depression in association with anxiety: a systematic review with meta-analysis. *J Psychiatry Neurosci* 2020.  
DOI: 10.1503/jpn.190156

Online appendices are unedited and posted as supplied by the authors.

**Supplemental Table S4. Meta-analysis results per brain region**

k: number of samples or subsamples, n: total number of participants, HC: healthy controls, DEP: depressed participants, M: males, F: females, MD: mean difference, SE: standard error, CI: confidence interval, Qp: Q-statistic p-value,  $\tau^2$ : variance of true effects,  $I^2$ : proportion real differences between studies, TBV: total brain, GMV: grey matter, WMV: white matter, ICV: intracranial, THcV: total hippocampus, RHcV: right hippocampus, LHcV: left hippocampus, TAV: total amygdala, RAV: right amygdala, LAV: left amygdala, TPuV: total putamen, RPuV: right putamen, LPuV: left putamen, TCV: total caudate, RCV: right caudate, LCV: left caudate, TPaV: total pallidum, RPaV: right pallidum, LPaV: left pallidum, TTV: total thalamus, RTV: right thalamus, LTV: left thalamus, TAoV: total accumbens volumes, Mix: heterogeneous group of depressed, EO: early-onset depression, LO: late-onset depression, FE: first episode, ME: multiple episodes, noMed: not taking antidepressants, Med: taking antidepressants, TR: treatment-resistant depression, Rem: depression in remission, Cur: currently in depression. Bold font indicates significance at  $p \leq 0.05$  and  $I^2 > 50\%$ .

| Region | Analysis      | Studies | k  | Number of subjects |                  |                  | Age (years) |       | Meta-analysis results |        |         |        |       |                   |         |               |  |
|--------|---------------|---------|----|--------------------|------------------|------------------|-------------|-------|-----------------------|--------|---------|--------|-------|-------------------|---------|---------------|--|
|        |               |         |    | Total              | HC               | DEP              | HC          | DEP   | MD                    | SE     | 95% CI  | p      | Qp    | $\tau^2$          | $I^2$   |               |  |
| TBV    | HC vs DEP     | 27      | 37 | 2618               | 1123             | 1495             | 50.73       | 53.19 | -1.506                | 4.127  | -9.595  | 6.583  | 0.715 | 0.279             | 0.000   | 0.00%         |  |
|        |               |         |    |                    | (M: 391, F: 732) | (M: 496, F: 999) |             |       |                       |        |         |        |       |                   |         |               |  |
|        | HC vs DEP-Mix | 12      | 13 | 1233               | 524              | 709              | 56.76       | 61.08 | 8.375                 | 6.116  | -3.612  | 20.361 | 0.171 | 0.183             | 0.000   | 0.00%         |  |
|        |               |         |    |                    | (M: 183, F: 341) | (M: 221, F: 488) |             |       |                       |        |         |        |       |                   |         |               |  |
|        | HC vs DEP-EO  | 6       | 6  | 370                | 208              | 162              | 65.18       | 66.12 | 2.201                 | 11.192 | -19.734 | 24.136 | 0.844 | 0.849             | 0.000   | 0.00%         |  |
|        |               |         |    |                    | (M: 53, F: 155)  | (M: 31, F: 131)  |             |       |                       |        |         |        |       |                   |         |               |  |
|        | HC vs DEP-LO  | 7       | 7  | 413                | 220              | 193              | 69.97       | 71.55 | 16.391                | 12.855 | -8.805  | 41.587 | 0.202 | <b>&lt;0.0001</b> | 688.646 | <b>71.95%</b> |  |
|        |               |         |    | (M: 66, F: 154)    | (M: 70, F: 123)  |                  |             |       |                       |        |         |        |       |                   |         |               |  |
|        | HC vs DEP-Rem | 4       | 4  | 261                | 151              | 110              | 37.87       | 41.22 | 7.234                 | 16.222 | -24.561 | 39.029 | 0.656 | 0.926             | 0.000   | 0.00%         |  |
|        |               |         |    | (M: 48, F: 103)    | (M: 23, F: 87)   |                  |             |       |                       |        |         |        |       |                   |         |               |  |
|        | HC vs DEP-Cur | 4       | 4  | 617                | 295              | 322              | 52.70       | 61.27 | -7.031                | 10.479 | -27.570 | 13.508 | 0.502 | 0.938             | 0.000   | 0.00%         |  |



**Appendix 1** to Espinoza Oyarce DA, Shaw ME, Alateeq K, et al. Volumetric brain differences in clinical depression in association with anxiety: a systematic review with meta-analysis. *J Psychiatry Neurosci* 2020. DOI: 10.1503/jpn.190156

Online appendices are unedited and posted as supplied by the authors.

| Region     | Analysis             | Studies | k  | Number of subjects |                           |                           | Age (years) |       | Meta-analysis results |        |         |        |              |          |                |               |
|------------|----------------------|---------|----|--------------------|---------------------------|---------------------------|-------------|-------|-----------------------|--------|---------|--------|--------------|----------|----------------|---------------|
|            |                      |         |    | Total              | HC<br>(M: 103, F: 192)    | DEP<br>(M: 109, F: 213)   | HC          | DEP   | MD                    | SE     | 95% CI  | p      | Qp           | $\tau^2$ | I <sup>2</sup> |               |
| <b>GMV</b> | <b>HC vs DEP</b>     | 15      | 19 | 1788               | 823<br>(M: 372, F: 451)   | 965<br>(M: 392, F: 573)   | 39.77       | 41.72 | 5.541                 | 2.437  | 0.765   | 10.318 | <b>0.023</b> | 0.276    | 0.000          | 0.00%         |
| <b>GMV</b> | HC vs DEP-Mix        | 4       | 4  | 512                | 261<br>(M: 109, F: 152)   | 251<br>(M: 98, F: 153)    | 42.88       | 42.46 | 1.999                 | 5.425  | -8.633  | 12.632 | 0.712        | 0.607    | 0.000          | 0.00%         |
|            | HC vs DEP-FE         | 5       | 5  | 415                | 224<br>(M: 95, F: 129)    | 191<br>(M: 76, F: 115)    | 36.72       | 36.94 | 6.125                 | 4.440  | -2.578  | 14.827 | 0.168        | 0.546    | 0.000          | 0.00%         |
|            | HC vs DEP-TR         | 3       | 3  | 421                | 175<br>(M: 94, F: 81)     | 246<br>(M: 121, F: 125)   | 38.73       | 42.59 | 10.666                | 8.021  | -5.054  | 26.387 | 0.184        | 0.136    | 93.016         | 47.89%        |
| <b>WMV</b> | HC vs DEP            | 10      | 12 | 1245               | 508<br>(M: 221, F: 287)   | 737<br>(M: 313, F: 424)   | 44.66       | 44.42 | -2.351                | 3.377  | -8.969  | 4.267  | 0.486        | 0.217    | 12.782         | 9.34%         |
|            | HC vs DEP-Mix        | 3       | 3  | 460                | 239<br>(M: 104, F: 135)   | 221<br>(M: 91, F: 130)    | 40.35       | 38.62 | -0.346                | 5.599  | -11.320 | 10.628 | 0.951        | 0.687    | 0.000          | 0.00%         |
|            | HC vs DEP-FE         | 3       | 3  | 226                | 108<br>(M: 41, F: 67)     | 118<br>(M: 47, F: 71)     | 39.08       | 37.56 | 6.645                 | 9.677  | -12.323 | 25.612 | 0.492        | 0.237    | 75.471         | 25.98%        |
| <b>ICV</b> | HC vs DEP            | 42      | 59 | 3775               | 1728<br>(M: 618, F: 1110) | 2047<br>(M: 691, F: 1356) | 48.86       | 51.07 | 5.806                 | 4.516  | -3.045  | 14.658 | 0.199        | 0.069    | 220.756        | 21.38%        |
|            | <b>HC vs DEP-Mix</b> | 25      | 25 | 2235               | 1080<br>(M: 383, F: 697)  | 1155<br>(M: 364, F: 791)  | 50.51       | 54.79 | 11.731                | 5.838  | 0.288   | 23.173 | <b>0.045</b> | 0.278    | 121.417        | <b>15.50%</b> |
|            | HC vs DEP-EO         | 5       | 5  | 434                | 274<br>(M: 80, F: 194)    | 160<br>(M: 23, F: 137)    | 56.56       | 57.37 | 5.162                 | 18.859 | -31.800 | 42.125 | 0.784        | 0.106    | 839.154        | 48.09%        |
|            | HC vs DEP-LO         | 3       | 3  | 198                | 110<br>(M: 38, F: 72)     | 88<br>(M: 26, F: 62)      | 71.76       | 74.29 | 13.652                | 18.797 | -23.189 | 50.492 | 0.468        | 0.542    | 0.000          | 0.00%         |
|            | HC vs DEP-FE         | 4       | 4  | 337                | 231                       | 106                       | 36.53       | 39.57 | 8.328                 | 18.012 | -26.975 | 43.631 | 0.644        | 0.268    | 327.309        | 23.99%        |

**Appendix 1** to Espinoza Oyarce DA, Shaw ME, Alateeq K, et al. Volumetric brain differences in clinical depression in association with anxiety: a systematic review with meta-analysis. *J Psychiatry Neurosci* 2020.  
DOI: 10.1503/jpn.190156

Online appendices are unedited and posted as supplied by the authors.

| Region      | Analysis             | Studies | k  | Number of subjects |                        | Age (years)           |       | Meta-analysis results |         |        |         |        |                   |                   |                |               |
|-------------|----------------------|---------|----|--------------------|------------------------|-----------------------|-------|-----------------------|---------|--------|---------|--------|-------------------|-------------------|----------------|---------------|
|             |                      |         |    | Total              | HC<br>(M: 102, F: 129) | DEP<br>(M: 37, F: 69) | HC    | DEP                   | MD      | SE     | 95% CI  | p      | Qp                | $\tau^2$          | I <sup>2</sup> |               |
|             | HC vs DEP-ME         | 4       | 4  | 493                | 320                    | 173                   | 35.78 | 47.09                 | 22.036  | 20.536 | -18.214 | 62.286 | 0.283             | 0.062             | 919.847        | <b>56.87%</b> |
|             | HC vs DEP-noMed      | 6       | 6  | 302                | 176                    | 126                   | 44.98 | 44.94                 | -18.519 | 16.384 | -50.630 | 13.592 | 0.258             | 0.666             | 0.000          | 0.00%         |
|             |                      |         |    |                    | (M: 61, F: 115)        | (M: 37, F: 89)        |       |                       |         |        |         |        |                   |                   |                |               |
| <b>ICV</b>  | HC vs DEP-Med        | 4       | 4  | 192                | 137                    | 55                    | 46.32 | 42.99                 | -0.831  | 23.732 | -47.345 | 45.683 | 0.972             | 0.977             | 0.000          | 0.00%         |
|             | HC vs DEP-TR         | 3       | 3  | 366                | 138                    | 228                   | 40.36 | 43.18                 | -0.749  | 18.685 | -37.371 | 35.874 | 0.968             | 0.987             | 0.000          | 0.00%         |
|             | HC vs DEP-Rem        | 3       | 5  | 266                | 140                    | 126                   | 53.47 | 49.54                 | -14.587 | 14.135 | -42.291 | 13.116 | 0.302             | 0.310             | 0.000          | 0.00%         |
|             | HC vs DEP-Cur        | 5       | 5  | 386                | 210                    | 176                   | 56.51 | 53.37                 | -6.795  | 19.324 | -44.670 | 31.079 | 0.725             | 0.125             | 627.956        | 34.19%        |
|             |                      |         |    |                    | (M: 61, F: 77)         | (M: 106, F: 122)      |       |                       |         |        |         |        |                   |                   |                |               |
|             |                      |         |    |                    | (M: 44, F: 96)         | (M: 55, F: 71)        |       |                       |         |        |         |        |                   |                   |                |               |
|             |                      |         |    |                    | (M: 68, F: 142)        | (M: 59, F: 117)       |       |                       |         |        |         |        |                   |                   |                |               |
| <b>THcV</b> | <b>HC vs DEP</b>     | 42      | 61 | 3879               | 1737                   | 2142                  | 44.60 | 47.84                 | 0.202   | 0.040  | 0.123   | 0.281  | <b>&lt;0.0001</b> | <b>&lt;0.0001</b> | 0.072          | <b>86.58%</b> |
|             | <b>HC vs DEP-Mix</b> | 24      | 26 | 1826               | 881                    | 945                   | 46.13 | 50.79                 | 0.267   | 0.059  | 0.150   | 0.383  | <b>&lt;0.0001</b> | <b>&lt;0.0001</b> | 0.071          | <b>83.25%</b> |
|             | HC vs DEP-EO         | 4       | 4  | 344                | 197                    | 147                   | 69.18 | 68.32                 | 0.153   | 0.096  | -0.035  | 0.340  | 0.111             | 0.087             | 0.019          | <b>53.55%</b> |
|             | <b>HC vs DEP-LO</b>  | 7       | 7  | 488                | 266                    | 222                   | 67.13 | 68.07                 | 0.347   | 0.100  | 0.151   | 0.543  | <b>0.001</b>      | <b>&lt;0.0001</b> | 0.049          | <b>77.86%</b> |
|             | HC vs DEP-FE         | 7       | 8  | 497                | 310                    | 187                   | 35.66 | 37.50                 | 0.105   | 0.108  | -0.106  | 0.316  | 0.329             | <b>0.001</b>      | 0.064          | <b>73.46%</b> |
|             |                      |         |    |                    | (M: 651, F: 1086)      | (M: 788, F: 1354)     |       |                       |         |        |         |        |                   |                   |                |               |
|             |                      |         |    |                    | (M: 324, F: 557)       | (M: 334, F: 611)      |       |                       |         |        |         |        |                   |                   |                |               |
|             |                      |         |    |                    | (M: 44, F: 153)        | (M: 26, F: 121)       |       |                       |         |        |         |        |                   |                   |                |               |
|             |                      |         |    |                    | (M: 73, F: 193)        | (M: 67, F: 155)       |       |                       |         |        |         |        |                   |                   |                |               |
|             |                      |         |    |                    | (M: 140, F: 170)       | (M: 75, F: 112)       |       |                       |         |        |         |        |                   |                   |                |               |

**Appendix 1** to Espinoza Oyarce DA, Shaw ME, Alateeq K, et al. Volumetric brain differences in clinical depression in association with anxiety: a systematic review with meta-analysis. *J Psychiatry Neurosci* 2020. DOI: 10.1503/jpn.190156

Online appendices are unedited and posted as supplied by the authors.

| Region      | Analysis             | Studies | k  | Number of subjects |                  |                   | Age (years) |       | Meta-analysis results |       |        |       |                   |                   |          |                |
|-------------|----------------------|---------|----|--------------------|------------------|-------------------|-------------|-------|-----------------------|-------|--------|-------|-------------------|-------------------|----------|----------------|
|             |                      |         |    | Total              | HC               | DEP               | HC          | DEP   | MD                    | SE    | 95% CI |       | p                 | Qp                | $\tau^2$ | I <sup>2</sup> |
|             | <b>HC vs DEP-ME</b>  | 4       | 5  | 500                | 316              | 184               | 35.10       | 47.02 | 0.320                 | 0.091 | 0.141  | 0.499 | <b>0.001</b>      | <b>0.011</b>      | 0.024    | <b>68.43%</b>  |
|             | HC vs DEP-no Med     | 3       | 3  | 138                | 74               | 64                | 39.61       | 37.43 | 0.121                 | 0.168 | -0.209 | 0.451 | 0.471             | 0.084             | 0.049    | <b>59.43%</b>  |
|             | HC vs DEP TR         | 3       | 3  | 352                | 130              | 222               | 37.77       | 42.74 | 0.546                 | 0.284 | -0.011 | 1.103 | 0.055             | <b>&lt;0.0001</b> | 0.207    | <b>96.82%</b>  |
|             | HC vs DEP-Rem        | 6       | 8  | 603                | 364              | 239               | 44.00       | 46.10 | -0.022                | 0.050 | -0.121 | 0.076 | 0.657             | 0.841             | 0.000    | 0.00%          |
|             |                      |         |    |                    | (M: 153, F: 163) | (M: 69, F: 115)   |             |       |                       |       |        |       |                   |                   |          |                |
|             |                      |         |    |                    | (M: 25, F: 49)   | (M: 19, F: 45)    |             |       |                       |       |        |       |                   |                   |          |                |
|             |                      |         |    |                    | (M: 63, F: 67)   | (M: 112, F: 110)  |             |       |                       |       |        |       |                   |                   |          |                |
|             |                      |         |    |                    | (M: 132, F: 232) | (M: 91, F: 148)   |             |       |                       |       |        |       |                   |                   |          |                |
| <b>THcV</b> | HC vs DEP-Cur        | 7       | 7  | 967                | 464              | 503               | 46.34       | 52.47 | 0.108                 | 0.078 | -0.044 | 0.260 | 0.162             | <b>0.010</b>      | 0.025    | <b>64.83%</b>  |
|             |                      |         |    |                    | (M: 184, F: 280) | (M: 191, F: 312)  |             |       |                       |       |        |       |                   |                   |          |                |
| <b>RHcV</b> | <b>HC vs DEP</b>     | 34      | 50 | 3447               | 1544             | 1903              | 44.35       | 47.86 | 0.114                 | 0.023 | 0.069  | 0.159 | <b>&lt;0.0001</b> | <b>&lt;0.0001</b> | 0.017    | <b>76.61%</b>  |
|             |                      |         |    |                    | (M: 579, F: 965) | (M: 700, F: 1203) |             |       |                       |       |        |       |                   |                   |          |                |
|             | <b>HC vs DEP-Mix</b> | 20      | 21 | 1594               | 783              | 811               | 45.91       | 50.55 | 0.137                 | 0.031 | 0.075  | 0.198 | <b>&lt;0.0001</b> | <b>&lt;0.0001</b> | 0.013    | <b>68.44%</b>  |
|             |                      |         |    |                    | (M: 287, F: 496) | (M: 280, F: 531)  |             |       |                       |       |        |       |                   |                   |          |                |
|             | <b>HC vs DEP-EO</b>  | 4       | 4  | 344                | 197              | 147               | 69.18       | 68.32 | 0.118                 | 0.054 | 0.012  | 0.223 | <b>0.029</b>      | 0.133             | 0.005    | 44.34%         |
|             |                      |         |    |                    | (M: 44, F: 153)  | (M: 26, F: 121)   |             |       |                       |       |        |       |                   |                   |          |                |
|             | <b>HC vs DEP-LO</b>  | 6       | 6  | 451                | 244              | 207               | 66.78       | 67.73 | 0.204                 | 0.061 | 0.085  | 0.323 | <b>0.001</b>      | <b>0.047</b>      | 0.011    | <b>54.43%</b>  |
|             |                      |         |    |                    | (M: 73, F: 171)  | (M: 67, F: 140)   |             |       |                       |       |        |       |                   |                   |          |                |
|             | HC vs DEP-FE         | 7       | 8  | 497                | 310              | 187               | 35.66       | 37.50 | 0.047                 | 0.062 | -0.074 | 0.168 | 0.444             | <b>0.012</b>      | 0.017    | <b>61.02%</b>  |
|             |                      |         |    |                    | (M: 140, F: 170) | (M: 75, F: 112)   |             |       |                       |       |        |       |                   |                   |          |                |
|             | <b>HC vs DEP-ME</b>  | 4       | 5  | 500                | 316              | 184               | 35.10       | 47.02 | 0.183                 | 0.030 | 0.125  | 0.242 | <b>&lt;0.0001</b> | 0.206             | 0.000    | 5.69%          |
|             |                      |         |    |                    | (M: 153, F: 163) | (M: 69, F: 115)   |             |       |                       |       |        |       |                   |                   |          |                |
|             | HC vs DEP-Rem        | 6       | 8  | 603                | 364              | 239               | 44.00       | 46.10 | -0.020                | 0.033 | -0.085 | 0.046 | 0.558             | 0.932             | 0.000    | 0.00%          |
|             |                      |         |    |                    | (M: 132, F: 232) | (M: 91, F: 148)   |             |       |                       |       |        |       |                   |                   |          |                |

**Appendix 1** to Espinoza Oyarce DA, Shaw ME, Alateeq K, et al. Volumetric brain differences in clinical depression in association with anxiety: a systematic review with meta-analysis. *J Psychiatry Neurosci* 2020. DOI: 10.1503/jpn.190156

Online appendices are unedited and posted as supplied by the authors.

| Region | Analysis             | Studies | k  | Number of subjects |                          |                           | Age (years) |       | Meta-analysis results |       |        |       |         |          |                |        |
|--------|----------------------|---------|----|--------------------|--------------------------|---------------------------|-------------|-------|-----------------------|-------|--------|-------|---------|----------|----------------|--------|
|        |                      |         |    | Total              | HC                       | DEP                       | HC          | DEP   | MD                    | SE    | 95% CI | p     | Qp      | $\tau^2$ | I <sup>2</sup> |        |
|        | HC vs DEP-Cur        | 5       | 5  | 847                | 409<br>(M: 155, F: 254)  | 438<br>(M: 167, F: 271)   | 47.53       | 54.69 | 0.052                 | 0.047 | -0.040 | 0.144 | 0.268   | 0.137    | 0.004          | 40.92% |
| LHcV   | <b>HC vs DEP</b>     | 34      | 50 | 3447               | 1544<br>(M: 579, F: 965) | 1903<br>(M: 700, F: 1203) | 44.35       | 47.86 | 0.105                 | 0.023 | 0.060  | 0.150 | <0.0001 | <0.0001  | 0.017          | 77.01% |
|        | <b>HC vs DEP-Mix</b> | 20      | 21 | 1594               | 783<br>(M: 287, F: 496)  | 811<br>(M: 280, F: 531)   | 45.91       | 50.55 | 0.133                 | 0.031 | 0.071  | 0.194 | <0.0001 | <0.0001  | 0.013          | 67.97% |
|        | HC vs DEP-EO         | 4       | 4  | 344                | 197<br>(M: 44, F: 153)   | 147<br>(M: 26, F: 121)    | 69.18       | 68.32 | 0.051                 | 0.041 | -0.030 | 0.132 | 0.214   | 0.306    | 0.001          | 14.68% |
|        | <b>HC vs DEP-LO</b>  | 6       | 6  | 451                | 244<br>(M: 73, F: 171)   | 207<br>(M: 67, F: 140)    | 66.78       | 67.73 | 0.176                 | 0.049 | 0.081  | 0.271 | 0.0003  | 0.183    | 0.005          | 34.90% |
| LHcV   | HC vs DEP-FE         | 7       | 8  | 497                | 310<br>(M: 140, F: 170)  | 187<br>(M: 75, F: 112)    | 35.66       | 37.50 | 0.068                 | 0.052 | -0.033 | 0.169 | 0.188   | 0.040    | 0.011          | 52.77% |
|        | <b>HC vs DEP-ME</b>  | 4       | 5  | 500                | 316<br>(M: 153, F: 163)  | 184<br>(M: 69, F: 115)    | 35.10       | 47.02 | 0.121                 | 0.054 | 0.015  | 0.227 | 0.025   | 0.023    | 0.008          | 62.41% |
|        | HC vs DEP-Rem        | 6       | 8  | 603                | 364<br>(M: 132, F: 232)  | 239<br>(M: 91, F: 148)    | 44.00       | 46.10 | -0.001                | 0.034 | -0.067 | 0.065 | 0.981   | 0.789    | 0.000          | 0.00%  |
|        | HC vs DEP-Cur        | 5       | 5  | 847                | 409<br>(M: 155, F: 254)  | 438<br>(M: 167, F: 271)   | 47.53       | 54.69 | 0.042                 | 0.048 | -0.052 | 0.136 | 0.379   | 0.129    | 0.005          | 46.31% |
| TAV    | HC vs DEP            | 15      | 25 | 1181               | 463<br>(M: 167, F: 296)  | 718<br>(M: 287, F: 431)   | 46.31       | 47.12 | 0.091                 | 0.061 | -0.029 | 0.211 | 0.139   | <0.0001  | 0.081          | 90.25% |
|        | HC vs DEP-Mix        | 6       | 6  | 362                | 167<br>(M: 52, F: 115)   | 195<br>(M: 59, F: 136)    | 46.77       | 50.08 | 0.018                 | 0.087 | -0.153 | 0.188 | 0.203   | 0.001    | 0.035          | 78.81% |
|        | HC vs DEP-FE         | 3       | 3  | 177                | 91                       | 86                        | 35.46       | 35.72 | -0.146                | 0.182 | -0.503 | 0.211 | 0.424   | <0.0001  | 0.087          | 89.00% |

**Appendix 1** to Espinoza Oyarce DA, Shaw ME, Alateeq K, et al. Volumetric brain differences in clinical depression in association with anxiety: a systematic review with meta-analysis. *J Psychiatry Neurosci* 2020.  
DOI: 10.1503/jpn.190156

Online appendices are unedited and posted as supplied by the authors.

| Region     | Analysis      | Studies | k  | Number of subjects |                         | Age (years)             |       | Meta-analysis results |        |       |        |       |       |                   |                |               |
|------------|---------------|---------|----|--------------------|-------------------------|-------------------------|-------|-----------------------|--------|-------|--------|-------|-------|-------------------|----------------|---------------|
|            |               |         |    | Total              | HC<br>(M: 43, F: 48)    | DEP<br>(M: 40, F: 46)   | HC    | DEP                   | MD     | SE    | 95% CI | p     | Qp    | $\tau^2$          | I <sup>2</sup> |               |
|            | HC vs DEP-Rem | 5       | 7  | 274                | 138<br>(M: 47, F: 91)   | 136<br>(M: 47, F: 89)   | 40.95 | 40.50                 | -0.035 | 0.049 | -0.131 | 0.060 | 0.470 | 0.075             | 0.007          | 42.17%        |
|            | HC vs DEP-Cur | 4       | 4  | 193                | 103<br>(M: 42, F: 61)   | 90<br>(M: 25, F: 65)    | 36.81 | 36.88                 | -0.025 | 0.092 | -0.204 | 0.155 | 0.788 | 0.122             | 0.017          | <b>50.56%</b> |
| <b>RAV</b> | HC vs DEP     | 13      | 23 | 1071               | 427<br>(M: 150, F: 277) | 644<br>(M: 267, F: 377) | 46.48 | 47.26                 | 0.044  | 0.029 | -0.014 | 0.101 | 0.136 | <b>&lt;0.0001</b> | 0.014          | <b>77.75%</b> |
|            | HC vs DEP-Mix | 5       | 5  | 301                | 151<br>(M: 45, F: 106)  | 150<br>(M: 44, F: 106)  | 45.81 | 49.51                 | 0.001  | 0.035 | -0.067 | 0.069 | 0.985 | 0.191             | 0.002          | 31.11%        |
|            | HC vs DEP-FE  | 3       | 3  | 177                | 91<br>(M: 43, F: 48)    | 86<br>(M: 40, F: 46)    | 35.46 | 35.72                 | -0.074 | 0.087 | -0.244 | 0.096 | 0.396 | <b>0.017</b>      | 0.016          | <b>73.80%</b> |
|            | HC vs DEP-Rem | 5       | 7  | 274                | 138<br>(M: 47, F: 91)   | 136<br>(M: 47, F: 89)   | 40.95 | 40.50                 | -0.016 | 0.024 | -0.064 | 0.032 | 0.510 | 0.632             | 0.000          | 0.12%         |
| <b>RAV</b> | HC vs DEP-Cur | 3       | 3  | 144                | 83<br>(M: 32, F: 51)    | 61<br>(M: 20, F: 41)    | 37.25 | 37.11                 | -0.032 | 0.038 | -0.106 | 0.043 | 0.402 | 0.830             | 0.000          | 0.00%         |
| <b>LAV</b> | HC vs DEP     | 13      | 23 | 1071               | 427<br>(M: 150, F: 277) | 644<br>(M: 267, F: 377) | 46.48 | 47.26                 | 0.026  | 0.035 | -0.042 | 0.095 | 0.453 | <b>&lt;0.0001</b> | 0.022          | <b>84.24%</b> |
|            | HC vs DEP-Mix | 5       | 5  | 301                | 151<br>(M: 45, F: 106)  | 150<br>(M: 44, F: 106)  | 45.81 | 49.51                 | -0.013 | 0.053 | -0.117 | 0.090 | 0.803 | <b>0.008</b>      | 0.010          | <b>72.34%</b> |
|            | HC vs DEP-FE  | 3       | 3  | 177                | 91<br>(M: 43, F: 48)    | 86<br>(M: 40, F: 46)    | 35.46 | 35.72                 | -0.064 | 0.099 | -0.257 | 0.130 | 0.521 | <b>0.001</b>      | 0.024          | <b>82.32%</b> |
|            | HC vs DEP-Rem | 5       | 7  | 274                | 138<br>(M: 47, F: 91)   | 136<br>(M: 47, F: 89)   | 40.95 | 40.50                 | -0.027 | 0.033 | -0.091 | 0.038 | 0.418 | 0.118             | 0.003          | 36.44%        |

**Appendix 1** to Espinoza Oyarce DA, Shaw ME, Alateeq K, et al. Volumetric brain differences in clinical depression in association with anxiety: a systematic review with meta-analysis. *J Psychiatry Neurosci* 2020.  
DOI: 10.1503/jpn.190156

*Online appendices are unedited and posted as supplied by the authors.*

| Region | Analysis      | Studies | k  | Number of subjects |                         |                         | Age (years) |       | Meta-analysis results |       |        |       |              |               |                |               |
|--------|---------------|---------|----|--------------------|-------------------------|-------------------------|-------------|-------|-----------------------|-------|--------|-------|--------------|---------------|----------------|---------------|
|        |               |         |    | Total              | HC                      | DEP                     | HC          | DEP   | MD                    | SE    | 95% CI | p     | Qp           | $\tau^2$      | I <sup>2</sup> |               |
|        | HC vs DEP-Cur | 3       | 3  | 144                | 83<br>(M: 32, F: 51)    | 61<br>(M: 20, F: 41)    | 37.25       | 37.11 | -0.059                | 0.037 | -0.132 | 0.013 | 0.109        | 0.878         | 0.000          | 0.00%         |
| TPuV   | HC vs DEP     | 13      | 20 | 1693               | 716<br>(M: 256, F: 460) | 977<br>(M: 382, F: 595) | 44.09       | 47.59 | 0.212                 | 0.075 | 0.065  | 0.359 | <b>0.005</b> | <b>0.0001</b> | 0.059          | <b>59.70%</b> |
|        | HC vs DEP-Mix | 8       | 8  | 856                | 375<br>(M: 116, F: 259) | 481<br>(M: 156, F: 325) | 48.43       | 54.61 | 0.203                 | 0.074 | 0.058  | 0.348 | <b>0.006</b> | 0.653         | 0.000          | 0.00%         |
| RPuV   | HC vs DEP     | 9       | 15 | 1248               | 518<br>(M: 192, F: 326) | 730<br>(M: 316, F: 414) | 45.97       | 49.14 | 0.088                 | 0.044 | 0.002  | 0.175 | <b>0.046</b> | 0.085         | 0.010          | 37.43%        |
|        | HC vs DEP-Mix | 5       | 5  | 524                | 224<br>(M: 70, F: 154)  | 300<br>(M: 109, F: 191) | 53.66       | 61.13 | 0.094                 | 0.062 | -0.028 | 0.215 | 0.131        | 0.857         | 0.000          | 0.00%         |
| LPuV   | HC vs DEP     | 9       | 15 | 1248               | 518<br>(M: 192, F: 326) | 730<br>(M: 316, F: 414) | 45.97       | 49.14 | 0.081                 | 0.047 | -0.010 | 0.173 | 0.081        | 0.072         | 0.011          | 39.47%        |
|        | HC vs DEP-Mix | 5       | 5  | 524                | 224<br>(M: 70, F: 154)  | 300<br>(M: 109, F: 191) | 53.66       | 61.13 | 0.071                 | 0.059 | -0.044 | 0.187 | 0.226        | 0.734         | 0.000          | 0.00%         |
| TCV    | HC vs DEP     | 13      | 20 | 1686               | 697<br>(M: 257, F: 440) | 989<br>(M: 377, F: 612) | 43.41       | 48.00 | 0.031                 | 0.059 | -0.085 | 0.147 | 0.597        | <b>0.005</b>  | 0.031          | <b>51.88%</b> |
| TCV    | HC vs DEP-Mix | 8       | 8  | 849                | 356<br>(M: 117, F: 239) | 493<br>(M: 151, F: 342) | 47.33       | 55.26 | 0.140                 | 0.086 | -0.028 | 0.308 | 0.102        | 0.243         | 0.016          | 28.16%        |
| RCV    | HC vs DEP     | 9       | 15 | 1241               | 499<br>(M: 193, F: 306) | 742<br>(M: 311, F: 431) | 45.09       | 49.67 | 0.017                 | 0.036 | -0.053 | 0.086 | 0.635        | 0.106         | 0.006          | 33.31%        |
|        | HC vs DEP-Mix | 5       | 5  | 517                | 205<br>(M: 71, F: 134)  | 312<br>(M: 104, F: 208) | 52.23       | 61.91 | 0.060                 | 0.051 | -0.039 | 0.160 | 0.235        | 0.378         | 0.000          | 1.71%         |
| LCV    | HC vs DEP     | 9       | 15 | 1241               | 499<br>(M: 193, F: 306) | 742<br>(M: 311, F: 431) | 45.09       | 49.67 | 0.021                 | 0.032 | -0.041 | 0.083 | 0.507        | 0.129         | 0.004          | 25.39%        |

**Appendix 1** to Espinoza Oyarce DA, Shaw ME, Alateeq K, et al. Volumetric brain differences in clinical depression in association with anxiety: a systematic review with meta-analysis. *J Psychiatry Neurosci* 2020.  
DOI: 10.1503/jpn.190156

Online appendices are unedited and posted as supplied by the authors.

| Region | Analysis      | Studies | k  | Number of subjects |                         |                         | Age (years) |       | Meta-analysis results |       |        |       |                   |                   |                |               |
|--------|---------------|---------|----|--------------------|-------------------------|-------------------------|-------------|-------|-----------------------|-------|--------|-------|-------------------|-------------------|----------------|---------------|
|        |               |         |    | Total              | HC                      | DEP                     | HC          | DEP   | MD                    | SE    | 95% CI | p     | Qp                | $\tau^2$          | I <sup>2</sup> |               |
|        | HC vs DEP-Mix | 5       | 5  | 517                | 205<br>(M: 71, F: 134)  | 312<br>(M: 104, F: 208) | 52.23       | 61.91 | 0.080                 | 0.053 | -0.024 | 0.184 | 0.130             | 0.225             | 0.003          | 24.11%        |
| TPaV   | HC vs DEP     | 9       | 16 | 1231               | 546<br>(M: 209, F: 337) | 685<br>(M: 298, F: 387) | 40.29       | 42.70 | 0.051                 | 0.028 | -0.004 | 0.106 | 0.070             | <b>0.0001</b>     | 0.008          | <b>67.88%</b> |
|        | HC vs DEP-Mix | 5       | 5  | 494                | 252<br>(M: 87, F: 165)  | 242<br>(M: 83, F: 159)  | 40.49       | 44.86 | 0.044                 | 0.038 | -0.031 | 0.118 | 0.248             | 0.183             | 0.003          | 38.94%        |
| RPaV   | HC vs DEP     | 7       | 13 | 947                | 411<br>(M: 170, F: 241) | 536<br>(M: 258, F: 278) | 40.75       | 42.54 | 0.028                 | 0.020 | -0.012 | 0.068 | 0.165             | <b>0.001</b>      | 0.003          | <b>64.66%</b> |
|        | HC vs DEP-Mix | 3       | 3  | 223                | 117<br>(M: 48, F: 69)   | 106<br>(M: 51, F: 55)   | 42.35       | 49.70 | 0.054                 | 0.033 | -0.011 | 0.120 | 0.104             | 0.978             | 0.000          | 0.00%         |
| LPaV   | HC vs DEP     | 7       | 13 | 947                | 411<br>(M: 170, F: 241) | 536<br>(M: 258, F: 278) | 40.75       | 42.54 | 0.025                 | 0.015 | -0.004 | 0.054 | 0.095             | 0.144             | 0.001          | 19.16%        |
|        | HC vs DEP-Mix | 3       | 3  | 223                | 117<br>(M: 48, F: 69)   | 106<br>(M: 51, F: 55)   | 42.35       | 49.70 | 0.018                 | 0.038 | -0.056 | 0.092 | 0.631             | 0.244             | 0.001          | 25.99%        |
| TTV    | HC vs DEP     | 7       | 13 | 938                | 395<br>(M: 165, F: 230) | 543<br>(M: 251, F: 292) | 42.50       | 43.29 | 0.140                 | 0.194 | -0.242 | 0.520 | 0.473             | <b>&lt;0.0001</b> | 0.400          | <b>87.36%</b> |
|        | HC vs DEP-Mix | 3       | 3  | 214                | 101<br>(M: 43, F: 58)   | 113<br>(M: 44, F: 69)   | 49.44       | 52.85 | 0.774                 | 0.184 | 0.414  | 1.134 | <b>&lt;0.0001</b> | 0.751             | 0.000          | 0.00%         |
| RTV    | HC vs DEP     | 6       | 12 | 874                | 363<br>(M: 151, F: 212) | 511<br>(M: 237, F: 274) | 41.50       | 42.61 | 0.091                 | 0.097 | -0.100 | 0.281 | 0.351             | <b>&lt;0.0001</b> | 0.081          | <b>76.54%</b> |
| LTV    | HC vs DEP     | 6       | 12 | 874                | 363<br>(M: 151, F: 212) | 511<br>(M: 237, F: 274) | 41.50       | 42.61 | 0.036                 | 0.098 | -0.156 | 0.227 | 0.715             | <b>&lt;0.0001</b> | 0.076          | <b>73.60%</b> |
| TAcV   | HC vs DEP     | 4       | 9  | 563                | 226<br>(M: 83, F: 143)  | 337<br>(M: 136, F: 201) | 35.20       | 37.45 | -0.018                | 0.025 | -0.067 | 0.032 | 0.491             | <b>0.001</b>      | 0.004          | <b>69.57%</b> |

**Appendix 1** to Espinoza Oyarce DA, Shaw ME, Alateeq K, et al. Volumetric brain differences in clinical depression in association with anxiety: a systematic review with meta-analysis. *J Psychiatry Neurosci* 2020.  
DOI: 10.1503/jpn.190156

*Online appendices are unedited and posted as supplied by the authors.*

**Supplemental Table S5. Assessment of anxiety comorbidity per brain region**

k: number of samples or subsamples, n: total number of subjects, HC: healthy controls, DEP: depressed participants, M: males, F: females, MD: mean difference, SE: standard error, CI: confidence interval, Qp: Q-statistic p-value,  $\tau^2$ : variance of true effects,  $I^2$ : proportion real differences between studies, TBV: total brain, GMV: grey matter, WMV: white matter, ICV: intracranial, THcV: total hippocampus, RHcV: right hippocampus, LHcV: left hippocampus, TAV: total amygdala, RAV: right amygdala, LAV: left amygdala, TPuV: total putamen, RPuV: right putamen, LPuV: left putamen, TCV: total caudate, RCV: right caudate, LCV: left caudate, TPaV: total pallidum, RPaV: right pallidum, LPaV: left pallidum, TTV: total thalamus, RTV: right thalamus, LTV: left thalamus volumes, Mix: heterogeneous group of depressed, EO: early-onset depression, LO: late-onset depression, FE: first episode, ME: multiple episodes, noMed: not taking antidepressants, Med: taking antidepressants, TR: treatment-resistant depression, Rem: depression in remission, Cur: currently in depression, no ANX: no comorbidity, ANX: comorbidity. Bold font indicates significance at  $p \leq 0.05$  and  $I^2 > 50\%$ .

| Region | Analysis             | Studies | k  | Number of subjects |                         |                         | Age (years) |       | Meta-analysis results |        |         |        |       |          |       |       |
|--------|----------------------|---------|----|--------------------|-------------------------|-------------------------|-------------|-------|-----------------------|--------|---------|--------|-------|----------|-------|-------|
|        |                      |         |    | Total              | HC                      | DEP                     | HC          | DEP   | MD                    | SE     | 95% CI  | p      | Qp    | $\tau^2$ | $I^2$ |       |
| TBV    | HC vs DEP no ANX     | 10      | 13 | 1190               | 472<br>(M: 157, F: 315) | 718<br>(M: 239, F: 479) | 56.74       | 56.78 | -7.371                | 6.963  | -21.017 | 6.276  | 0.290 | 0.483    | 0.000 | 0.00% |
|        | HC vs DEP-Mix no ANX | 4       | 4  | 509                | 202<br>(M: 65, F: 137)  | 307<br>(M: 92, F: 215)  | 71.24       | 71.06 | 1.279                 | 10.776 | -19.841 | 22.400 | 0.906 | 0.860    | 0.000 | 0.00% |
|        | HC vs DEP-EO no ANX  | 3       | 3  | 205                | 104<br>(M: 35, F: 69)   | 101<br>(M: 25, F: 76)   | 71.58       | 68.05 | 9.827                 | 16.042 | -21.615 | 41.269 | 0.540 | 0.638    | 0.000 | 0.00% |
|        | HC vs DEP-LO no ANX  | 3       | 3  | 191                | 104<br>(M: 35, F: 69)   | 87<br>(M: 35, F: 52)    | 71.58       | 72.82 | 7.435                 | 15.440 | -22.828 | 37.697 | 0.630 | 0.463    | 0.000 | 0.00% |
|        | HC vs DEP ANX        | 4       | 6  | 458                | 214<br>(M: 78, F: 136)  | 244<br>(M: 83, F: 161)  | 36.02       | 36.10 | -1.866                | 10.281 | -22.015 | 18.284 | 0.856 | 0.850    | 0.000 | 0.00% |



**Appendix 1** to Espinoza Oyarce DA, Shaw ME, Alateeq K, et al. Volumetric brain differences in clinical depression in association with anxiety: a systematic review with meta-analysis. *J Psychiatry Neurosci* 2020.  
DOI: 10.1503/jpn.190156

Online appendices are unedited and posted as supplied by the authors.

| Region | Analysis               | Studies | k  | Number of subjects |                  |                  | Age (years) |       | Meta-analysis results |        |         |        |                   |                   |                |               |
|--------|------------------------|---------|----|--------------------|------------------|------------------|-------------|-------|-----------------------|--------|---------|--------|-------------------|-------------------|----------------|---------------|
|        |                        |         |    | Total              | HC               | DEP              | HC          | DEP   | MD                    | SE     | 95% CI  | p      | Qp                | $\tau^2$          | I <sup>2</sup> |               |
| GMV    | HC vs DEP no ANX       | 8       | 10 | 892                | 387              | 505              | 40.68       | 43.04 | 11.005                | 4.810  | 1.578   | 20.432 | <b>0.022</b>      | 0.547             | 22.880         | 9.86%         |
|        |                        |         |    |                    | (M: 179, F: 208) | (M: 218, F: 287) |             |       |                       |        |         |        |                   |                   |                |               |
|        | HC vs DEP-FE no ANX    | 3       | 3  | 178                | 98               | 80               | 40.22       | 40.25 | 15.396                | 9.344  | -2.919  | 33.710 | 0.099             | 0.439             | 0.000          | 0.00%         |
|        |                        |         |    |                    | (M: 55, F: 43)   | (M: 37, F: 43)   |             |       |                       |        |         |        |                   |                   |                |               |
| GMV    | HC vs DEP ANX          | 5       | 6  | 742                | 375              | 367              | 37.06       | 38.11 | 3.559                 | 3.513  | -3.327  | 10.445 | 0.311             | 0.153             | 0.000          | 0.00%         |
|        |                        |         |    |                    | (M: 150, F: 225) | (M: 131, F: 236) |             |       |                       |        |         |        |                   |                   |                |               |
| WMV    | HC vs DEP no ANX       | 7       | 8  | 779                | 320              | 459              | 46.78       | 47.01 | 3.662                 | 4.126  | -4.425  | 11.749 | 0.375             | 0.486             | 0.000          | 0.00%         |
|        |                        |         |    |                    | (M: 133, F: 187) | (M: 196, F: 263) |             |       |                       |        |         |        |                   |                   |                |               |
| ICV    | HC vs DEP no ANX       | 23      | 30 | 2353               | 1083             | 1270             | 51.55       | 54.47 | 13.802                | 6.204  | 1.642   | 25.962 | <b>0.026</b>      | 0.274             | 191.157        | 17.78%        |
|        |                        |         |    |                    | (M: 391, F: 692) | (M: 421, F: 849) |             |       |                       |        |         |        |                   |                   |                |               |
|        | HC vs DEP-Mix no ANX   | 16      | 16 | 1686               | 809              | 877              | 52.24       | 57.60 | 12.765                | 7.932  | -2.782  | 28.312 | 0.108             | 0.192             | 230.603        | 24.89%        |
|        |                        |         |    |                    | (M: 299, F: 510) | (M: 282, F: 595) |             |       |                       |        |         |        |                   |                   |                |               |
|        | HC vs DEP-EO no ANX    | 4       | 4  | 365                | 233              | 132              | 55.54       | 55.95 | 21.650                | 15.926 | -9.564  | 52.864 | 0.174             | 0.451             | 0.000          | 0.00%         |
|        |                        |         |    |                    | (M: 80, F: 153)  | (M: 23, F: 109)  |             |       |                       |        |         |        |                   |                   |                |               |
|        | HC vs DEP-FE no ANX    | 3       | 3  | 282                | 197              | 85               | 34.57       | 38.38 | 20.913                | 16.023 | -10.491 | 52.317 | 0.192             | 0.328             | 0.000          | 0.00%         |
|        |                        |         |    | (M: 92, F: 105)    | (M: 30, F: 55)   |                  |             |       |                       |        |         |        |                   |                   |                |               |
|        | HC vs DEP-noMed no ANX | 3       | 3  | 134                | 82               | 52               | 35.53       | 37.70 | -37.443               | 23.304 | -83.119 | 8.233  | 0.108             | 0.650             | 0.000          | 0.00%         |
|        |                        |         |    | (M: 15, F: 67)     | (M: 13, F: 39)   |                  |             |       |                       |        |         |        |                   |                   |                |               |
|        | HC vs DEP ANX          | 9       | 16 | 654                | 270              | 384              | 39.47       | 38.87 | -4.747                | 9.293  | -22.961 | 13.467 | 0.610             | <b>0.040</b>      | 411.763        | 38.08%        |
|        |                        |         |    | (M: 92, F: 178)    | (M: 157, F: 227) |                  |             |       |                       |        |         |        |                   |                   |                |               |
|        | HC vs DEP-Mix ANX      | 5       | 5  | 325                | 167              | 158              | 37.89       | 38.66 | 4.848                 | 12.412 | -19.479 | 29.175 | 0.696             | 0.175             | 206.245        | 25.43%        |
|        |                        |         |    | (M: 50, F: 117)    | (M: 43, F: 115)  |                  |             |       |                       |        |         |        |                   |                   |                |               |
| THcV   | HC vs DEP no ANX       | 22      | 28 | 2121               | 952              | 1169             | 50.29       | 54.02 | 0.246                 | 0.058  | 0.133   | 0.360  | <b>&lt;0.0001</b> | <b>&lt;0.0001</b> | 0.073          | <b>83.74%</b> |

**Appendix 1** to Espinoza Oyarce DA, Shaw ME, Alateeq K, et al. Volumetric brain differences in clinical depression in association with anxiety: a systematic review with meta-analysis. *J Psychiatry Neurosci* 2020.  
DOI: 10.1503/jpn.190156

*Online appendices are unedited and posted as supplied by the authors.*

| Region      | Analysis                    | Studies | k  | Number of subjects |                         | Age (years)              |       | Meta-analysis results |        |       |        |       |                   |                   |                |               |
|-------------|-----------------------------|---------|----|--------------------|-------------------------|--------------------------|-------|-----------------------|--------|-------|--------|-------|-------------------|-------------------|----------------|---------------|
|             |                             |         |    | Total              | HC                      | DEP                      | HC    | DEP                   | MD     | SE    | 95% CI | p     | Qp                | $\tau^2$          | I <sup>2</sup> |               |
|             | <b>HC vs DEP-Mix no ANX</b> | 16      | 17 | 1344               | (M: 360, F: 592)<br>651 | (M: 422, F: 747)<br>693  | 50.32 | 55.09                 | 0.261  | 0.077 | 0.111  | 0.411 | <b>0.001</b>      | <b>&lt;0.0001</b> | 0.080          | <b>85.31%</b> |
|             | HC vs DEP-EO no ANX         | 3       | 3  | 275                | (M: 248, F: 403)<br>156 | (M: 251, F: 442)<br>119  | 70.97 | 69.33                 | 0.107  | 0.109 | -0.107 | 0.321 | 0.327             | 0.068             | 0.022          | <b>62.09%</b> |
|             |                             |         |    |                    | (M: 44, F: 112)         | (M: 26, F: 93)           |       |                       |        |       |        |       |                   |                   |                |               |
| <b>THcV</b> | <b>HC vs DEP-LO no ANX</b>  | 5       | 5  | 409                | (M: 66, F: 157)<br>223  | (M: 63, F: 123)<br>186   | 70.41 | 71.64                 | 0.373  | 0.099 | 0.179  | 0.567 | <b>0.0002</b>     | <b>0.027</b>      | 0.032          | <b>65.14%</b> |
| <b>THcV</b> | HC vs DEP-FE no ANX         | 6       | 6  | 441                | (M: 129, F: 151)<br>280 | (M: 62, F: 99)<br>161    | 34.93 | 37.14                 | 0.065  | 0.119 | -0.168 | 0.297 | 0.585             | <b>0.001</b>      | 0.064          | <b>77.13%</b> |
|             | HC vs DEP-Rem no ANX        | 4       | 4  | 274                | (M: 42, F: 116)<br>158  | (M: 43, F: 73)<br>116    | 55.74 | 54.16                 | -0.020 | 0.068 | -0.153 | 0.113 | 0.768             | 0.613             | 0.000          | 0.00%         |
|             | HC vs DEP ANX               | 10      | 21 | 1049               | (M: 162, F: 255)<br>417 | (M: 276, F: 356)<br>632  | 35.32 | 37.66                 | 0.105  | 0.081 | -0.054 | 0.264 | 0.197             | <b>&lt;0.0001</b> | 0.104          | <b>90.13%</b> |
|             | HC vs DEP-Mix ANX           | 4       | 4  | 228                | (M: 34, F: 79)<br>113   | (M: 40, F: 75)<br>115    | 31.69 | 35.80                 | 0.302  | 0.207 | -0.104 | 0.708 | 0.145             | <b>&lt;0.0001</b> | 0.154          | <b>91.54%</b> |
| <b>RHcV</b> | <b>HC vs DEP no ANX</b>     | 20      | 25 | 2006               | (M: 339, F: 564)<br>903 | (M: 387, F: 716)<br>1103 | 50.14 | 53.85                 | 0.134  | 0.030 | 0.075  | 0.193 | <b>&lt;0.0001</b> | <b>&lt;0.0001</b> | 0.015          | <b>69.53%</b> |
|             | <b>HC vs DEP-Mix no ANX</b> | 14      | 15 | 1229               | (M: 227, F: 375)<br>602 | (M: 216, F: 411)<br>627  | 50.10 | 54.91                 | 0.128  | 0.037 | 0.056  | 0.201 | <b>0.001</b>      | <b>0.0002</b>     | 0.013          | <b>67.88%</b> |
|             | HC vs DEP-EO no ANX         | 3       | 3  | 275                | (M: 44, F: 112)<br>156  | (M: 26, F: 93)<br>119    | 70.97 | 69.33                 | 0.084  | 0.050 | -0.015 | 0.183 | 0.094             | 0.271             | 0.002          | 28.16%        |
|             | <b>HC vs DEP-LO no ANX</b>  | 5       | 5  | 409                | (M: 66, F: 157)<br>223  | (M: 63, F: 123)<br>186   | 70.41 | 71.64                 | 0.189  | 0.061 | 0.070  | 0.308 | <b>0.002</b>      | 0.051             | 0.010          | <b>57.59%</b> |
|             | HC vs DEP-FE no ANX         | 6       | 6  | 441                | (M: 129, F: 151)<br>280 | (M: 62, F: 99)<br>161    | 34.93 | 37.14                 | 0.032  | 0.072 | -0.109 | 0.173 | 0.653             | <b>0.007</b>      | 0.021          | <b>68.74%</b> |

**Appendix 1** to Espinoza Oyarce DA, Shaw ME, Alateeq K, et al. Volumetric brain differences in clinical depression in association with anxiety: a systematic review with meta-analysis. *J Psychiatry Neurosci* 2020.  
DOI: 10.1503/jpn.190156

*Online appendices are unedited and posted as supplied by the authors.*

| Region      | Analysis                    | Studies | k  | Number of subjects |                         |                          | Age (years) |       | Meta-analysis results |       |        |       |         |          |                |        |
|-------------|-----------------------------|---------|----|--------------------|-------------------------|--------------------------|-------------|-------|-----------------------|-------|--------|-------|---------|----------|----------------|--------|
|             |                             |         |    | Total              | HC                      | DEP                      | HC          | DEP   | MD                    | SE    | 95% CI | p     | Qp      | $\tau^2$ | I <sup>2</sup> |        |
|             | HC vs DEP-Rem no ANX        | 4       | 4  | 274                | (M: 129, F: 151)<br>158 | (M: 62, F: 99)<br>116    | 55.74       | 54.16 | -0.007                | 0.044 | -0.093 | 0.079 | 0.877   | 0.645    | 0.000          | 0.00%  |
|             | HC vs DEP ANX               | 9       | 20 | 1006               | (M: 42, F: 116)<br>399  | (M: 43, F: 73)<br>607    | 35.21       | 37.78 | 0.057                 | 0.043 | -0.027 | 0.140 | 0.182   | <0.0001  | 0.023          | 81.49% |
|             | HC vs DEP-Mix ANX           | 4       | 4  | 228                | (M: 156, F: 243)<br>113 | (M: 266, F: 341)<br>115  | 31.69       | 35.80 | 0.173                 | 0.108 | -0.038 | 0.384 | 0.107   | 0.001    | 0.037          | 83.69% |
|             |                             |         |    |                    | (M: 34, F: 79)<br>113   | (M: 40, F: 75)<br>115    |             |       |                       |       |        |       |         |          |                |        |
| <b>LHcV</b> | <b>HC vs DEP no ANX</b>     | 20      | 25 | 2006               | (M: 339, F: 564)<br>903 | (M: 387, F: 716)<br>1103 | 50.14       | 53.85 | 0.124                 | 0.029 | 0.067  | 0.180 | <0.0001 | <0.0001  | 0.013          | 67.74% |
| <b>LHcV</b> | <b>HC vs DEP-Mix no ANX</b> | 14      | 15 | 1229               | (M: 227, F: 375)<br>602 | (M: 216, F: 411)<br>627  | 50.10       | 54.91 | 0.137                 | 0.034 | 0.070  | 0.204 | <0.0001 | 0.001    | 0.010          | 62.22% |
|             | HC vs DEP-EO no ANX         | 3       | 3  | 275                | (M: 44, F: 112)<br>156  | (M: 26, F: 93)<br>119    | 70.97       | 69.33 | 0.036                 | 0.053 | -0.069 | 0.141 | 0.500   | 0.181    | 0.003          | 39.69% |
|             | <b>HC vs DEP-LO no ANX</b>  | 5       | 5  | 409                | (M: 66, F: 157)<br>223  | (M: 63, F: 123)<br>186   | 70.41       | 71.64 | 0.167                 | 0.049 | 0.071  | 0.264 | 0.001   | 0.172    | 0.005          | 38.87% |
|             | HC vs DEP-FE no ANX         | 6       | 6  | 441                | (M: 129, F: 151)<br>280 | (M: 62, F: 99)<br>161    | 34.93       | 37.14 | 0.041                 | 0.049 | -0.055 | 0.137 | 0.406   | 0.165    | 0.005          | 34.46% |
|             | HC vs DEP-Rem no ANX        | 4       | 4  | 274                | (M: 42, F: 116)<br>158  | (M: 43, F: 73)<br>116    | 55.74       | 54.16 | -0.002                | 0.043 | -0.086 | 0.082 | 0.962   | 0.533    | 0.000          | 0.00%  |
|             | HC vs DEP ANX               | 9       | 20 | 1006               | (M: 156, F: 243)<br>399 | (M: 266, F: 341)<br>607  | 35.21       | 37.78 | 0.073                 | 0.044 | -0.013 | 0.159 | 0.096   | <0.0001  | 0.026          | 83.45% |
|             | HC vs DEP-Mix ANX           | 4       | 4  | 228                | (M: 34, F: 79)<br>113   | (M: 40, F: 75)<br>115    | 31.69       | 35.80 | 0.111                 | 0.107 | -0.098 | 0.320 | 0.297   | <0.0001  | 0.037          | 83.78% |
| <b>TAV</b>  | <b>HC vs DEP no ANX</b>     | 9       | 12 | 705                | 314                     | 391                      | 50.53       | 54.13 | 0.199                 | 0.109 | -0.014 | 0.412 | 0.067   | <0.0001  | 0.130          | 93.25% |

**Appendix 1** to Espinoza Oyarce DA, Shaw ME, Alateeq K, et al. Volumetric brain differences in clinical depression in association with anxiety: a systematic review with meta-analysis. *J Psychiatry Neurosci* 2020.  
DOI: 10.1503/jpn.190156

*Online appendices are unedited and posted as supplied by the authors.*

| Region     | Analysis             | Studies | k  | Number of subjects |                         |                         | Age (years) |       | Meta-analysis results |       |        |        |              |                   |                |               |
|------------|----------------------|---------|----|--------------------|-------------------------|-------------------------|-------------|-------|-----------------------|-------|--------|--------|--------------|-------------------|----------------|---------------|
|            |                      |         |    | Total              | HC                      | DEP                     | HC          | DEP   | MD                    | SE    | 95% CI | p      | Qp           | $\tau^2$          | I <sup>2</sup> |               |
|            | HC vs DEP-Mix no ANX | 4       | 4  | 257                | (M: 110, F: 204)<br>128 | (M: 143, F: 248)<br>129 | 48.29       | 52.03 | 0.040                 | 0.075 | -0.108 | 0.188  | 0.600        | <b>0.039</b>      | 0.015          | <b>66.18%</b> |
|            | HC vs DEP-FE no ANX  | 3       | 3  | 177                | (M: 45, F: 83)<br>91    | (M: 44, F: 85)<br>86    | 35.46       | 35.72 | -0.146                | 0.182 | -0.503 | 0.211  | 0.424        | <b>&lt;0.0001</b> | 0.087          | <b>89.00%</b> |
|            |                      |         |    |                    | (M: 43, F: 48)          | (M: 40, F: 46)          |             |       |                       |       |        |        |              |                   |                |               |
| <b>TAV</b> | HC vs DEP-Rem no ANX | 3       | 3  | 127                | (M: 18, F: 52)<br>70    | (M: 11, F: 46)<br>57    | 44.49       | 44.24 | 0.061                 | 0.157 | -0.246 | 0.369  | 0.697        | <b>0.012</b>      | 0.056          | <b>76.19%</b> |
|            | <b>HC vs DEP ANX</b> | 4       | 11 | 366                | (M: 40, F: 73)<br>113   | (M: 124, F: 129)<br>253 | 35.23       | 36.65 | -0.066                | 0.026 | -0.116 | -0.016 | <b>0.010</b> | 0.249             | 0.000          | 0.05%         |
| <b>RAV</b> | HC vs DEP no ANX     | 9       | 12 | 705                | (M: 110, F: 204)<br>314 | (M: 143, F: 248)<br>391 | 50.53       | 54.13 | 0.094                 | 0.052 | -0.009 | 0.195  | 0.072        | <b>&lt;0.0001</b> | 0.026          | <b>84.76%</b> |
| <b>RAV</b> | HC vs DEP-Mix no ANX | 4       | 4  | 257                | (M: 45, F: 83)<br>128   | (M: 44, F: 85)<br>129   | 48.29       | 52.03 | 0.022                 | 0.030 | -0.037 | 0.080  | 0.465        | 0.265             | 0.000          | 0.02%         |
|            | HC vs DEP-FE no ANX  | 3       | 3  | 177                | (M: 43, F: 48)<br>91    | (M: 40, F: 46)<br>86    | 35.46       | 35.72 | -0.074                | 0.087 | -0.244 | 0.096  | 0.396        | <b>0.017</b>      | 0.016          | <b>73.80%</b> |
|            | HC vs DEP-Rem no ANX | 3       | 3  | 127                | (M: 18, F: 52)<br>70    | (M: 11, F: 46)<br>57    | 44.49       | 44.24 | -0.003                | 0.079 | -0.158 | 0.152  | 0.971        | 0.141             | 0.009          | 48.99%        |
|            | HC vs DEP ANX        | 4       | 11 | 366                | (M: 40, F: 73)<br>113   | (M: 124, F: 129)<br>253 | 35.23       | 36.65 | -0.013                | 0.018 | -0.047 | 0.022  | 0.479        | 0.694             | 0.000          | 0.09%         |
| <b>LAV</b> | HC vs DEP no ANX     | 9       | 4  | 705                | (M: 110, F: 204)<br>314 | (M: 143, F: 248)<br>391 | 50.53       | 54.13 | 0.105                 | 0.056 | -0.004 | 0.213  | 0.059        | <b>&lt;0.0001</b> | 0.031          | <b>87.46%</b> |
|            | HC vs DEP-Mix no ANX | 4       | 4  | 257                | (M: 45, F: 83)<br>128   | (M: 44, F: 85)<br>129   | 48.29       | 52.03 | 0.028                 | 0.042 | -0.053 | 0.110  | 0.497        | 0.119             | 0.003          | 49.46%        |
|            | HC vs DEP-FE no ANX  | 3       | 3  | 177                | (M: 43, F: 48)<br>91    | (M: 40, F: 85)<br>86    | 35.46       | 35.72 | -0.064                | 0.099 | -0.257 | 0.130  | 0.521        | <b>0.001</b>      | 0.024          | <b>82.32%</b> |

**Appendix 1** to Espinoza Oyarce DA, Shaw ME, Alateeq K, et al. Volumetric brain differences in clinical depression in association with anxiety: a systematic review with meta-analysis. *J Psychiatry Neurosci* 2020. DOI: 10.1503/jpn.190156

*Online appendices are unedited and posted as supplied by the authors.*

| Region | Analysis                | Studies | k  | Number of subjects |                         |                         | Age (years) |       | Meta-analysis results |       |        |        |              |              |                |               |
|--------|-------------------------|---------|----|--------------------|-------------------------|-------------------------|-------------|-------|-----------------------|-------|--------|--------|--------------|--------------|----------------|---------------|
|        |                         |         |    | Total              | HC                      | DEP                     | HC          | DEP   | MD                    | SE    | 95% CI | p      | Qp           | $\tau^2$     | I <sup>2</sup> |               |
|        | HC vs DEP-Rem no ANX    | 3       | 3  | 127                | (M: 43, F: 48)<br>70    | (M: 40, F: 46)<br>57    | 44.49       | 44.24 | 0.050                 | 0.083 | -0.113 | 0.212  | 0.549        | 0.063        | 0.013          | <b>62.05%</b> |
|        | <b>HC vs DEP ANX</b>    | 4       | 11 | 366                | (M: 18, F: 52)<br>113   | (M: 11, F: 46)<br>253   | 35.23       | 36.65 | -0.062                | 0.019 | -0.099 | -0.025 | <b>0.001</b> | 0.605        | 0.000          | 0.00%         |
| TPuV   | <b>HC vs DEP no ANX</b> | 6       | 6  | 607                | (M: 82, F: 186)<br>268  | (M: 123, F: 216)<br>339 | 56.45       | 62.87 | 0.335                 | 0.124 | 0.092  | 0.578  | <b>0.007</b> | 0.029        | 0.053          | <b>58.96%</b> |
|        | HC vs DEP-Mix no ANX    | 4       | 4  | 435                | (M: 50, F: 130)<br>180  | (M: 91, F: 164)<br>255  | 58.57       | 65.43 | 0.148                 | 0.096 | -0.040 | 0.336  | 0.123        | 0.422        | 0.000          | 0.00%         |
|        | HC vs DEP ANX           | 4       | 11 | 836                | (M: 129, F: 212)<br>341 | (M: 215, F: 280)<br>495 | 36.53       | 39.10 | 0.100                 | 0.115 | -0.125 | 0.325  | 0.384        | <b>0.002</b> | 0.075          | <b>63.52%</b> |
| RPuV   | <b>HC vs DEP no ANX</b> | 6       | 6  | 607                | (M: 82, F: 186)<br>268  | (M: 123, F: 216)<br>339 | 56.45       | 62.87 | 0.167                 | 0.053 | 0.063  | 0.271  | <b>0.002</b> | 0.503        | 0.001          | 2.61%         |
| RPuV   | HC vs DEP-Mix no ANX    | 4       | 4  | 435                | (M: 50, F: 130)<br>180  | (M: 91, F: 164)<br>255  | 58.57       | 65.43 | 0.087                 | 0.070 | -0.049 | 0.223  | 0.211        | 0.733        | 0.000          | 0.00%         |
| LPuV   | <b>HC vs DEP no ANX</b> | 6       | 6  | 607                | (M: 82, F: 186)<br>268  | (M: 123, F: 216)<br>339 | 56.45       | 62.87 | 0.171                 | 0.076 | 0.022  | 0.321  | <b>0.025</b> | 0.120        | 0.015          | 44.32%        |
|        | HC vs DEP-Mix no ANX    | 4       | 4  | 435                | (M: 50, F: 130)<br>180  | (M: 91, F: 164)<br>255  | 58.57       | 65.43 | 0.059                 | 0.066 | -0.070 | 0.188  | 0.367        | 0.607        | 0.000          | 0.00%         |
| TCV    | HC vs DEP no ANX        | 6       | 6  | 600                | (M: 83, F: 166)<br>249  | (M: 118, F: 233)<br>351 | 55.48       | 63.51 | 0.118                 | 0.083 | -0.045 | 0.281  | 0.156        | 0.132        | 0.015          | 36.44%        |
|        | HC vs DEP-Mix no ANX    | 4       | 4  | 428                | (M: 51, F: 110)<br>161  | (M: 86, F: 181)<br>267  | 57.32       | 66.16 | 0.121                 | 0.146 | -0.166 | 0.407  | 0.409        | <b>0.049</b> | 0.052          | <b>62.73%</b> |
|        | HC vs DEP ANX           | 4       | 11 | 836                | 341                     | 495                     | 36.53       | 39.10 | -0.059                | 0.089 | -0.233 | 0.115  | 0.505        | <b>0.002</b> | 0.046          | <b>62.56%</b> |

**Appendix 1** to Espinoza Oyarce DA, Shaw ME, Alateeq K, et al. Volumetric brain differences in clinical depression in association with anxiety: a systematic review with meta-analysis. *J Psychiatry Neurosci* 2020.  
DOI: 10.1503/jpn.190156

*Online appendices are unedited and posted as supplied by the authors.*

| Region | Analysis                | Studies | k  | Number of subjects |                         |                         | Age (years) |       | Meta-analysis results |       |        |       |              |                   |                |               |
|--------|-------------------------|---------|----|--------------------|-------------------------|-------------------------|-------------|-------|-----------------------|-------|--------|-------|--------------|-------------------|----------------|---------------|
|        |                         |         |    | Total              | HC                      | DEP                     | HC          | DEP   | MD                    | SE    | 95% CI | p     | Qp           | $\tau^2$          | I <sup>2</sup> |               |
|        |                         |         |    |                    | (M: 129, F: 212)        | (M: 215, F: 280)        |             |       |                       |       |        |       |              |                   |                |               |
| RCV    | HC vs DEP no ANX        | 6       | 6  | 600                | 249<br>(M: 83, F: 166)  | 351<br>(M: 118, F: 233) | 55.48       | 63.51 | 0.044                 | 0.042 | -0.039 | 0.126 | 0.300        | 0.540             | 0.000          | 0.03%         |
|        | HC vs DEP-Mix no ANX    | 4       | 4  | 428                | 161<br>(M: 51, F: 110)  | 267<br>(M: 86, F: 181)  | 57.32       | 66.16 | 0.041                 | 0.063 | -0.083 | 0.164 | 0.519        | 0.299             | 0.002          | 14.86%        |
| LCV    | HC vs DEP no ANX        | 6       | 6  | 600                | 249<br>(M: 83, F: 166)  | 351<br>(M: 118, F: 233) | 55.48       | 63.51 | 0.078                 | 0.047 | -0.015 | 0.170 | 0.099        | 0.336             | 0.002          | 11.50%        |
|        | HC vs DEP-Mix no ANX    | 4       | 4  | 428                | 161<br>(M: 51, F: 110)  | 267<br>(M: 86, F: 181)  | 57.32       | 66.16 | 0.091                 | 0.073 | -0.052 | 0.234 | 0.212        | 0.150             | 0.009          | 41.19%        |
| TPaV   | HC vs DEP no ANX        | 4       | 4  | 306                | 161<br>(M: 60, F: 101)  | 145<br>(M: 65, F: 80)   | 50.08       | 56.85 | 0.079                 | 0.045 | -0.009 | 0.168 | 0.080        | 0.278             | 0.002          | 29.36%        |
|        | HC vs DEP ANX           | 4       | 11 | 836                | 341<br>(M: 129, F: 212) | 495<br>(M: 215, F: 280) | 37.11       | 39.10 | 0.039                 | 0.040 | -0.039 | 0.116 | 0.328        | <b>&lt;0.0001</b> | 0.013          | <b>78.85%</b> |
| RPaV   | <b>HC vs DEP no ANX</b> | 4       | 4  | 306                | 161<br>(M: 60, F: 101)  | 145<br>(M: 65, F: 80)   | 50.08       | 56.85 | 0.050                 | 0.024 | 0.003  | 0.097 | <b>0.039</b> | 0.911             | 0.000          | 0.00%         |
| LPaV   | HC vs DEP no ANX        | 4       | 4  | 306                | 161<br>(M: 60, F: 101)  | 145<br>(M: 65, F: 80)   | 50.08       | 56.85 | 0.028                 | 0.037 | -0.045 | 0.101 | 0.454        | 0.149             | 0.002          | 44.08%        |
| TTV    | <b>HC vs DEP no ANX</b> | 3       | 3  | 233                | 113<br>(M: 41, F: 72)   | 120<br>(M: 44, F: 76)   | 56.46       | 60.11 | 0.433                 | 0.140 | 0.158  | 0.708 | <b>0.002</b> | 0.629             | 0.000          | 0.00%         |
| RTV    | <b>HC vs DEP no ANX</b> | 3       | 3  | 233                | 113<br>(M: 41, F: 72)   | 120<br>(M: 44, F: 76)   | 56.46       | 60.11 | 0.220                 | 0.096 | 0.032  | 0.408 | <b>0.022</b> | 0.799             | 0.000          | 0.00%         |
| LTV    | <b>HC vs DEP no ANX</b> | 3       | 3  | 233                | 113<br>(M: 41, F: 72)   | 120<br>(M: 44, F: 76)   | 56.46       | 60.11 | 0.217                 | 0.102 | 0.016  | 0.418 | <b>0.034</b> | 0.783             | 0.000          | 0.00%         |

**Appendix 1** to Espinoza Oyarce DA, Shaw ME, Alateeq K, et al. Volumetric brain differences in clinical depression in association with anxiety: a systematic review with meta-analysis. *J Psychiatry Neurosci* 2020.  
DOI: 10.1503/jpn.190156

Online appendices are unedited and posted as supplied by the authors.

**Supplemental Table S6. Sensitivity analyses on selection of homogeneous groups**

Meta-analyses contrasting homogenous group selection in main analyses (HC vs DEP) and heterogeneous group selection (DEP SEN). k: number of samples or subsamples, n: total number of participants, HC: healthy controls, DEP: depressed participants, MD: mean difference, SE: standard error, CI: confidence interval, Qp: Q-statistic p-value,  $\tau^2$ : variance of true effects,  $I^2$ : proportion real differences between studies, zp: z-statistic p-value, TBV: total brain, ICV: intracranial, THcV: total hippocampus, RHcV: right hippocampus, LHcV: left hippocampus volumes. Bold font indicates significance at  $p \leq 0.05$  and  $I^2 > 50\%$ .

| Region | Analysis         | Studies | k  | Number of subjects |                           |                           | Age (years) |       | Meta-analysis results |       |        |        |                   |                   |          |               | Contrast to main model |       |
|--------|------------------|---------|----|--------------------|---------------------------|---------------------------|-------------|-------|-----------------------|-------|--------|--------|-------------------|-------------------|----------|---------------|------------------------|-------|
|        |                  |         |    | Total              | HC                        | DEP                       | HC          | DEP   | MD                    | SE    | 95% CI |        | p                 | Qp                | $\tau^2$ | $I^2$         | z-value                | zp    |
| TBV    | HC vs DEP        | 27      | 37 | 2618               | 1123                      | 1495                      | 50.73       | 53.19 | -1.506                | 4.127 | -9.595 | 6.583  | 0.715             | 0.279             | 0.000    | 0.00%         | -0.007                 | 0.994 |
|        | DEP SEN          | 27      | 35 | 2618               | 1123<br>(M: 391, F: 732)  | 1495<br>(M: 496, F: 999)  | 50.73       | 53.19 | -1.465                | 4.177 | -9.651 | 6.722  | 0.726             | 0.246             | 0.000    | 0.00%         |                        |       |
| ICV    | HC vs DEP        | 42      | 59 | 3775               | 1728                      | 2047                      | 48.86       | 51.07 | 5.806                 | 4.516 | -3.045 | 14.658 | 0.199             | 0.069             | 220.756  | 21.38%        | 0.259                  | 0.796 |
|        | DEP SEN          | 42      | 53 | 3775               | 1728<br>(M: 618, F: 1110) | 2047<br>(M: 691, F: 1356) | 48.86       | 51.12 | 4.117                 | 4.709 | -5.113 | 13.348 | 0.382             | 0.053             | 226.942  | 22.69%        |                        |       |
| THcV   | <b>HC vs DEP</b> | 42      | 61 | 3879               | 1737                      | 2142                      | 44.60       | 47.84 | 0.202                 | 0.040 | 0.123  | 0.281  | <b>&lt;0.0001</b> | <b>&lt;0.0001</b> | 0.072    | <b>86.58%</b> | 0.147                  | 0.883 |
|        | <b>DEP SEN</b>   | 42      | 55 | 3879               | 1737<br>(M: 651, F: 1086) | 2142<br>(M: 788, F: 1354) | 44.60       | 47.89 | 0.193                 | 0.043 | 0.110  | 0.277  | <b>&lt;0.0001</b> | <b>&lt;0.0001</b> | 0.074    | <b>87.53%</b> |                        |       |
| RHcV   | <b>HC vs DEP</b> | 34      | 50 | 3447               | 1544                      | 1903                      | 44.35       | 47.86 | 0.114                 | 0.023 | 0.069  | 0.159  | <b>&lt;0.0001</b> | <b>&lt;0.0001</b> | 0.017    | <b>76.61%</b> | 0.188                  | 0.851 |

**Appendix 1** to Espinoza Oyarce DA, Shaw ME, Alateeq K, et al. Volumetric brain differences in clinical depression in association with anxiety: a systematic review with meta-analysis. *J Psychiatry Neurosci* 2020.  
DOI: 10.1503/jpn.190156

*Online appendices are unedited and posted as supplied by the authors.*

| Region      | Analysis         | Studies | k  | Number of subjects |                          | Age (years)               |       | Meta-analysis results |       |       |        |       |         |          | Contrast to main model |         |       |       |
|-------------|------------------|---------|----|--------------------|--------------------------|---------------------------|-------|-----------------------|-------|-------|--------|-------|---------|----------|------------------------|---------|-------|-------|
|             |                  |         |    | Total              | HC                       | DEP                       | HC    | DEP                   | MD    | SE    | 95% CI | p     | Qp      | $\tau^2$ | I <sup>2</sup>         | z-value | zp    |       |
|             | <b>DEP SEN</b>   | 34      | 46 | 3447               | (M: 579, F: 965)<br>1544 | (M: 700, F: 1203)<br>1903 | 44.35 | 47.91                 | 0.108 | 0.024 | 0.060  | 0.156 | <0.0001 | <0.0001  | 0.017                  | 77.90%  |       |       |
| <b>LHcV</b> | <b>HC vs DEP</b> | 34      | 50 | 3447               | 1544<br>(M: 579, F: 965) | 1903<br>(M: 700, F: 1203) | 44.35 | 47.86                 | 0.105 | 0.023 | 0.060  | 0.150 | <0.0001 | <0.0001  | 0.017                  | 77.01%  | 0.087 | 0.930 |
|             | <b>DEP SEN</b>   | 34      | 46 | 3447               | 1544<br>(M: 579, F: 965) | 1903<br>(M: 700, F: 1203) | 44.35 | 47.91                 | 0.102 | 0.024 | 0.054  | 0.149 | <0.0001 | <0.0001  | 0.017                  | 78.15%  |       |       |



**Appendix 1** to Espinoza Oyarce DA, Shaw ME, Alateeq K, et al. Volumetric brain differences in clinical depression in association with anxiety: a systematic review with meta-analysis. *J Psychiatry Neurosci* 2020.  
DOI: 10.1503/jpn.190156

Online appendices are unedited and posted as supplied by the authors.

**Supplemental Table S7. Sensitivity analyses on selection of homogeneous groups in anxiety comorbidity assessment**

Meta-analyses contrasting homogenous group selection in main analyses (HC vs DEP) and heterogeneous group selection (DEP SEN), excluding anxiety comorbidity (no ANX) and comorbid with anxiety (ANX). k: number of samples or subsamples, n: total number of participants, HC: healthy controls, DEP: depressed participants, MD: mean difference, SE: standard error, CI: confidence interval, Qp: Q-statistic p-value,  $\tau^2$ : variance of true effects,  $I^2$ : proportion real differences between studies, zp: z-statistic p-value, TBV: total brain, ICV: intracranial, THcV: total hippocampus, RHcV: right hippocampus, LHcV: left hippocampus volumes. Bold font indicates significance at  $p \leq 0.05$  and  $I^2 > 50\%$ .

| Region | Analysis         | Studies | k  | Number of subjects |                          |                          | Age (years) |       | Meta-analysis results |        |         |        |              |              |         |         | Contrast to main model |       |
|--------|------------------|---------|----|--------------------|--------------------------|--------------------------|-------------|-------|-----------------------|--------|---------|--------|--------------|--------------|---------|---------|------------------------|-------|
|        |                  |         |    | Total              | HC                       | DEP                      | HC          | DEP   | MD                    | SE     | 95% CI  | p      | Qp           | $\tau^2$     | $I^2$   | z-value | zp                     |       |
| TBV    | HC vs DEP no ANX | 10      | 13 | 1190               | 472                      | 718                      | 56.74       | 56.78 | -7.371                | 6.963  | -21.017 | 6.276  | 0.290        | 0.483        | 0.000   | 0.00%   | 0.030                  | 0.976 |
|        | DEP no ANX SEN   | 10      | 11 | 1190               | 472<br>(M: 157, F: 315)  | 718<br>(M: 239, F: 479)  | 56.74       | 56.77 | -7.670                | 7.210  | -21.801 | 6.461  | 0.287        | 0.415        | 0.000   | 0.00%   |                        |       |
| ICV    | HC vs DEP no ANX | 23      | 30 | 2353               | 1083<br>(M: 391, F: 692) | 1270<br>(M: 421, F: 849) | 51.55       | 54.47 | 13.802                | 6.204  | 1.642   | 25.962 | <b>0.026</b> | 0.274        | 191.157 | 17.78%  | 0.198                  | 0.843 |
|        | DEP no ANX SEN   | 23      | 26 | 2353               | 1083<br>(M: 391, F: 692) | 1270<br>(M: 421, F: 849) | 51.55       | 54.54 | 12.013                | 6.548  | -0.820  | 24.846 | 0.067        | 0.297        | 184.854 | 17.88%  |                        |       |
|        | HC vs DEP ANX    | 9       | 16 | 654                | 270<br>(M: 92, F: 178)   | 384<br>(M: 157, F: 227)  | 39.47       | 38.87 | -4.747                | 9.293  | -22.961 | 13.467 | 0.610        | <b>0.040</b> | 411.763 | 38.08%  | 0.088                  | 0.930 |
|        | DEP ANX SEN      | 9       | 15 | 654                | 270                      | 384                      | 39.47       | 38.87 | -5.949                | 10.036 | -25.619 | 13.721 | 0.553        | <b>0.029</b> | 529.084 | 45.14%  |                        |       |

**Appendix 1** to Espinoza Oyarce DA, Shaw ME, Alateeq K, et al. Volumetric brain differences in clinical depression in association with anxiety: a systematic review with meta-analysis. *J Psychiatry Neurosci* 2020.  
DOI: 10.1503/jpn.190156

*Online appendices are unedited and posted as supplied by the authors.*

| Region | Analysis         | Studies | k  | Number of subjects |                         |                          | Age (years) |       | Meta-analysis results |       |        |       |         |          |                | Contrast to main model |       |       |
|--------|------------------|---------|----|--------------------|-------------------------|--------------------------|-------------|-------|-----------------------|-------|--------|-------|---------|----------|----------------|------------------------|-------|-------|
|        |                  |         |    | Total              | HC<br>(M: 92, F: 178)   | DEP<br>(M: 157, F: 227)  | HC          | DEP   | MD                    | SE    | 95% CI | p     | Qp      | $\tau^2$ | I <sup>2</sup> | z-value                | zp    |       |
| THcV   | HC vs DEP no ANX | 22      | 28 | 2121               | 952<br>(M: 360, F: 592) | 1169<br>(M: 422, F: 747) | 50.29       | 54.02 | 0.246                 | 0.058 | 0.133  | 0.360 | <0.0001 | <0.0001  | 0.073          | 83.74%                 | 0.190 | 0.850 |
|        | DEP no ANX SEN   | 22      | 23 | 2121               | 952<br>(M: 360, F: 592) | 1169<br>(M: 422, F: 747) | 50.29       | 54.10 | 0.230                 | 0.065 | 0.103  | 0.356 | 0.0004  | <0.0001  | 0.077          | 85.39%                 |       |       |
| RHcV   | HC vs DEP no ANX | 20      | 25 | 2006               | 903<br>(M: 339, F: 564) | 1103<br>(M: 387, F: 716) | 50.14       | 53.85 | 0.134                 | 0.030 | 0.075  | 0.193 | <0.0001 | <0.0001  | 0.015          | 69.53%                 | 0.195 | 0.845 |
|        | DEP no ANX SEN   | 20      | 21 | 2006               | 903<br>(M: 339, F: 564) | 1103<br>(M: 387, F: 716) | 50.14       | 53.93 | 0.125                 | 0.034 | 0.059  | 0.191 | 0.0002  | <0.0001  | 0.016          | 72.22%                 |       |       |
| LHcV   | HC vs DEP no ANX | 20      | 25 | 2006               | 903<br>(M: 339, F: 564) | 1103<br>(M: 387, F: 716) | 50.14       | 53.85 | 0.124                 | 0.029 | 0.067  | 0.180 | <0.0001 | <0.0001  | 0.013          | 67.74%                 | 0.054 | 0.957 |
|        | DEP no ANX SEN   | 20      | 21 | 2006               | 903<br>(M: 339, F: 564) | 1103<br>(M: 387, F: 716) | 50.14       | 53.93 | 0.122                 | 0.032 | 0.059  | 0.184 | 0.0001  | <0.0001  | 0.014          | 69.90%                 |       |       |

Online appendices are unedited and posted as supplied by the authors.

**Supplemental Table S8. Assessment of study influence**

Leave-one-out method results per brain region. Reported meta-analyses are shown first (underlined) to aid comparison with leave-one-out method (EXC Ref). Analyses excluding all identified studies in leave-one-out method (EXC all) are also reported. k: number of samples or subsamples, HC: healthy controls, DEP: depressed participants, MD: mean difference, SE: standard error, CI: confidence interval, Qp: Q-statistic p-value,  $\tau^2$ : variance of true effects,  $I^2$ : proportion real differences between studies, TBV: total brain, ICV: intracranial, GMV: grey matter, RHcV: right hippocampus, LHcV: left hippocampus, TAV: total amygdala, RAV: right amygdala, LAV: left amygdala volumes, Mix: heterogeneous group of depressed, FE: first episode, ME: multiple episodes, Abu: physical/sexual abuse, no ANX: analysis excluding anxiety comorbidity. Bold font indicates significance at  $p < 0.05$  and  $I^2 > 50\%$ .

| Region | Analysis                     | Studies   | k         | Leave-one-out meta-analysis results |              |               |               |              |              |                |               |
|--------|------------------------------|-----------|-----------|-------------------------------------|--------------|---------------|---------------|--------------|--------------|----------------|---------------|
|        |                              |           |           | MD                                  | SE           | 95% CI        | p             | Qp           | $\tau^2$     | $I^2$          |               |
| TBV    | <u>DEP</u>                   | <u>27</u> | <u>37</u> | <u>-1.506</u>                       | <u>4.127</u> | <u>-9.595</u> | <u>6.583</u>  | <u>0.715</u> | <u>0.279</u> | <u>0.000</u>   | <u>0.00%</u>  |
|        | EXC Andreescu (2008)         | 26        | 36        | -0.968                              | 4.582        | -9.948        | 8.013         | 0.833        | 0.242        | 42.674         | 5.76%         |
|        | EXC Devantier (2016)         | 26        | 36        | 0.328                               | 4.334        | -8.165        | 8.822         | 0.940        | 0.312        | 0.000          | 0.00%         |
|        | EXC Sawyer (2012)            | 26        | 36        | -0.511                              | 4.492        | -9.315        | 8.293         | 0.910        | 0.253        | 25.623         | 3.54%         |
|        | EXC Stratmann (2014)         | 26        | 36        | -1.211                              | 4.563        | -10.155       | 7.732         | 0.791        | 0.241        | 39.549         | 5.37%         |
|        | EXC all                      | 23        | 33        | 2.434                               | 5.853        | -9.037        | 13.905        | 0.678        | 0.219        | 172.910        | 15.75%        |
|        | <u>HC vs DEP-Mix</u>         | <u>12</u> | <u>13</u> | <u>8.375</u>                        | <u>6.116</u> | <u>-3.612</u> | <u>20.361</u> | <u>0.171</u> | <u>0.183</u> | <u>0.000</u>   | <u>0.00%</u>  |
|        | EXC Andreescu (2008)         | 11        | 12        | 12.942                              | 8.033        | -2.803        | 28.686        | 0.107        | 0.171        | 129.310        | 17.40%        |
|        | EXC Stratmann (2014)         | 11        | 12        | 12.813                              | 8.366        | -3.585        | 29.211        | 0.126        | 0.156        | 176.982        | 22.44%        |
|        | EXC all                      | 10        | 11        | 16.934                              | 9.861        | -2.394        | 36.262        | 0.086        | 0.167        | 261.362        | 25.68%        |
| ICV    | <u>HC vs DEP</u>             | <u>42</u> | <u>59</u> | <u>5.806</u>                        | <u>4.516</u> | <u>-3.045</u> | <u>14.658</u> | <u>0.199</u> | <u>0.069</u> | <u>220.756</u> | <u>21.38%</u> |
|        | EXC Meisenzahl (2010) DEP-ME | 42        | 58        | 3.693                               | 4.050        | -4.245        | 11.631        | 0.362        | 0.175        | 62.912         | 7.06%         |

**Appendix 1** to Espinoza Oyarce DA, Shaw ME, Alateeq K, et al. Volumetric brain differences in clinical depression in association with anxiety: a systematic review with meta-analysis. *J Psychiatry Neurosci* 2020.

DOI: 10.1503/jpn.190156

Online appendices are unedited and posted as supplied by the authors.

| Region  | Analysis                           | Studies          | k                | Leave-one-out meta-analysis results |                     |                      |                      |                     |                     |                       |                      |
|---------|------------------------------------|------------------|------------------|-------------------------------------|---------------------|----------------------|----------------------|---------------------|---------------------|-----------------------|----------------------|
|         |                                    |                  |                  | MD                                  | SE                  | 95% CI               | p                    | Qp                  | $\tau^2$            | I <sup>2</sup>        |                      |
|         | EXC Taylor (2007)                  | 41               | 58               | 6.658                               | 4.678               | -2.510               | 15.827               | 0.155               | 0.073               | 236.425               | 21.50%               |
|         | EXC Vythilingam (2002) DEP-Mix     | 42               | 58               | 5.395                               | 4.790               | -3.994               | 14.784               | 0.260               | 0.063               | 273.071               | 23.41%               |
| ICV     | EXC Vythilingam (2002) DEP-Abu     | 42               | 58               | 6.582                               | 4.749               | -2.727               | 15.891               | 0.166               | 0.073               | 253.428               | 21.76%               |
|         | EXC all                            | 39               | 55               | 5.087                               | 4.961               | -4.636               | 14.810               | 0.305               | 0.167               | 171.862               | 13.14%               |
|         | <b><u>DEP-Mix</u></b>              | <b><u>25</u></b> | <b><u>25</u></b> | <b><u>11.731</u></b>                | <b><u>5.838</u></b> | <b><u>0.288</u></b>  | <b><u>23.173</u></b> | <b><u>0.045</u></b> | <b><u>0.278</u></b> | <b><u>121.417</u></b> | <b><u>15.50%</u></b> |
|         | EXC Meisenzahl (2010) DEP-Mix      | 24               | 24               | 8.345                               | 5.264               | -1.972               | 18.662               | 0.113               | 0.447               | 0.000                 | 0.00%                |
|         | <b>EXC Taylor (2007)</b>           | 24               | 24               | 15.295                              | 5.403               | 4.706                | 25.884               | <b>0.005</b>        | 0.381               | 0.000                 | 0.00%                |
|         | EXC Vithilingnam (2002) DEP-Mix    | 24               | 24               | 11.480                              | 6.654               | -1.562               | 24.521               | 0.085               | 0.232               | 201.785               | 20.42%               |
|         | EXC all                            | 22               | 22               | 11.384                              | 6.696               | -1.741               | 24.509               | 0.089               | 0.464               | 0.000                 | 0.00%                |
|         | <b><u>HC vs DEP no ANX</u></b>     | <b><u>23</u></b> | <b><u>30</u></b> | <b><u>13.802</u></b>                | <b><u>6.204</u></b> | <b><u>1.642</u></b>  | <b><u>25.962</u></b> | <b><u>0.026</u></b> | <b><u>0.274</u></b> | <b><u>191.157</u></b> | <b><u>17.78%</u></b> |
|         | EXC Meisenzahl (2010) DEP-Mix      | 23               | 29               | 10.110                              | 5.800               | -1.258               | 21.478               | 0.081               | 0.511               | 45.443                | 4.69%                |
|         | <b>EXC Taylor (2007)</b>           | 22               | 29               | 17.282                              | 6.157               | 5.214                | 29.350               | <b>0.005</b>        | 0.395               | 79.675                | 7.35%                |
|         | <b>EXC all</b>                     | 21               | 28               | 13.928                              | 6.106               | 1.959                | 25.896               | <b>0.023</b>        | 0.607               | 0.000                 | 0.00%                |
|         | <b><u>HC vs DEP-Mix no ANX</u></b> | <b><u>16</u></b> | <b><u>16</u></b> | <b><u>12.765</u></b>                | <b><u>7.932</u></b> | <b><u>-2.782</u></b> | <b><u>28.312</u></b> | <b><u>0.108</u></b> | <b><u>0.192</u></b> | <b><u>230.603</u></b> | <b><u>24.89%</u></b> |
|         | EXC Meisenzahl (2010) DEP-Mix      | 15               | 15               | 7.488                               | 7.542               | -7.293               | 22.269               | 0.321               | 0.375               | 72.444                | 8.52%                |
|         | <b>EXC Taylor (2007)</b>           | 15               | 15               | 18.089                              | 7.884               | 2.637                | 33.541               | <b>0.022</b>        | 0.330               | 91.377                | 9.90%                |
| EXC all | 14                                 | 14               | 12.993           | 8.163                               | -3.006              | 28.991               | 0.111                | 0.462               | 0.000               | 0.00%                 |                      |
| GMV     | <b><u>DEP</u></b>                  | <b><u>15</u></b> | <b><u>19</u></b> | <b><u>5.541</u></b>                 | <b><u>2.437</u></b> | <b><u>0.765</u></b>  | <b><u>10.318</u></b> | <b><u>0.023</u></b> | <b><u>0.276</u></b> | <b><u>0.000</u></b>   | <b><u>0.00%</u></b>  |
|         | <b>EXC Yang (2017) DEP-FE</b>      | 15               | 18               | 5.955                               | 3.004               | 0.068                | 11.843               | <b>0.047</b>        | 0.227               | 19.229                | 12.18%               |

**Appendix 1** to Espinoza Oyarce DA, Shaw ME, Alateeq K, et al. Volumetric brain differences in clinical depression in association with anxiety: a systematic review with meta-analysis. *J Psychiatry Neurosci* 2020.

DOI: 10.1503/jpn.190156

Online appendices are unedited and posted as supplied by the authors.

| Region | Analysis                        | Studies   | k         | Leave-one-out meta-analysis results |              |               |              |                   |                   |                |               |
|--------|---------------------------------|-----------|-----------|-------------------------------------|--------------|---------------|--------------|-------------------|-------------------|----------------|---------------|
|        |                                 |           |           | MD                                  | SE           | 95% CI        | p            | Qp                | $\tau^2$          | I <sup>2</sup> |               |
| RHcV   | <u>DEP no ANX</u>               | <u>20</u> | <u>25</u> | <u>0.134</u>                        | <u>0.030</u> | <u>0.075</u>  | <u>0.193</u> | <u>&lt;0.0001</u> | <u>&lt;0.0001</u> | <u>0.015</u>   | <u>69.53%</u> |
|        | EXC Maller (2012)               | 19        | 24        | 0.118                               | 0.027        | 0.065         | 0.171        | <0.0001           | 0.0003            | 0.009          | 58.35%        |
| LHcV   | <u>DEP</u>                      | <u>34</u> | <u>50</u> | <u>0.105</u>                        | <u>0.023</u> | <u>0.060</u>  | <u>0.150</u> | <u>&lt;0.0001</u> | <u>&lt;0.0001</u> | <u>0.017</u>   | <u>77.01%</u> |
|        | EXC Vithilingnam (2002) DEP-Abu | 34        | 49        | 0.094                               | 0.021        | 0.053         | 0.135        | <0.0001           | <0.0001           | 0.012          | 69.79%        |
| LHcV   | <u>DEP no ANX</u>               | <u>20</u> | <u>25</u> | <u>0.124</u>                        | <u>0.029</u> | <u>0.067</u>  | <u>0.180</u> | <u>&lt;0.0001</u> | <u>&lt;0.0001</u> | <u>0.013</u>   | <u>67.74%</u> |
|        | EXC Maller (2012)               | 19        | 24        | 0.108                               | 0.026        | 0.058         | 0.158        | <0.0001           | 0.001             | 0.008          | 55.00%        |
| TAV    | <u>DEP</u>                      | <u>15</u> | <u>25</u> | <u>0.091</u>                        | <u>0.061</u> | <u>-0.029</u> | <u>0.211</u> | <u>0.139</u>      | <u>&lt;0.0001</u> | <u>0.081</u>   | <u>90.25%</u> |
|        | EXC Burke (2011) DEP-LO         | 15        | 24        | 0.050                               | 0.048        | -0.045        | 0.145        | 0.300             | <0.0001           | 0.044          | 83.53%        |
| RAV    | <u>DEP</u>                      | <u>13</u> | <u>23</u> | <u>0.044</u>                        | <u>0.029</u> | <u>-0.014</u> | <u>0.101</u> | <u>0.136</u>      | <u>&lt;0.0001</u> | <u>0.014</u>   | <u>77.75%</u> |
|        | EXC Burke (2011) DEP-LO         | 13        | 22        | 0.022                               | 0.020        | -0.016        | 0.061        | 0.253             | 0.004             | 0.004          | 48.50%        |
| LAV    | <u>HC vs DEP</u>                | <u>13</u> | <u>23</u> | <u>0.026</u>                        | <u>0.035</u> | <u>-0.042</u> | <u>0.095</u> | <u>0.453</u>      | <u>&lt;0.0001</u> | <u>0.022</u>   | <u>84.24%</u> |
|        | EXC Burke (2011) DEP-LO         | 13        | 22        | 0.005                               | 0.028        | -0.051        | 0.060        | 0.867             | <0.0001           | 0.012          | 74.75%        |

**Appendix 1** to Espinoza Oyarce DA, Shaw ME, Alateeq K, et al. Volumetric brain differences in clinical depression in association with anxiety: a systematic review with meta-analysis. *J Psychiatry Neurosci* 2020.  
DOI: 10.1503/jpn.190156

Online appendices are unedited and posted as supplied by the authors.

**Supplemental Table S9. Assessment of bias**

Evidence of publication bias with Egger regression test and trim-and-fill method. t: t-statistic, df: degrees of freedom, k: number of samples or subsamples, HC: healthy controls, DEP: depressed participants, MD: mean difference, SE: standard error, CI: confidence interval, Qp: Q-statistic p-value,  $\tau^2$ : variance of true effects,  $I^2$ : proportion real differences between studies, TBV: total brain, GMV: grey matter, WMV: white matter, ICV: intracranial, THcV: total hippocampus, RHcV: right hippocampus, LHcV: left hippocampus, TAV: total amygdala, RAV: right amygdala, LAV: left amygdala, TPuV: total putamen, RPuV: right putamen, LPuV: left putamen, TCV: total caudate, RCV: right caudate, LCV: left caudate, TPaV: total pallidum, RPaV: right pallidum, LPaV: left pallidum, TAcV: total accumbens volumes, Mix: heterogeneous group of depressed, EO: early-onset depression, LO: late-onset depression, FE: first episode, ME: multiple episodes, noMed: not taking antidepressants, TR: treatment-resistant depression, Rem: depression in remission, Cur: currently in depression, no ANX: analysis excluding anxiety comorbidity, ANX: analysis comorbid with anxiety. Bold font indicates significance at  $p \leq 0.05$  ( $p \leq 0.1$  for Egger test) and  $I^2 > 50\%$ .

\*Change of significance once corrected for publication bias.

| Region | Analysis      | Egger test |    |              | Trim-and-fill   |    |        |        |         |        |              |                   |          |               |
|--------|---------------|------------|----|--------------|-----------------|----|--------|--------|---------|--------|--------------|-------------------|----------|---------------|
|        |               | t          | df | p            | Missing studies | k  | MD     | SE     | 95% CI  |        | p            | Qp                | $\tau^2$ | $I^2$         |
| TBV    | HC vs DEP     | 0.764      | 35 | 0.450        | 7               | 44 | -8.563 | 5.306  | -18.962 | 1.836  | 0.107        | <b>0.012</b>      | 393.460  | 36.47%        |
|        | HC vs DEP-Mix | 1.179      | 11 | 0.263        | 2               | 15 | 6.394  | 7.302  | -7.917  | 20.705 | 0.381        | 0.091             | 162.326  | 22.18%        |
|        | HC vs DEP-LO* | -2.037     | 5  | <b>0.097</b> | 3               | 10 | 39.086 | 14.962 | 9.762   | 68.411 | <b>0.009</b> | <b>&lt;0.0001</b> | 1701.546 | <b>86.96%</b> |

**Appendix 1** to Espinoza Oyarce DA, Shaw ME, Alateeq K, et al. Volumetric brain differences in clinical depression in association with anxiety: a systematic review with meta-analysis. *J Psychiatry Neurosci* 2020.  
DOI: 10.1503/jpn.190156

Online appendices are unedited and posted as supplied by the authors.

| Region     | Analysis             | Egger test |    |              | Trim-and-fill   |    |         |        |         |        |              |              |                |               |
|------------|----------------------|------------|----|--------------|-----------------|----|---------|--------|---------|--------|--------------|--------------|----------------|---------------|
|            |                      | t          | df | p            | Missing studies | k  | MD      | SE     | 95% CI  | p      | Qp           | $\tau^2$     | I <sup>2</sup> |               |
|            | HC vs DEP no ANX*    | 0.281      | 11 | 0.784        | 4<br>left side  | 17 | -15.170 | 6.622  | -28.149 | -2.191 | <b>0.022</b> | 0.279        | 42.399         | 5.65%         |
|            | HC vs DEP-Mix no ANX | -3.553     | 2  | <b>0.071</b> | 1<br>right side | 5  | 4.502   | 10.078 | -15.252 | 24.255 | 0.655        | 0.832        | 0.000          | 0.00%         |
|            | HC vs DEP-EO no ANX  | 0.526      | 1  | 0.692        | 2<br>left side  | 5  | -5.200  | 12.970 | -30.621 | 20.221 | 0.689        | 0.470        | 0.000          | 0.00%         |
| <b>GMV</b> | DEP-TR               | -0.333     | 1  | 0.795        | 1<br>right side | 4  | 16.127  | 9.181  | -1.866  | 34.121 | 0.079        | 0.056        | 205.714        | <b>63.64%</b> |
| <b>WMV</b> | HC vs DEP-Mix        | 17.716     | 1  | <b>0.036</b> | 2<br>left side  | 5  | -4.080  | 4.723  | -13.337 | 5.177  | 0.388        | 0.665        | 0.000          | 0.00%         |
|            | HC vs DEP-FE         | 14.989     | 1  | <b>0.042</b> | 2<br>left side  | 5  | -5.660  | 10.749 | -26.728 | 15.408 | 0.599        | 0.054        | 331.782        | <b>59.09%</b> |
|            | HC vs DEP no ANX     | 0.194      | 6  | 0.853        | 1<br>left side  | 9  | 2.391   | 4.043  | -5.533  | 10.315 | 0.554        | 0.355        | 0.000          | 0.00%         |
| <b>ICV</b> | HC vs DEP            | -0.032     | 57 | 0.975        | 3<br>right side | 62 | 7.879   | 4.654  | -1.242  | 16.999 | 0.091        | <b>0.019</b> | 290.557        | 25.67%        |
|            | HC vs DEP-Mix        | -0.519     | 23 | 0.609        | 4<br>right side | 29 | 17.426  | 6.151  | 5.369   | 29.482 | <b>0.005</b> | 0.073        | 245.109        | 25.51%        |
|            | HC vs DEP-LO         | 3.496      | 1  | 0.177        | 2<br>left side  | 5  | -6.600  | 15.464 | -36.909 | 23.709 | 0.670        | 0.311        | 53.750         | 4.45%         |
|            | HC vs DEP-FE         | -1.288     | 2  | 0.327        | 1<br>right side | 5  | 16.984  | 16.571 | -15.496 | 49.463 | 0.305        | 0.212        | 293.425        | 20.65%        |
|            | HC vs DEP-ME         | -0.279     | 2  | 0.806        | 1<br>right side | 5  | 30.373  | 19.002 | -6.870  | 67.615 | 0.110        | 0.058        | 925.159        | <b>54.04%</b> |

**Appendix 1** to Espinoza Oyarce DA, Shaw ME, Alateeq K, et al. Volumetric brain differences in clinical depression in association with anxiety: a systematic review with meta-analysis. *J Psychiatry Neurosci* 2020. DOI: 10.1503/jpn.190156

Online appendices are unedited and posted as supplied by the authors.

| Region      | Analysis              | Egger test |    |              | Trim-and-fill   |    |         |        |         |        |                   |                   |                |               |
|-------------|-----------------------|------------|----|--------------|-----------------|----|---------|--------|---------|--------|-------------------|-------------------|----------------|---------------|
|             |                       | t          | df | p            | Missing studies | k  | MD      | SE     | 95% CI  | p      | Qp                | $\tau^2$          | I <sup>2</sup> |               |
|             | HC vs DEP-noMed       | -2.153     | 4  | <b>0.098</b> | 2               | 8  | -10.196 | 15.157 | -39.904 | 19.511 | 0.501             | 0.618             | 0.000          | 0.00%         |
|             |                       |            |    |              | right side      |    |         |        |         |        |                   |                   |                |               |
|             | HC vs DEP-Rem         | 1.403      | 3  | 0.255        | 2               | 7  | -28.269 | 15.197 | -58.054 | 1.515  | 0.063             | 0.117             | 375.580        | 23.61%        |
|             |                       |            |    |              | left side       |    |         |        |         |        |                   |                   |                |               |
|             | DEP no ANX            | -0.658     | 28 | 0.516        | 4               | 34 | 18.398  | 6.212  | 6.223   | 30.573 | <b>0.003</b>      | 0.112             | 251.639        | 20.95%        |
|             |                       |            |    |              | right side      |    |         |        |         |        |                   |                   |                |               |
|             | HC vs DEP-Mix no ANX* | -0.397     | 14 | 0.697        | 3               | 19 | 19.117  | 8.018  | 3.403   | 34.831 | <b>0.017</b>      | 0.071             | 331.321        | 30.24%        |
|             |                       |            |    |              | right side      |    |         |        |         |        |                   |                   |                |               |
| <b>THcV</b> | HC vs DEP             | 0.685      | 59 | 0.496        | 2               | 63 | 0.219   | 0.041  | 0.139   | 0.299  | <b>&lt;0.0001</b> | <b>&lt;0.0001</b> | 0.078          | <b>87.23%</b> |
|             |                       |            |    |              | right side      |    |         |        |         |        |                   |                   |                |               |
|             | HC vs DEP-Mix         | 1.781      | 24 | <b>0.088</b> | 4               | 30 | 0.195   | 0.065  | 0.068   | 0.323  | <b>0.003</b>      | <b>&lt;0.0001</b> | 0.102          | <b>86.87%</b> |
|             |                       |            |    |              | left side       |    |         |        |         |        |                   |                   |                |               |
|             | HC vs DEP-LO          | 2.147      | 5  | <b>0.085</b> | 1               | 8  | 0.313   | 0.101  | 0.114   | 0.511  | <b>0.002</b>      | <b>&lt;0.0001</b> | 0.053          | <b>77.16%</b> |
|             |                       |            |    |              | left side       |    |         |        |         |        |                   |                   |                |               |
|             | HC vs DEP-noMed       | -0.612     | 1  | 0.651        | 1               | 4  | 0.195   | 0.152  | -0.104  | 0.493  | 0.201             | 0.085             | 0.046          | <b>52.86%</b> |
|             |                       |            |    |              | right side      |    |         |        |         |        |                   |                   |                |               |
|             | HC vs DEP-Cur         | -0.184     | 5  | 0.861        | 1               | 8  | 0.153   | 0.085  | -0.014  | 0.320  | 0.073             | <b>0.002</b>      | 0.038          | <b>72.66%</b> |
|             |                       |            |    |              | right side      |    |         |        |         |        |                   |                   |                |               |
|             | HC vs DEP-Mix no ANX  | 0.696      | 15 | 0.497        | 3               | 20 | 0.180   | 0.084  | 0.015   | 0.345  | <b>0.033</b>      | <b>&lt;0.0001</b> | 0.118          | <b>88.53%</b> |
|             |                       |            |    |              | left side       |    |         |        |         |        |                   |                   |                |               |
|             | HC vs DEP-EO no ANX*  | -9.174     | 1  | <b>0.069</b> | 2               | 5  | 0.270   | 0.126  | 0.023   | 0.517  | <b>0.032</b>      | <b>0.002</b>      | 0.063          | <b>81.21%</b> |
|             |                       |            |    |              | right side      |    |         |        |         |        |                   |                   |                |               |
|             | HC vs DEP-Rem no ANX  | 1.293      | 2  | 0.325        | 2               | 6  | -0.061  | 0.062  | -0.182  | 0.060  | 0.325             | 0.540             | 0.000          | 0.00%         |
|             |                       |            |    |              | left side       |    |         |        |         |        |                   |                   |                |               |



**Appendix 1** to Espinoza Oyarce DA, Shaw ME, Alateeq K, et al. Volumetric brain differences in clinical depression in association with anxiety: a systematic review with meta-analysis. *J Psychiatry Neurosci* 2020. DOI: 10.1503/jpn.190156

Online appendices are unedited and posted as supplied by the authors.

| Region      | Analysis             | Egger test |    |              | Trim-and-fill   |    |       |       |        |       |                   |                   |                |               |
|-------------|----------------------|------------|----|--------------|-----------------|----|-------|-------|--------|-------|-------------------|-------------------|----------------|---------------|
|             |                      | t          | df | p            | Missing studies | k  | MD    | SE    | 95% CI | p     | Qp                | $\tau^2$          | I <sup>2</sup> |               |
|             | HC vs DEP ANX*       | -0.101     | 19 | 0.921        | 3               | 24 | 0.170 | 0.080 | 0.013  | 0.326 | <b>0.033</b>      | <b>&lt;0.0001</b> | 0.116          | <b>90.39%</b> |
|             | HC vs DEP-Mix ANX    | 2.898      | 2  | 0.101        | 1               | 5  | 0.157 | 0.221 | -0.277 | 0.591 | 0.478             | <b>&lt;0.0001</b> | 0.223          | <b>93.21%</b> |
| <b>RHcV</b> | HC vs DEP            | 1.025      | 48 | 0.310        | 2               | 52 | 0.123 | 0.023 | 0.077  | 0.169 | <b>&lt;0.0001</b> | <b>&lt;0.0001</b> | 0.018          | <b>77.37%</b> |
|             | HC vs DEP-Mix        | 2.151      | 19 | <b>0.045</b> | 4               | 25 | 0.099 | 0.034 | 0.032  | 0.165 | <b>0.004</b>      | <b>&lt;0.0001</b> | 0.021          | <b>75.51%</b> |
|             | HC vs DEP-LO         | 1.159      | 4  | 0.311        | 1               | 7  | 0.189 | 0.060 | 0.073  | 0.306 | <b>0.002</b>      | <b>0.045</b>      | 0.011          | <b>50.43%</b> |
| <b>RHcV</b> | HC vs DEP-Cur*       | -0.945     | 3  | 0.414        | 3               | 8  | 0.133 | 0.057 | 0.021  | 0.245 | <b>0.020</b>      | <b>0.001</b>      | 0.017          | <b>75.97%</b> |
|             | HC vs DEP-Mix no ANX | 0.835      | 13 | 0.419        | 2               | 17 | 0.101 | 0.039 | 0.025  | 0.178 | <b>0.009</b>      | <b>&lt;0.0001</b> | 0.018          | <b>73.22%</b> |
|             | HC vs DEP-EO no ANX* | -1.069     | 1  | 0.479        | 2               | 5  | 0.160 | 0.058 | 0.046  | 0.275 | <b>0.006</b>      | <b>0.027</b>      | 0.011          | <b>64.56%</b> |
|             | HC vs DEP ANX        | 0.097      | 18 | 0.924        | 2               | 22 | 0.080 | 0.043 | -0.004 | 0.163 | 0.063             | <b>&lt;0.0001</b> | 0.026          | <b>82.08%</b> |
|             | HC vs DEP-Mix ANX    | 3.627      | 2  | <b>0.068</b> | 0               | NA | NA    | NA    | NA     | NA    | NA                | NA                | NA             | NA            |
| <b>LHcV</b> | HC vs DEP            | 0.606      | 48 | 0.547        | 5               | 55 | 0.127 | 0.023 | 0.081  | 0.173 | <b>&lt;0.0001</b> | <b>&lt;0.0001</b> | 0.020          | <b>79.39%</b> |
|             | HC vs DEP-Mix        | 2.795      | 19 | <b>0.012</b> | 5               | 26 | 0.085 | 0.035 | 0.017  | 0.153 | <b>0.014</b>      | <b>&lt;0.0001</b> | 0.022          | <b>76.34%</b> |

**Appendix 1** to Espinoza Oyarce DA, Shaw ME, Alateeq K, et al. Volumetric brain differences in clinical depression in association with anxiety: a systematic review with meta-analysis. *J Psychiatry Neurosci* 2020.  
DOI: 10.1503/jpn.190156

Online appendices are unedited and posted as supplied by the authors.

| Region | Analysis             | Egger test |    |              | Trim-and-fill   |            |        |       |        |       |              |              |                |               |
|--------|----------------------|------------|----|--------------|-----------------|------------|--------|-------|--------|-------|--------------|--------------|----------------|---------------|
|        |                      | t          | df | p            | Missing studies | k          | MD     | SE    | 95% CI | p     | Qp           | $\tau^2$     | I <sup>2</sup> |               |
|        | HC vs DEP-LO         | 1.070      | 4  | 0.345        | 2               | 8          | 0.141  | 0.047 | 0.049  | 0.233 | <b>0.003</b> | 0.102        | 0.006          | 39.19%        |
|        |                      |            |    |              | left side       |            |        |       |        |       |              |              |                |               |
|        | HC vs DEP-Rem        | -0.558     | 6  | 0.597        | 1               | 9          | 0.005  | 0.033 | -0.060 | 0.070 | 0.882        | 0.759        | 0.000          | 0.00%         |
|        |                      |            |    |              |                 |            |        |       |        |       |              |              |                |               |
|        |                      |            |    |              |                 | right side |        |       |        |       |              |              |                |               |
|        |                      |            |    |              |                 |            |        |       |        |       |              |              |                |               |
|        | HC vs DEP-EO no ANX  | -3.498     | 1  | 0.177        | 2               | 5          | 0.110  | 0.062 | -0.011 | 0.231 | 0.075        | <b>0.020</b> | 0.013          | <b>69.97%</b> |
|        |                      |            |    |              | right side      |            |        |       |        |       |              |              |                |               |
|        | HC vs DEP-LO no ANX  | 0.595      | 3  | 0.594        | 1               | 6          | 0.141  | 0.048 | 0.047  | 0.235 | <b>0.003</b> | 0.102        | 0.006          | 45.86%        |
|        |                      |            |    |              |                 |            |        |       |        |       |              |              |                |               |
|        |                      |            |    |              |                 | left side  |        |       |        |       |              |              |                |               |
|        |                      |            |    |              |                 |            |        |       |        |       |              |              |                |               |
|        | HC vs DEP-Rem no ANX | 3.409      | 2  | <b>0.076</b> | 2               | 6          | -0.045 | 0.037 | -0.117 | 0.028 | 0.226        | 0.294        | 0.000          | 0.04%         |
|        |                      |            |    |              |                 |            |        |       |        |       |              |              |                |               |
|        |                      |            |    |              |                 | left side  |        |       |        |       |              |              |                |               |
|        |                      |            |    |              |                 |            |        |       |        |       |              |              |                |               |
|        |                      |            |    |              |                 | right side |        |       |        |       |              |              |                |               |
|        |                      |            |    |              |                 |            |        |       |        |       |              |              |                |               |
| TAV    | HC vs DEP-Rem        | 1.720      | 5  | 0.146        | 1               | 8          | -0.059 | 0.060 | -0.176 | 0.059 | 0.326        | <b>0.019</b> | 0.017          | <b>62.68%</b> |
|        |                      |            |    |              | left side       |            |        |       |        |       |              |              |                |               |
|        | HC vs DEP-Cur        | 0.147      | 2  | 0.896        | 1               | 5          | -0.001 | 0.082 | -0.163 | 0.160 | 0.989        | 0.146        | 0.014          | 43.05%        |
|        |                      |            |    |              |                 |            |        |       |        |       |              |              |                |               |
|        |                      |            |    |              | right side      |            |        |       |        |       |              |              |                |               |
| RAV    | HC vs DEP-Mix        | -0.971     | 3  | 0.403        | 1               | 6          | 0.022  | 0.038 | -0.053 | 0.096 | 0.574        | 0.081        | 0.004          | 49.62%        |
|        |                      |            |    |              | right side      |            |        |       |        |       |              |              |                |               |
|        | HC vs DEP-FE         | -2.294     | 1  | 0.262        | 2               | 5          | -0.020 | 0.035 | -0.088 | 0.048 | 0.563        | 0.919        | 0.000          | 0.00%         |
|        |                      |            |    |              |                 |            |        |       |        |       |              |              |                |               |
|        |                      |            |    |              | right side      |            |        |       |        |       |              |              |                |               |
|        | HC vs DEP-Rem        | 0.445      | 5  | 0.675        | 2               | 9          | -0.028 | 0.023 | -0.073 | 0.018 | 0.233        | 0.542        | 0.000          | 0.08%         |
|        |                      |            |    |              |                 |            |        |       |        |       |              |              |                |               |
|        |                      |            |    |              | left side       |            |        |       |        |       |              |              |                |               |

**Appendix 1** to Espinoza Oyarce DA, Shaw ME, Alateeq K, et al. Volumetric brain differences in clinical depression in association with anxiety: a systematic review with meta-analysis. *J Psychiatry Neurosci* 2020.  
DOI: 10.1503/jpn.190156

Online appendices are unedited and posted as supplied by the authors.

| Region | Analysis             | Egger test |    |              | Trim-and-fill   |    |        |       |        |       |                   |                   |                |               |
|--------|----------------------|------------|----|--------------|-----------------|----|--------|-------|--------|-------|-------------------|-------------------|----------------|---------------|
|        |                      | t          | df | p            | Missing studies | k  | MD     | SE    | 95% CI | p     | Qp                | $\tau^2$          | I <sup>2</sup> |               |
|        | HC vs DEP-Cur        | -2.137     | 1  | 0.279        | 2               | 5  | -0.020 | 0.035 | -0.088 | 0.048 | 0.563             | 0.919             | 0.000          | 0.00%         |
|        |                      |            |    |              | right side      |    |        |       |        |       |                   |                   |                |               |
|        | HC vs DEP no ANX*    | 0.308      | 10 | 0.765        | 3               | 15 | 0.153  | 0.054 | 0.046  | 0.259 | <b>0.005</b>      | <b>&lt;0.0001</b> | 0.037          | <b>87.81%</b> |
|        |                      |            |    |              | right side      |    |        |       |        |       |                   |                   |                |               |
| LAV    | HC vs DEP-Rem        | 3.261      | 5  | <b>0.022</b> | 2               | 9  | -0.058 | 0.040 | -0.136 | 0.021 | 0.151             | <b>0.016</b>      | 0.008          | <b>60.82%</b> |
|        |                      |            |    |              | left side       |    |        |       |        |       |                   |                   |                |               |
|        | HC vs DEP-Cur        | -5.962     | 1  | 0.106        | 2               | 5  | -0.050 | 0.034 | -0.116 | 0.016 | 0.138             | 0.958             | 0.000          | 0.00%         |
|        |                      |            |    |              | right side      |    |        |       |        |       |                   |                   |                |               |
| TPuV   | HC vs DEP            | 0.927      | 18 | 0.366        | 1               | 21 | 0.196  | 0.076 | 0.047  | 0.345 | <b>0.010</b>      | <b>&lt;0.0001</b> | 0.062          | <b>60.02%</b> |
|        |                      |            |    |              | left side       |    |        |       |        |       |                   |                   |                |               |
|        | HC vs DEP-Mix no ANX | 0.315      | 2  | 0.783        | 1               | 5  | 0.079  | 0.108 | -0.132 | 0.291 | 0.462             | 0.223             | 0.016          | 28.06%        |
|        |                      |            |    |              | left side       |    |        |       |        |       |                   |                   |                |               |
| RPuV   | HC vs DEP no ANX     | -0.636     | 4  | 0.560        | 2               | 8  | 0.234  | 0.059 | 0.118  | 0.350 | <b>&lt;0.0001</b> | 0.118             | 0.010          | 38.41%        |
|        |                      |            |    |              | right side      |    |        |       |        |       |                   |                   |                |               |
| RPuV   | HC vs DEP-Mix no ANX | -0.042     | 2  | 0.970        | 1               | 5  | 0.105  | 0.065 | -0.022 | 0.232 | 0.106             | 0.768             | 0.000          | 0.00%         |
|        |                      |            |    |              | right side      |    |        |       |        |       |                   |                   |                |               |
| LPuV   | HC vs DEP-Mix        | 0.793      | 3  | 0.486        | 2               | 7  | 0.038  | 0.053 | -0.066 | 0.143 | 0.472             | 0.713             | 0.000          | 0.00%         |
|        |                      |            |    |              | left side       |    |        |       |        |       |                   |                   |                |               |
|        | HC vs DEP no ANX*    | 0.687      | 4  | 0.530        | 1               | 7  | 0.127  | 0.077 | -0.024 | 0.279 | 0.100             | <b>0.048</b>      | 0.022          | <b>54.17%</b> |
|        |                      |            |    |              | left side       |    |        |       |        |       |                   |                   |                |               |
|        | HC vs DEP-Mix no ANX | 0.641      | 2  | 0.587        | 2               | 6  | 0.010  | 0.058 | -0.104 | 0.124 | 0.858             | 0.496             | 0.000          | 0.00%         |
|        |                      |            |    |              | left side       |    |        |       |        |       |                   |                   |                |               |
| TCV    | HC vs DEP-Mix*       | -0.911     | 6  | 0.398        | 2               | 10 | 0.207  | 0.094 | 0.023  | 0.391 | <b>0.028</b>      | 0.088             | 0.033          | 42.16%        |
|        |                      |            |    |              | right side      |    |        |       |        |       |                   |                   |                |               |

**Appendix 1** to Espinoza Oyarce DA, Shaw ME, Alateeq K, et al. Volumetric brain differences in clinical depression in association with anxiety: a systematic review with meta-analysis. *J Psychiatry Neurosci* 2020.  
DOI: 10.1503/jpn.190156

Online appendices are unedited and posted as supplied by the authors.

| Region | Analysis             | Egger test |    |              | Trim-and-fill   |    |       |       |        |       |              |                   |                |               |
|--------|----------------------|------------|----|--------------|-----------------|----|-------|-------|--------|-------|--------------|-------------------|----------------|---------------|
|        |                      | t          | df | p            | Missing studies | k  | MD    | SE    | 95% CI | p     | Qp           | $\tau^2$          | I <sup>2</sup> |               |
|        | HC vs DEP no ANX     | -1.487     | 4  | 0.211        | 1<br>right side | 7  | 0.160 | 0.090 | -0.017 | 0.336 | 0.076        | 0.056             | 0.026          | 47.68%        |
| RCV    | HC vs DEP            | -1.578     | 13 | 0.139        | 3<br>right side | 18 | 0.051 | 0.038 | -0.023 | 0.126 | 0.174        | <b>0.014</b>      | 0.010          | 44.80%        |
|        | HC vs DEP no ANX     | -0.630     | 4  | 0.563        | 1<br>right side | 7  | 0.057 | 0.041 | -0.023 | 0.137 | 0.163        | 0.436             | 0.000          | 0.00%         |
|        | HC vs DEP-Mix no ANX | -0.375     | 2  | 0.744        | 1<br>right side | 5  | 0.071 | 0.064 | -0.055 | 0.197 | 0.266        | 0.213             | 0.005          | 23.97%        |
| LCV    | HC vs DEP            | -2.201     | 13 | <b>0.046</b> | 4<br>right side | 19 | 0.057 | 0.035 | -0.011 | 0.125 | 0.099        | <b>0.016</b>      | 0.008          | 40.67%        |
|        | HC vs DEP no ANX*    | -1.043     | 4  | 0.356        | 1<br>right side | 7  | 0.093 | 0.047 | 0.002  | 0.184 | <b>0.046</b> | 0.275             | 0.002          | 12.94%        |
|        | HC vs DEP-Mix no ANX | -0.730     | 2  | 0.542        | 1<br>right side | 5  | 0.126 | 0.073 | -0.018 | 0.269 | 0.086        | 0.101             | 0.011          | 44.17%        |
| TPaV   | HC vs DEP            | 0.662      | 14 | 0.519        | 2<br>left side  | 18 | 0.029 | 0.031 | -0.031 | 0.089 | 0.344        | <b>&lt;0.0001</b> | 0.012          | <b>74.72%</b> |
| TPaV   | HC vs DEP-Mix        | 0.917      | 3  | 0.427        | 1<br>left side  | 6  | 0.035 | 0.036 | -0.035 | 0.105 | 0.330        | 0.215             | 0.002          | 33.04%        |
|        | HC vs DEP no ANX     | 0.099      | 2  | 0.930        | 1<br>left side  | 5  | 0.070 | 0.042 | -0.011 | 0.152 | 0.092        | 0.357             | 0.002          | 22.26%        |
| RPaV   | HC vs DEP            | 0.376      | 11 | 0.714        | 1<br>left side  | 14 | 0.022 | 0.020 | -0.018 | 0.062 | 0.279        | <b>0.0004</b>     | 0.003          | <b>65.28%</b> |
|        | HC vs DEP-Mix*       | -3.594     | 1  | 0.173        | 2<br>right side | 5  | 0.060 | 0.028 | 0.006  | 0.115 | <b>0.031</b> | 0.997             | 0.000          | 0.00%         |

**Appendix 1** to Espinoza Oyarce DA, Shaw ME, Alateeq K, et al. Volumetric brain differences in clinical depression in association with anxiety: a systematic review with meta-analysis. *J Psychiatry Neurosci* 2020.  
DOI: 10.1503/jpn.190156

*Online appendices are unedited and posted as supplied by the authors.*

| Region | Analysis         | Egger test |    |       | Trim-and-fill   |    |        |       |        |       |              |                   |                |               |
|--------|------------------|------------|----|-------|-----------------|----|--------|-------|--------|-------|--------------|-------------------|----------------|---------------|
|        |                  | t          | df | p     | Missing studies | k  | MD     | SE    | 95% CI | p     | Qp           | $\tau^2$          | I <sup>2</sup> |               |
|        | HC vs DEP no ANX | -0.269     | 2  | 0.813 | 2<br>right side | 6  | 0.064  | 0.020 | 0.025  | 0.104 | <b>0.002</b> | 0.892             | 0.000          | 0.00%         |
| LPaV   | HC vs DEP        | 0.525      | 11 | 0.610 | 2<br>left side  | 15 | 0.019  | 0.015 | -0.009 | 0.048 | 0.185        | 0.129             | 0.001          | 18.86%        |
|        | HC vs DEP-Mix    | 0.763      | 1  | 0.585 | 1<br>left side  | 4  | 0.002  | 0.036 | -0.068 | 0.072 | 0.958        | 0.211             | 0.001          | 23.40%        |
|        | HC vs DEP no ANX | 0.472      | 2  | 0.683 | 1<br>left side  | 5  | 0.015  | 0.035 | -0.053 | 0.084 | 0.659        | 0.155             | 0.002          | 39.03%        |
| RTV    | HC vs DEP no ANX | 0.491      | 1  | 0.710 | 1<br>left side  | 4  | 0.191  | 0.086 | 0.022  | 0.359 | <b>0.027</b> | 0.821             | 0.000          | 0.00%         |
| TAcV   | HC vs DEP        | 0.747      | 7  | 0.480 | 2<br>left side  | 11 | -0.037 | 0.025 | -0.086 | 0.013 | 0.149        | <b>&lt;0.0001</b> | 0.005          | <b>72.45%</b> |

**Appendix 1** to Espinoza Oyarce DA, Shaw ME, Alateeq K, et al. Volumetric brain differences in clinical depression in association with anxiety: a systematic review with meta-analysis. *J Psychiatry Neurosci* 2020. DOI: 10.1503/jpn.190156

Online appendices are unedited and posted as supplied by the authors.

**Supplemental Table S10. Meta-regression results**

k: number of samples or subsamples, mod: moderator, HC: healthy controls, DEP: depressed participants, %F: percent female, diff: difference, %Med: percent medicated, mod: moderator, Seg: segmentation, Man/Auto: manual/automated segmentation, HDS-17: 17-item Hamilton Depression Score, MD: mean difference, SE: standard error, CI: confidence interval, QEp: test for residual heterogeneity p-value, QMp: test of moderators p-value,  $\tau^2$ : variance of true effects,  $I^2$ : residual heterogeneity unaccounted by model,  $R^2$ : heterogeneity accounted by model, TBV: total brain, THcV: total hippocampus, RHcV: right hippocampus, LHcV: left hippocampus, ICV: intracranial volumes. Model A: combined demographics of HC and DEP, Model B: combined age and %F diff of HC and DEP. Bold font indicates significance at  $p \leq 0.05$  and  $I^2/R^2 > 50\%$ .

| Region | Analysis | Moderator | k   | Mixed-Effects Model |         |           |         |        |         |        |          |       |       |               |       |       |
|--------|----------|-----------|-----|---------------------|---------|-----------|---------|--------|---------|--------|----------|-------|-------|---------------|-------|-------|
|        |          |           |     |                     | MD      | SE        | 95% CI  | p      | QEp     | QMp    | $\tau^2$ | $I^2$ | $R^2$ |               |       |       |
| TBV    | Gender   | Total %F  | 37  | intercept           | -9.435  | 18.568    | -45.827 | 26.958 | 0.611   | 0.248  | 0.661    | 0.000 | 0.00% | 0.00%         |       |       |
|        |          |           |     | mod                 | 0.120   | 0.273     | -0.416  | 0.655  | 0.661   |        |          |       |       |               |       |       |
|        |          | HC %F     | 37  | intercept           | -6.403  | 17.802    | -41.293 | 28.487 | 0.719   | 0.244  | 0.777    | 0.000 | 0.00% | <b>74.27%</b> |       |       |
|        |          |           |     | mod                 | 0.076   | 0.269     | -0.451  | 0.603  | 0.777   |        |          |       |       |               |       |       |
|        |          | DEP %F    | 37  | intercept           | -11.083 | 17.258    | -44.908 | 22.743 | 0.521   | 0.252  | 0.568    | 0.000 | 0.00% | 0.00%         |       |       |
|        |          |           |     | mod                 | 0.141   | 0.247     | -0.342  | 0.624  | 0.568   |        |          |       |       |               |       |       |
|        |          | HC/DEP %F | 37  | intercept           | -8.833  | 18.216    | -44.536 | 26.870 | 0.628   | 0.221  | 0.788    | 0.000 | 0.00% | 16.08%        |       |       |
|        |          |           |     | HC %F               | -0.197  | 0.511     | -1.199  | 0.805  | 0.700   |        |          |       |       |               |       |       |
|        |          |           |     | DEP %F              | 0.295   | 0.469     | -0.624  | 1.213  | 0.529   |        |          |       |       |               |       |       |
|        |          | %F diff   | 37  | intercept           | -2.487  | 4.451     | -11.210 | 6.236  | 0.576   | 0.253  | 0.556    | 0.000 | 0.00% | 14.28%        |       |       |
|        |          |           |     | mod                 | -0.274  | 0.465     | -1.185  | 0.638  | 0.556   |        |          |       |       |               |       |       |
|        |          |           | Age | Total Age           | 37      | intercept | -4.010  | 7.782  | -19.262 | 11.242 | 0.606    | 0.246 | 0.693 | 8.992         | 1.34% | 0.00% |

**Appendix 1** to Espinoza Oyarce DA, Shaw ME, Alateeq K, et al. Volumetric brain differences in clinical depression in association with anxiety: a systematic review with meta-analysis. *J Psychiatry Neurosci* 2020.  
DOI: 10.1503/jpn.190156

Online appendices are unedited and posted as supplied by the authors.

| Region | Analysis | Moderator  | k  | Mixed-Effects Model |        |        |         |        |                   |                   |                |                |               |       |
|--------|----------|------------|----|---------------------|--------|--------|---------|--------|-------------------|-------------------|----------------|----------------|---------------|-------|
|        |          |            |    | MD                  | SE     | 95% CI | p       | QEp    | QMp               | $\tau^2$          | I <sup>2</sup> | R <sup>2</sup> |               |       |
|        |          | HC Age     | 37 | mod                 | 0.102  | 0.258  | -0.403  | 0.606  | 0.693             |                   |                |                |               |       |
|        |          |            |    | intercept           | -4.153 | 7.596  | -19.041 | 10.735 | 0.585             | 0.247             | 0.664          | 10.566         | 1.57%         | 0.00% |
|        |          |            |    | mod                 | 0.111  | 0.255  | -0.388  | 0.609  | 0.664             |                   |                |                |               |       |
|        |          | DEP Age    | 37 | intercept           | -3.982 | 7.936  | -19.537 | 11.573 | 0.616             | 0.246             | 0.705          | 7.586          | 1.14%         | 0.00% |
|        |          |            |    | mod                 | 0.098  | 0.259  | -0.410  | 0.606  | 0.705             |                   |                |                |               |       |
| TBV    | Age      | HC/DEP Age | 37 | intercept           | -2.853 | 8.600  | -19.708 | 14.001 | 0.740             | 0.215             | 0.847          | 45.043         | 6.34%         | 0.00% |
|        |          |            |    | HC age              | 0.733  | 1.764  | -2.724  | 4.191  | 0.678             |                   |                |                |               |       |
|        |          |            |    | DEP age             | -0.633 | 1.802  | -4.166  | 2.900  | 0.726             |                   |                |                |               |       |
|        | Model    | Model A    | 37 | intercept           | -9.872 | 19.252 | -47.605 | 27.860 | 0.608             | 0.215             | 0.873          | 16.499         | 2.41%         | 0.00% |
|        |          |            |    | %F                  | 0.094  | 0.282  | -0.459  | 0.648  | 0.738             |                   |                |                |               |       |
|        |          |            |    | age total           | 0.089  | 0.264  | -0.429  | 0.606  | 0.738             |                   |                |                |               |       |
|        |          | Model B    | 37 | intercept           | -4.118 | 7.938  | -19.676 | 11.441 | 0.604             | 0.219             | 0.821          | 28.136         | 4.00%         | 0.00% |
|        |          |            |    | %F diff             | -0.236 | 0.493  | -1.202  | 0.730  | 0.632             |                   |                |                |               |       |
|        |          |            |    | age total           | 0.080  | 0.270  | -0.449  | 0.609  | 0.767             |                   |                |                |               |       |
| THcV   | Gender   | Total %F   | 61 | intercept           | 0.108  | 0.110  | -0.108  | 0.323  | 0.327             | <b>&lt;0.0001</b> | 0.354          | 0.073          | <b>86.56%</b> | 0.00% |
|        |          |            |    | mod                 | 0.002  | 0.002  | -0.002  | 0.005  | 0.354             |                   |                |                |               |       |
|        |          | HC %F      | 61 | intercept           | 0.113  | 0.106  | -0.095  | 0.321  | 0.288             | <b>&lt;0.0001</b> | 0.366          | 0.073          | <b>86.53%</b> | 0.00% |
|        |          |            |    | mod                 | 0.001  | 0.002  | -0.002  | 0.004  | 0.366             |                   |                |                |               |       |
|        |          | DEP %F     | 61 | intercept           | 0.122  | 0.111  | -0.095  | 0.338  | 0.272             | <b>&lt;0.0001</b> | 0.434          | 0.073          | <b>86.63%</b> | 0.00% |
|        |          |            |    | mod                 | 0.001  | 0.002  | -0.002  | 0.004  | 0.434             |                   |                |                |               |       |
|        |          | %F diff    | 61 | intercept           | 0.119  | 0.111  | -0.099  | 0.337  | 0.286             | <b>&lt;0.0001</b> | 0.654          | 0.075          | <b>86.66%</b> | 0.00% |
|        |          |            |    | HC %F               | 0.002  | 0.005  | -0.007  | 0.011  | 0.623             |                   |                |                |               |       |
|        |          |            |    | DEP %F              | -0.001 | 0.005  | -0.010  | 0.008  | 0.844             |                   |                |                |               |       |
|        |          |            |    | intercept           | 0.207  | 0.043  | 0.123   | 0.291  | <b>&lt;0.0001</b> | <b>&lt;0.0001</b> | 0.736          | 0.074          | <b>86.63%</b> | 0.00% |

**Appendix 1** to Espinoza Oyarce DA, Shaw ME, Alateeq K, et al. Volumetric brain differences in clinical depression in association with anxiety: a systematic review with meta-analysis. *J Psychiatry Neurosci* 2020.  
DOI: 10.1503/jpn.190156

Online appendices are unedited and posted as supplied by the authors.

| Region | Analysis     | Moderator     | k         | Mixed-Effects Model |        |        |        |               |                   |                   |          |                |                |       |
|--------|--------------|---------------|-----------|---------------------|--------|--------|--------|---------------|-------------------|-------------------|----------|----------------|----------------|-------|
|        |              |               |           | MD                  | SE     | 95% CI |        | p             | QEp               | QMp               | $\tau^2$ | I <sup>2</sup> | R <sup>2</sup> |       |
|        | Age          | Total Age     | 61        | mod                 | 0.002  | 0.005  | -0.007 | 0.010         | 0.736             |                   |          |                |                |       |
|        |              |               |           | intercept           | 0.197  | 0.059  | 0.081  | 0.312         | <b>0.001</b>      | <b>&lt;0.0001</b> | 0.902    | 0.074          | <b>86.67%</b>  | 0.00% |
|        | HC Age       | 61            | mod       | 0.000               | 0.003  | 0.123  | -0.005 | <b>0.006</b>  |                   |                   |          |                |                |       |
|        |              |               | intercept | 0.209               | 0.057  | 0.098  | 0.320  | <b>0.0002</b> | <b>&lt;0.0001</b> | 0.856             | 0.074    | <b>86.64%</b>  | 0.00%          |       |
|        | DEP Age      | 61            | mod       | -0.001              | 0.003  | -0.006 | 0.005  | 0.856         |                   |                   |          |                |                |       |
|        |              |               | intercept | 0.185               | 0.062  | 0.063  | 0.306  | <b>0.003</b>  | <b>&lt;0.0001</b> | 0.710             | 0.074    | <b>86.66%</b>  | 0.00%          |       |
|        | mod          | 0.001         | 0.003     | -0.005              | 0.007  | 0.710  |        |               |                   |                   |          |                |                |       |
| THcV   | Age          | HC/DEP Age    | 61        | intercept           | 0.148  | 0.064  | 0.023  | 0.274         | <b>0.020</b>      | <b>&lt;0.0001</b> | 0.146    | 0.071          | <b>85.48%</b>  | 1.86% |
|        |              |               |           | HC age              | -0.019 | 0.010  | -0.037 | 0.000         | 0.054             |                   |          |                |                |       |
|        |              |               |           | DEP age             | 0.020  | 0.010  | 0.000  | 0.040         | 0.051             |                   |          |                |                |       |
|        | Segmentation | Man/Auto      | 61        | intercept           | 0.119  | 0.064  | -0.008 | 0.245         | 0.065             | <b>&lt;0.0001</b> | 0.099    | 0.071          | <b>84.92%</b>  | 2.45% |
|        |              |               |           | mod                 | 0.135  | 0.082  | -0.025 | 0.296         | 0.099             |                   |          |                |                |       |
|        | Medication   | %Med          | 33        | intercept           | 0.128  | 0.087  | -0.042 | 0.298         | 0.140             | <b>&lt;0.0001</b> | 0.205    | 0.086          | <b>87.34%</b>  | 0.00% |
|        |              |               |           | %med                | 0.002  | 0.002  | -0.001 | 0.005         | 0.205             |                   |          |                |                |       |
|        | Symptoms     | HDS-17        | 22        | intercept           | 0.240  | 0.268  | -0.285 | 0.766         | 0.370             | <b>&lt;0.0001</b> | 0.850    | 0.087          | <b>84.76%</b>  | 0.00% |
|        |              |               |           | HDS-17              | 0.003  | 0.014  | -0.024 | 0.029         | 0.850             |                   |          |                |                |       |
|        | Model        | Model A       | 61        | intercept           | 0.107  | 0.115  | -0.119 | 0.332         | 0.354             | <b>&lt;0.0001</b> | 0.654    | 0.075          | <b>86.65%</b>  | 0.00% |
|        |              |               |           | %F                  | 0.002  | 0.002  | -0.002 | 0.005         | 0.361             |                   |          |                |                |       |
|        |              |               |           | age total           | 0.000  | 0.003  | -0.006 | 0.006         | 0.986             |                   |          |                |                |       |
|        |              | Model B       | 61        | intercept           | 0.199  | 0.060  | 0.082  | 0.317         | <b>0.001</b>      | <b>&lt;0.0001</b> | 0.930    | 0.075          | <b>86.70%</b>  | 0.00% |
|        |              |               |           | %F diff             | 0.002  | 0.005  | -0.007 | 0.011         | 0.718             |                   |          |                |                |       |
|        | age total    | 0.001         | 0.003     | -0.005              | 0.006  | 0.854  |        |               |                   |                   |          |                |                |       |
|        | Model + Seg  | Model A + Seg | 61        | intercept           | 0.069  | 0.117  | -0.160 | 0.299         | 0.554             | <b>&lt;0.0001</b> | 0.379    | 0.073          | <b>84.96%</b>  | 0.00% |



**Appendix 1** to Espinoza Oyarce DA, Shaw ME, Alateeq K, et al. Volumetric brain differences in clinical depression in association with anxiety: a systematic review with meta-analysis. *J Psychiatry Neurosci* 2020.  
DOI: 10.1503/jpn.190156

Online appendices are unedited and posted as supplied by the authors.

| Region      | Analysis | Moderator     | k         | Mixed-Effects Model |           |        |        |        |                   |                   |                   |                |               |               |       |
|-------------|----------|---------------|-----------|---------------------|-----------|--------|--------|--------|-------------------|-------------------|-------------------|----------------|---------------|---------------|-------|
|             |          |               |           | MD                  | SE        | 95% CI | p      | QEp    | QMp               | $\tau^2$          | I <sup>2</sup>    | R <sup>2</sup> |               |               |       |
|             |          | Model B + Seg | 61        | %F                  | 0.001     | 0.002  | -0.002 | 0.004  | 0.539             |                   |                   |                |               |               |       |
|             |          |               |           | age total           | -0.001    | 0.003  | -0.006 | 0.005  | 0.797             |                   |                   |                |               |               |       |
|             |          |               |           | seg                 | 0.129     | 0.087  | -0.040 | 0.299  | 0.136             |                   |                   |                |               |               |       |
|             |          |               |           | intercept           | 0.124     | 0.073  | -0.019 | 0.267  | 0.090             | <b>&lt;0.0001</b> | 0.360             | 0.073          | <b>84.75%</b> | 0.00%         |       |
|             |          |               |           | %F diff             | 0.003     | 0.005  | -0.006 | 0.012  | 0.479             |                   |                   |                |               |               |       |
|             |          |               |           | age total           | 0.000     | 0.003  | -0.006 | 0.005  | 0.909             |                   |                   |                |               |               |       |
|             |          |               |           | seg                 | 0.151     | 0.087  | -0.018 | 0.321  | 0.080             |                   |                   |                |               |               |       |
| <b>RHcV</b> | Gender   | Total %F      | 50        | intercept           | 0.065     | 0.066  | -0.065 | 0.195  | 0.327             | <b>&lt;0.0001</b> | 0.427             | 0.017          | <b>77.00%</b> | 0.00%         |       |
|             |          |               |           | mod                 | 0.001     | 0.001  | -0.001 | 0.003  | 0.427             |                   |                   |                |               |               |       |
| <b>RHcV</b> | Gender   | HC %F         | 50        | intercept           | 0.063     | 0.064  | -0.062 | 0.188  | 0.320             | <b>&lt;0.0001</b> | 0.393             | 0.017          | <b>76.92%</b> | 0.00%         |       |
|             |          |               |           | mod                 | 0.001     | 0.001  | -0.001 | 0.003  | 0.393             |                   |                   |                |               |               |       |
|             |          | DEP %F        | 50        | intercept           | 0.072     | 0.068  | -0.061 | 0.205  | 0.289             | <b>&lt;0.0001</b> | 0.509             | 0.017          | <b>77.11%</b> | 0.00%         |       |
|             |          |               |           | mod                 | 0.001     | 0.001  | -0.001 | 0.003  | 0.509             |                   |                   |                |               |               |       |
|             |          | HC/DEP %F     | 50        | intercept           | 0.074     | 0.068  | -0.060 | 0.208  | 0.280             | <b>&lt;0.0001</b> | 0.625             | 0.017          | <b>77.20%</b> | 0.00%         |       |
|             |          |               |           | HC mod              | 0.002     | 0.003  | -0.004 | 0.008  | 0.479             |                   |                   |                |               |               |       |
|             |          |               |           | DEP mod             | -0.001    | 0.003  | -0.007 | 0.004  | 0.645             |                   |                   |                |               |               |       |
|             |          | %F diff       | 50        | intercept           | 0.121     | 0.025  | 0.071  | 0.170  | <b>&lt;0.0001</b> | <b>&lt;0.0001</b> | 0.526             | 0.017          | <b>76.73%</b> | 0.00%         |       |
|             |          |               |           | mod                 | 0.002     | 0.003  | -0.004 | 0.007  | 0.526             |                   |                   |                |               |               |       |
|             |          | Age           | Total Age | 50                  | intercept | 0.090  | 0.033  | 0.025  | 0.155             | <b>0.007</b>      | <b>&lt;0.0001</b> | 0.317          | 0.017         | <b>76.69%</b> | 0.00% |
|             |          |               |           |                     | mod       | 0.002  | 0.002  | -0.002 | 0.005             | 0.317             |                   |                |               |               |       |
|             |          |               | HC Age    | 50                  | intercept | 0.101  | 0.032  | 0.038  | 0.163             | <b>0.002</b>      | <b>&lt;0.0001</b> | 0.534          | 0.017         | <b>76.88%</b> | 0.00% |
|             |          |               |           |                     | mod       | 0.001  | 0.002  | -0.002 | 0.004             | 0.534             |                   |                |               |               |       |
|             |          |               | DEP Age   | 50                  | intercept | 0.080  | 0.035  | 0.011  | 0.149             | <b>0.022</b>      | <b>&lt;0.0001</b> | 0.205          | 0.017         | <b>76.46%</b> | 0.17% |
|             | mod      |               |           |                     | 0.002     | 0.002  | -0.001 | 0.005  | 0.205             |                   |                   |                |               |               |       |

**Appendix 1** to Espinoza Oyarce DA, Shaw ME, Alateeq K, et al. Volumetric brain differences in clinical depression in association with anxiety: a systematic review with meta-analysis. *J Psychiatry Neurosci* 2020.  
DOI: 10.1503/jpn.190156

Online appendices are unedited and posted as supplied by the authors.

| Region | Analysis     | Moderator  | k  | Mixed-Effects Model |        |        |        |       |       |          |                |                |        |       |
|--------|--------------|------------|----|---------------------|--------|--------|--------|-------|-------|----------|----------------|----------------|--------|-------|
|        |              |            |    | MD                  | SE     | 95% CI | p      | QEp   | QMp   | $\tau^2$ | I <sup>2</sup> | R <sup>2</sup> |        |       |
|        |              | HC/DEP Age | 37 | intercept           | 0.054  | 0.037  | -0.019 | 0.126 | 0.146 | <0.0001  | 0.056          | 0.015          | 73.86% | 7.22% |
|        |              |            |    | HC mod              | -0.010 | 0.005  | -0.020 | 0.000 | 0.043 |          |                |                |        |       |
|        |              |            |    | DEP mod             | 0.013  | 0.006  | 0.002  | 0.024 | 0.020 |          |                |                |        |       |
|        | Segmentation | Man/Auto   | 50 | intercept           | 0.056  | 0.040  | -0.023 | 0.135 | 0.165 | <0.0001  | 0.077          | 0.016          | 73.14% | 3.49% |
|        |              |            |    | mod                 | 0.086  | 0.049  | -0.009 | 0.182 | 0.077 |          |                |                |        |       |
|        | Medication   | %Med       | 28 | intercept           | 0.106  | 0.050  | 0.008  | 0.204 | 0.035 | <0.0001  | 0.602          | 0.019          | 76.68% | 0.00% |
|        |              |            |    | %med                | 0.000  | 0.001  | -0.001 | 0.002 | 0.602 |          |                |                |        |       |
|        | Symptoms     | HDS-17     | 19 | intercept           | 0.162  | 0.143  | -0.118 | 0.442 | 0.258 | <0.0001  | 0.914          | 0.016          | 70.54% | 0.00% |
|        |              |            |    | HDS-17              | -0.001 | 0.007  | -0.015 | 0.013 | 0.914 |          |                |                |        |       |

|  |             |               |           |           |       |        |        |       |       |         |       |       |        |       |
|--|-------------|---------------|-----------|-----------|-------|--------|--------|-------|-------|---------|-------|-------|--------|-------|
|  | Model       | Model A       | 50        | intercept | 0.044 | 0.070  | -0.093 | 0.181 | 0.527 | <0.0001 | 0.460 | 0.017 | 77.07% | 0.00% |
|  |             |               |           | %F        | 0.001 | 0.001  | -0.001 | 0.003 | 0.454 |         |       |       |        |       |
|  |             |               |           | age total | 0.002 | 0.002  | -0.002 | 0.005 | 0.337 |         |       |       |        |       |
|  |             | Model B       | 50        | intercept | 0.094 | 0.034  | 0.028  | 0.160 | 0.005 | <0.0001 | 0.402 | 0.017 | 76.55% | 0.00% |
|  |             |               |           | %F diff   | 0.003 | 0.003  | -0.003 | 0.009 | 0.364 |         |       |       |        |       |
|  |             |               |           | age total | 0.002 | 0.002  | -0.001 | 0.005 | 0.234 |         |       |       |        |       |
|  | Model + Seg | Model A + Seg | 50        | intercept | 0.011 | 0.073  | -0.131 | 0.154 | 0.878 | <0.0001 | 0.265 | 0.017 | 73.67% | 0.00% |
|  |             |               |           | %F        | 0.001 | 0.001  | -0.001 | 0.002 | 0.628 |         |       |       |        |       |
|  |             |               |           | age total | 0.001 | 0.002  | -0.002 | 0.005 | 0.421 |         |       |       |        |       |
|  |             | Model B + Seg | 50        | seg       | 0.078 | 0.051  | -0.021 | 0.177 | 0.121 |         |       |       |        |       |
|  |             |               |           | intercept | 0.035 | 0.045  | -0.053 | 0.124 | 0.434 | <0.0001 | 0.133 | 0.016 | 72.40% | 2.82% |
|  |             |               |           | %F diff   | 0.004 | 0.003  | -0.002 | 0.010 | 0.179 |         |       |       |        |       |
|  |             |               | age total | 0.002     | 0.002 | -0.001 | 0.005  | 0.268 |       |         |       |       |        |       |

**Appendix 1** to Espinoza Oyarce DA, Shaw ME, Alateeq K, et al. Volumetric brain differences in clinical depression in association with anxiety: a systematic review with meta-analysis. *J Psychiatry Neurosci* 2020.  
DOI: 10.1503/jpn.190156

Online appendices are unedited and posted as supplied by the authors.

| Region  | Analysis     | Moderator  | k      | Mixed-Effects Model |        |        |        |       |         |          |                |                |        |       |
|---------|--------------|------------|--------|---------------------|--------|--------|--------|-------|---------|----------|----------------|----------------|--------|-------|
|         |              |            |        | MD                  | SE     | 95% CI | p      | QEp   | QMp     | $\tau^2$ | I <sup>2</sup> | R <sup>2</sup> |        |       |
|         |              |            |        | seg                 | 0.098  | 0.051  | -0.001 | 0.197 | 0.053   |          |                |                |        |       |
| LHeV    | Gender       | Total %F   | 50     | intercept           | 0.082  | 0.064  | -0.044 | 0.208 | 0.203   | <0.0001  | 0.709          | 0.017          | 77.40% | 0.00% |
|         |              |            |        | mod                 | 0.000  | 0.001  | -0.002 | 0.002 | 0.709   |          |                |                |        |       |
|         |              | HC %F      | 50     | intercept           | 0.080  | 0.062  | -0.042 | 0.202 | 0.197   | <0.0001  | 0.673          | 0.017          | 77.34% | 0.00% |
|         |              |            |        | mod                 | 0.000  | 0.001  | -0.001 | 0.002 | 0.673   |          |                |                |        |       |
|         |              | DEP %F     | 50     | intercept           | 0.090  | 0.066  | -0.039 | 0.219 | 0.173   | <0.0001  | 0.812          | 0.017          | 77.44% | 0.00% |
|         |              |            |        | mod                 | 0.000  | 0.001  | -0.002 | 0.002 | 0.812   |          |                |                |        |       |
|         |              | HC/DEP %F  | 50     | intercept           | 0.091  | 0.066  | -0.039 | 0.221 | 0.168   | <0.0001  | 0.800          | 0.018          | 77.41% | 0.00% |
|         |              |            |        | HC mod              | 0.002  | 0.003  | -0.004 | 0.008 | 0.533   |          |                |                |        |       |
| DEP mod | -0.002       | 0.003      | -0.007 | 0.004               | 0.606  |        |        |       |         |          |                |                |        |       |
| LHeV    | Gender       | %F diff    | 50     | intercept           | 0.111  | 0.025  | 0.061  | 0.160 | <0.0001 | <0.0001  | 0.548          | 0.017          | 76.97% | 0.00% |
|         |              |            |        | mod                 | 0.002  | 0.003  | -0.004 | 0.007 | 0.548   |          |                |                |        |       |
|         | Age          | Total Age  | 50     | intercept           | 0.104  | 0.034  | 0.038  | 0.169 | 0.002   | <0.0001  | 0.975          | 0.017          | 77.35% | 0.00% |
|         |              |            |        | mod                 | 0.000  | 0.002  | -0.003 | 0.003 | 0.975   |          |                |                |        |       |
| LHeV    | Age          | HC Age     | 50     | intercept           | 0.108  | 0.032  | 0.046  | 0.171 | 0.001   | <0.0001  | 0.855          | 0.017          | 77.23% | 0.00% |
|         |              |            |        | mod                 | 0.000  | 0.002  | -0.003 | 0.003 | 0.855   |          |                |                |        |       |
|         |              | DEP Age    | 50     | intercept           | 0.101  | 0.036  | 0.031  | 0.170 | 0.005   | <0.0001  | 0.884          | 0.017          | 77.39% | 0.00% |
|         |              |            |        | mod                 | 0.000  | 0.002  | -0.003 | 0.004 | 0.884   |          |                |                |        |       |
|         |              | HC/DEP Age | 50     | intercept           | 0.086  | 0.038  | 0.012  | 0.161 | 0.024   | <0.0001  | 0.547          | 0.018          | 76.35% | 0.00% |
|         |              |            |        | HC mod              | -0.006 | 0.005  | -0.016 | 0.005 | 0.276   |          |                |                |        |       |
|         | DEP mod      | 0.006      | 0.006  | -0.005              | 0.017  | 0.279  |        |       |         |          |                |                |        |       |
|         | Segmentation | Man/Auto   | 50     | intercept           | 0.053  | 0.041  | -0.027 | 0.132 | 0.195   | <0.0001  | 0.119          | 0.017          | 74.29% | 1.80% |
|         |              |            |        | mod                 | 0.076  | 0.049  | -0.020 | 0.172 | 0.119   |          |                |                |        |       |
|         | Medication   | %Med       | 28     | intercept           | 0.097  | 0.052  | -0.005 | 0.198 | 0.061   | <0.0001  | 0.720          | 0.022          | 80.44% | 0.00% |

**Appendix 1** to Espinoza Oyarce DA, Shaw ME, Alateeq K, et al. Volumetric brain differences in clinical depression in association with anxiety: a systematic review with meta-analysis. *J Psychiatry Neurosci* 2020.  
DOI: 10.1503/jpn.190156

Online appendices are unedited and posted as supplied by the authors.

| Region | Analysis    | Moderator     | k  | Mixed-Effects Model |       |        |        |       |       |          |                |                |        |       |  |
|--------|-------------|---------------|----|---------------------|-------|--------|--------|-------|-------|----------|----------------|----------------|--------|-------|--|
|        |             |               |    | MD                  | SE    | 95% CI | p      | QEp   | QMp   | $\tau^2$ | I <sup>2</sup> | R <sup>2</sup> |        |       |  |
|        |             |               |    | %med                | 0.000 | 0.001  | -0.001 | 0.002 | 0.720 |          |                |                |        |       |  |
|        | Symptoms    | HDS-17        | 19 | intercept           | 0.136 | 0.154  | -0.166 | 0.437 | 0.378 | <0.0001  | 0.940          | 0.026          | 80.36% | 0.00% |  |
|        |             |               |    | HDS-17              | 0.001 | 0.008  | -0.015 | 0.016 | 0.940 |          |                |                |        |       |  |
|        | Model       | Model A       | 50 | intercept           | 0.081 | 0.069  | -0.053 | 0.215 | 0.237 | <0.0001  | 0.931          | 0.018          | 77.75% | 0.00% |  |
|        |             |               |    | %F                  | 0.000 | 0.001  | -0.002 | 0.002 | 0.707 |          |                |                |        |       |  |
|        |             |               |    | age total           | 0.000 | 0.002  | -0.003 | 0.003 | 0.987 |          |                |                |        |       |  |
|        |             | Model B       | 50 | intercept           | 0.106 | 0.034  | 0.040  | 0.173 | 0.002 | <0.0001  | 0.826          | 0.018          | 77.27% | 0.00% |  |
|        |             |               |    | %F diff             | 0.002 | 0.003  | -0.004 | 0.008 | 0.536 |          |                |                |        |       |  |
|        |             |               |    | age total           | 0.000 | 0.002  | -0.003 | 0.004 | 0.855 |          |                |                |        |       |  |
|        | Model + Seg | Model A + Seg | 50 | intercept           | 0.046 | 0.072  | -0.096 | 0.187 | 0.529 | <0.0001  | 0.493          | 0.018          | 74.87% | 0.00% |  |
|        |             |               |    | %F                  | 0.000 | 0.001  | -0.002 | 0.002 | 0.870 |          |                |                |        |       |  |
|        |             |               |    | age total           | 0.000 | 0.002  | -0.003 | 0.003 | 0.902 |          |                |                |        |       |  |
|        |             |               |    | seg                 | 0.076 | 0.051  | -0.023 | 0.175 | 0.132 |          |                |                |        |       |  |

|             |               |               |    |           |        |        |         |        |       |         |       |         |        |        |
|-------------|---------------|---------------|----|-----------|--------|--------|---------|--------|-------|---------|-------|---------|--------|--------|
| <b>LHcV</b> | Model + Seg   | Model B + Seg | 50 | intercept | 0.052  | 0.046  | -0.038  | 0.142  | 0.260 | <0.0001 | 0.330 | 0.017   | 73.91% | 0.00%  |
|             |               |               |    | %F diff   | 0.003  | 0.003  | -0.003  | 0.009  | 0.312 |         |       |         |        |        |
|             |               |               |    | age total | 0.000  | 0.002  | -0.003  | 0.004  | 0.910 |         |       |         |        |        |
|             |               |               |    | seg       | 0.089  | 0.051  | -0.011  | 0.189  | 0.082 |         |       |         |        |        |
| <b>ICV</b>  | <b>Gender</b> | Total %F      | 59 | intercept | 21.086 | 14.643 | -7.613  | 49.785 | 0.150 | 0.078   | 0.273 | 197.521 | 19.01% | 10.53% |
|             |               |               |    | mod       | -0.218 | 0.199  | -0.608  | 0.172  | 0.273 |         |       |         |        |        |
|             |               | HC %F         | 59 | intercept | 24.749 | 13.922 | -2.539  | 52.036 | 0.076 | 0.090   | 0.151 | 184.124 | 17.94% | 16.59% |
|             |               |               |    | mod       | -0.275 | 0.192  | -0.651  | 0.101  | 0.151 |         |       |         |        |        |
|             |               | DEP %F        | 59 | intercept | 13.820 | 15.074 | -15.725 | 43.364 | 0.359 | 0.066   | 0.577 | 221.715 | 20.93% | 0.00%  |

**Appendix 1** to Espinoza Oyarce DA, Shaw ME, Alateeq K, et al. Volumetric brain differences in clinical depression in association with anxiety: a systematic review with meta-analysis. *J Psychiatry Neurosci* 2020.  
DOI: 10.1503/jpn.190156

Online appendices are unedited and posted as supplied by the authors.

| Region    | Analysis  | Moderator  | k         | Mixed-Effects Model |           |        |         |              |        |              |          |                |                |        |              |         |        |        |
|-----------|-----------|------------|-----------|---------------------|-----------|--------|---------|--------------|--------|--------------|----------|----------------|----------------|--------|--------------|---------|--------|--------|
|           |           |            |           | MD                  | SE        | 95% CI |         | p            | QEp    | QMp          | $\tau^2$ | I <sup>2</sup> | R <sup>2</sup> |        |              |         |        |        |
|           | HC/DEP %F | %F diff    | 59        | mod                 | -0.112    | 0.201  | -0.505  | 0.281        | 0.577  | 0.131        | 0.066    | 171.708        | 16.92%         | 22.22% |              |         |        |        |
|           |           |            |           | intercept           | 15.668    | 14.692 | -13.127 | 44.463       | 0.286  |              |          |                |                |        |              |         |        |        |
|           |           |            | HC %F     | -1.087              | 0.483     | -2.033 | -0.141  | <b>0.024</b> |        |              |          |                |                |        |              |         |        |        |
|           |           |            | DEP %F    | 0.903               | 0.494     | -0.065 | 1.870   | 0.067        |        |              |          |                |                |        |              |         |        |        |
|           |           |            | intercept | 2.606               | 4.619     | -6.447 | 11.658  | 0.573        | 0.130  |              |          |                |                |        | <b>0.033</b> | 171.398 | 17.38% | 22.36% |
|           |           |            | mod       | -1.020              | 0.477     | -1.956 | -0.085  | <b>0.033</b> |        |              |          |                |                |        |              |         |        |        |
|           | Age       | Total Age  | 59        | intercept           | 2.939     | 6.992  | -10.766 | 16.644       | 0.674  | 0.058        | 0.583    | 271.704        | 24.42%         | 0.00%  |              |         |        |        |
|           |           |            |           | mod                 | 0.163     | 0.297  | -0.419  | 0.745        | 0.583  |              |          |                |                |        |              |         |        |        |
|           |           | HC Age     | 59        | intercept           | 3.802     | 6.554  | -9.042  | 16.647       | 0.562  | 0.058        | 0.665    | 268.213        | 24.12%         | 0.00%  |              |         |        |        |
|           |           |            |           | mod                 | 0.121     | 0.281  | -0.429  | 0.672        | 0.665  |              |          |                |                |        |              |         |        |        |
|           |           | DEP Age    | 59        | intercept           | 0.799     | 7.562  | -14.022 | 15.620       | 0.916  | 0.061        | 0.401    | 273.527        | 24.57%         | 0.00%  |              |         |        |        |
|           |           |            |           | mod                 | 0.264     | 0.314  | -0.352  | 0.880        | 0.401  |              |          |                |                |        |              |         |        |        |
|           |           | HC/DEP Age | 59        | intercept           | -4.594    | 8.447  | -21.149 | 11.961       | 0.587  | 0.079        | 0.271    | 244.846        | 22.40%         | 0.00%  |              |         |        |        |
|           |           |            |           | HC age              | -1.417    | 1.019  | -3.414  | 0.580        | 0.164  |              |          |                |                |        |              |         |        |        |
|           | DEP age   |            |           | 1.778               | 1.138     | -0.454 | 4.009   | 0.118        |        |              |          |                |                |        |              |         |        |        |
|           | Model     | Model A    | 59        | intercept           | 17.827    | 16.393 | -14.302 | 49.957       | 0.277  | 0.066        | 0.530    | 253.142        | 22.67%         | 0.00%  |              |         |        |        |
|           |           |            |           | %F                  | -0.206    | 0.207  | -0.611  | 0.200        | 0.321  |              |          |                |                |        |              |         |        |        |
|           |           |            |           | age total           | 0.131     | 0.295  | -0.446  | 0.709        | 0.321  |              |          |                |                |        |              |         |        |        |
|           | ICV       | Model      | Model B   | 59                  | intercept | 1.894  | 6.726   | -11.289      | 15.077 | 0.778        | 0.112    | 0.107          | 208.772        | 19.81% | 5.43%        |         |        |        |
|           |           |            |           |                     | %F diff   | -1.011 | 0.492   | -1.976       | -0.047 | <b>0.040</b> |          |                |                |        |              |         |        |        |
| age total |           |            |           |                     | 0.042     | 0.289  | -0.525  | 0.609        | 0.885  |              |          |                |                |        |              |         |        |        |

**Appendix 1** to Espinoza Oyarce DA, Shaw ME, Alateeq K, et al. Volumetric brain differences in clinical depression in association with anxiety: a systematic review with meta-analysis. *J Psychiatry Neurosci* 2020.

DOI: 10.1503/jpn.190156

Online appendices are unedited and posted as supplied by the authors.

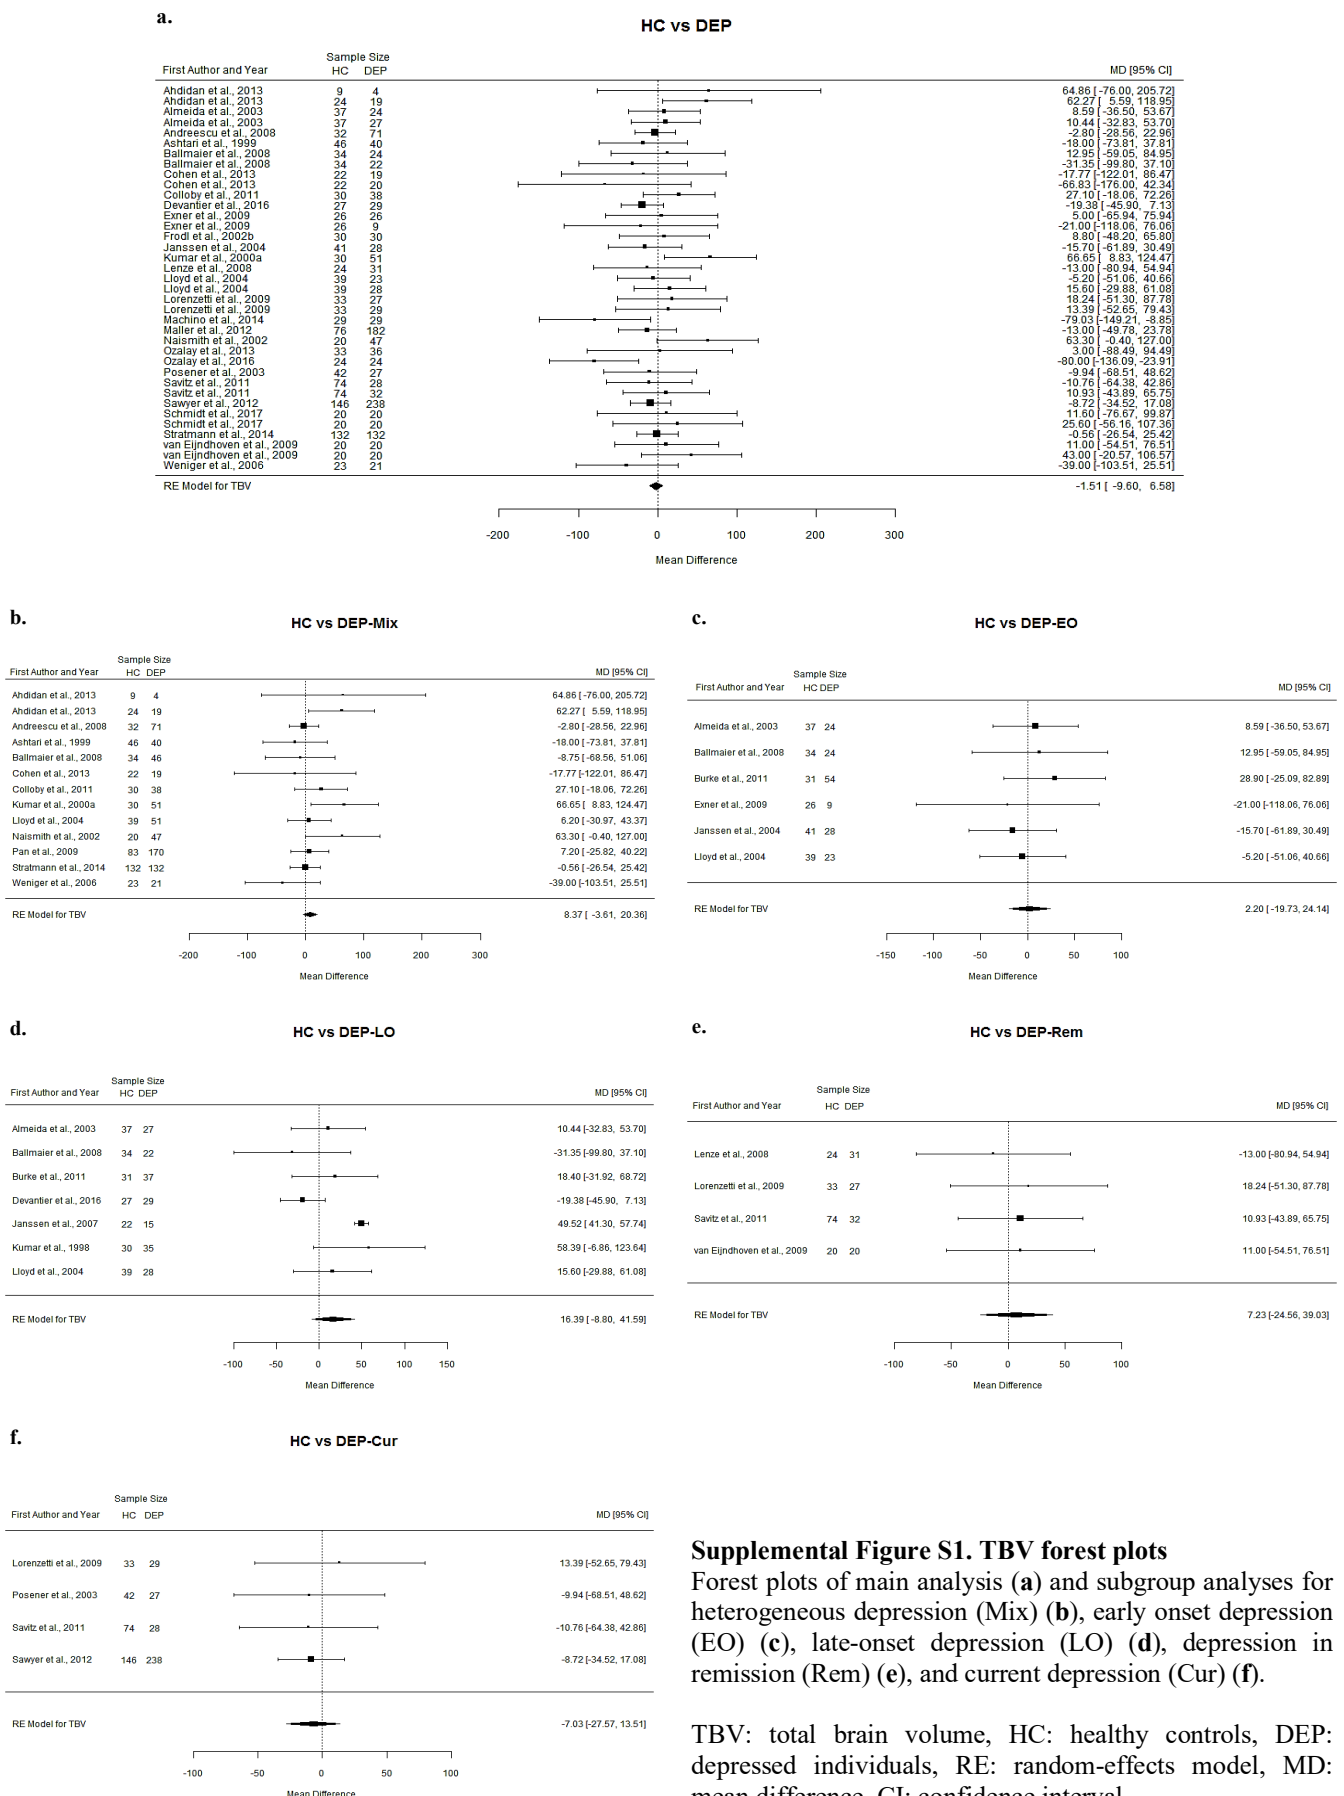

**Supplemental Figure S1. TBV forest plots**

Forest plots of main analysis (a) and subgroup analyses for heterogeneous depression (Mix) (b), early onset depression (EO) (c), late-onset depression (LO) (d), depression in remission (Rem) (e), and current depression (Cur) (f).

TBV: total brain volume, HC: healthy controls, DEP: depressed individuals, RE: random-effects model, MD: mean difference, CI: confidence interval.

Online appendices are unedited and posted as supplied by the authors.

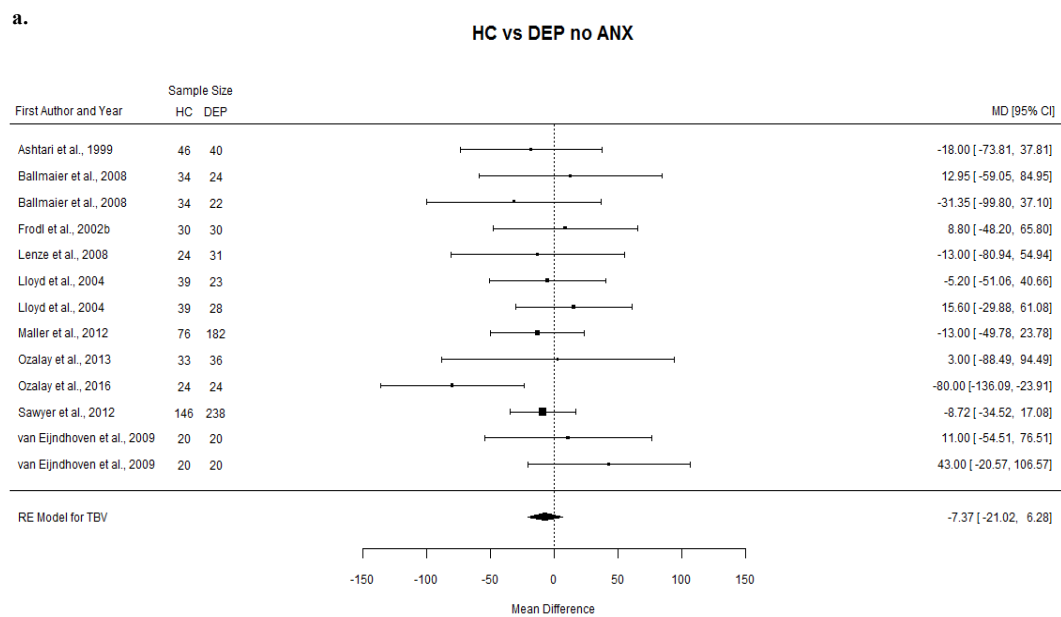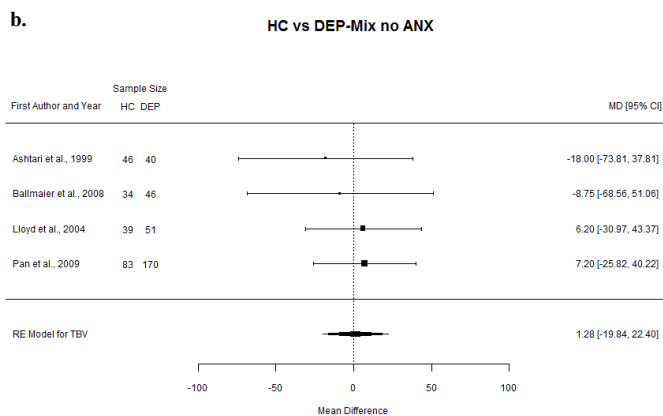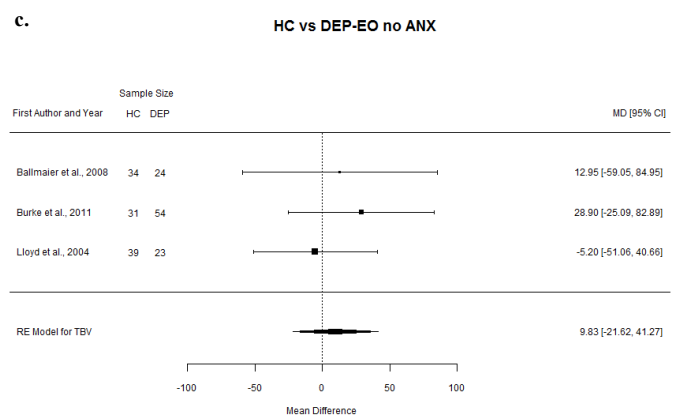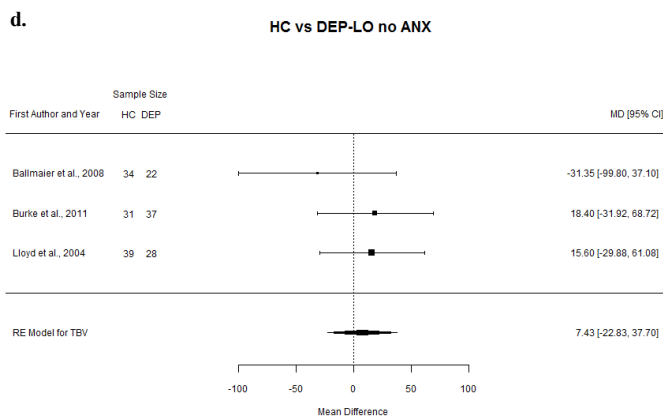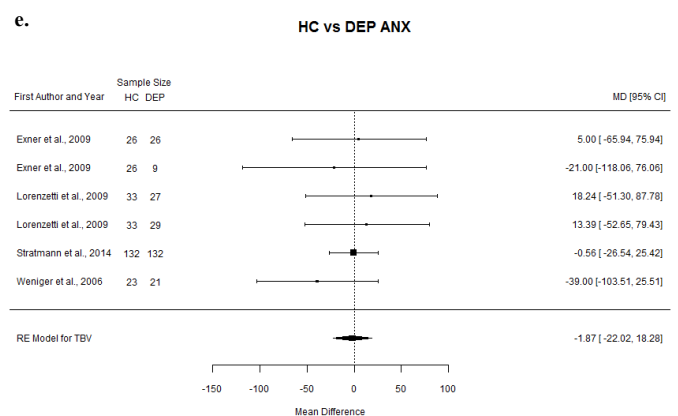

**Supplemental Figure S2. TBV assessment of anxiety comorbidity forest plots**

Forest plots of main analysis (a) and subgroup analyses for heterogeneous depression (Mix) (b), early-onset depression (EO) (c), and late-onset depression (LO) (d) excluding anxiety disorders (no ANX). Forest plot of main analysis comorbid with anxiety disorders (ANX) (e).

TBV: total brain volume, HC: healthy controls, DEP: depressed individuals, RE: random-effects model, MD: mean difference, CI: confidence interval.

Online appendices are unedited and posted as supplied by the authors.

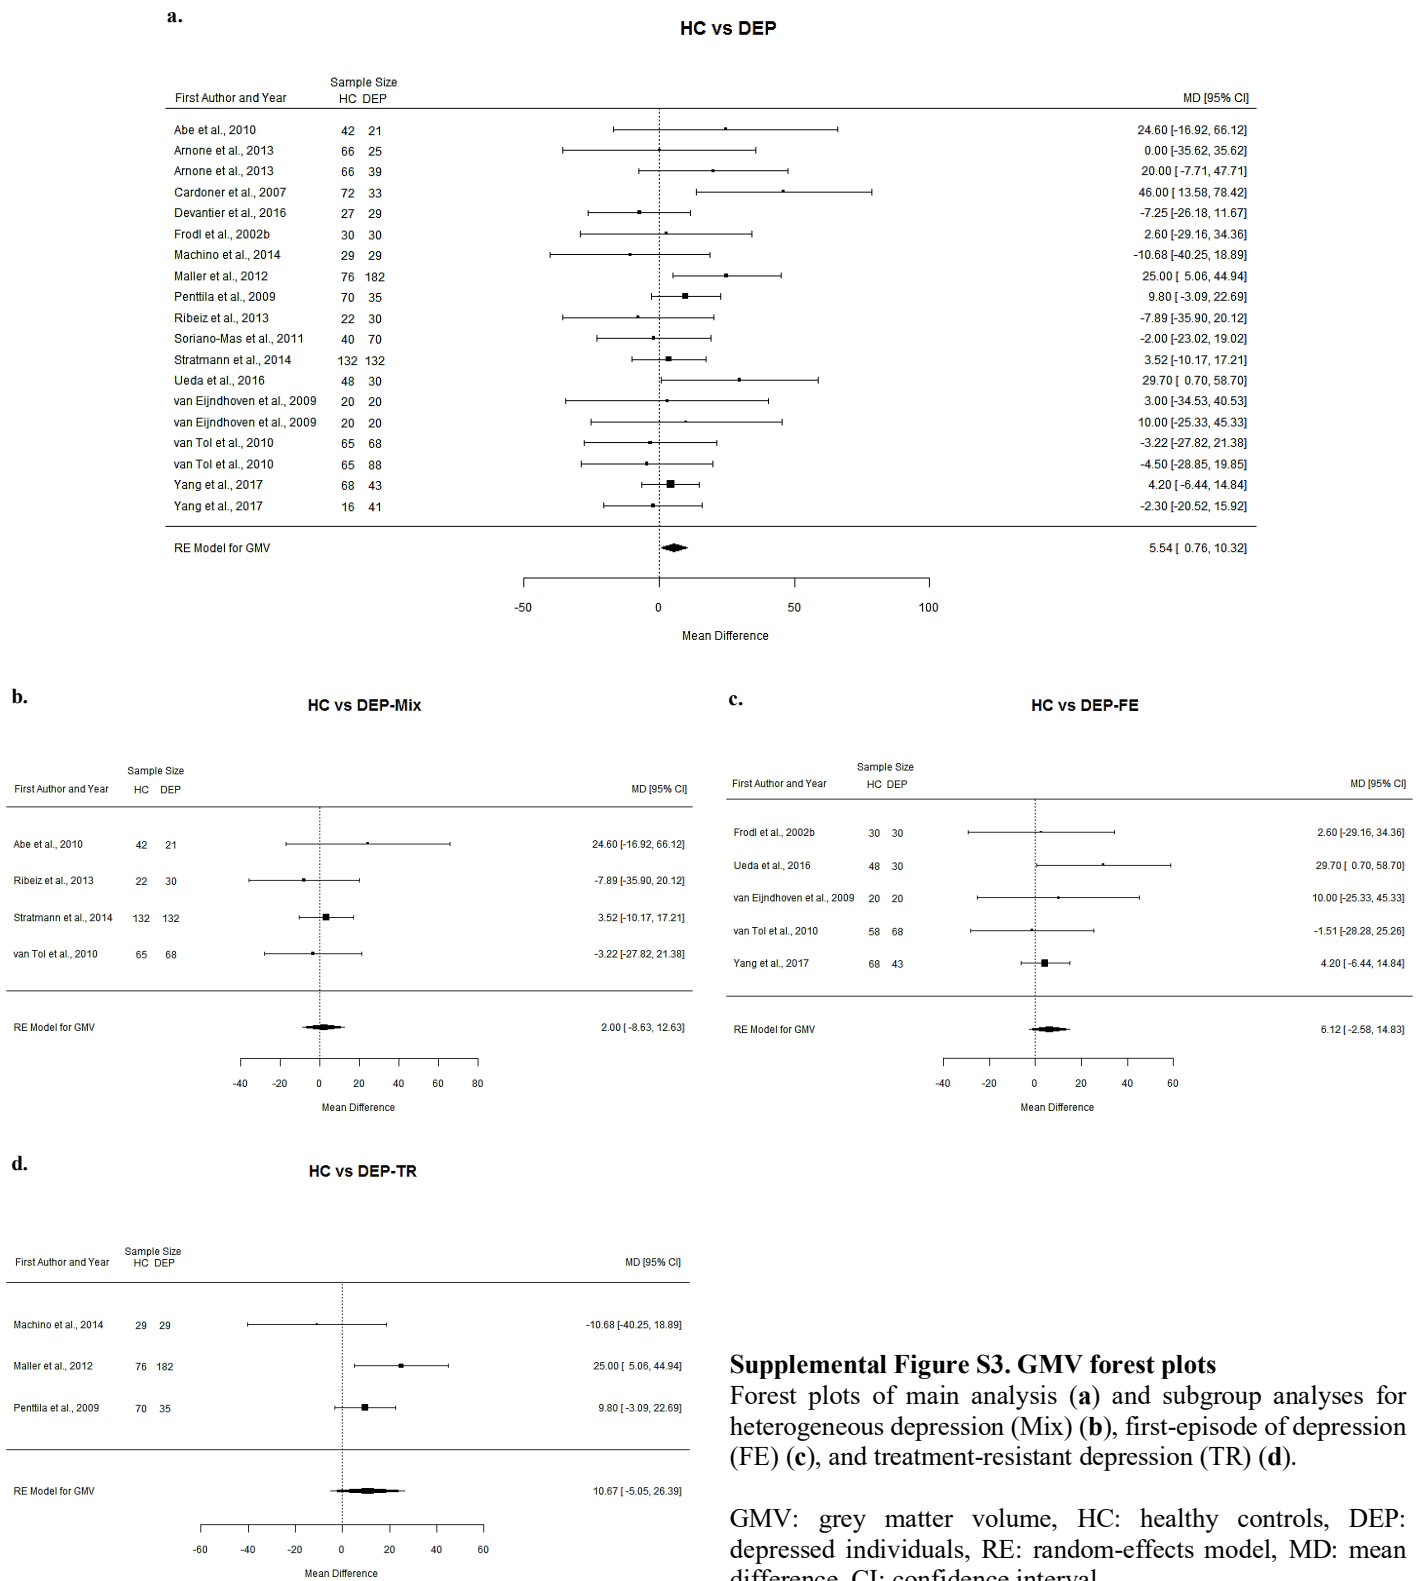

**Supplemental Figure S3. GMV forest plots**

Forest plots of main analysis (a) and subgroup analyses for heterogeneous depression (Mix) (b), first-episode of depression (FE) (c), and treatment-resistant depression (TR) (d).

GMV: grey matter volume, HC: healthy controls, DEP: depressed individuals, RE: random-effects model, MD: mean difference, CI: confidence interval.



Online appendices are unedited and posted as supplied by the authors.

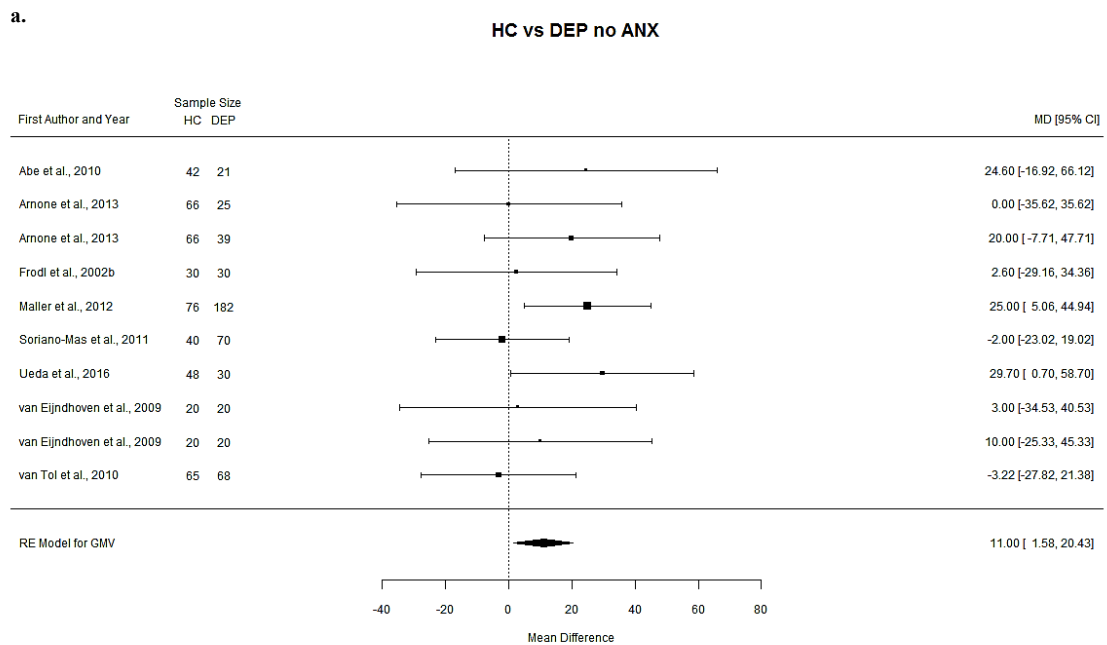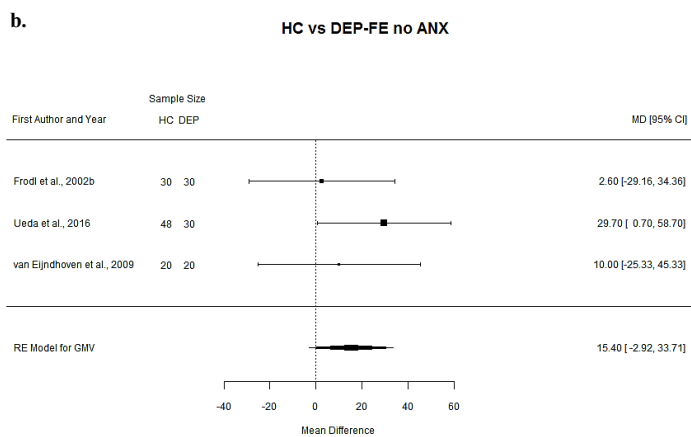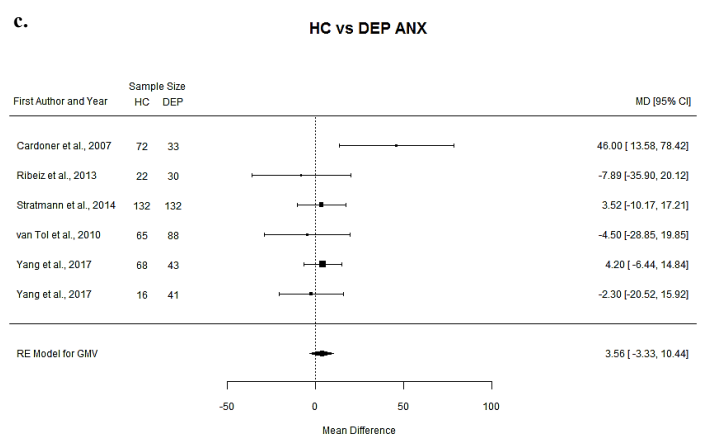

**Supplemental Figure S4. GMV assessment of anxiety comorbidity forest plots**

Forest plots of main analysis (a) and subgroup analysis for first-episode of depression (FE) (b) excluding anxiety disorders (no ANX). Forest plot of main analysis comorbid with anxiety disorders (ANX) (c).

GMV: grey mater volume, HC: healthy controls, DEP: depressed individuals, RE: random-effects model, MD: mean difference, CI: confidence interval.

**Appendix 1** to Espinoza Oyarce DA, Shaw ME, Alateeq K, et al. Volumetric brain differences in clinical depression in association with anxiety: a systematic review with meta-analysis. *J Psychiatry Neurosci* 2020.

**a.**

**HC vs DEP**

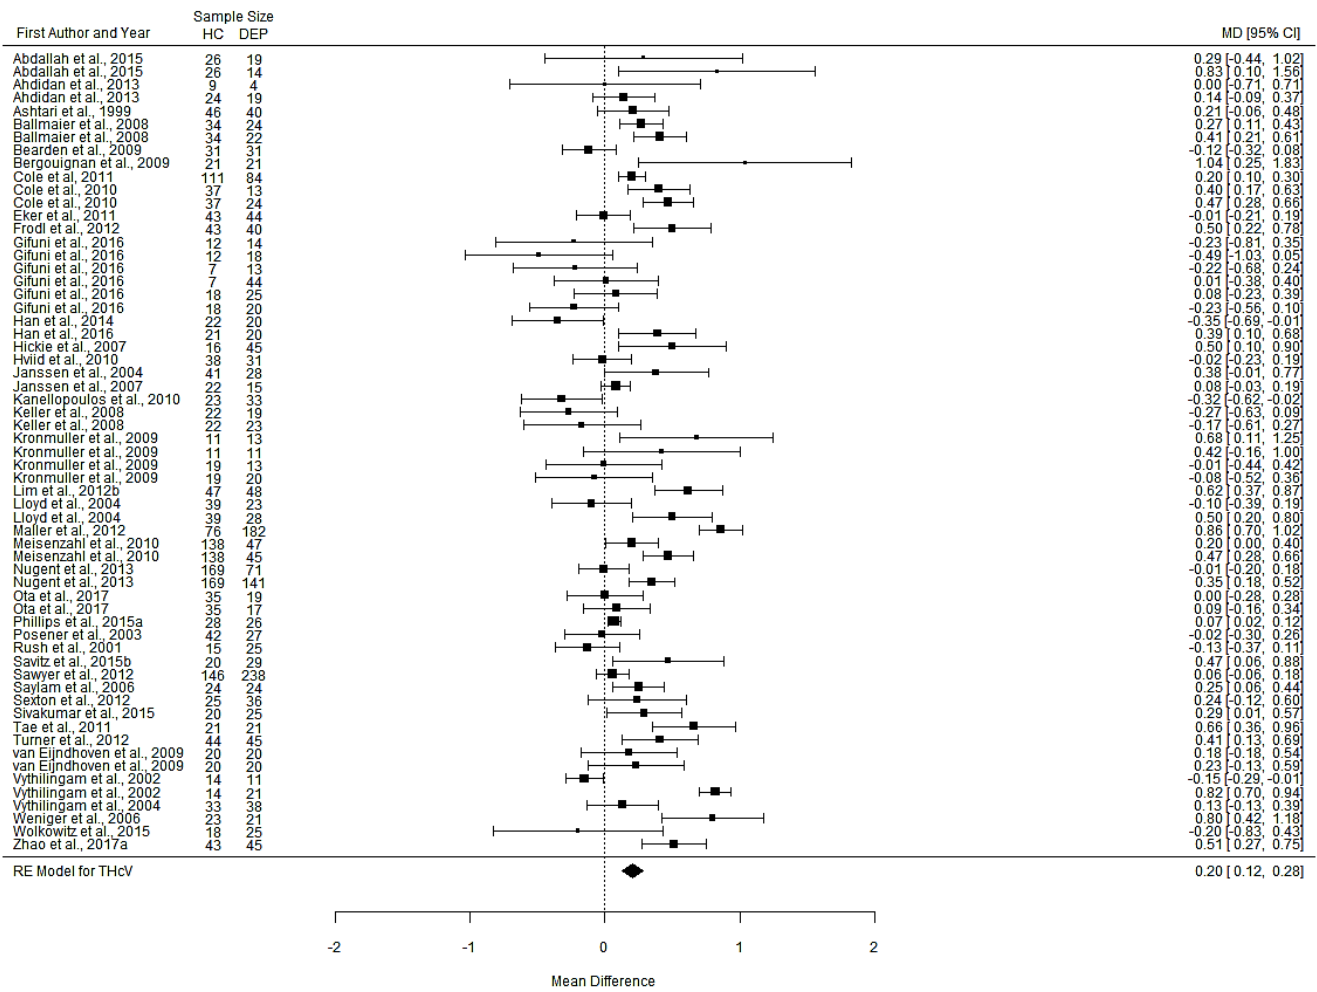

**b.**

**HC vs DEP-Mix**

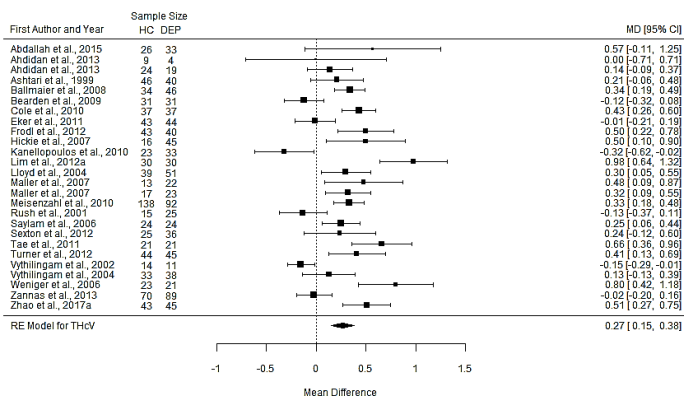

**c.**

**HC vs DEP-EO**

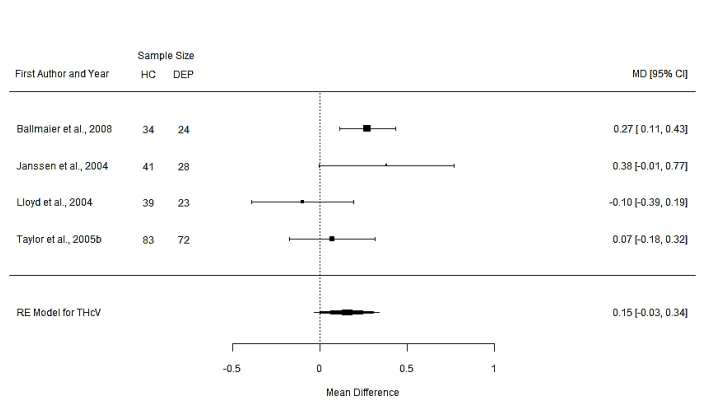

**d.**

**HC vs DEP-LO**

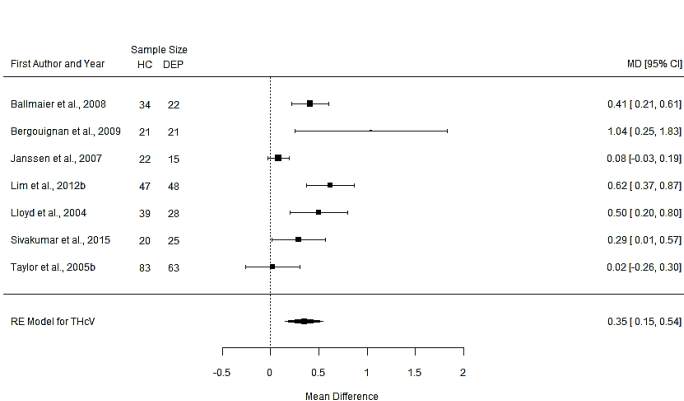

**Supplemental Figure S5. THcV forest plots**

Forest plots of main analysis (a) and subgroup analyses for heterogeneous depression (Mix) (b), early-onset depression (EO) (c), and late-onset depression (LO) (d).

THcV: total hippocampus volume, HC: healthy controls, DEP: depressed individuals, RE: random-effects model, MD: mean difference, CI: confidence interval.

Online appendices are unedited and posted as supplied by the authors.

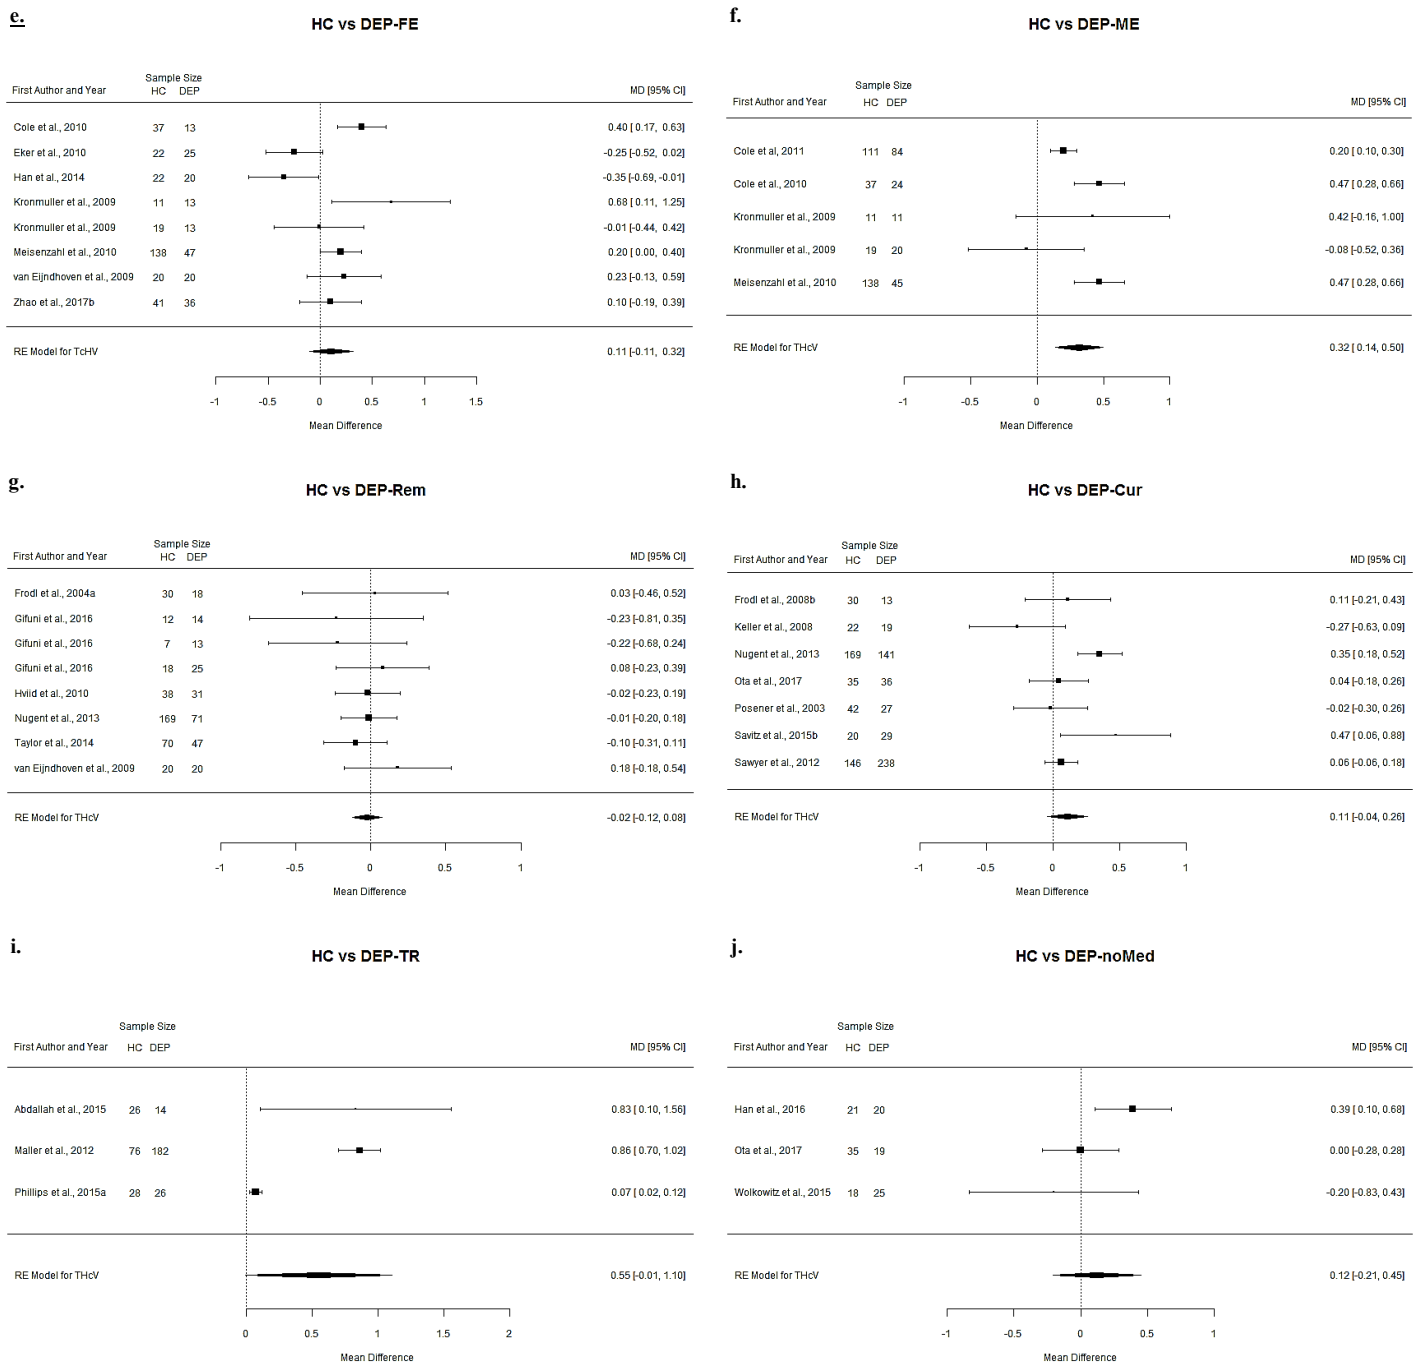

**Supplemental Figure S5. THeV forest plots (continued)**

Forest plots of subgroup analyses for first-episode of depression (FE) (e), multiple-episodes of depression (ME) (f), depression in remission (Rem) (g), current depression (Cur) (h), treatment-resistant depression (TR) (i), and non-medicated depression (noMED) (j).

THeV: total hippocampus volume, HC: healthy controls, DEP: depressed individuals, DEP-FE: first episode, RE: random-effects model, MD: mean difference, CI: confidence interval.

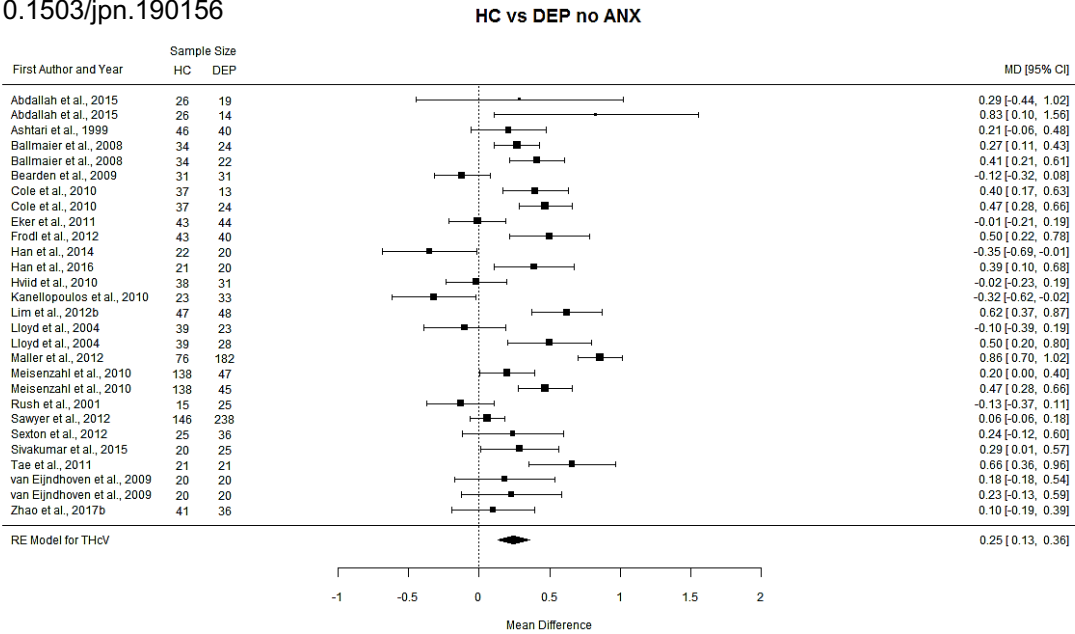

**b. HC vs DEP-Mix no ANX**

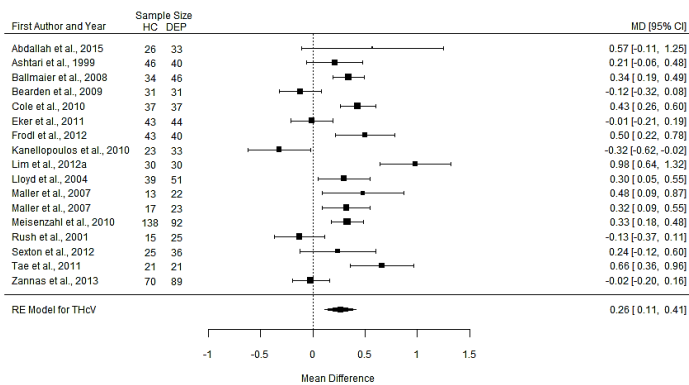

**c. HC vs DEP-EO no ANX**

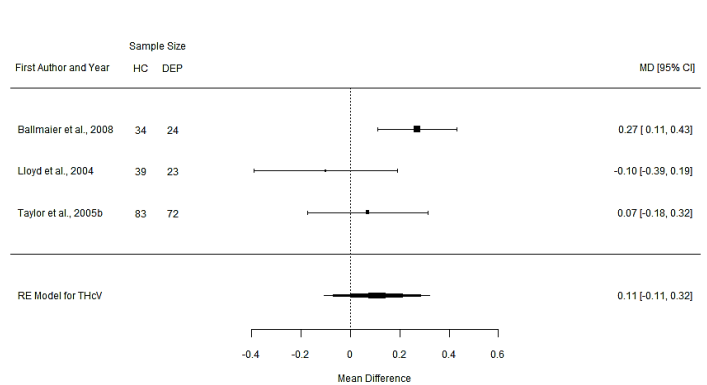

**d. HC vs DEP-LO no ANX**

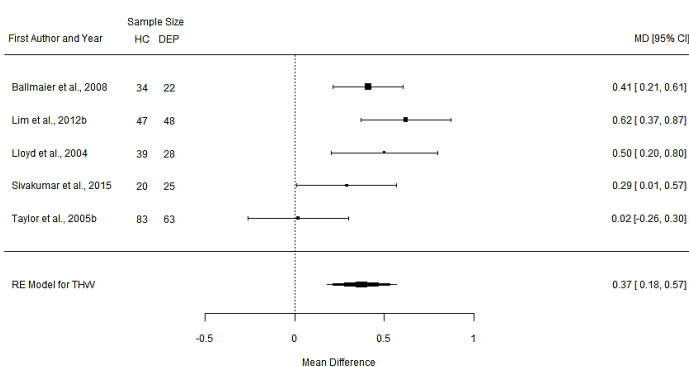

**e. HC vs DEP-FE no ANX**

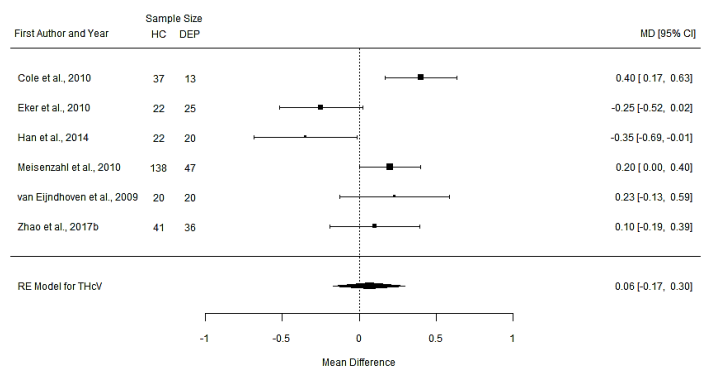

**f. HC vs DEP-Rem no ANX**

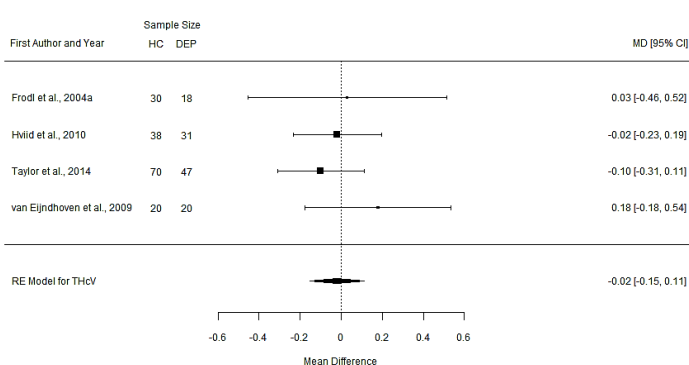

**Supplemental Figure S6. THcV assessment of anxiety comorbidity forest plots**

Forest plots of main analysis (a) and subgroup analyses for heterogeneous depression (Mix) (b), early-onset depression (EO) (c), late-onset depression (LO) (d), first-episode of depression (FE) (e), and depression in remission (Rem) (f) excluding anxiety disorders (no ANX).

THcV: total hippocampus volume, HC: healthy controls, DEP: depressed individuals, RE: random-effects model, MD: mean difference, CI: confidence interval.

Online appendices are unedited and posted as supplied by the authors.

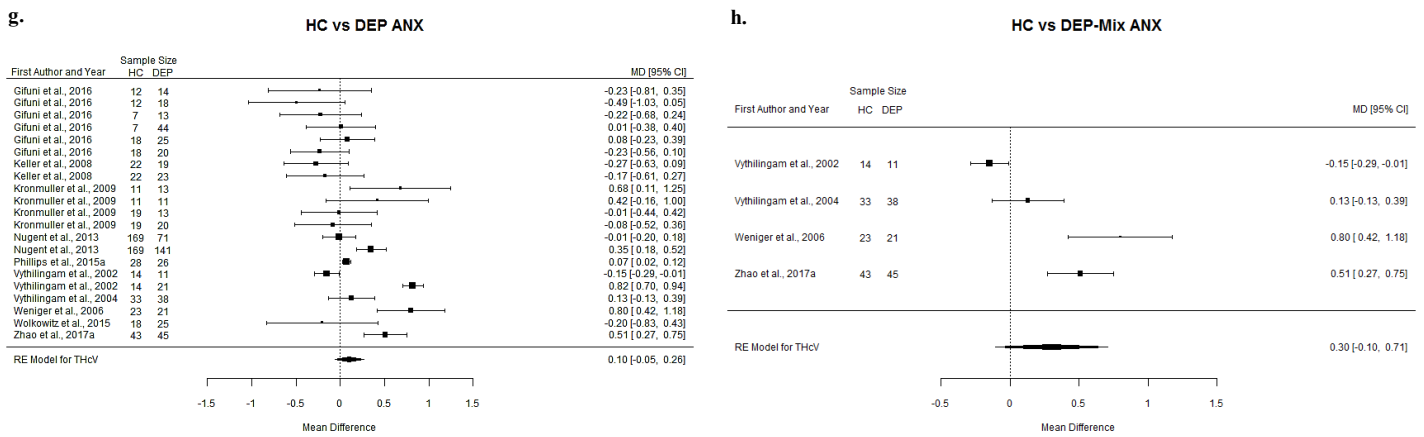

**Supplemental Figure S6. THcV assessment of anxiety comorbidity forest plots (continued)**

Forest plots of main analysis (g), and subgroup analysis for heterogeneous depression (Mix) (h) comorbid with anxiety disorders (ANX).

THcV: total hippocampus volume, HC: healthy controls, DEP: depressed individuals, RE: random-effects model, MD: mean difference, CI: confidence interval.

a.

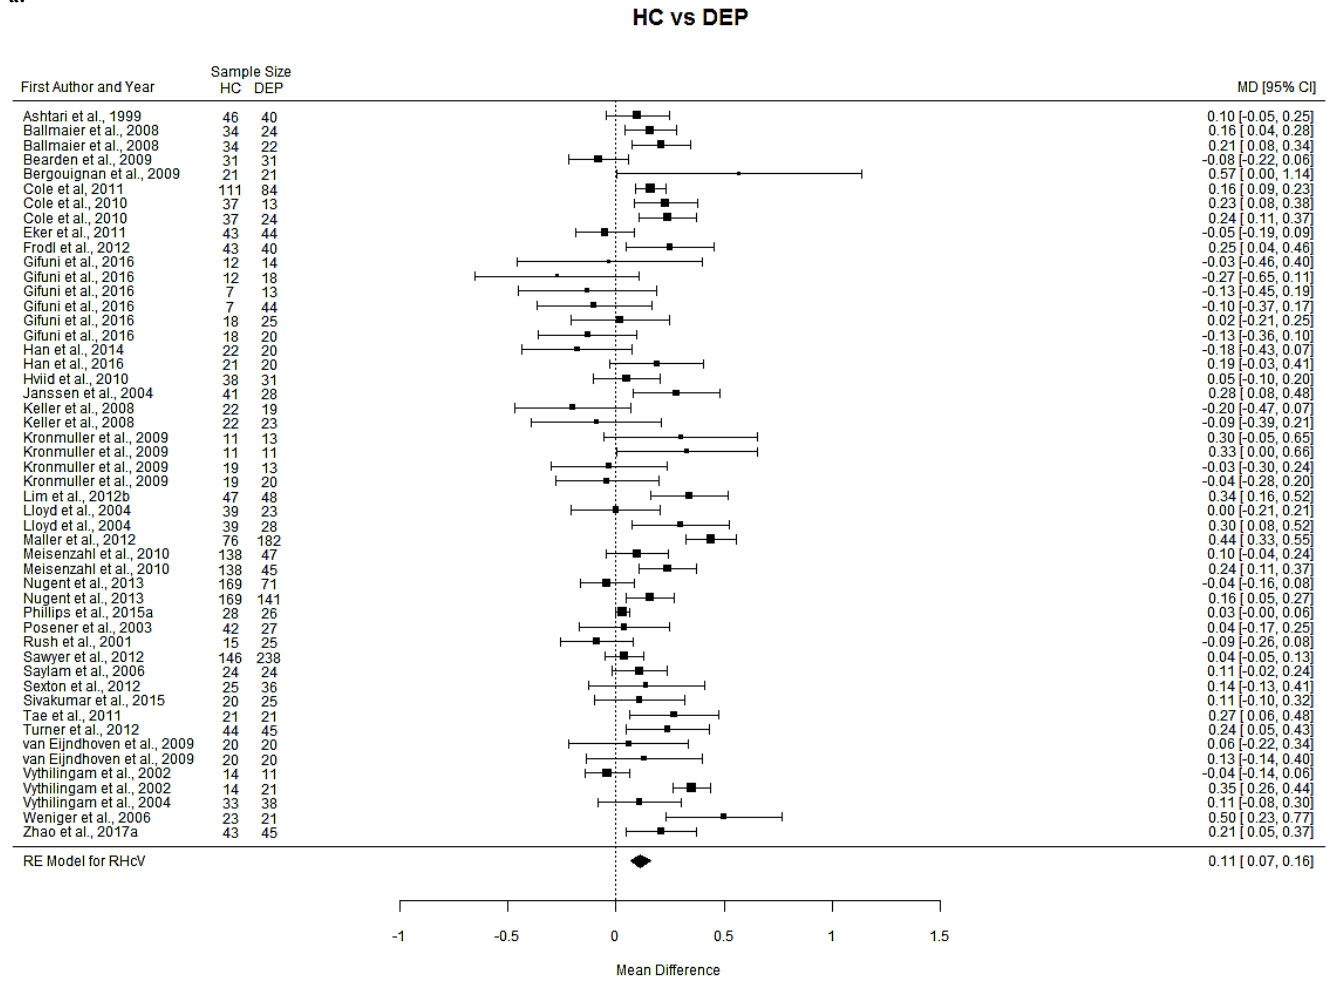

b.

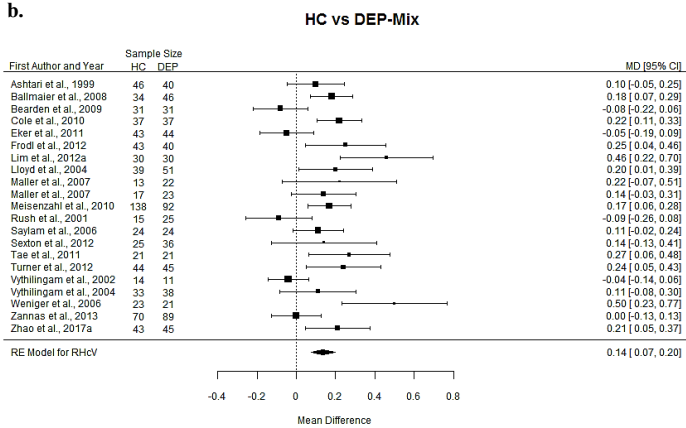

c.

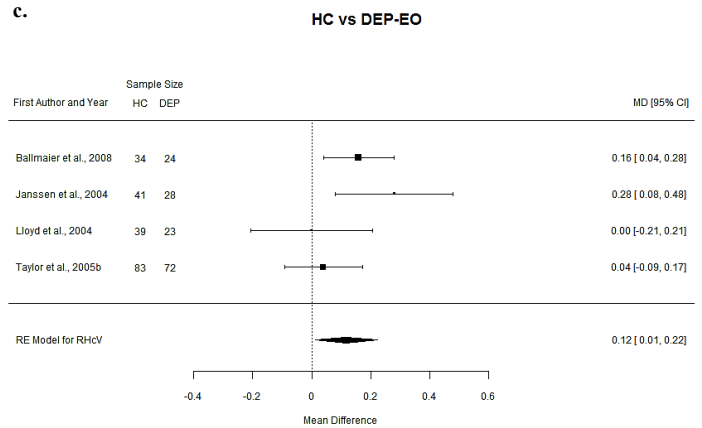

d.

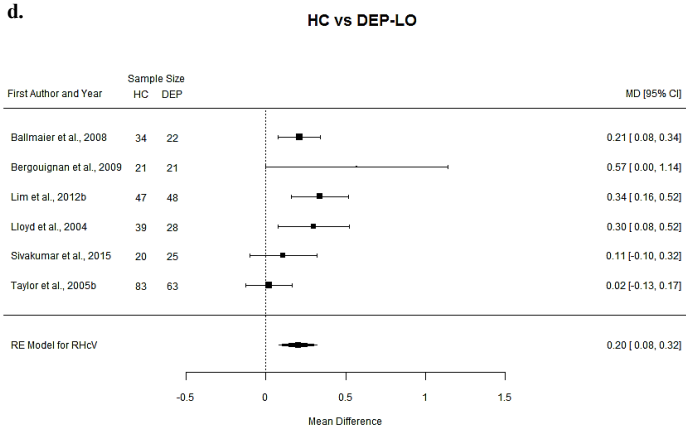

**Supplemental Figure S7. RHcV forest plots**

Forest plots of main analysis (a) and subgroup analyses for heterogeneous depression (Mix) (b), early-onset depression (EO) (c), and late-onset depression (LO) (d).

RHcV: right hippocampus volume, HC: healthy controls, DEP: depressed individuals, RE: random-effects model, MD: mean difference, CI: confidence interval.

Online appendices are unedited and posted as supplied by the authors.

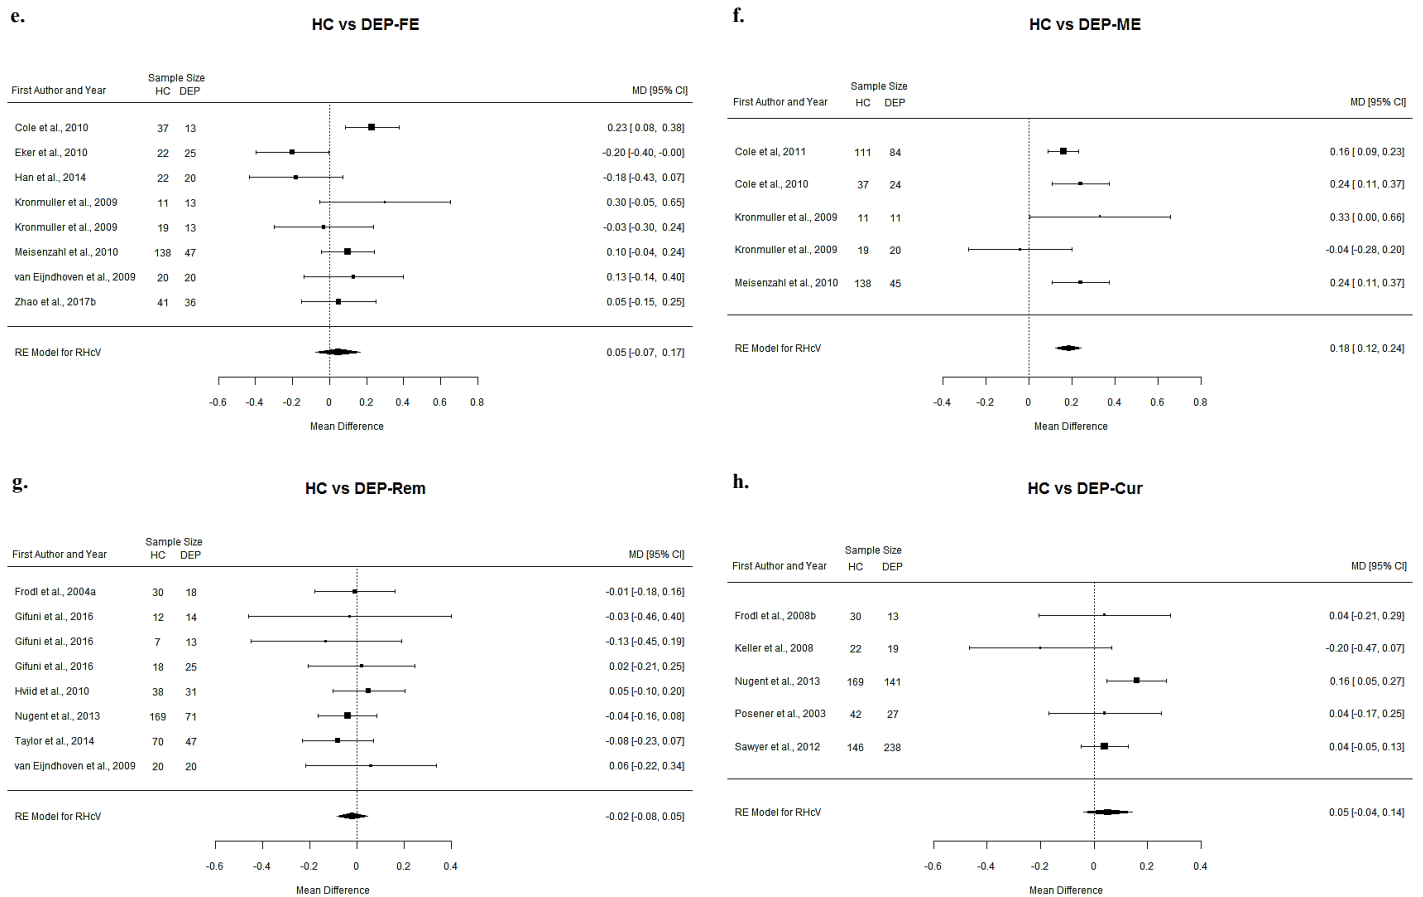

**Supplemental Figure S7. RHcV forest plots (continued)**

Forest plots of subgroup analyses for first-episode of depression (FE) (e), multiple-episodes of depression (ME) (f), depression in remission (Rem) (g), and current depression (Cur) (h).

RHcV: right hippocampus volume, HC: healthy controls, DEP: depressed individuals, RE: random-effects model, MD: mean difference, CI: confidence interval.

Online appendices are unedited and posted as supplied by the authors.

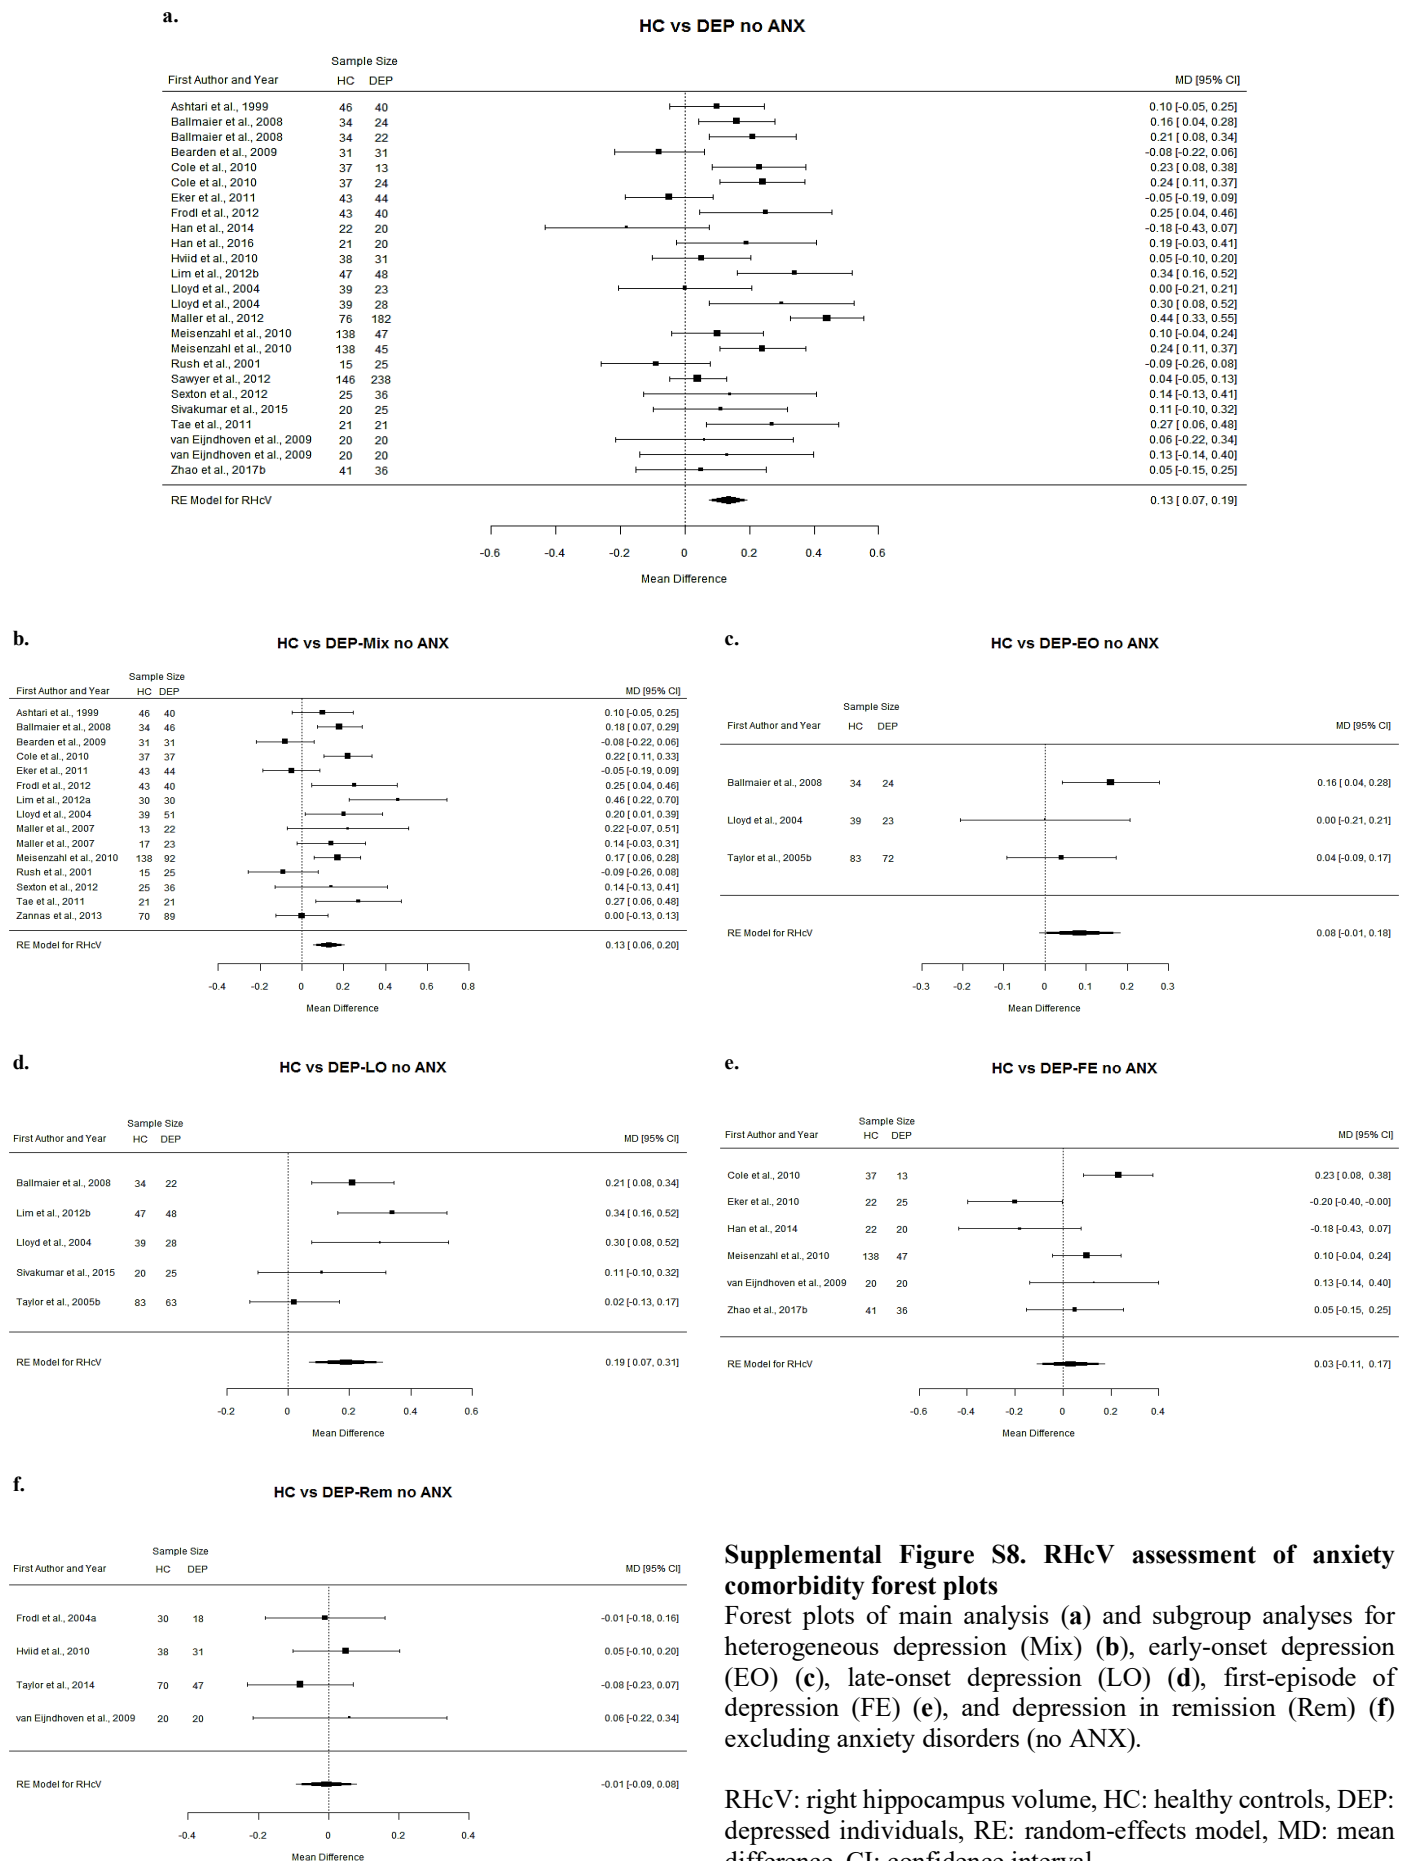

**Supplemental Figure S8. RHcV assessment of anxiety comorbidity forest plots**

Forest plots of main analysis (a) and subgroup analyses for heterogeneous depression (Mix) (b), early-onset depression (EO) (c), late-onset depression (LO) (d), first-episode of depression (FE) (e), and depression in remission (Rem) (f) excluding anxiety disorders (no ANX).

RHcV: right hippocampus volume, HC: healthy controls, DEP: depressed individuals, RE: random-effects model, MD: mean difference, CI: confidence interval.



Online appendices are unedited and posted as supplied by the authors.

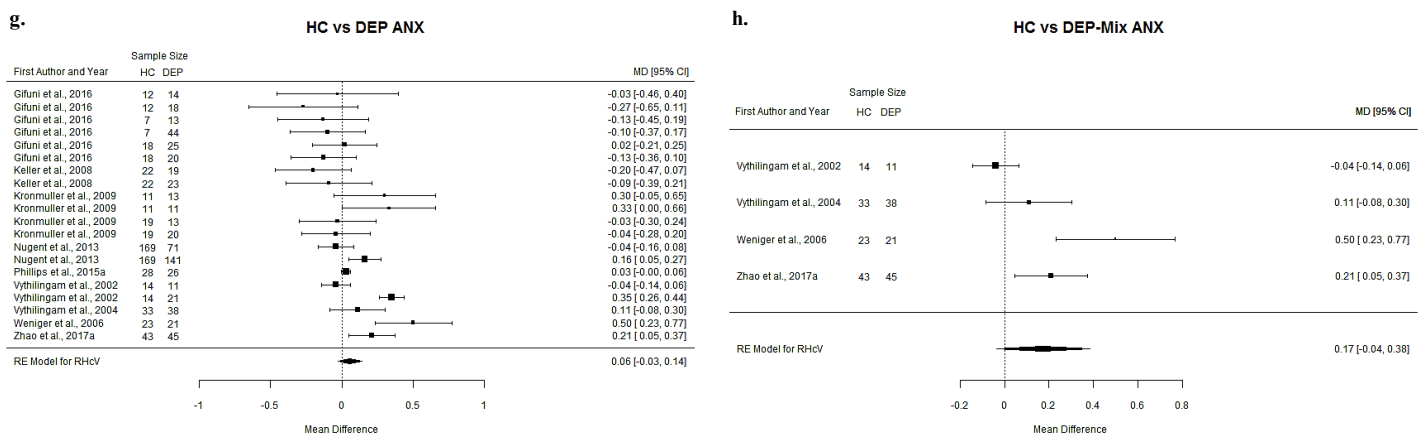

**Supplemental Figure S8. RHcV assessment of anxiety comorbidity forest plots (continued)**

Forest plots of main analysis (g), and subgroup analysis for heterogeneous depression (Mix) (h) comorbid with anxiety disorders (ANX).

RHcV: right hippocampus volume, HC: healthy controls, DEP: depressed individuals, RE: random-effects model, MD: mean difference, CI: confidence interval.

**Appendix 1** to Espinoza Oyarce DA, Shaw ME, Alateeq K, et al. Volumetric brain differences in clinical depression in association with anxiety: a systematic review with meta-analysis. *J Psychiatry Neurosci* 2020.

DOI: 10.1503/jpn.190156

Online appendices are unedited and posted as supplied by the authors.

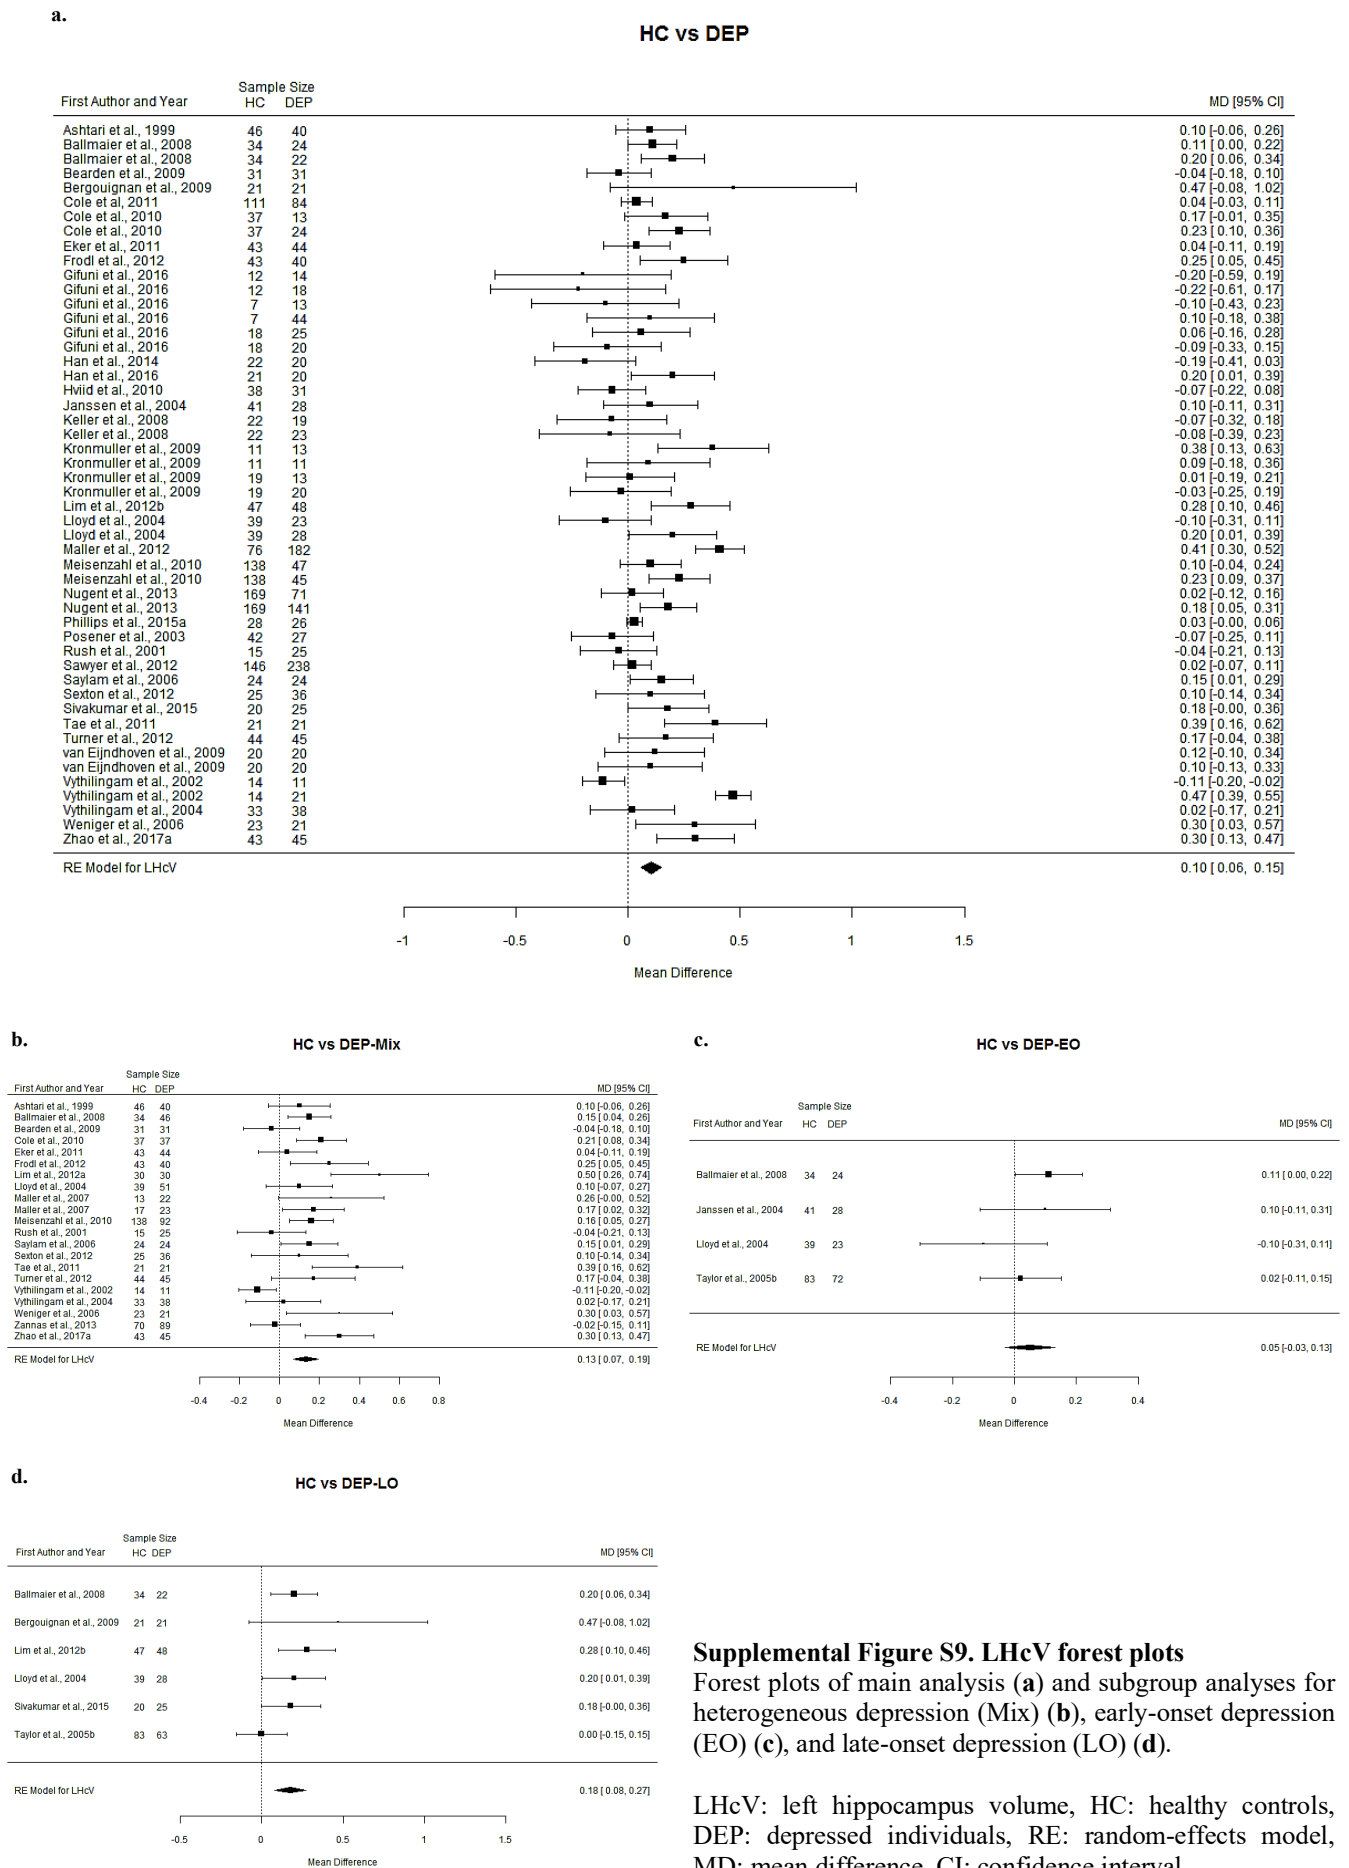

**Supplemental Figure S9. LHcV forest plots**  
Forest plots of main analysis (a) and subgroup analyses for heterogeneous depression (Mix) (b), early-onset depression (EO) (c), and late-onset depression (LO) (d).

LHcV: left hippocampus volume, HC: healthy controls, DEP: depressed individuals, RE: random-effects model, MD: mean difference, CI: confidence interval.

Online appendices are unedited and posted as supplied by the authors.

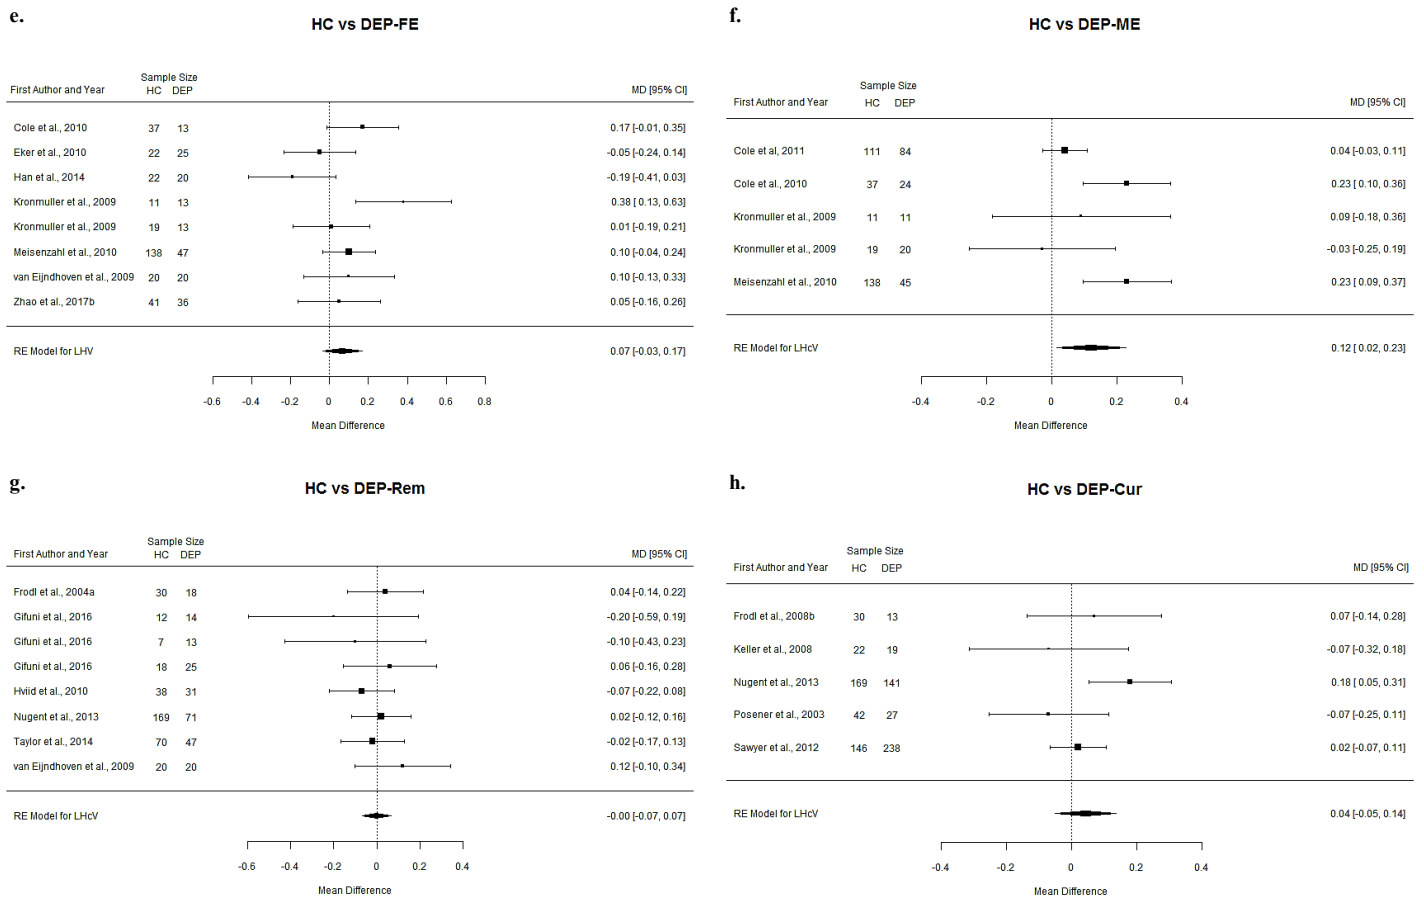

**Supplemental Figure S9. LHcV forest plots (continued)**

Forest plots of subgroup analyses for first-episode depression (FE) (e), multiple-episodes of depression (ME) (f), depression in remission (Rem) (g), and current depression (Cur) (h).

LHcV: left hippocampus volume, HC: healthy controls, DEP: depressed individuals, RE: random-effects model, MD: mean difference, CI: confidence interval.

Online appendices are unedited and posted as supplied by the authors.

**a.**

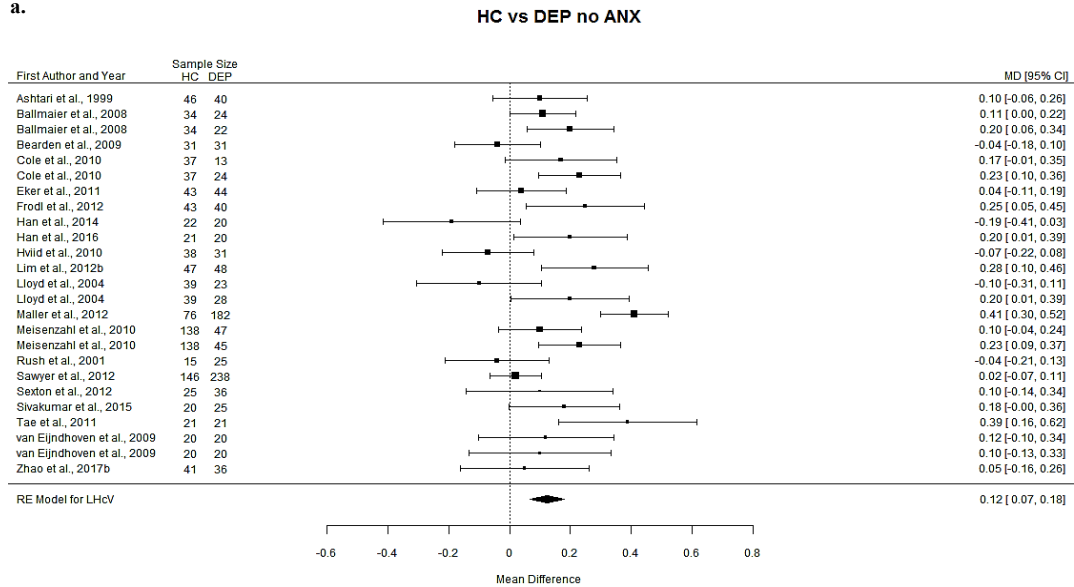

**b.**

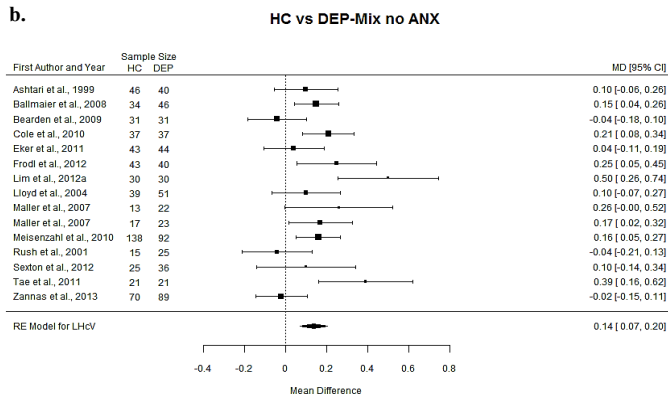

**c.**

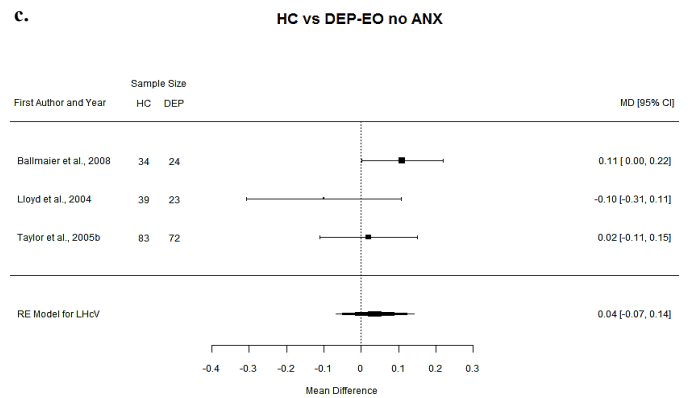

**d.**

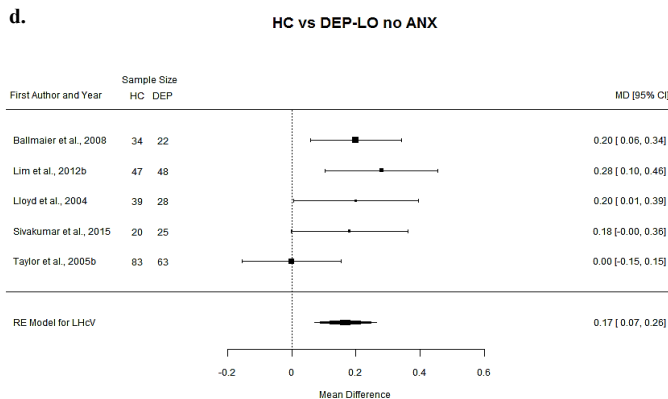

**e.**

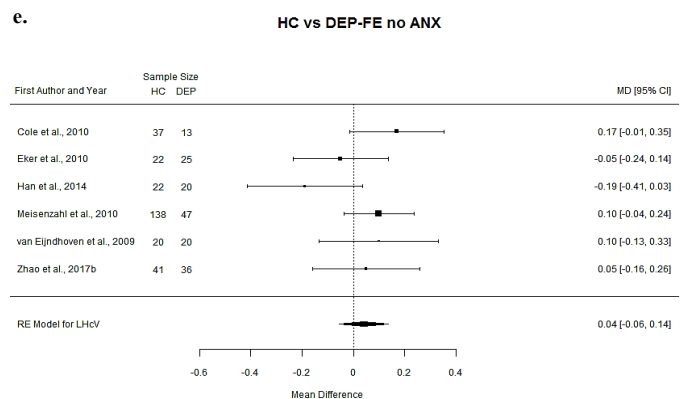

**f.**

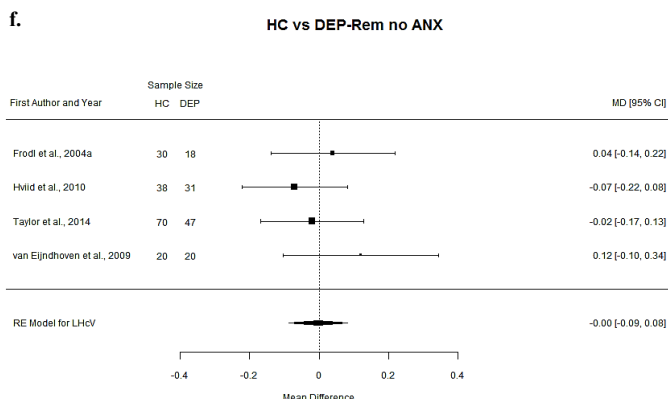

**Supplemental Figure S10. LHcV assessment of anxiety comorbidity forest plots**

Forest plots of main analysis (a) and subgroup analyses for heterogeneous depression (Mix) (b), early-onset depression (EO) (c), late-onset depression (LO) (d), first-episode of depression (FE) (e), and depression in remission (Rem) (f) excluding anxiety disorders (no ANX).

LHcV: left hippocampus volume, HC: healthy controls, DEP: depressed individuals, RE: random-effects model, MD: mean difference, CI: confidence interval.

Online appendices are unedited and posted as supplied by the authors.

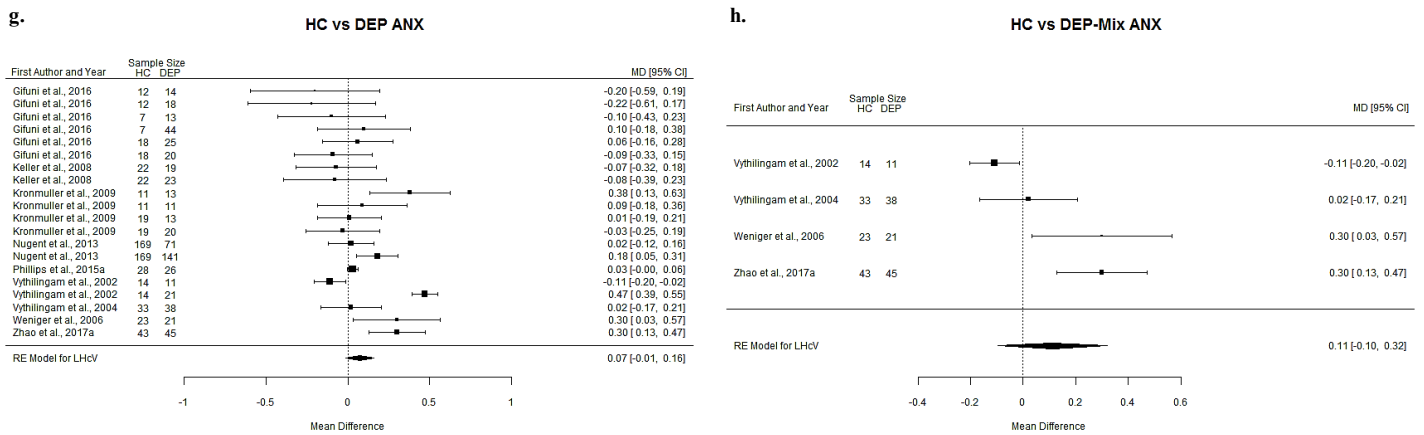

**Supplemental Figure S10. LHcV assessment of anxiety comorbidity forest plots (continued)**

Forest plots of main analysis (g), and subgroup analysis for heterogeneous depression (Mix) comorbid with anxiety disorders (ANX).

LHcV: left hippocampus volume, HC: healthy controls, DEP: depressed individuals, RE: random-effects model, MD: mean difference, CI: confidence interval.

Online appendices are unedited and posted as supplied by the authors.

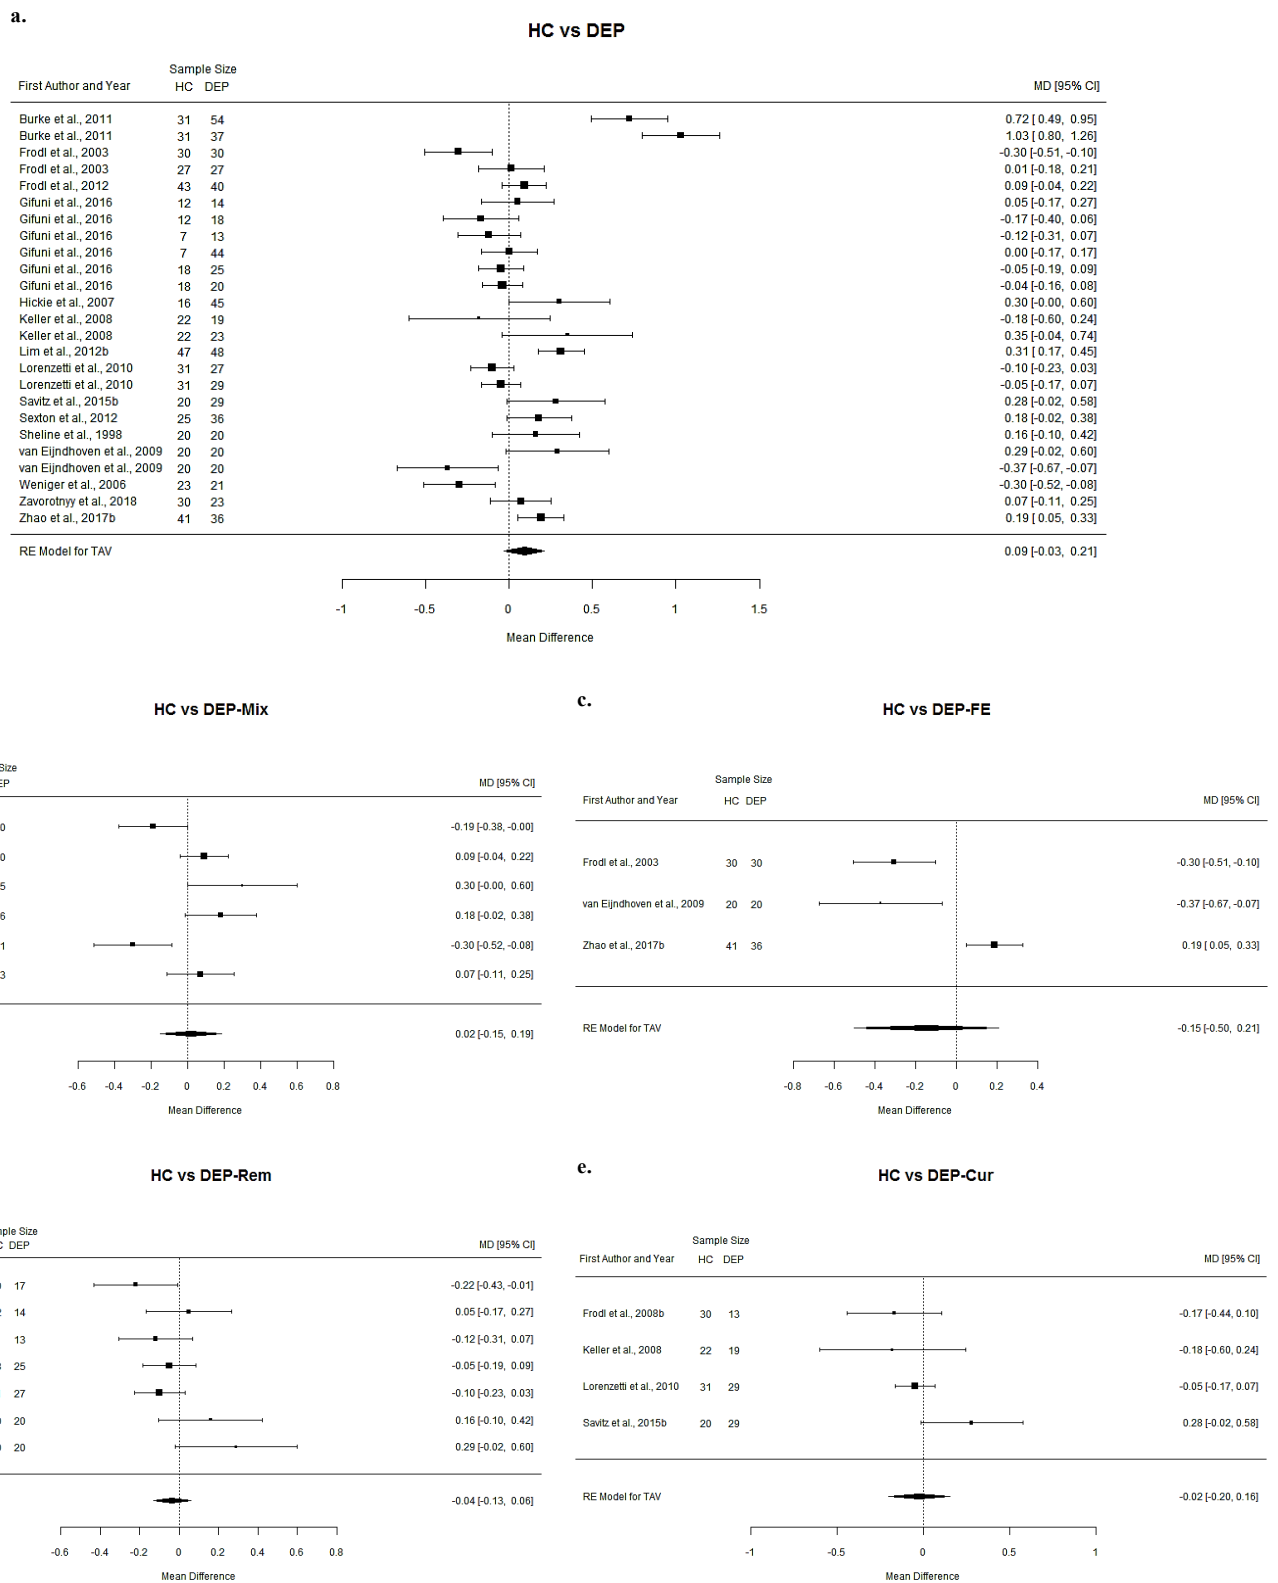

**Supplemental Figure S11. TAV forest plots**

Forest plots of main analysis (a) and subgroup analyses for heterogeneous depression (Mix) (b), first-episode of depression (FE) (c), depression in remission (Rem) (d), and current depression (Cur) (e).

TAV: total amygdala volume, HC: healthy controls, DEP: depressed individuals, RE: random-effects model, MD: mean difference, CI: confidence interval.

Online appendices are unedited and posted as supplied by the authors.

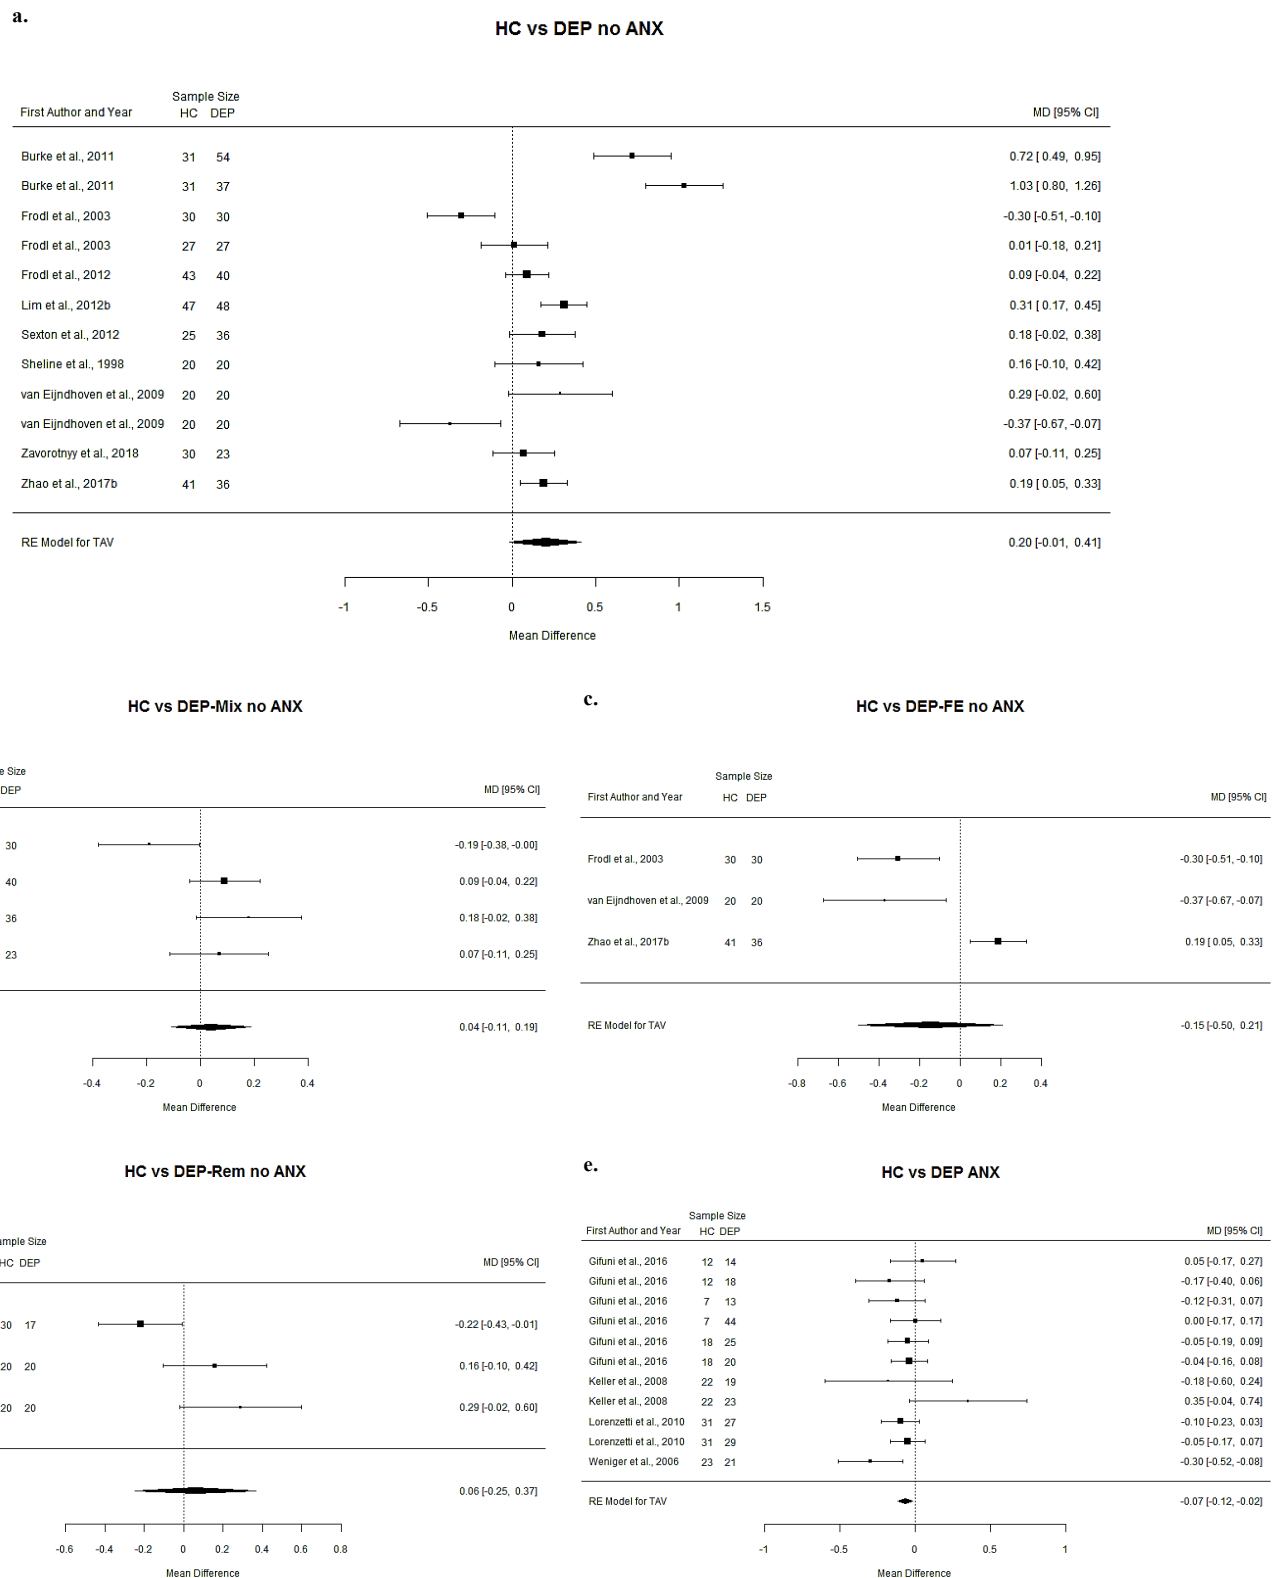

**Supplemental Figure S12. TAV assessment of anxiety comorbidity forest plots**

Forest plots of main analysis (a) and subgroup analyses for heterogeneous depression (Mix) (b), first-episode of depression (FE) (c), and depression in remission (Rem) (d) excluding anxiety disorders (no ANX). Forest plot of main analysis (e) comorbid with anxiety disorders (ANX).

TAV: total amygdala volume, HC: healthy controls, DEP: depressed individuals, RE: random-effects model, MD: mean difference, CI: confidence interval.

Online appendices are unedited and posted as supplied by the authors.

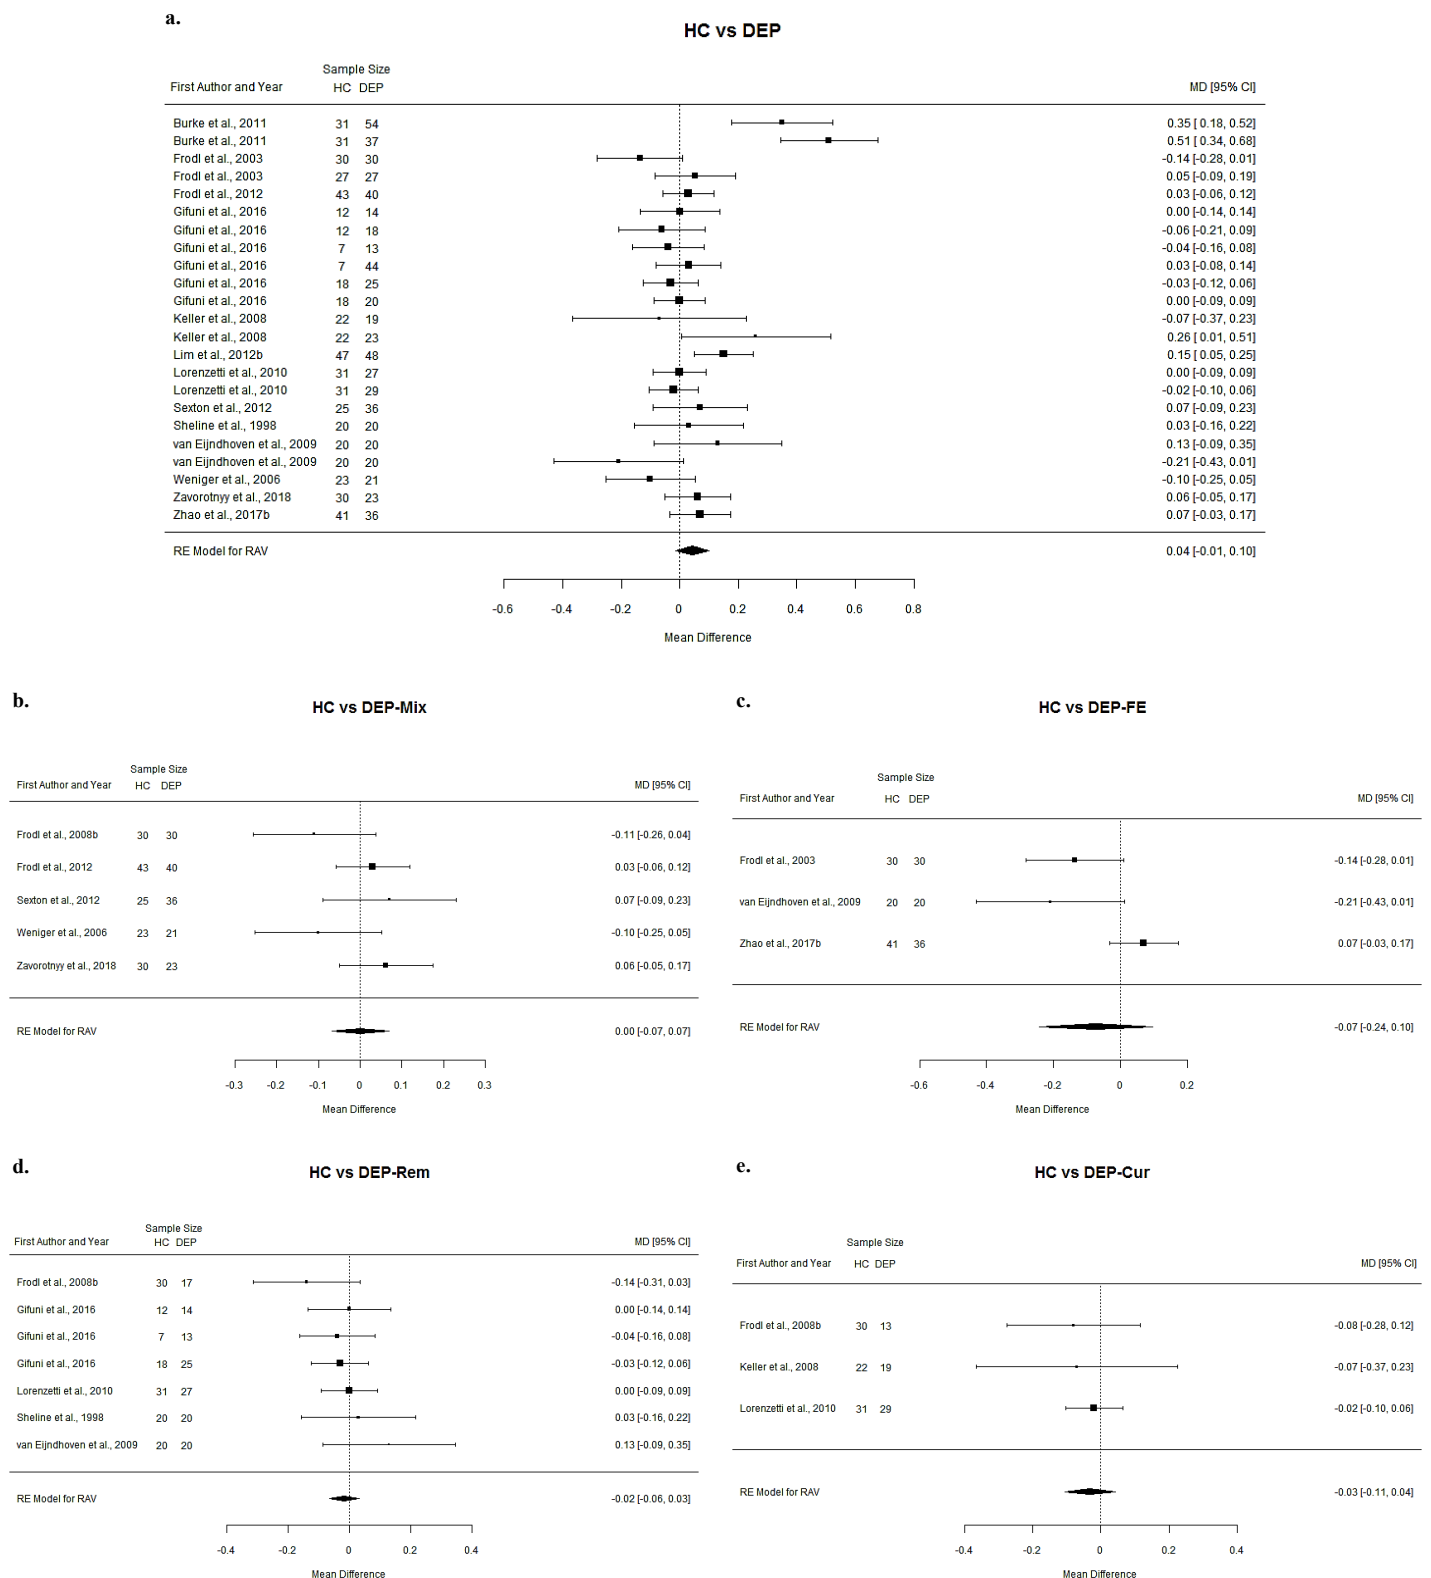

**Supplemental Figure S13. RAV forest plots**

Forest plots of main analysis (a) and subgroup analyses for heterogeneous depression (Mix) (b), first-episode of depression (FE) (c), depression in remission (Rem) (d), and current depression (Cur) (e).

RAV: right amygdala volume, HC: healthy controls, DEP: depressed individuals, RE: random-effects model, MD: mean difference, CI: confidence interval.



Online appendices are unedited and posted as supplied by the authors.

**a.**

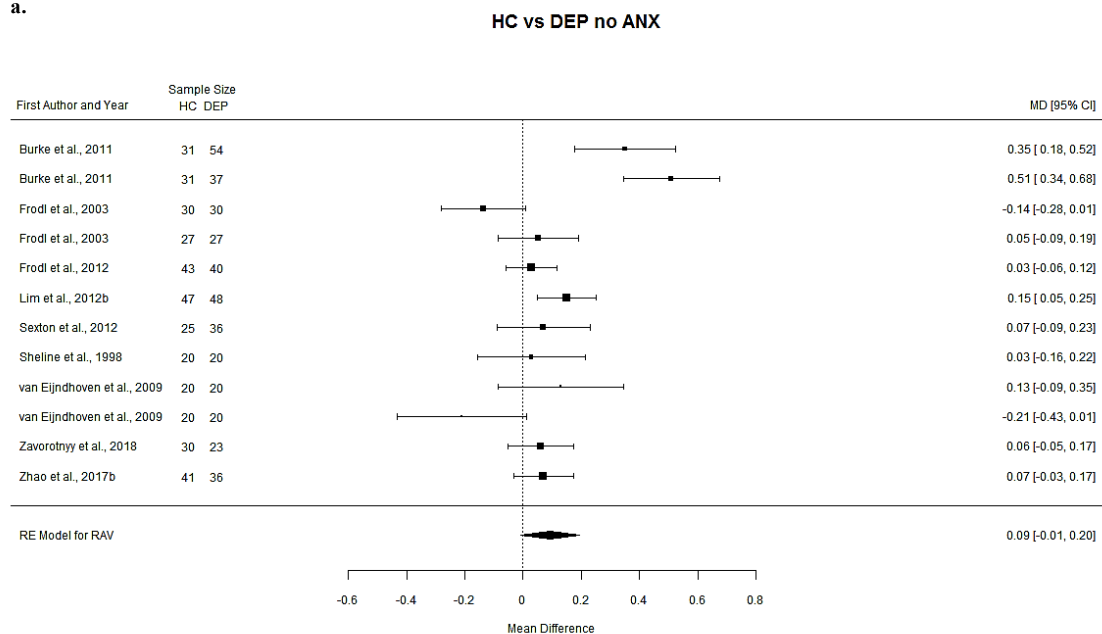

**b.**

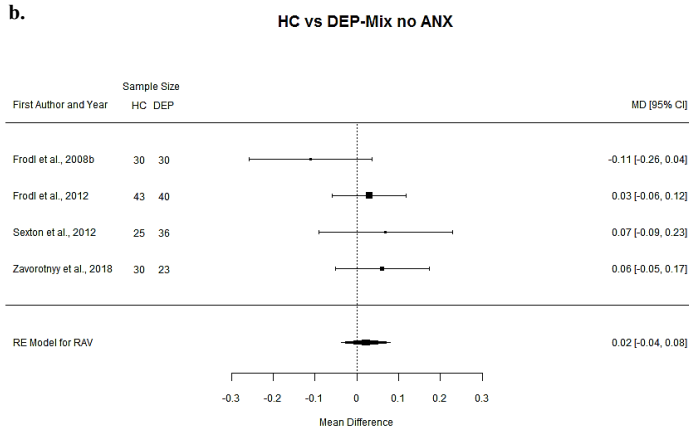

**c.**

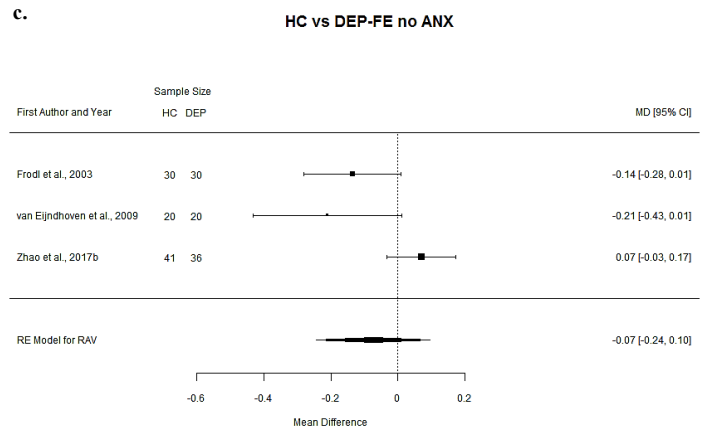

**d.**

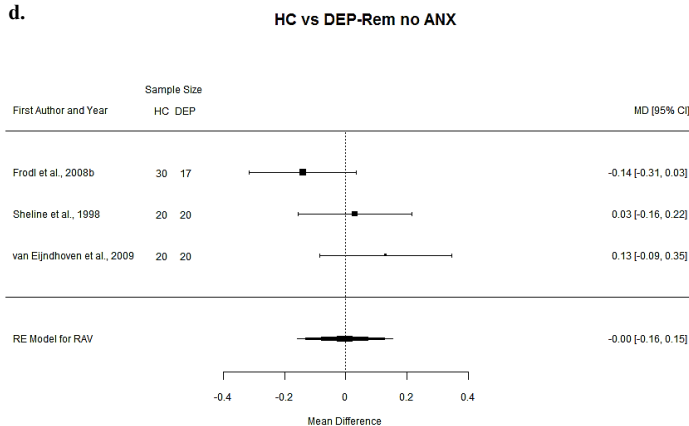

**e.**

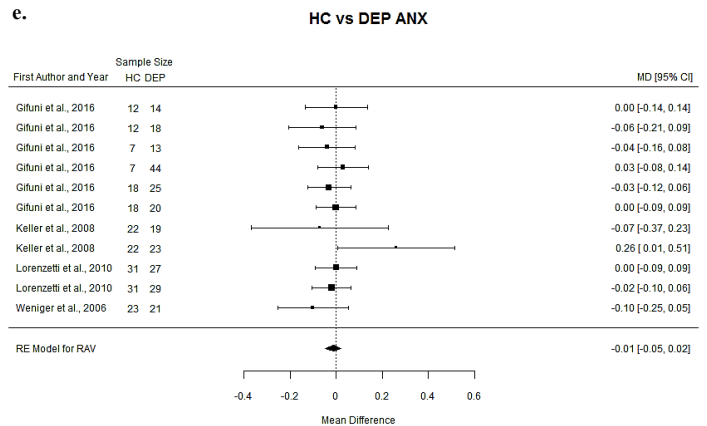

**Supplemental Figure S14. RAV assessment of anxiety comorbidity forest plots**

Forest plots of main analysis (a) and subgroup analyses for heterogeneous depression (Mix) (b), first-episode depression (FE) (c), and depression in remission (Rem) (d) excluding anxiety disorders (no ANX). Forest plot of main analysis (e) comorbid with anxiety disorders (ANX).

RAV: right amygdala volume, HC: healthy controls, DEP: depressed individuals, RE: random-effects model, MD: mean difference, CI: confidence interval.

Online appendices are unedited and posted as supplied by the authors.

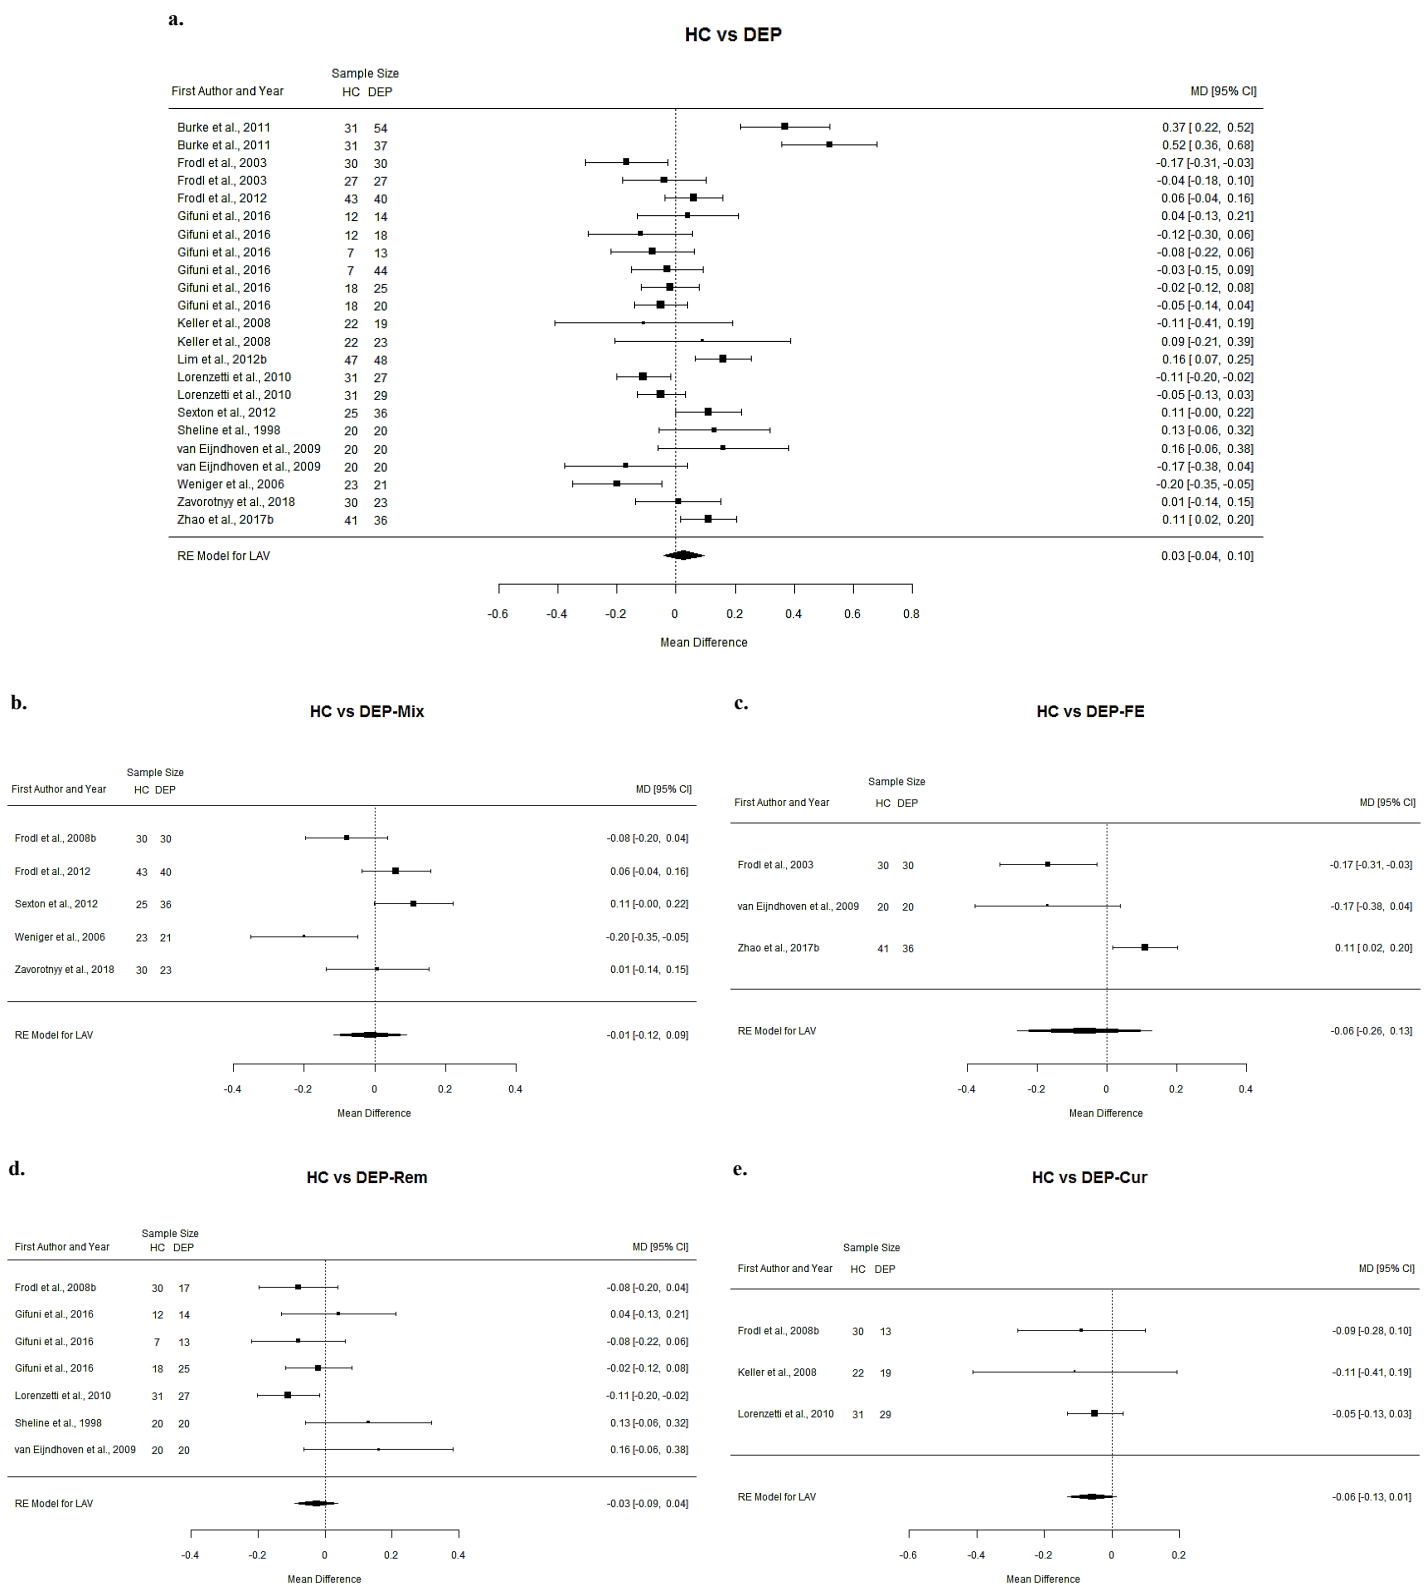

**Supplemental Figure S15. LAV forest plots**

Forest plots of main analysis (a) and subgroup analyses for heterogeneous depression (Mix) (b), first-episode depression (FE) (c), depression in remission (Rem) (d), and current depression (Cur) (e).

LAV: left amygdala volume, HC: healthy controls, DEP: depressed individuals, RE: random-effects model, MD: mean difference, CI: confidence interval.

Online appendices are unedited and posted as supplied by the authors.

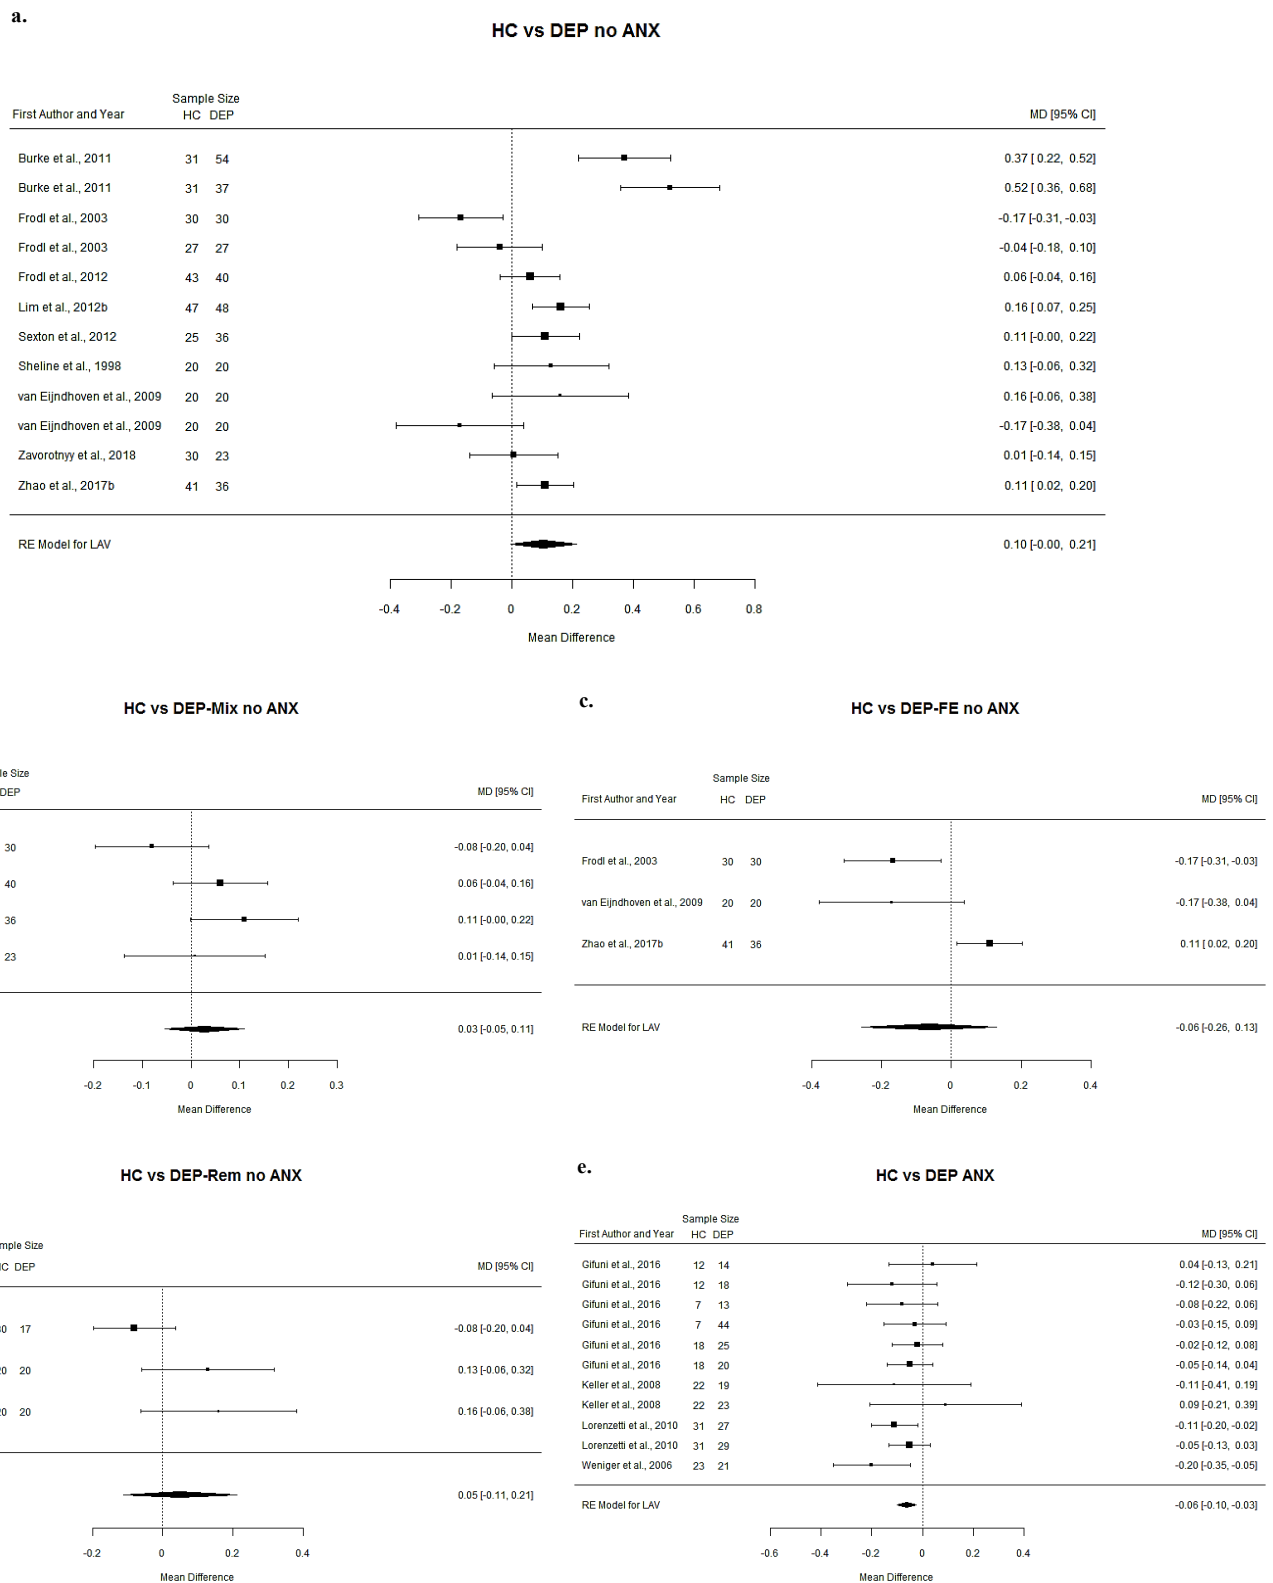

**Supplemental Figure S16. LAV assessment of anxiety comorbidity forest plots**

Forest plots of main analysis (a) and subgroup analyses for heterogeneous depression (Mix) (b), first-episode depression (FE) (c), and depression in remission (Rem) (d) excluding anxiety disorders (no ANX). Forest plot of main analysis (e) comorbid with anxiety disorders (ANX).

LAV: left amygdala volume, HC: healthy controls, DEP: depressed individuals, RE: random-effects model, MD: mean difference, CI: confidence interval.

Online appendices are unedited and posted as supplied by the authors.

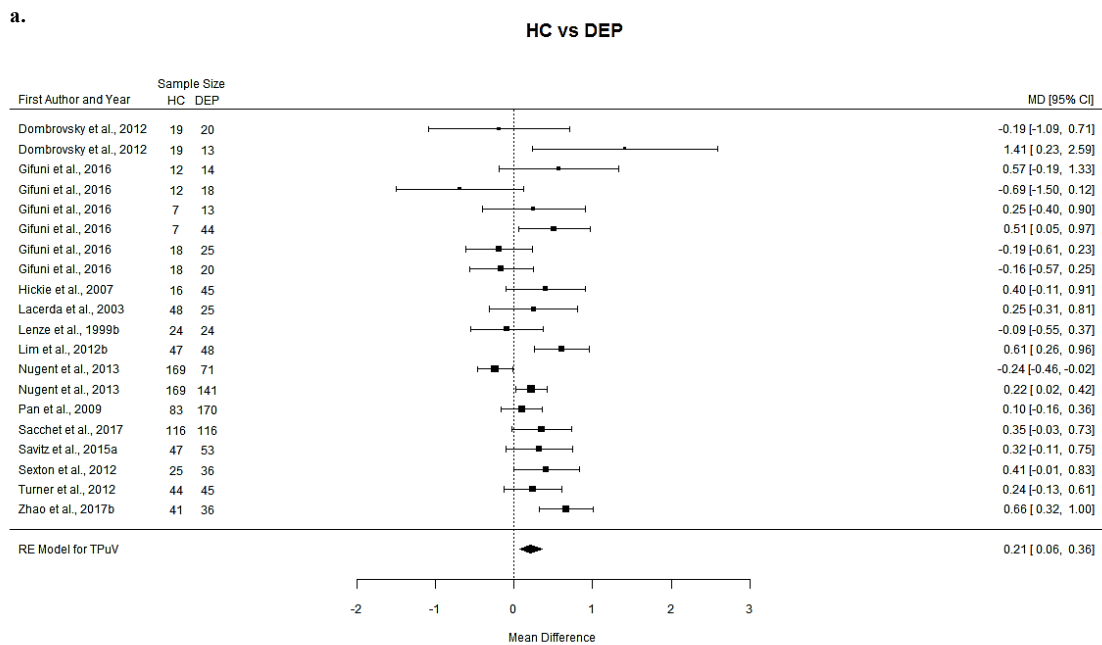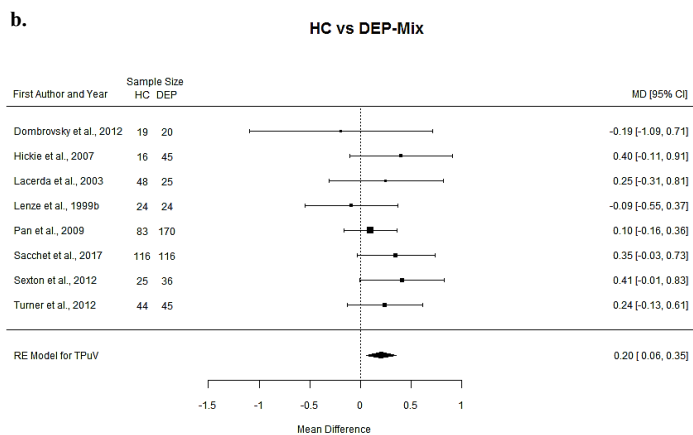

**Supplemental Figure S17. TPuV forest plots**

Forest plots of main analysis (a), and subgroup analysis for heterogeneous depression (Mix) (b).

TPuV: total putamen volume, HC: healthy controls, DEP: depressed individuals, RE: random-effects model, MD: mean difference, CI: confidence interval.

Online appendices are unedited and posted as supplied by the authors.

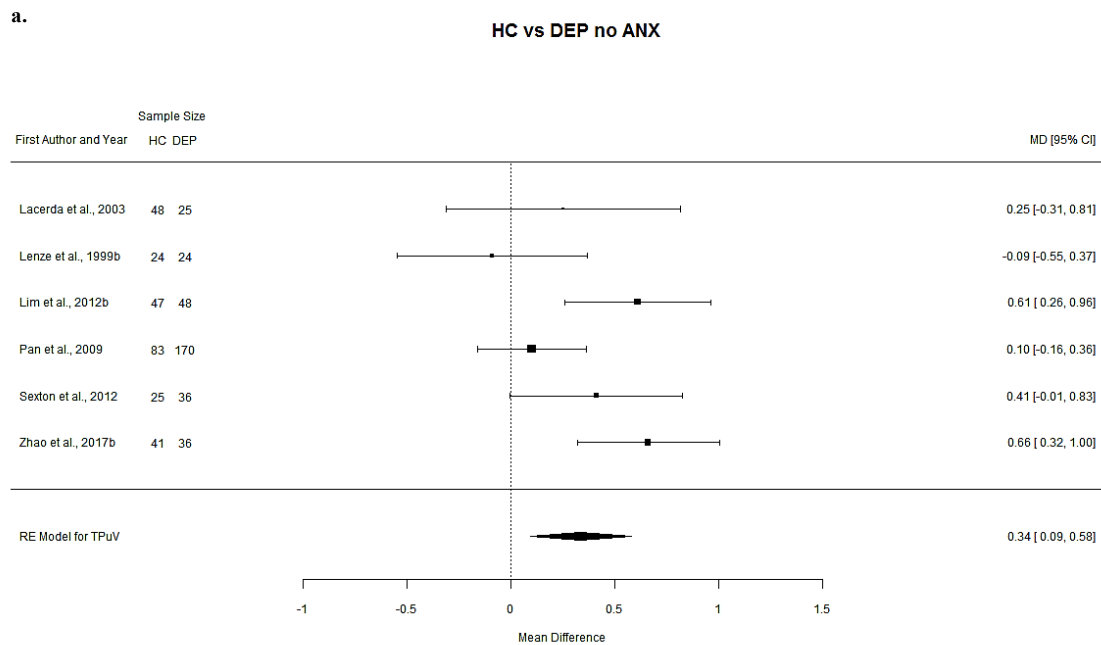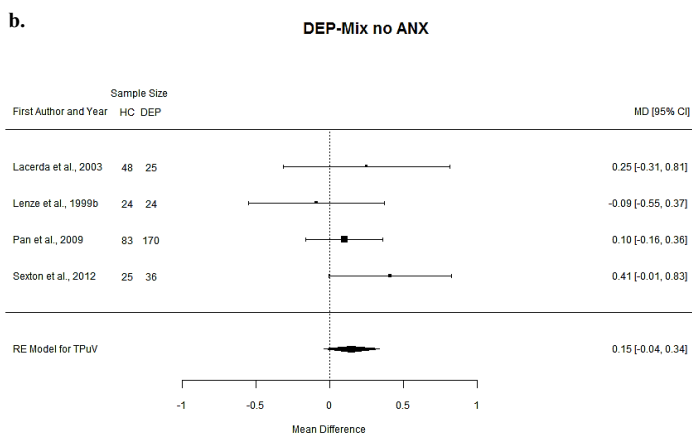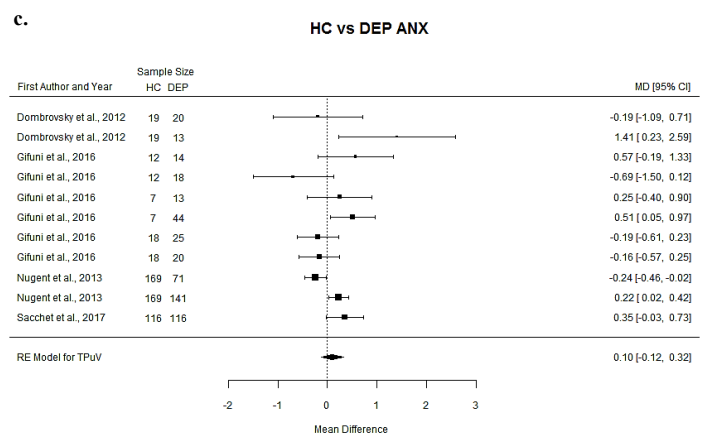

**Supplemental Figure S18. TPuV assessment of anxiety comorbidity forest plots**

Forest plots of main analysis (a), and subgroup analysis for heterogeneous depression (Mix) (b) excluding anxiety disorders (no ANX). Forest plot of main analysis (c) comorbid with anxiety disorders ANX).

TPuV: total putamen volume, HC: healthy controls, DEP: depressed individuals, RE: random-effects model, MD: mean difference, CI: confidence interval.

Online appendices are unedited and posted as supplied by the authors.

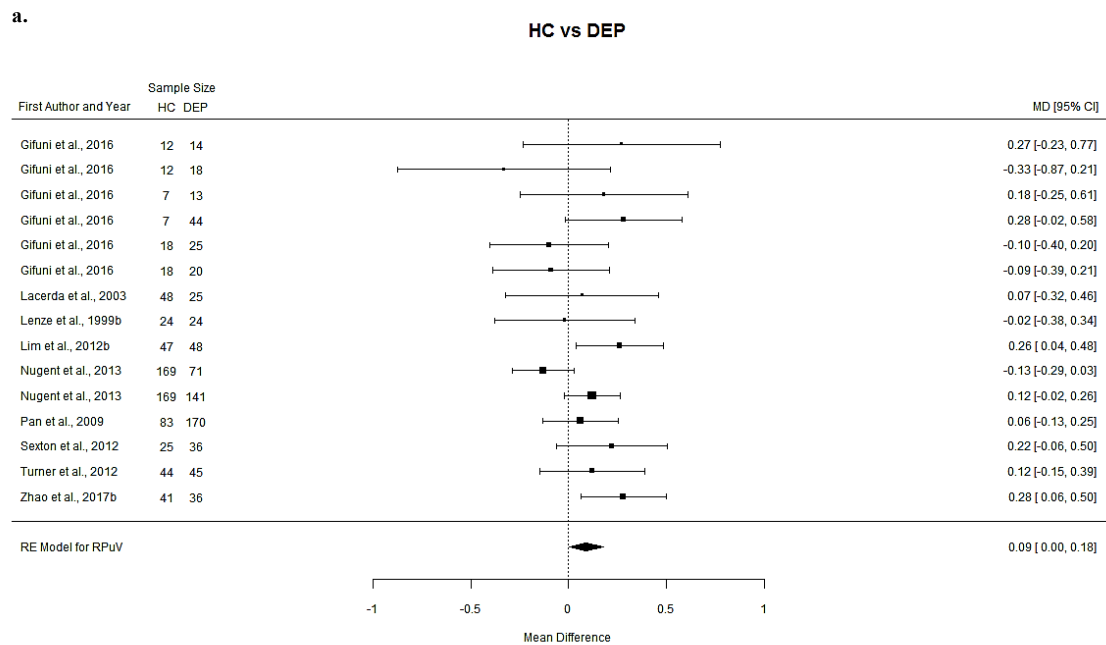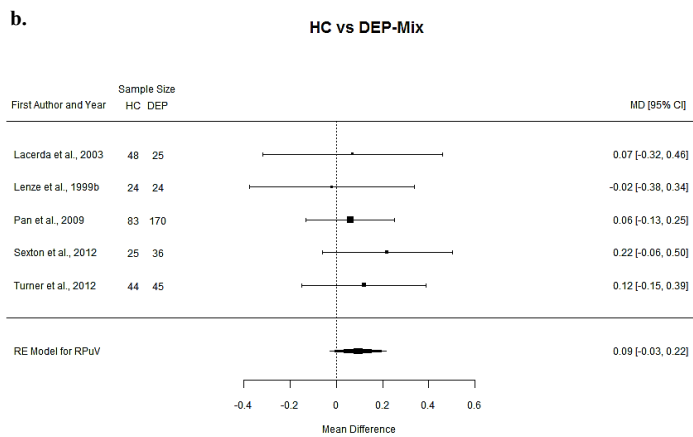

**Supplemental Figure S19. RPuV forest plots**

Forest plots of main analysis (a), and subgroup analysis for heterogeneous depression (Mix) (b).

RPuV: right putamen volume, HC: healthy controls, DEP: depressed individuals, RE: random-effects model, MD: mean difference, CI: confidence interval.

Online appendices are unedited and posted as supplied by the authors.

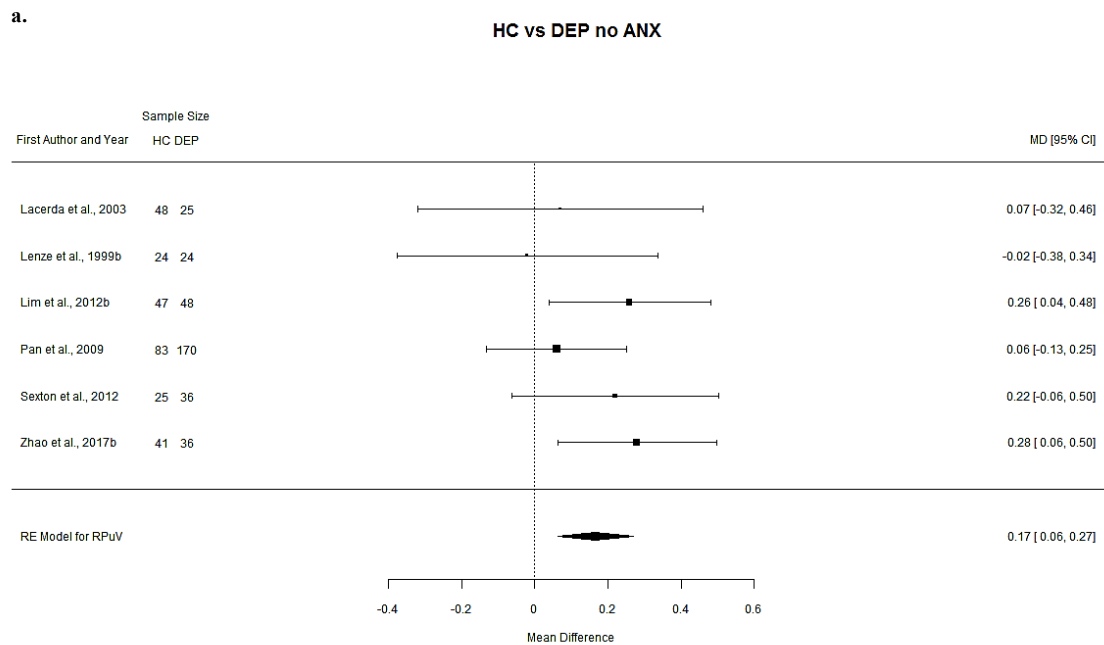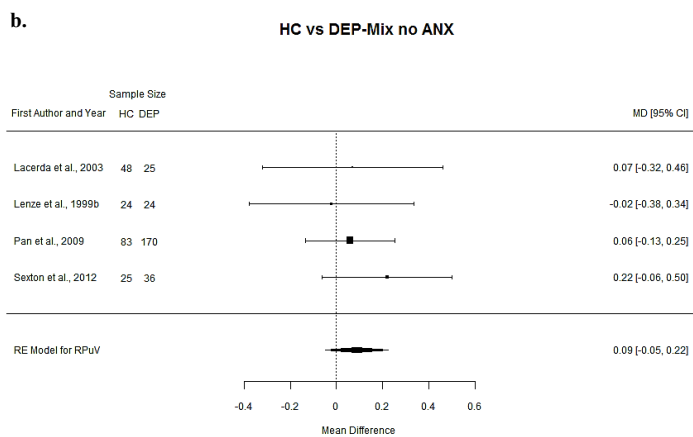

**Supplemental Figure S20. RPuV assessment of anxiety comorbidity forest plots**

Forest plots of main analysis (a), and subgroup analysis for heterogeneous depression (Mix) (b) excluding anxiety disorders (no ANX).

RPuv: right putamen volume, HC: healthy controls, DEP: depressed individuals, RE: random-effects model, MD: mean difference, CI: confidence interval.

Online appendices are unedited and posted as supplied by the authors.

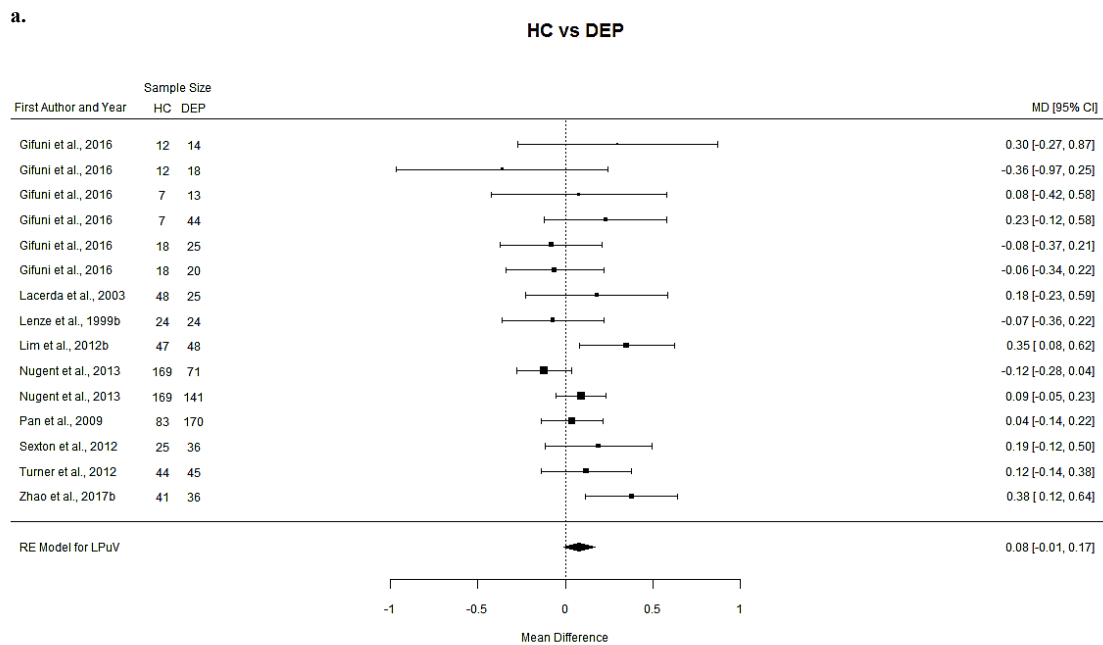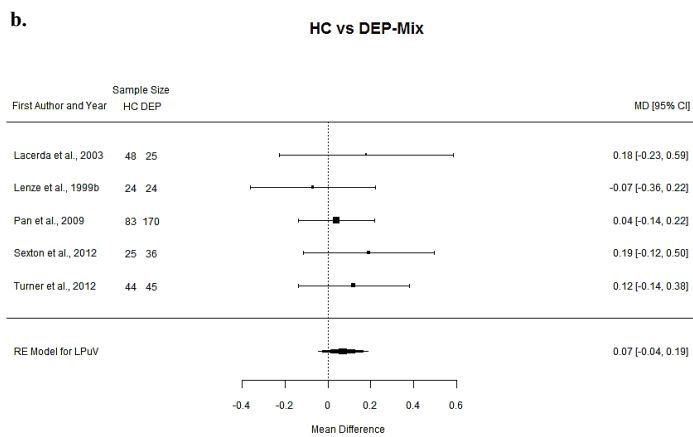

**Supplemental Figure S21. LPuV forest plots**

Forest plots of main analysis (a), and subgroup analysis for heterogeneous depression (Mix) (b).

LPuV: left putamen volume, HC: healthy controls, DEP: depressed individuals, RE: random-effects model, MD: mean difference, CI: confidence interval.



Online appendices are unedited and posted as supplied by the authors.

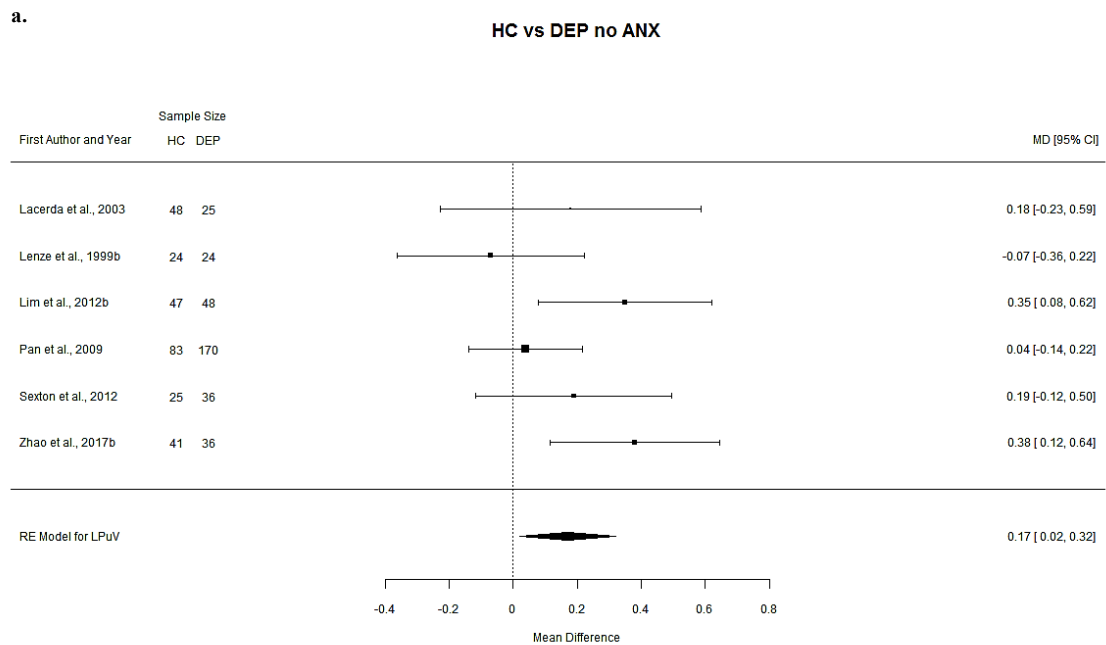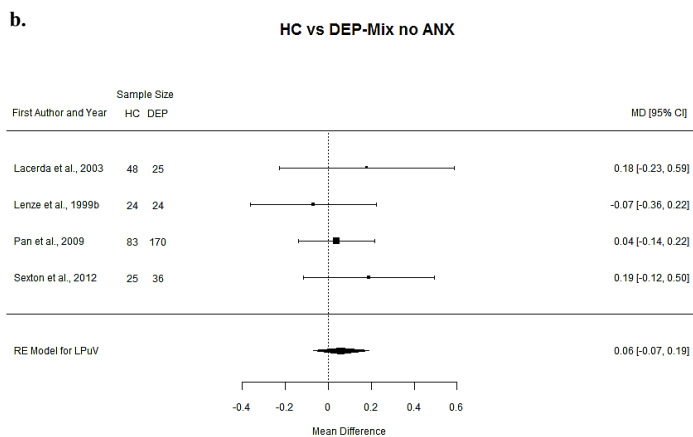

**Supplemental Figure S22. LPuV assessment of anxiety comorbidity forest plots**

Forest plots of main analysis (a), and subgroup analysis for heterogeneous depression (Mix) (b) excluding anxiety disorders (no ANX).

LPuV: left putamen volume, HC: healthy controls, DEP: depressed individuals, RE: random-effects model, MD: mean difference, CI: confidence interval.

Online appendices are unedited and posted as supplied by the authors.

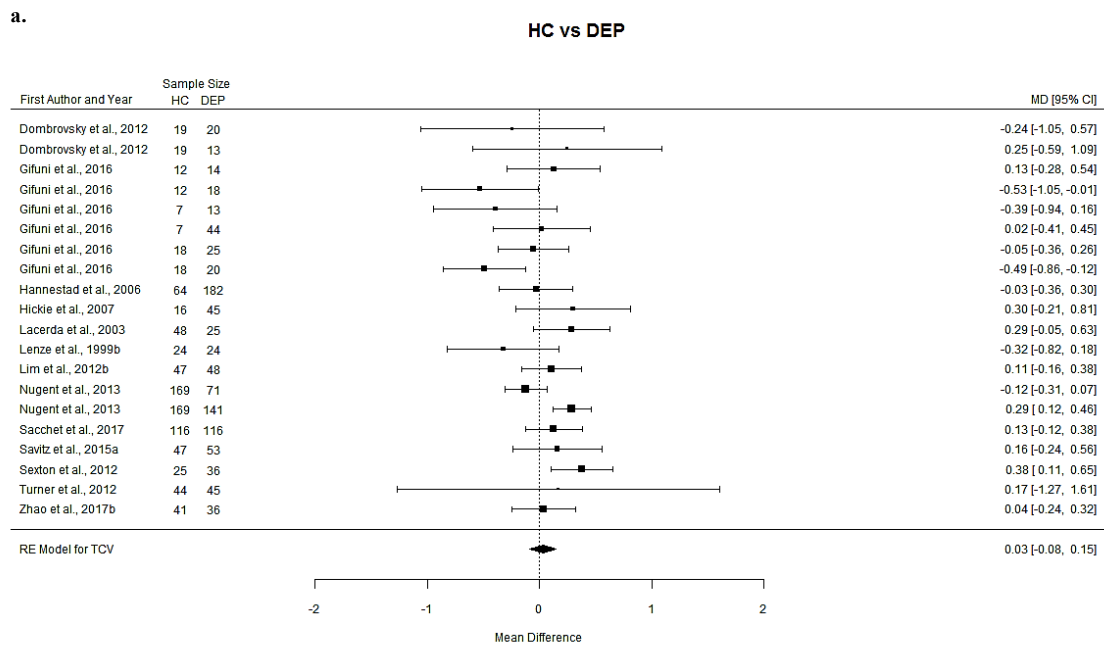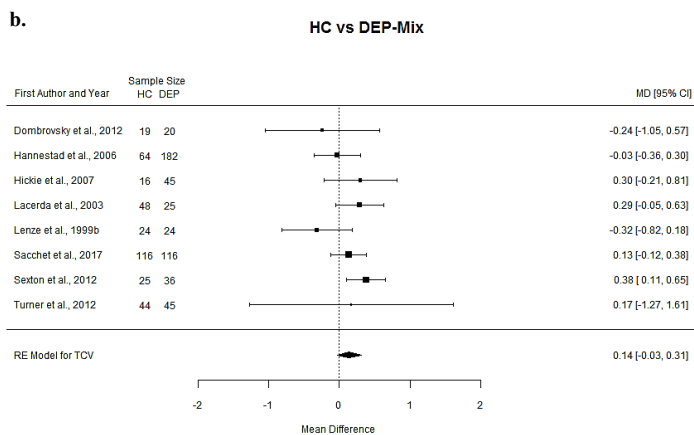

**Supplemental Figure S23. TCV forest plots**

Forest plots of main analysis (a), and subgroup analysis for heterogeneous depression (Mix) (b).

TCV: total caudate volume, HC: healthy controls, DEP: depressed individuals, RE: random-effects model, MD: mean difference, CI: confidence interval.

Online appendices are unedited and posted as supplied by the authors.

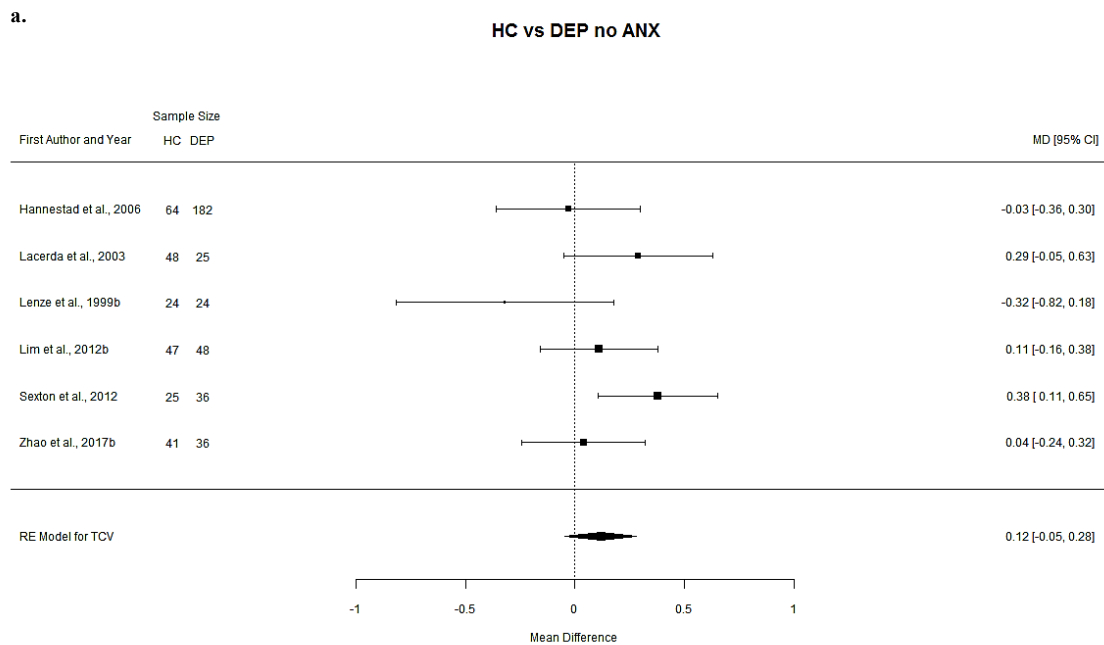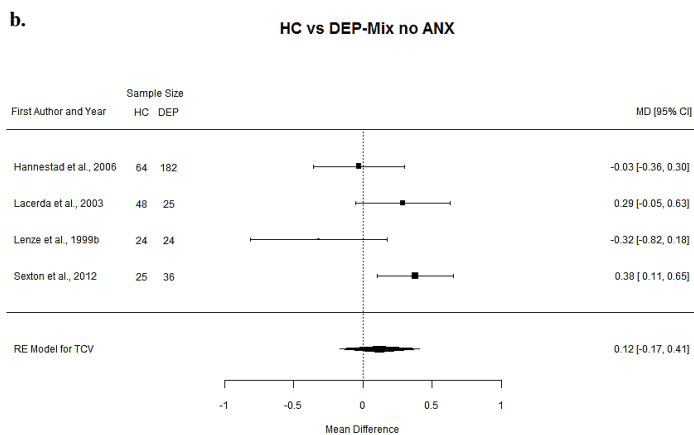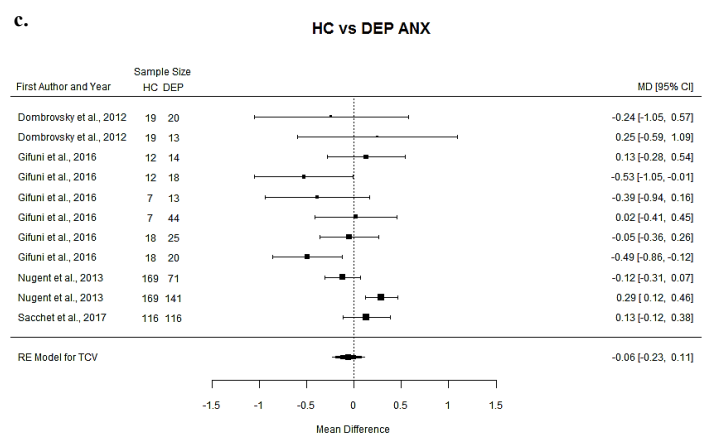

**Supplemental Figure S24. TCV assessment of anxiety comorbidity forest plots**

Forest plots of main analysis (a), and subgroup analysis for heterogeneous depression (Mix) (b) excluding anxiety disorders (no ANX). Forest plot of main analysis (c) comorbid with anxiety disorders (ANX).

TCV: total caudate volume, HC: healthy controls, DEP: depressed individuals, RE: random-effects model, MD: mean difference, CI: confidence interval.

Online appendices are unedited and posted as supplied by the authors.

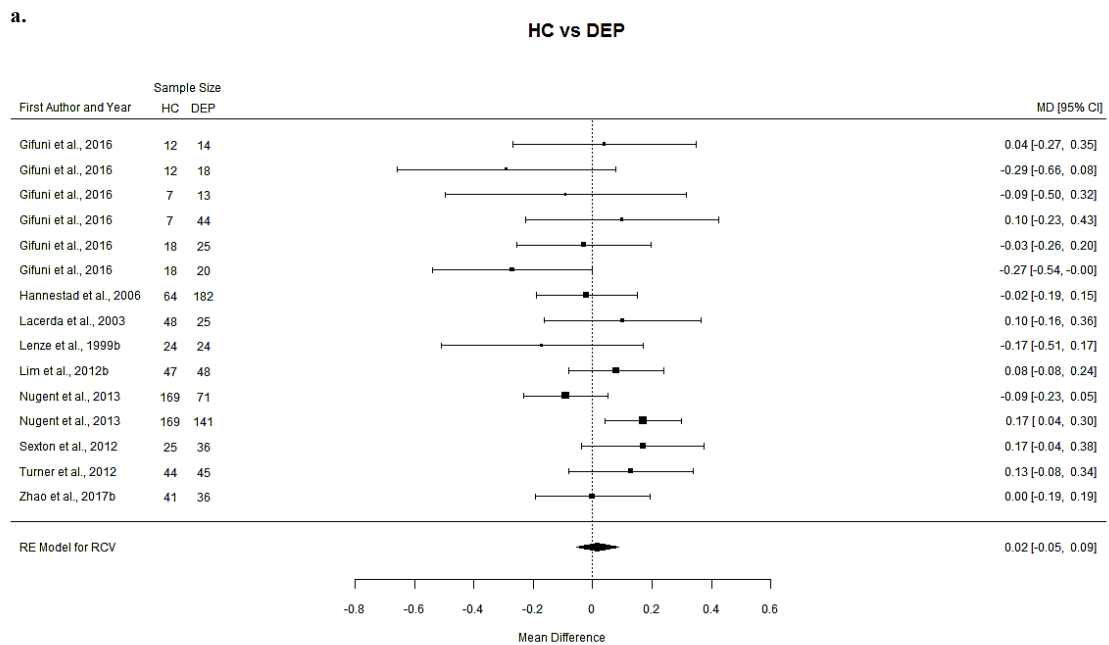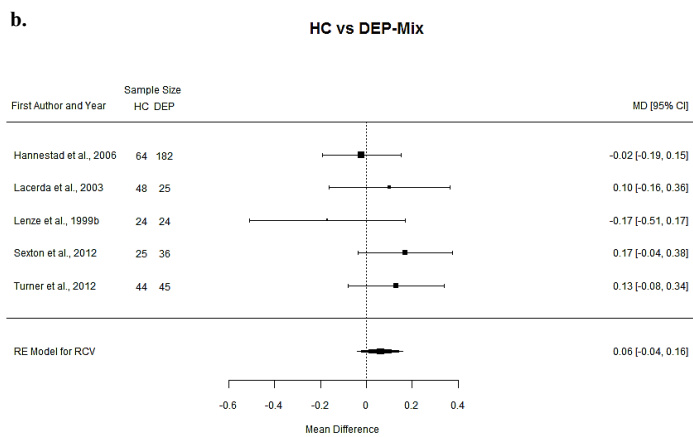

**Supplemental Figure S25. RCV forest plots**

Forest plots of main analysis (a), and subgroup analysis for heterogeneous depression (Mix) (b).

RCV: right caudate volume, HC: healthy controls, DEP: depressed individuals, RE: random-effects model, MD: mean difference, CI: confidence interval.

Online appendices are unedited and posted as supplied by the authors.

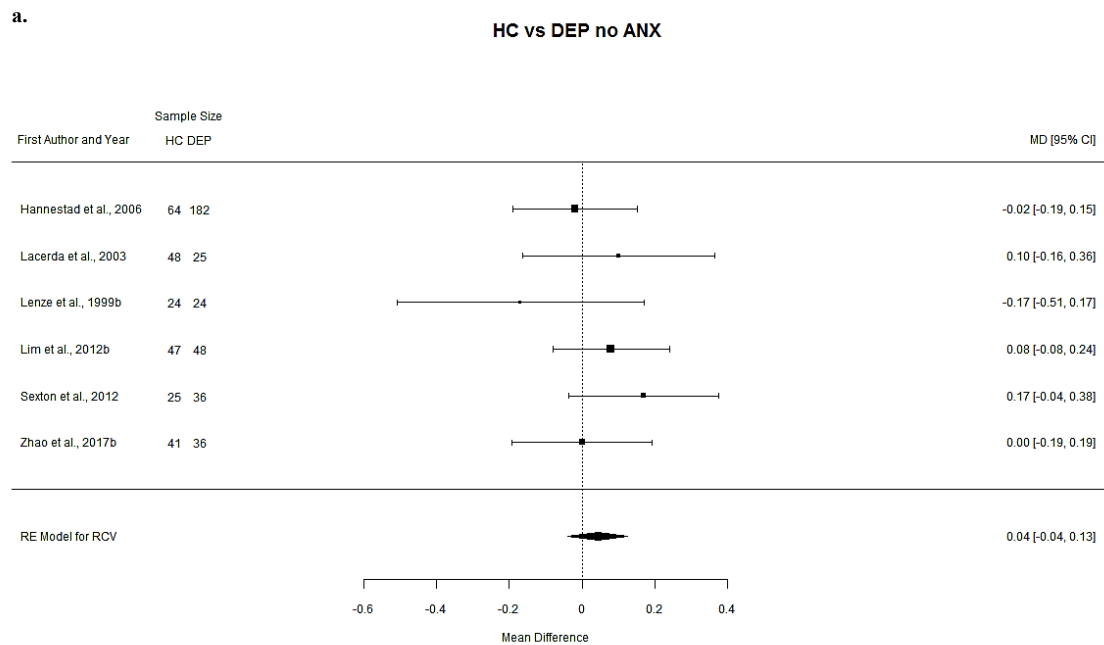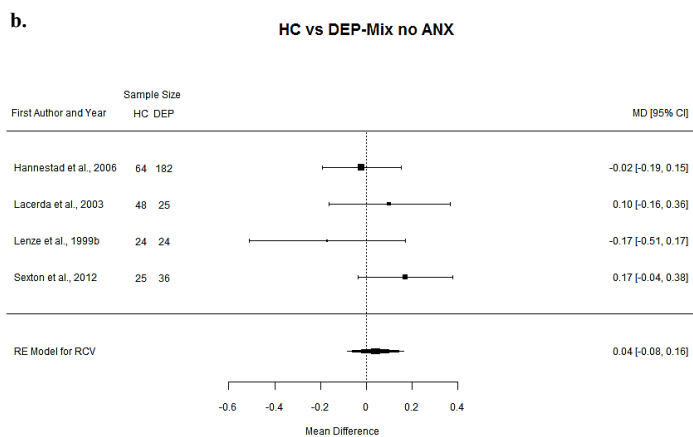

**Supplemental Figure S26. RCV assessment of anxiety comorbidity forest plots**

Forest plots of main analysis (a), and subgroup analysis for heterogeneous depression (Mix) (b) excluding anxiety disorders (no ANX).

RCV: right caudate volume, HC: healthy controls, DEP: depressed individuals, RE: random-effects model, MD: mean difference, CI: confidence interval.

Online appendices are unedited and posted as supplied by the authors.

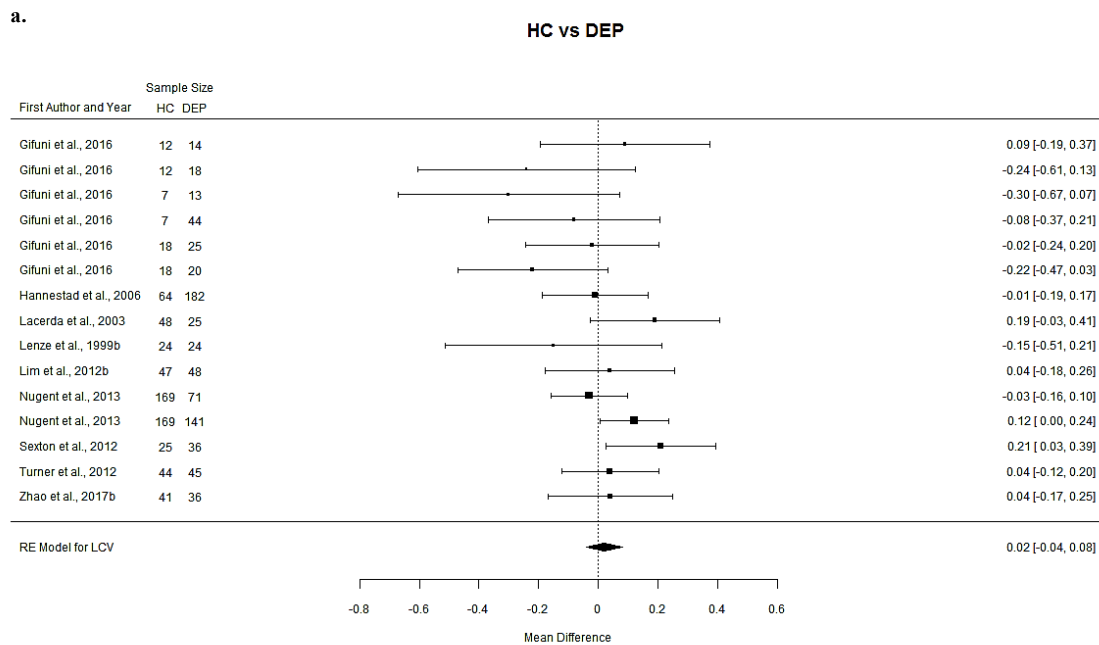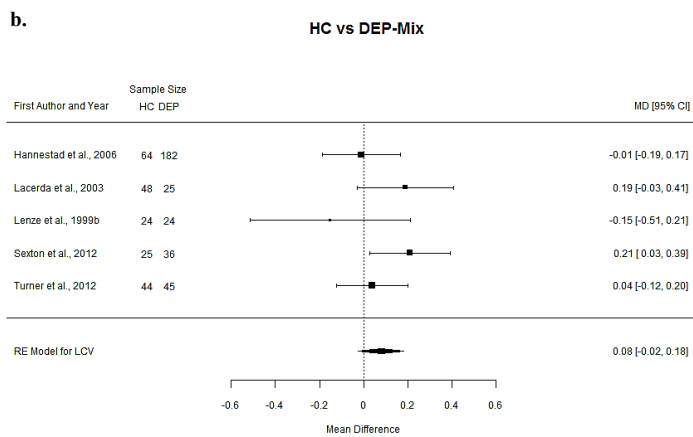

**Supplemental Figure S27. LCV forest plots**

Forest plots of main analysis (a), and subgroup analysis for heterogeneous depression (Mix) (b).

LCV: left caudate volume, HC: healthy controls, DEP: depressed individuals, RE: random-effects model, MD: mean difference, CI: confidence interval.

Online appendices are unedited and posted as supplied by the authors.

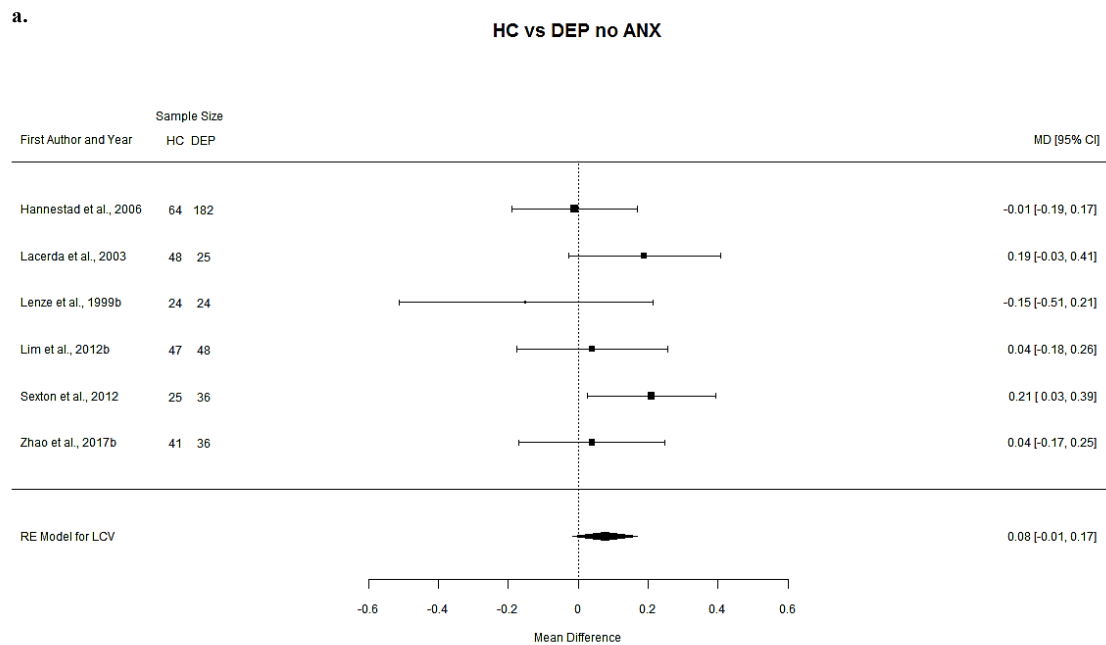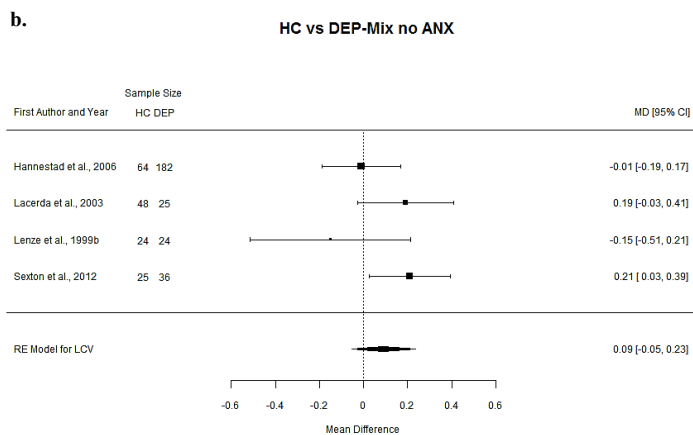

**Supplemental Figure S28. LCV assessment of anxiety comorbidity forest plots**

Forest plots of main analysis (a), and subgroup analysis for heterogeneous depression (Mix) (b) excluding anxiety disorders (no ANX).

LCV: left caudate volume, HC: healthy controls, DEP: depressed individuals, RE: random-effects model, MD: mean difference, CI: confidence interval.

Online appendices are unedited and posted as supplied by the authors.

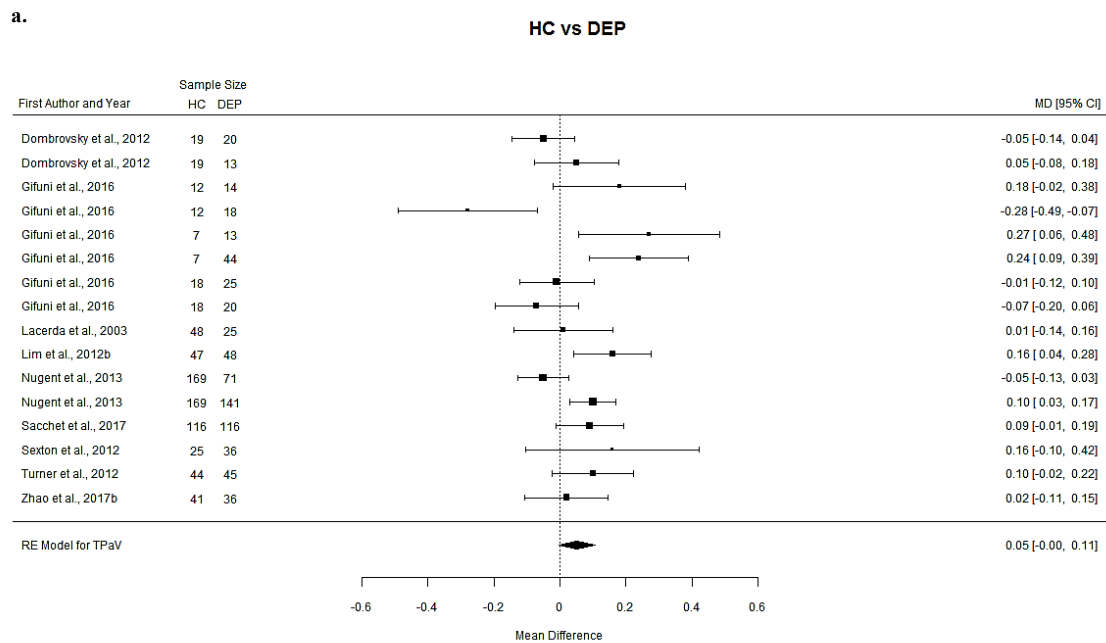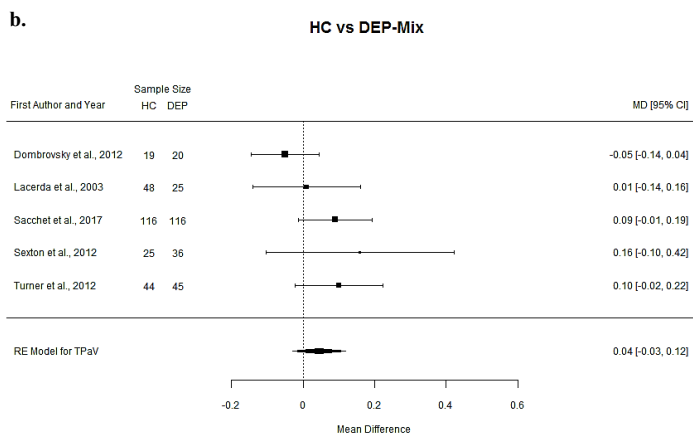

**Supplemental Figure S29. TPaV forest plots**

Forest plots of main analysis (a), and subgroup analysis for heterogeneous depression (Mix) (b).

TPaV: total pallidum volume, HC: healthy controls, DEP: depressed individuals, RE: random-effects model, MD: mean difference, CI: confidence interval.



Online appendices are unedited and posted as supplied by the authors.

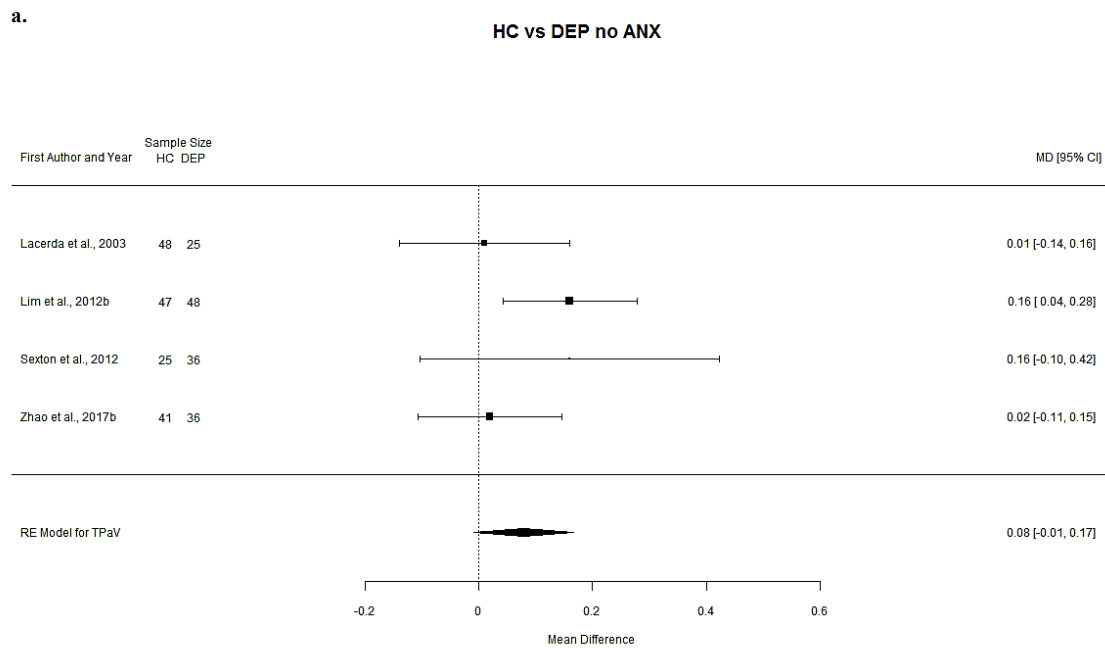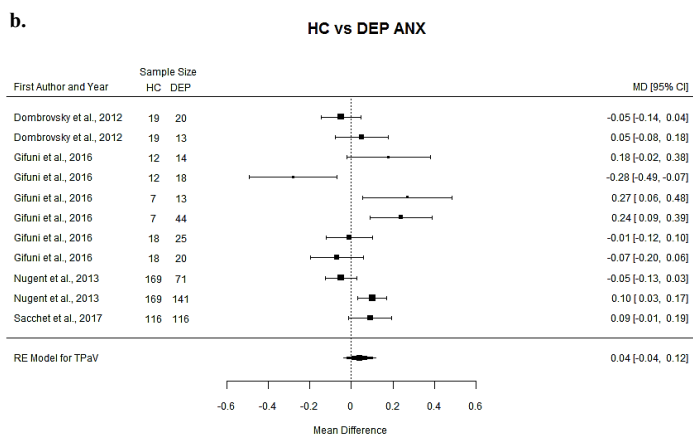

**Supplemental Figure S30. TPaV assessment of anxiety comorbidity forest plots**

Forest plot of main analysis (a) excluding anxiety disorders (no ANX). Forest plot of main analysis (b) comorbid with anxiety disorders (ANX).

TPaV: total pallidum volume, HC: healthy controls, DEP: depressed individuals RE: random-effects model, MD: mean difference, CI: confidence interval.

Online appendices are unedited and posted as supplied by the authors.

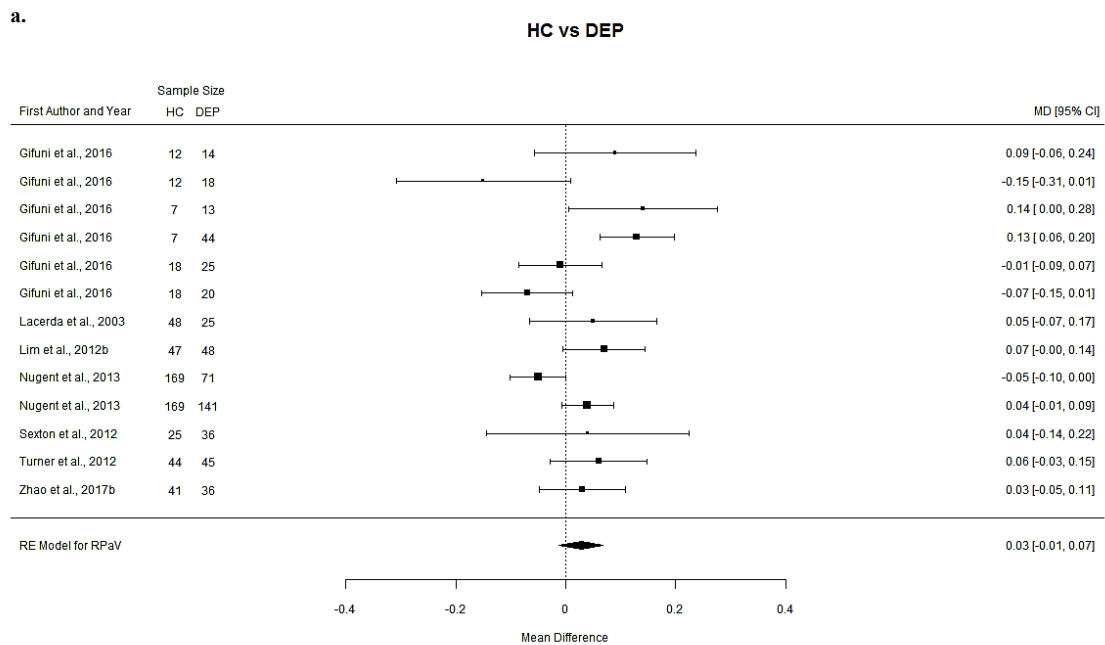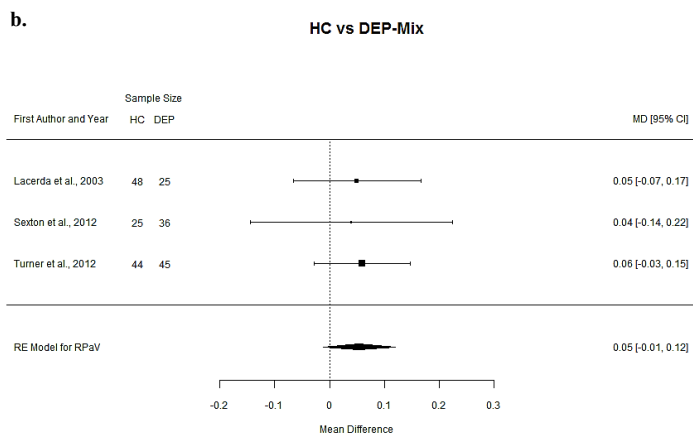

**Supplemental Figure S31. RPaV forest plots**

Forest plots of main analysis (a), and subgroup analysis for heterogeneous depression (Mix) (b).

RPaV: right pallidum volume, HC: healthy controls, DEP: depressed individuals, RE: random-effects model, MD: mean difference, CI: confidence interval.

**Appendix 1** to Espinoza Oyarce DA, Shaw ME, Alateeq K, et al. Volumetric brain differences in clinical depression in association with anxiety: a systematic review with meta-analysis. *J Psychiatry Neurosci* 2020.

DOI: 10.1503/jpn.190156

Online appendices are unedited and posted as supplied by the authors.

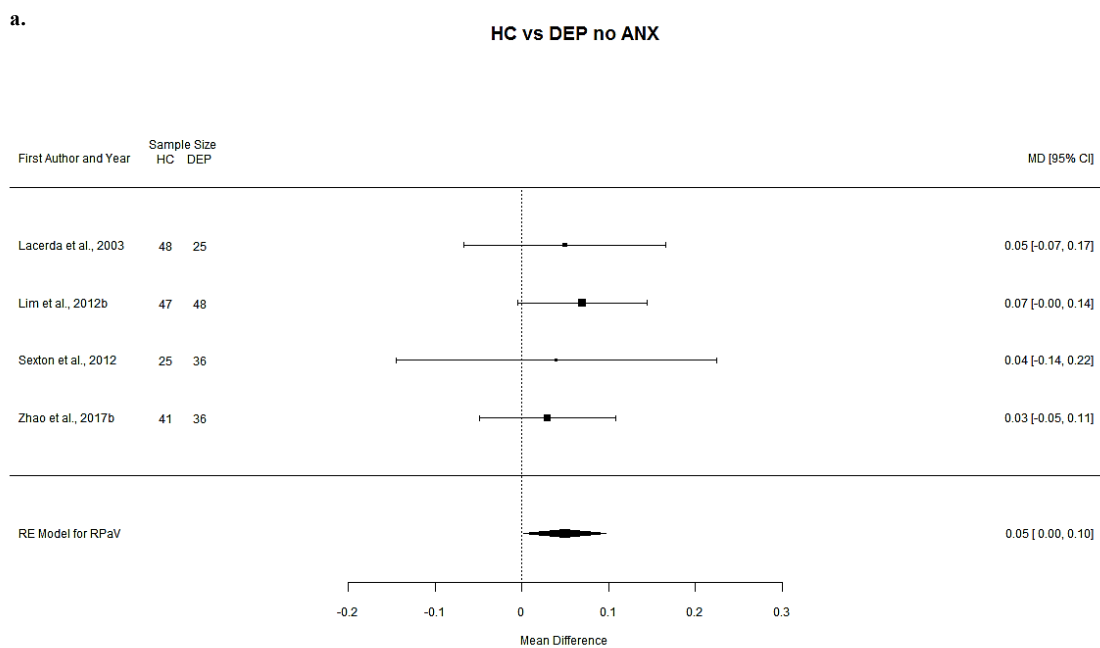

**Supplemental Figure S32. RPaV assessment of anxiety comorbidity forest plot**

Forest plot of main analysis (a) excluding anxiety disorders (no ANX).

RPaV: right pallidum volume, HC: healthy controls, DEP: depressed individuals, RE: random-effects model, MD: mean difference, CI: confidence interval.

**Appendix 1** to Espinoza Oyarce DA, Shaw ME, Alateeq K, et al. Volumetric brain differences in clinical depression in association with anxiety: a systematic review with meta-analysis. *J Psychiatry Neurosci* 2020.

DOI: 10.1503/jpn.190156

Online appendices are unedited and posted as supplied by the authors.

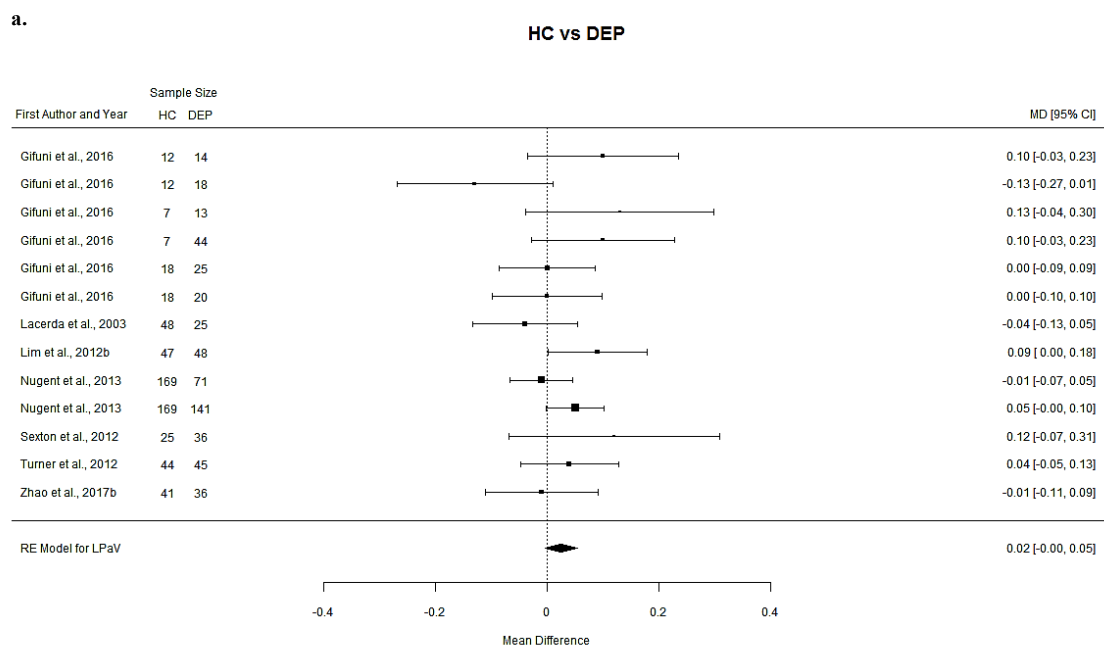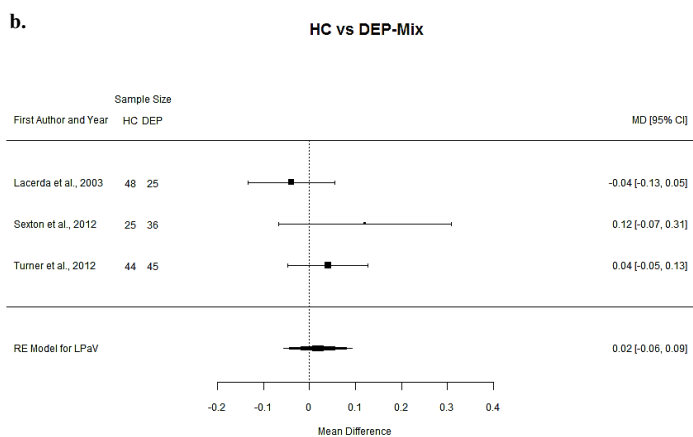

**Supplemental Figure S33. LPaV forest plots**

Forest plots of main analysis (a), and subgroup analysis for heterogeneous depression (Mix) (b).

LPaV: left pallidum volume, HC: healthy controls, DEP: depressed individuals, RE: random-effects model, MD: mean difference, CI: confidence interval.

**Appendix 1** to Espinoza Oyarce DA, Shaw ME, Alateeq K, et al. Volumetric brain differences in clinical depression in association with anxiety: a systematic review with meta-analysis. *J Psychiatry Neurosci* 2020.

DOI: 10.1503/jpn.190156

Online appendices are unedited and posted as supplied by the authors.

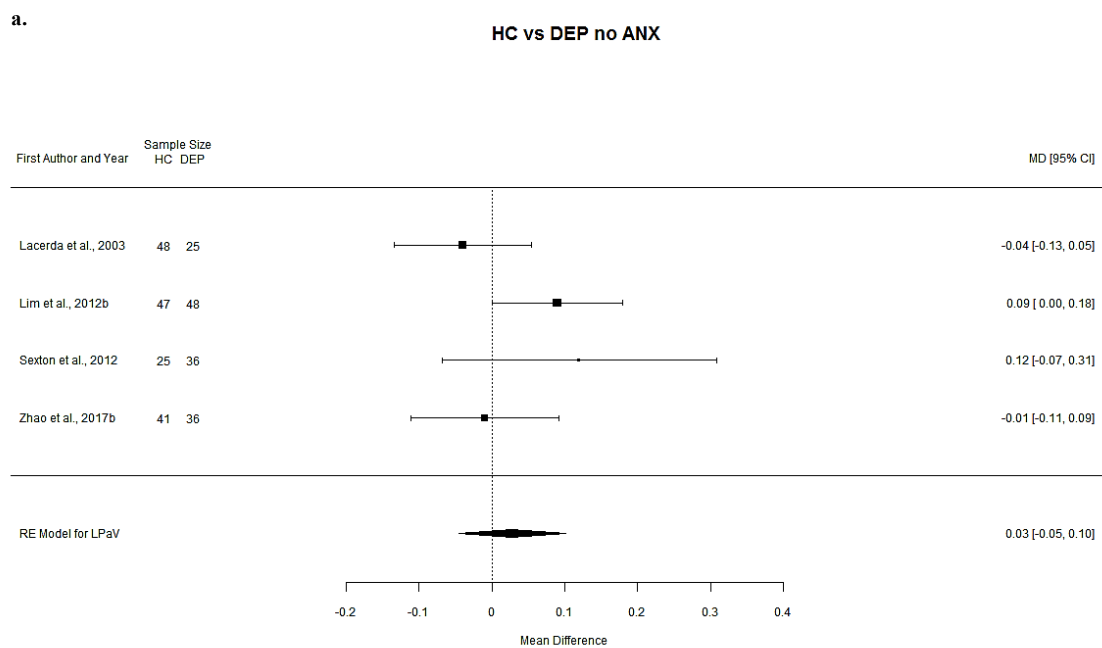

**Supplemental Figure S34. LPaV assessment of anxiety comorbidity forest plot**

Forest plot of main analysis (a) excluding anxiety disorders (no ANX).

LPaV: left pallidum volume, HC: healthy controls, DEP: depressed individuals, RE: random-effects model, MD: mean difference, CI: confidence interval.

Online appendices are unedited and posted as supplied by the authors.

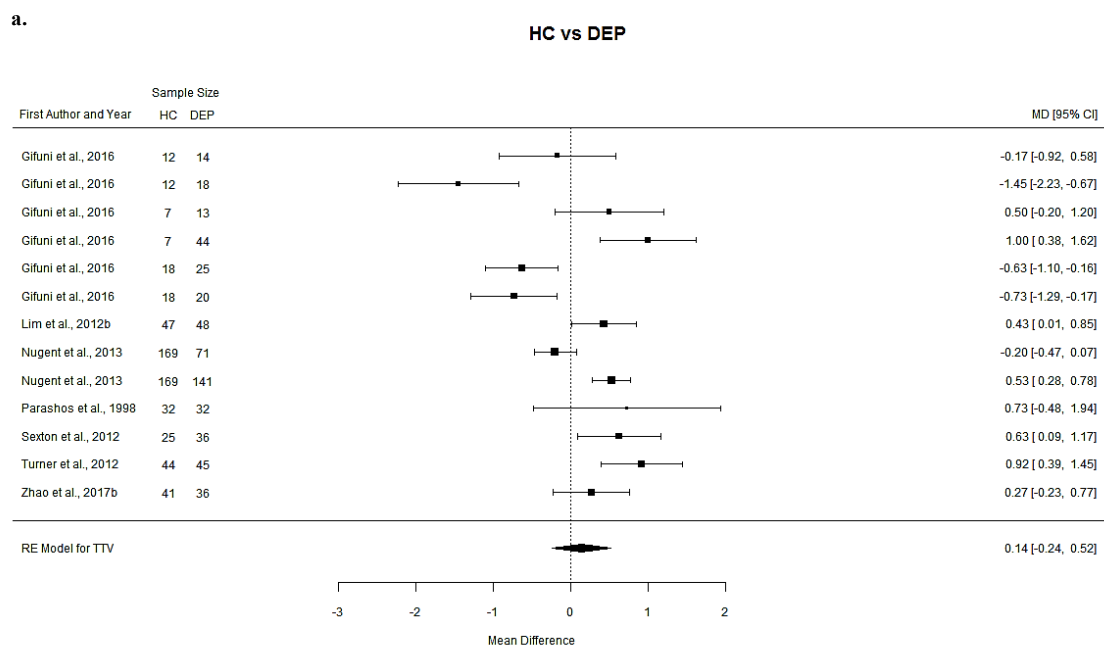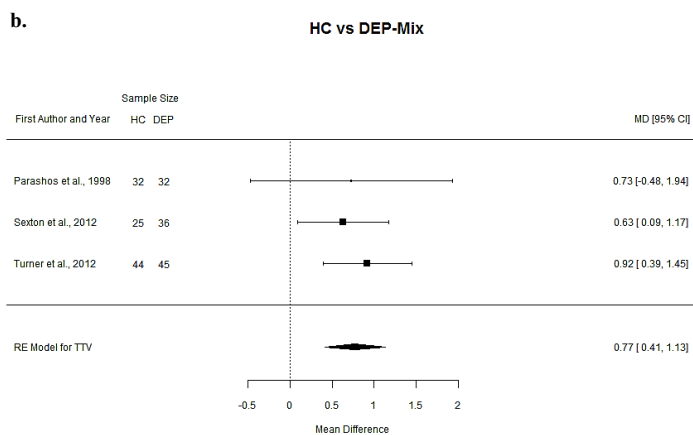

**Supplemental Figure S35. TTV forest plots**

Forest plots of main analysis (a), and subgroup analysis for heterogeneous depression (Mix) (b).

TTV: total thalamus volume, HC: healthy controls, DEP: depressed individuals, RE: random-effects model, MD: mean difference, CI: confidence interval.

**Appendix 1** to Espinoza Oyarce DA, Shaw ME, Alateeq K, et al. Volumetric brain differences in clinical depression in association with anxiety: a systematic review with meta-analysis. *J Psychiatry Neurosci* 2020.

DOI: 10.1503/jpn.190156

Online appendices are unedited and posted as supplied by the authors.

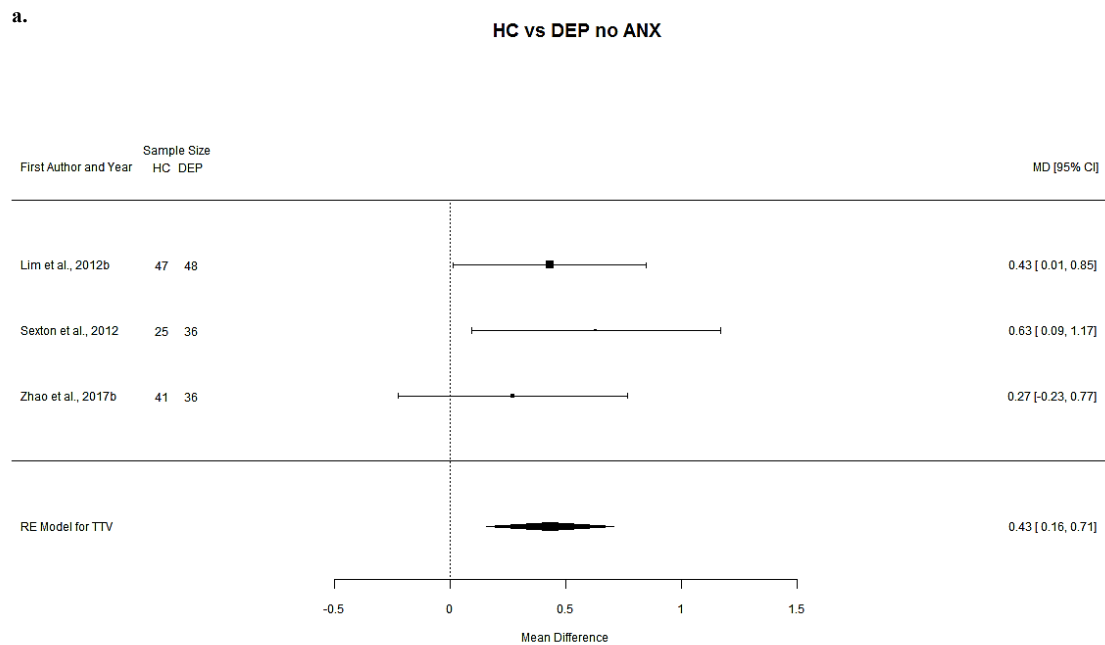

**Supplemental Figure S36. TTV assessment of anxiety comorbidity forest plot**

Forest plot of main analysis (a) excluding anxiety disorders (no ANX).

TTV: total thalamus volume, HC: healthy controls, DEP: depressed individuals, RE: random-effects model, MD: mean difference, CI: confidence interval.

Online appendices are unedited and posted as supplied by the authors.

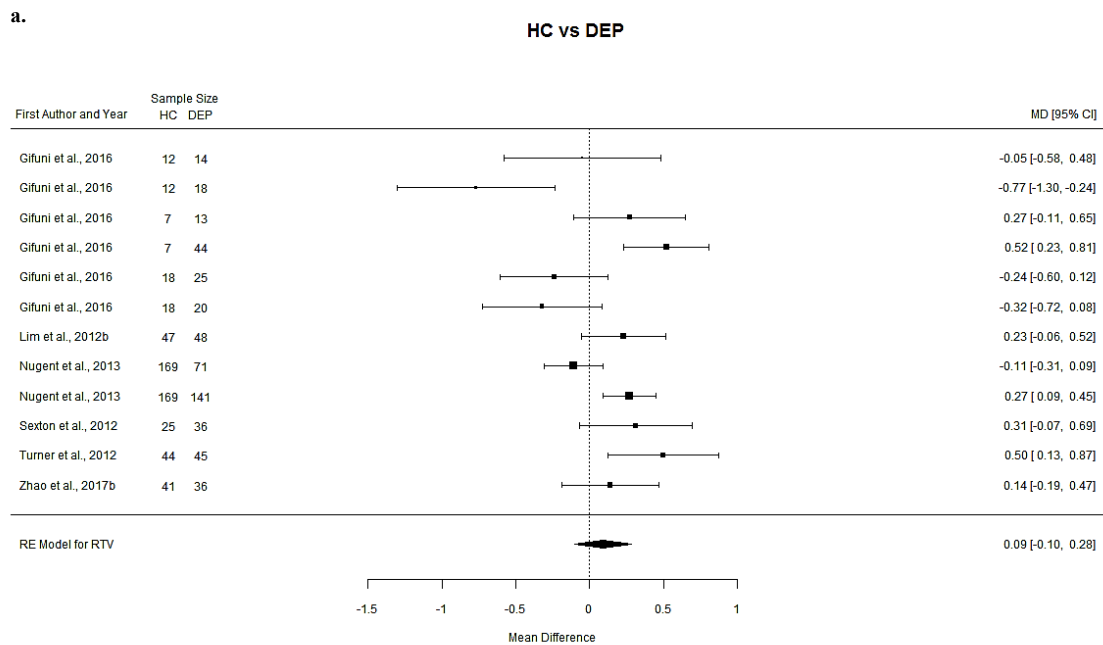

**Supplemental Figure S37. RTV forest plot**

Forest plot of main analysis (a).

RTV: right thalamus volume, HC: healthy controls, DEP: depressed individuals, RE: random-effects model, MD: mean difference, CI: confidence interval.



**Appendix 1** to Espinoza Oyarce DA, Shaw ME, Alateeq K, et al. Volumetric brain differences in clinical depression in association with anxiety: a systematic review with meta-analysis. *J Psychiatry Neurosci* 2020.

DOI: 10.1503/jpn.190156

Online appendices are unedited and posted as supplied by the authors.

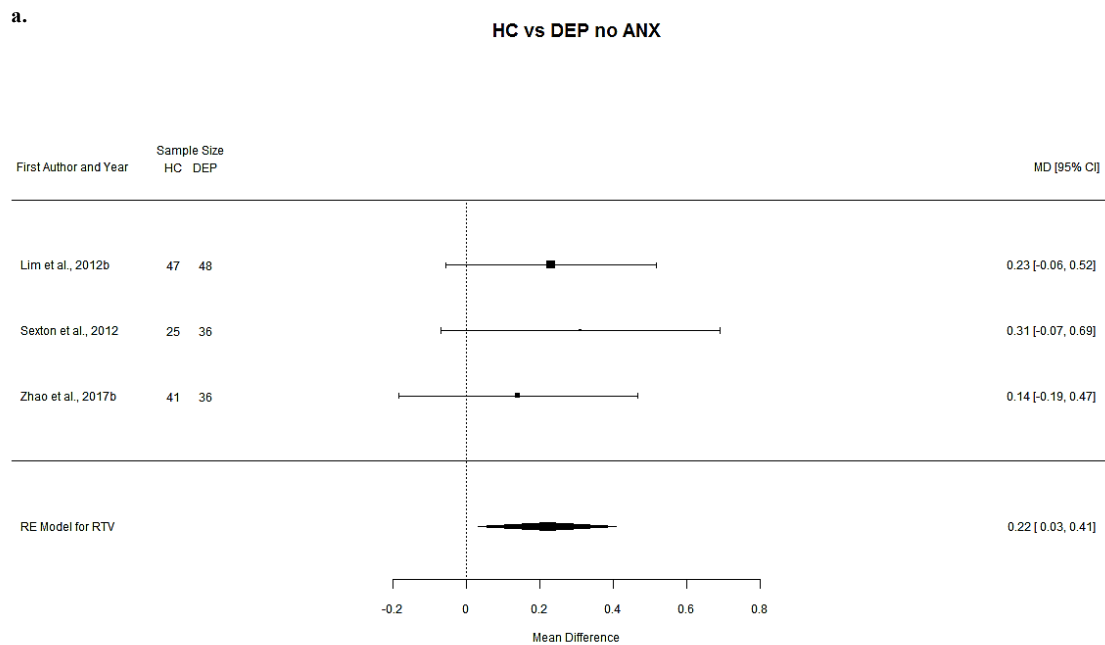

**Supplemental Figure S38. RTV assessment of anxiety comorbidity forest plot**

Forest plot of main analysis (a) excluding anxiety disorders (no ANX).

RTV: right thalamus volume, HC: healthy controls, DEP: depressed individuals, RE: random-effects model, MD: mean difference, CI: confidence interval.

**Appendix 1** to Espinoza Oyarce DA, Shaw ME, Alateeq K, et al. Volumetric brain differences in clinical depression in association with anxiety: a systematic review with meta-analysis. *J Psychiatry Neurosci* 2020.

DOI: 10.1503/jpn.190156

© Joule Inc. *Online appendices are unedited and posted as supplied by the authors.*

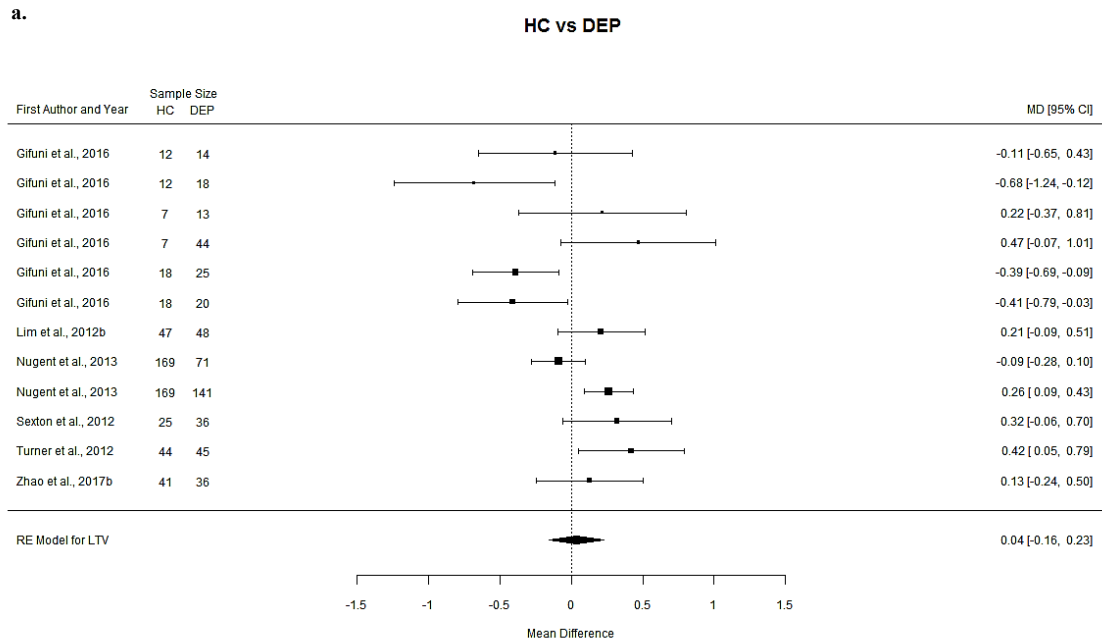

**Supplemental Figure S39. LTV forest plot**

Forest plot of main analysis (a).

LTV: left thalamus volume, HC: healthy controls, DEP: depressed individuals, RE: random-effects model, MD: mean difference, CI: confidence interval.

**Appendix 1** to Espinoza Oyarce DA, Shaw ME, Alateeq K, et al. Volumetric brain differences in clinical depression in association with anxiety: a systematic review with meta-analysis. *J Psychiatry Neurosci* 2020.

DOI: 10.1503/jpn.190156

Online appendices are unedited and posted as supplied by the authors.

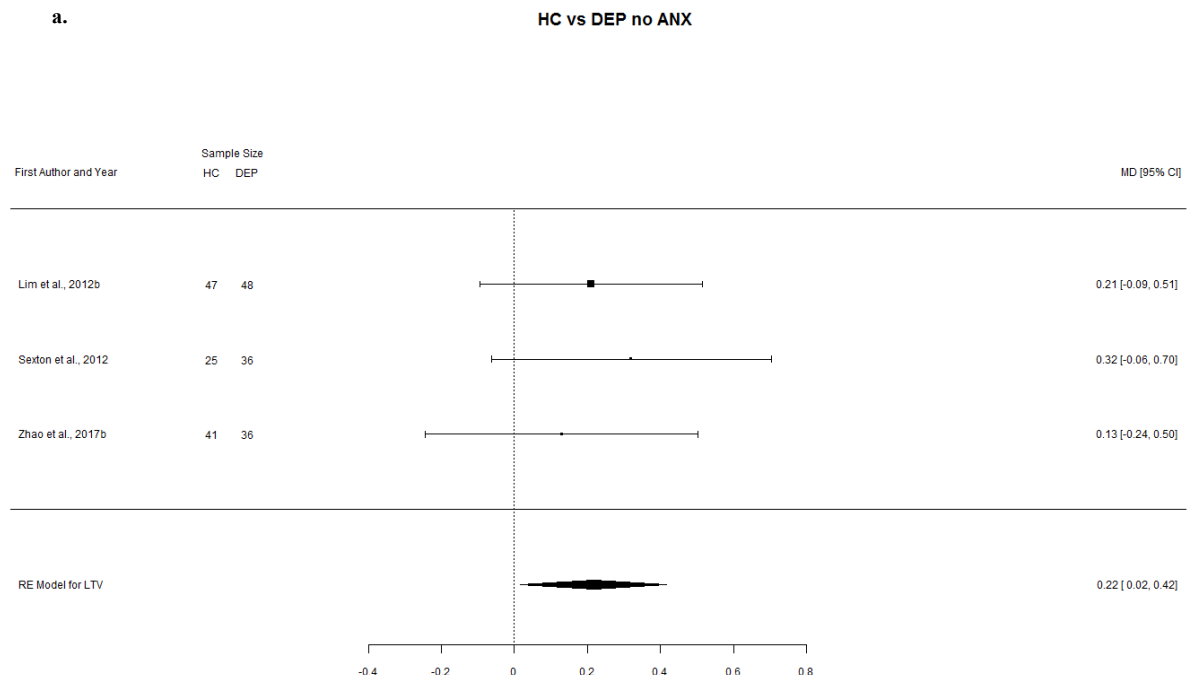

**Supplemental Figure S40. LTV assessment of anxiety comorbidity forest plot**

Forest plot of main analysis (a) excluding anxiety disorders (no ANX).

LTV: left thalamus volume, HC: healthy controls, DEP: depressed individuals, RE: random-effects model, MD: mean difference, CI: confidence interval.

**Appendix 1** to Espinoza Oyarce DA, Shaw ME, Alateeq K, et al. Volumetric brain differences in clinical depression in association with anxiety: a systematic review with meta-analysis. *J Psychiatry Neurosci* 2020.

DOI: 10.1503/jpn.190156

Online appendices are unedited and posted as supplied by the authors.

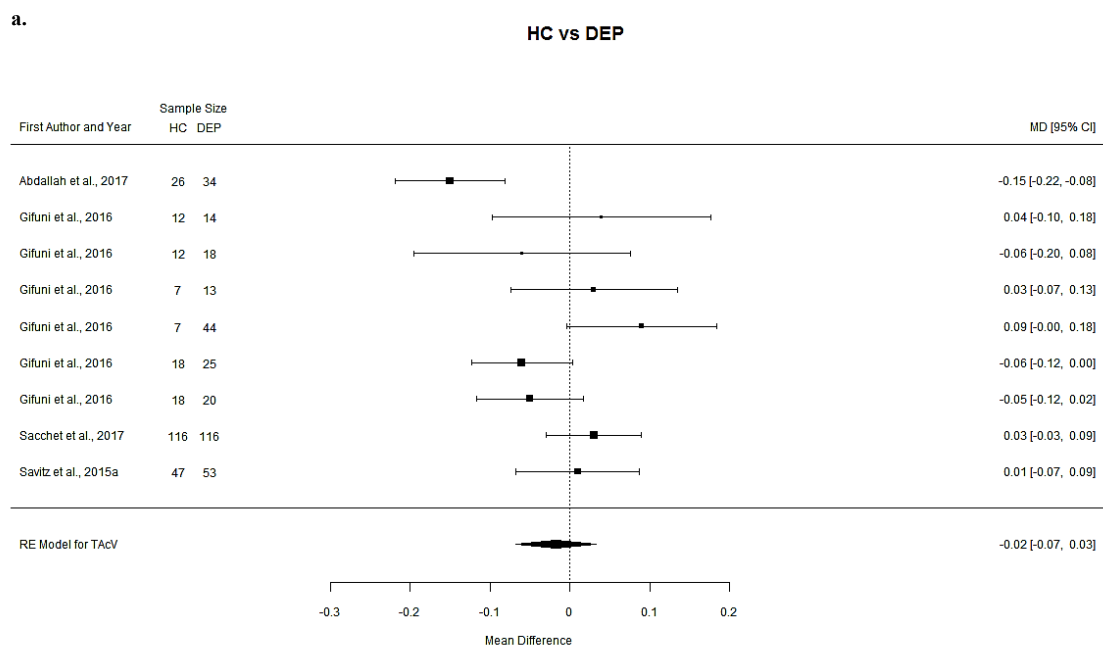

**Supplemental Figure S41. TAcV forest plot**

Forest plot of main analysis (a).

TAcV: total accumbens volume, HC: healthy controls, DEP: depressed individuals, RE: random-effects model, MD: mean difference, CI: confidence interval.

**Appendix 1** to Espinoza Oyarce DA, Shaw ME, Alateeq K, et al. Volumetric brain differences in clinical depression in association with anxiety: a systematic review with meta-analysis. *J Psychiatry Neurosci* 2020.

DOI: 10.1503/jpn.190156

Online appendices are unedited and posted as supplied by the authors.

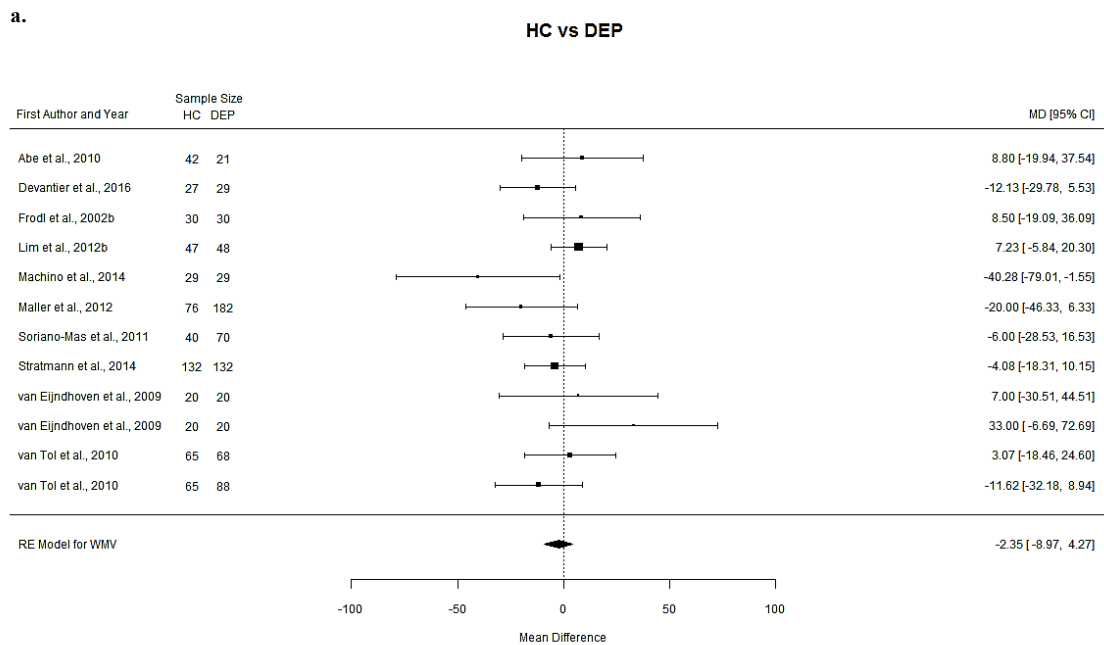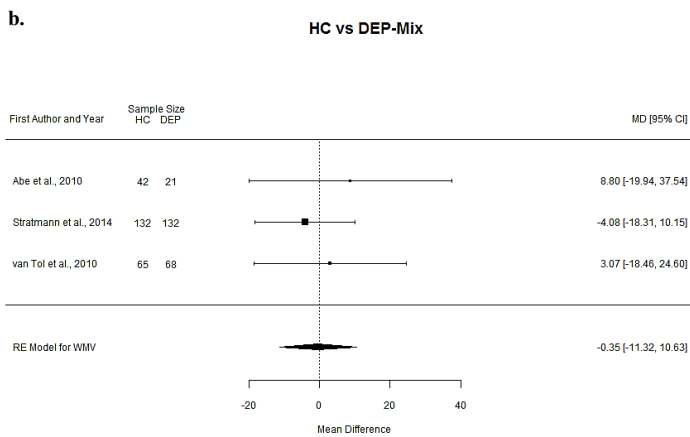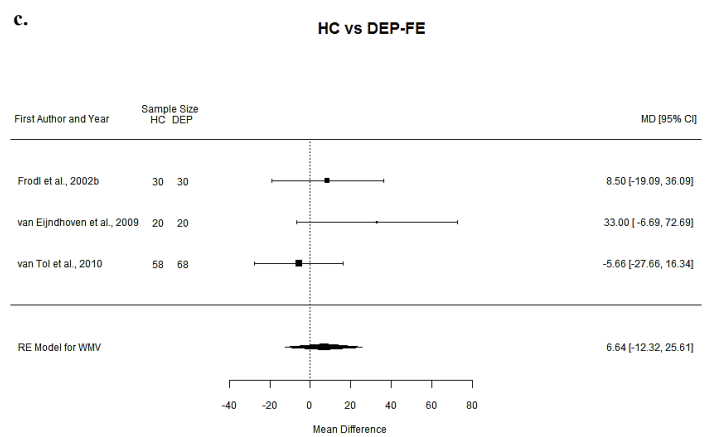

**Supplemental Figure S42. WMV forest plots**

Forest plots of main analysis (a), and subgroup analyses for heterogeneous depression (Mix) (b) and first-episode depression (FE) (c).

WMV: white matter volume, HC: healthy controls, DEP: depressed individuals, RE: random-effects model, MD: mean difference, CI: confidence interval.

**Appendix 1** to Espinoza Oyarce DA, Shaw ME, Alateeq K, et al. Volumetric brain differences in clinical depression in association with anxiety: a systematic review with meta-analysis. *J Psychiatry Neurosci* 2020.

DOI: 10.1503/jpn.190156

Online appendices are unedited and posted as supplied by the authors.

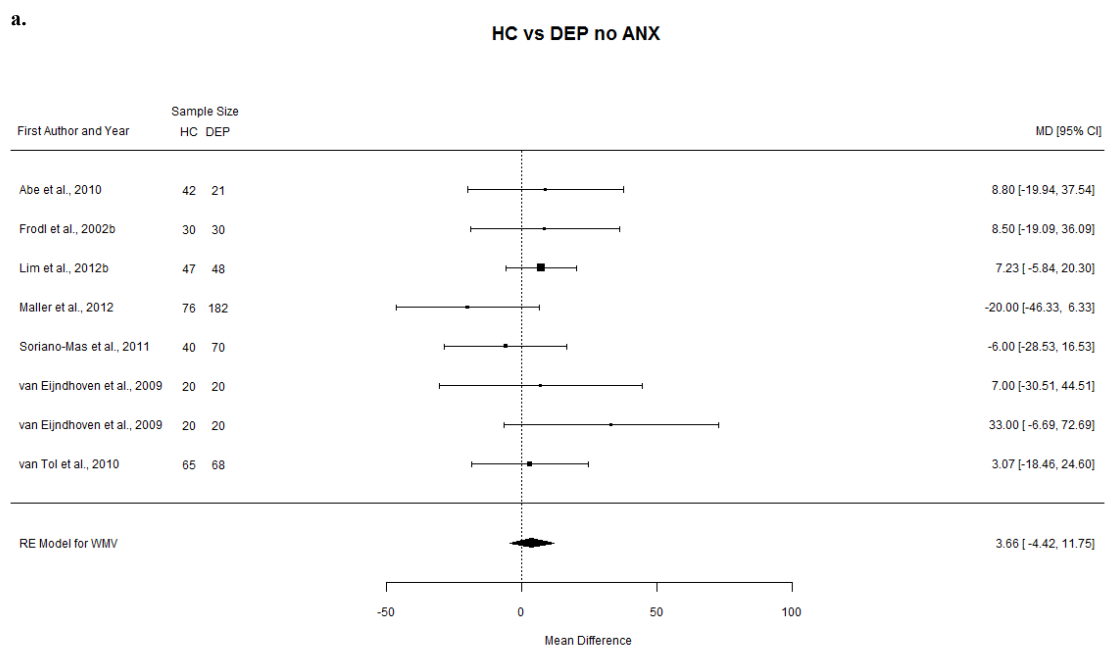

**Supplemental Figure S43. WMV assessment of anxiety comorbidity forest plot**

Forest plot of main analysis (a) excluding anxiety disorders (no ANX).

WMV: white matter volume, HC: healthy controls, DEP: depressed individuals, RE: random-effects model, MD: mean difference, CI: confidence interval.

**Appendix 1** to Espinoza Oyarce DA, Shaw ME, Alateeq K, et al. Volumetric brain differences in clinical depression in association with anxiety: a systematic review with meta-analysis. *J Psychiatry Neurosci* 2020.  
DOI: 10.1503/jpn.190156

( a.

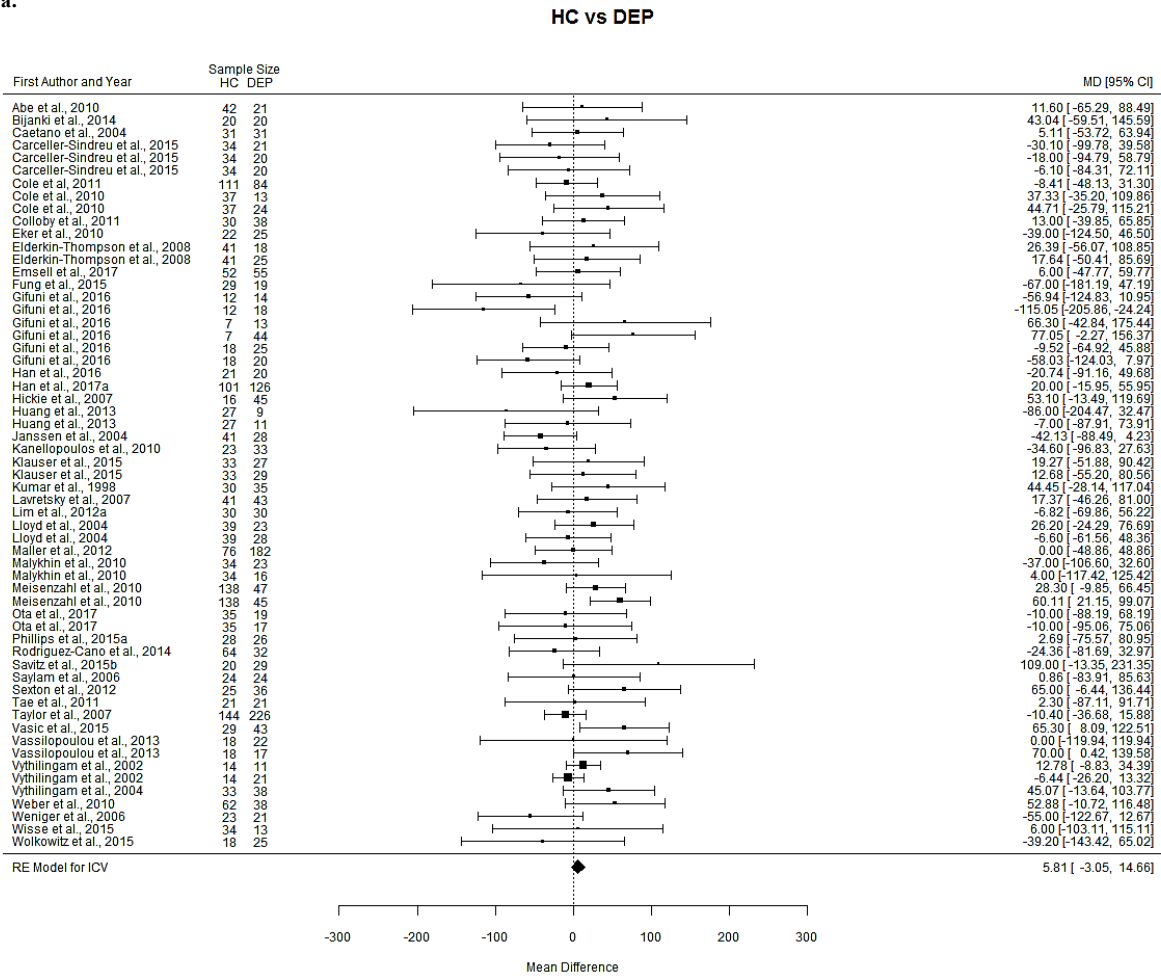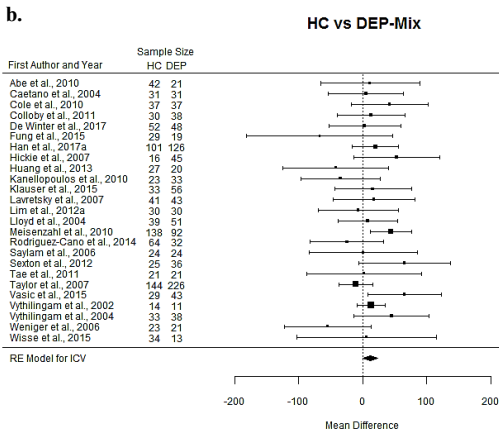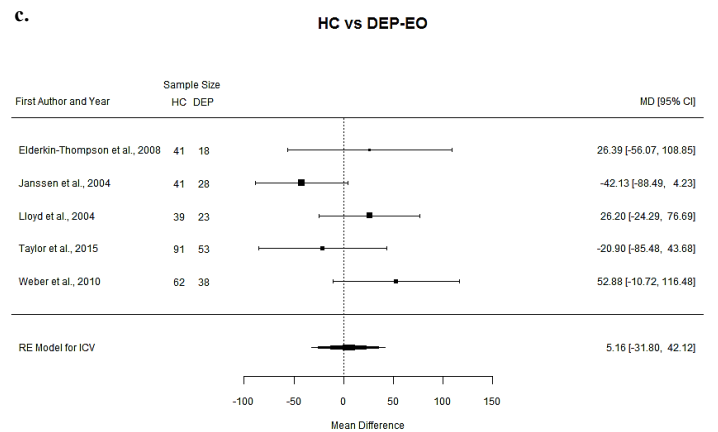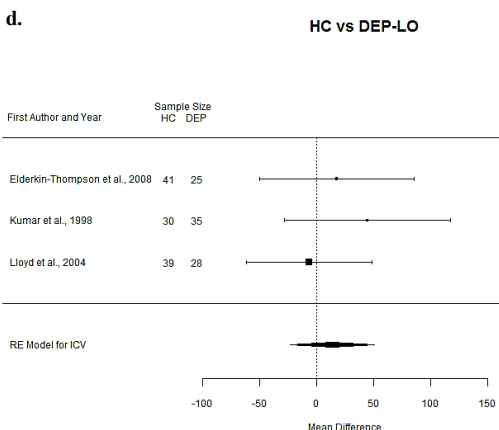

**Supplemental Figure S44. ICV forest plots**  
Forest plots of main analysis (a), and subgroup analyses for heterogeneous depression (Mix) (b), early-onset depression (EO) (c), and late-onset depression (LO) (d).

ICV: intracranial volume; HC: healthy controls, DEP: depressed individuals, RE: random-effects model, MD: mean difference, CI: confidence interval.

**Appendix 1** to Espinoza Oyarce DA, Shaw ME, Alateeq K, et al. Volumetric brain differences in clinical depression in association with anxiety: a systematic review with meta-analysis. *J Psychiatry Neurosci* 2020.

DOI: 10.1503/jpn.190156

Online appendices are unedited and posted as supplied by the authors.

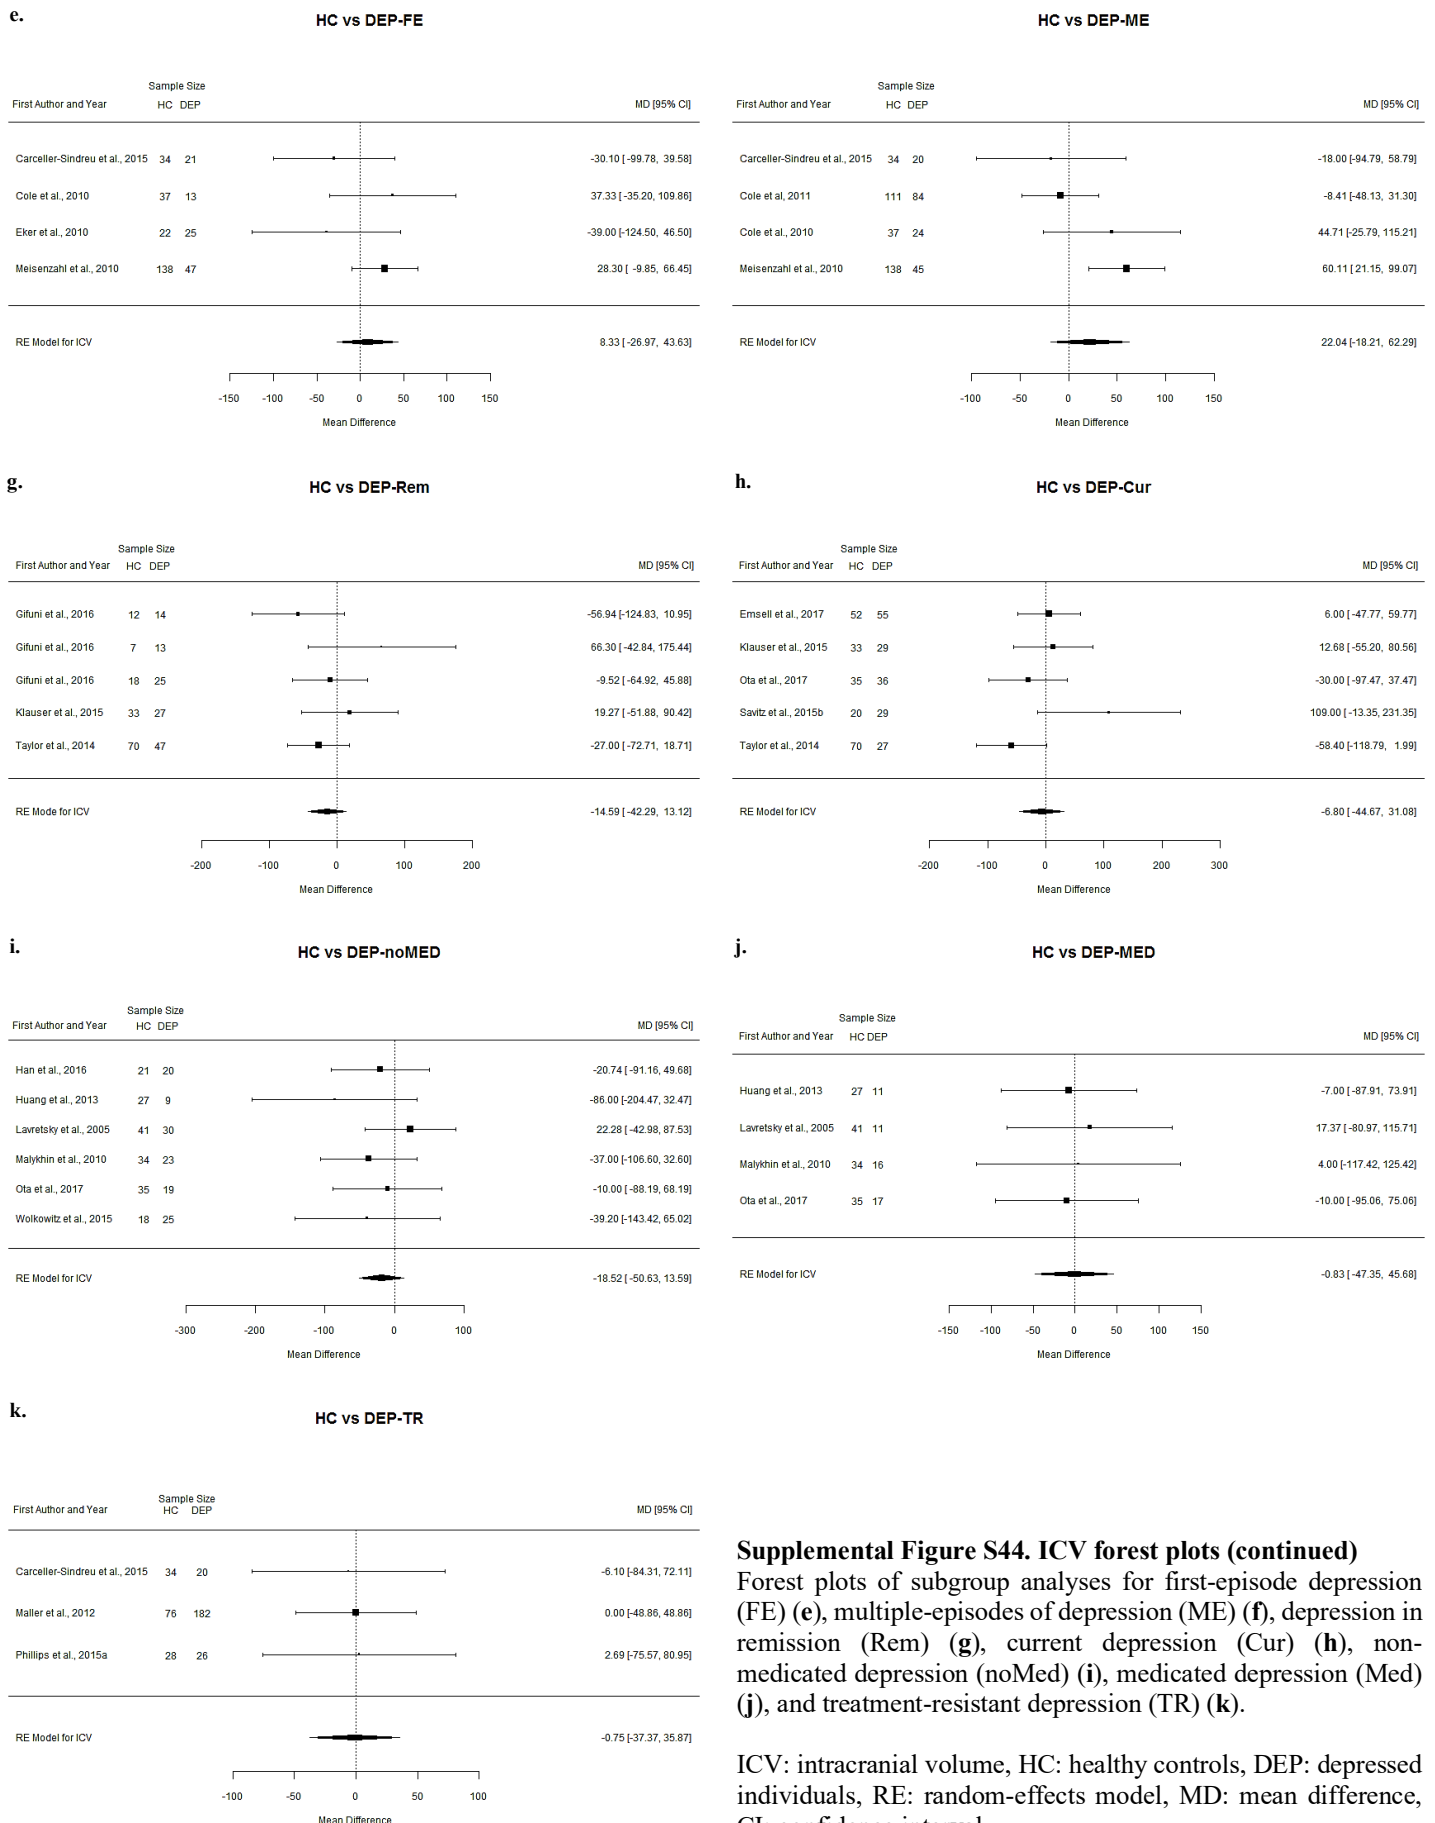

**Supplemental Figure S44. ICV forest plots (continued)**

Forest plots of subgroup analyses for first-episode depression (FE) (e), multiple-episodes of depression (ME) (f), depression in remission (Rem) (g), current depression (Cur) (h), non-medicated depression (noMed) (i), medicated depression (Med) (j), and treatment-resistant depression (TR) (k).

ICV: intracranial volume, HC: healthy controls, DEP: depressed individuals, RE: random-effects model, MD: mean difference, CI: confidence interval.



Online appendices are unedited and posted as supplied by the authors.

**a.**

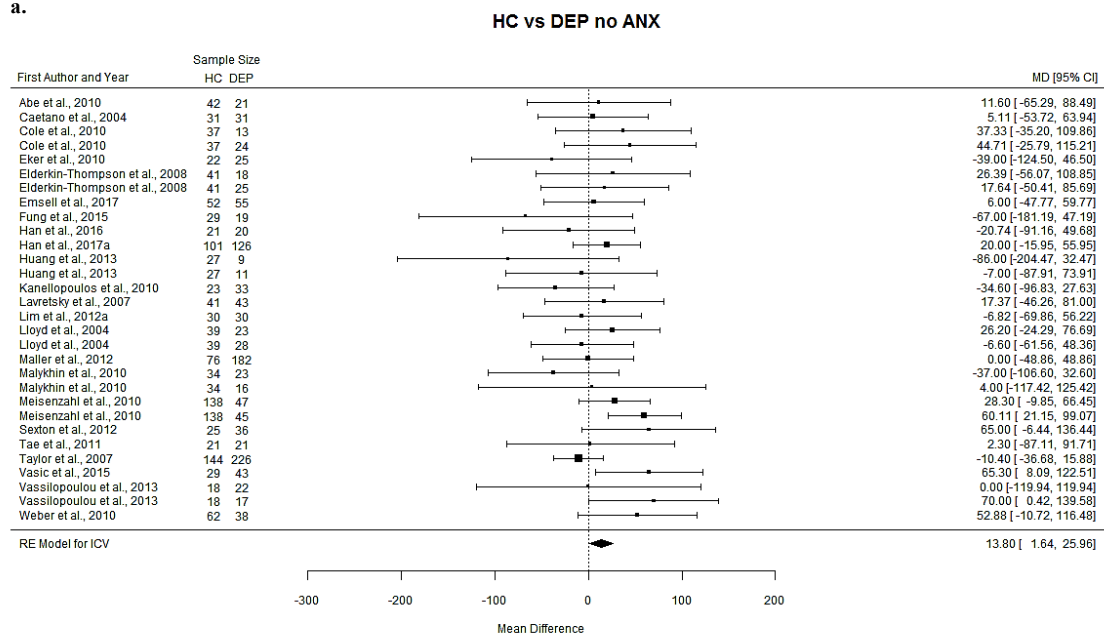

**b.**

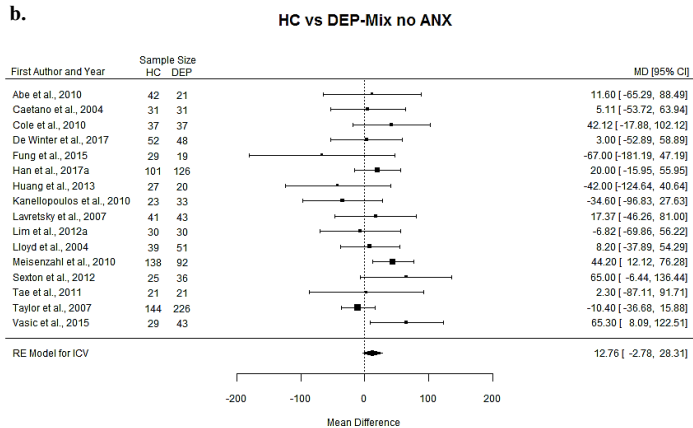

**c.**

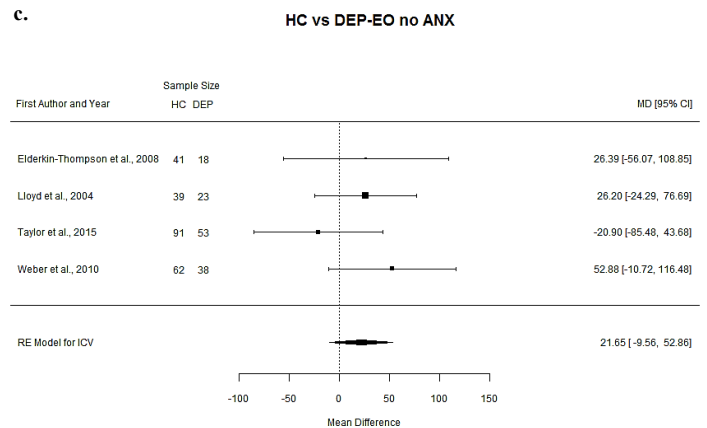

**d.**

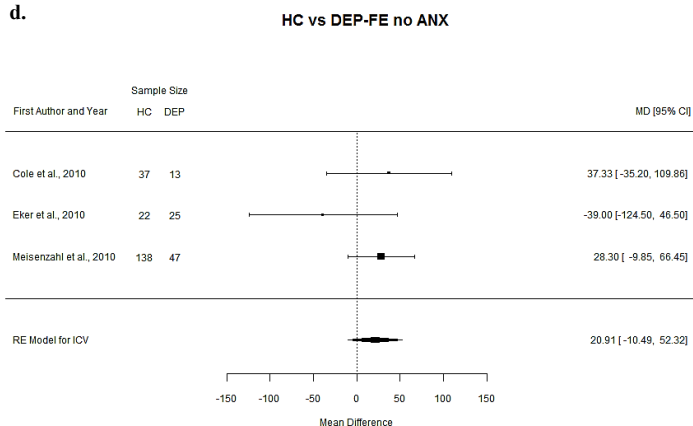

**e.**

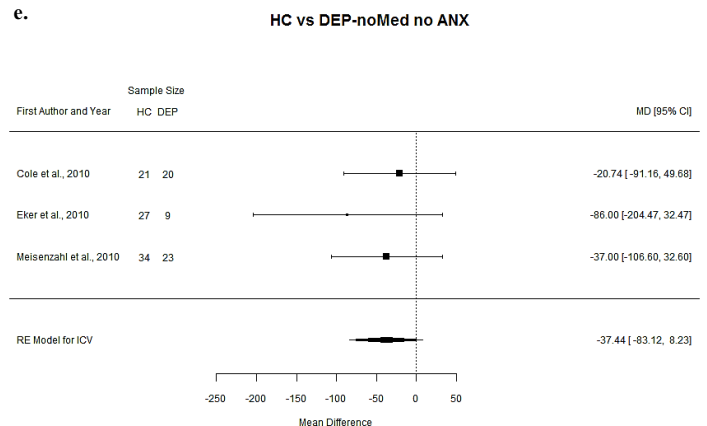

**Supplemental Figure S45. ICV assessment of anxiety comorbidity forest plots**

Forest plots of main analysis (a) and subgroup analyses for heterogeneous depression (Mix) (b), early-onset depression (EO) (c), first-episode of depression (FE) (d), and non-medicated depression (noMed) (e) excluding anxiety disorders (no ANX).

ICV: intracranial volume, HC: healthy controls, DEP: depressed individuals, RE: random-effects model, MD: mean difference, CI: confidence interval.

Online appendices are unedited and posted as supplied by the authors.

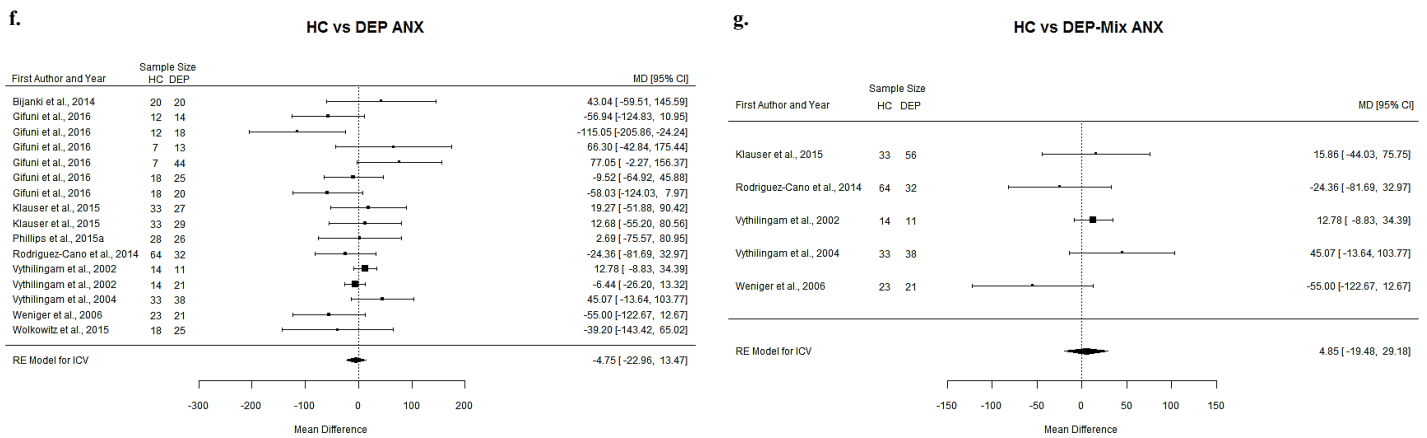

**Supplemental Figure S45. ICV assessment of anxiety comorbidity forest plots (continued)**

Forest plots for main analysis (f), and subgroup analysis for heterogeneous depression (Mix) (g) comorbid with anxiety disorders (no ANX).

ICV: intracranial volume, HC: healthy controls, DEP: depressed individuals, RE: random-effects model, MD: mean difference, CI: confidence interval.
